# Supplementary material for: Signaling diversity enabled by Rap1-regulated plasma membrane ERK with distinct temporal dynamics
Source: eLife. 2020 May 26;9:e57410. doi: 10.7554/eLife.57410 (PMC7289600; doi:10.7554/eLife.57410)
Supplement: Figure 1—source data 1. [file elife-57410-fig1-data1.xlsx]

## Sheet: Figure 1C
Time course data presented is the Y/C FRET ratio of individual cells and the average and SEM value for each time point.		EGF only
Due to occasional pausing and refocusing, some dish replicates may have values missing from certain time points.
Average value for each time point +/- SEM represented in main figures; supplemental figures show all traces	Time (min)	Cell 1	Cell 2	Cell 3	Cell 4	Cell 5	Cell 6	Cell 7	Cell 8	Cell 9	Cell 10	Cell 12	Cell 13	Cell 14	Cell 15	Cell 16	Cell 17	Cell 18	Cell 19	Cell 20	Cell 21	Cell 22	Cell 23	Cell 24	Cell 25	Cell 26	Cell 27	Cell 28	Cell 29	Cell 30	Cell 31	Cell 32	Cell 33	Cell 34	Cell 35	Cell 36	Cell 37	Cell 38	Cell 39	Cell 40	Cell 41	Cell 42	Cell 43	Cell 44	Cell 45	Cell 46	Cell 47	Cell 48	Cell 49
	-5.03798	0.939154	0.960436	0.983893	0.998451	0.970609	0.975597	0.960301	1.00545	0.958398	0.972355	0.981141	0.943318	0.9647	0.97941	0.973714	0.982532	0.981325	0.986254	0.996176	0.991895	0.999121	0.999725	0.999679	0.977357	0.993879	0.986035	0.982399	0.967734	0.982139	0.971406	0.97243	0.969303	0.971653	0.987014	0.994673	0.983414	0.958103	0.938914	0.939345	0.934529	0.987461	0.971655	0.983016	0.971529	0.970347	0.922334	0.975807	0.94536
	-4.53644	0.940994	0.970193	0.985618	0.998686	0.974895	0.972656	0.961012	1.01318	0.961444	0.970515	0.978439	0.950762	0.973718	0.989497	0.984318	0.98391	0.981073	0.987173	0.996152	0.982062	0.998168	0.996444	1.0047	0.982466	0.995553	0.989184	0.982827	0.97171	0.983467	0.975028	0.973154	0.970959	0.974849	0.988029	0.995804	0.983355	0.966482	0.949501	0.952982	0.949397	0.991414	0.972911	0.985537	0.976822	0.976312	0.931194	0.983776	0.95017
	-4.03644	0.95308	0.9809	0.99814	1.0107	0.979382	0.984631	0.969759	1.01001	0.968547	0.975079	0.983015	0.952737	0.975772	0.999666	0.989096	0.983256	0.980655	0.986676	0.995888	0.998088	0.992505	0.995535	1.00168	0.983145	0.997854	0.988905	0.98489	0.97298	0.980486	0.975479	0.9771	0.974646	0.97608	0.988488	0.994961	0.984569	0.969738	0.949389	0.952869	0.951004	0.988436	0.972965	0.983903	0.979466	0.976437	0.931913	0.977562	0.949285
	-3.53644	0.954423	0.972793	0.999705	0.999702	0.980251	0.977218	0.970717	1.00721	0.96964	0.978102	0.984568	0.957801	0.962918	0.977488	0.970691	0.984444	0.98398	0.990978	0.994814	0.991686	0.992522	1.0004	1.0001	0.983435	0.999036	0.99083	0.988839	0.978345	0.98347	0.980728	0.980669	0.977997	0.980902	0.990218	0.996492	0.986437	0.971225	0.958695	0.967523	0.957506	0.991191	0.975687	0.986699	0.980158	0.97919	0.939051	0.992836	0.942038
	-3.03644	0.964963	0.976334	0.995986	1.01668	0.980562	0.983945	0.97057	1.01097	0.970656	0.979637	0.984356	0.959837	0.975433	1.0103	0.990654	0.988041	0.986026	0.991002	0.993146	0.998405	0.999508	0.996184	1.00408	0.985862	0.997771	0.98846	0.985252	0.974986	0.98833	0.982802	0.98283	0.980067	0.981711	0.990965	0.995127	0.987951	0.980303	0.959754	0.968099	0.975046	0.988785	0.979688	0.985988	0.983357	0.977813	0.948311	1.00065	0.958636
	-2.53644	0.96024	0.97541	0.990995	0.994799	0.983946	0.982142	0.968428	1.01286	0.972802	0.977694	0.979621	0.967516	0.973836	0.994991	0.98747	0.987828	0.985823	0.992501	0.994186	0.998776	0.996687	0.996611	1.00229	0.986259	0.997122	0.990224	0.985399	0.974967	0.98873	0.987283	0.982916	0.98294	0.983009	0.993198	0.993259	0.987493	0.981646	0.969013	0.980026	0.969188	0.991728	0.98137	0.988172	0.983716	0.982502	0.954768	0.99242	0.971691
	-2.03644	0.969624	0.977106	0.999981	0.994701	0.978448	0.981247	0.973246	1.01017	0.974923	0.981602	0.984663	0.968697	0.985019	0.990313	1.00731	0.991454	0.988186	0.992905	0.994824	0.995108	0.996627	0.992399	1.00401	0.988819	0.997915	0.990225	0.988163	0.988702	0.985433	0.989036	0.983875	0.985749	0.986835	0.993437	0.996893	0.990469	0.982575	0.973607	0.970417	0.964412	0.992452	0.981413	0.987191	0.986804	0.984067	0.959056	0.995689	0.95913
	-1.5357	0.971993	0.995046	0.99654	1.00399	0.981504	0.983819	0.981343	1.01433	0.98001	0.984872	0.984802	0.974177	0.983104	1.00488	0.984753	0.992509	0.990601	0.993706	0.993672	1.00057	1.00154	0.995136	1.00308	0.987522	0.995971	0.99229	0.990701	0.989441	0.988394	0.989587	0.988131	0.989142	0.988671	0.995421	0.99638	0.992301	0.991411	0.971367	0.989989	0.986744	0.990068	0.984716	0.99003	0.991156	0.988622	0.96646	1.01886	0.982605
EGF addition	0	1	1	1	1	1	1	1	1	1	1	1	1	1	1	1	1	1	1	1	1	1	1	1	1	1	1	1	1	1	1	1	1	1	1	1	1	1	1	1	1	1	1	1	1	1	1	1	1
	0.477318	1.00853	1.00298	1.02038	1.00474	0.99623	0.998568	1.00191	0.995819	1.00239	0.998687	0.998805	1.00482	1.00246	1.00745	1.00298	1.0014	1.00392	1.00602	0.998796	1.00488	1.01257	0.999705	1.00755	1.00319	1.00304	1.00209	1.00693	1.01541	1.00472	1.00583	1.00592	1.00601	1.00343	1.00534	1.0013	1.00162	1.00302	0.99644	0.991597	0.995368	0.999294	1.00437	1.00097	1.00504	1.00072	1.00091	0.994989	0.991322
	0.977318	0.998403	0.999885	1.01501	1.00321	0.994446	0.995553	1.00334	0.988843	1.00491	1.00064	1.00059	1.00967	1.01573	1.01419	1.01084	1.00699	1.00583	1.00826	1.00286	1.00245	1.00958	1.01036	1.00812	1.00467	1.00149	1.00471	1.01482	1.00878	1.00835	1.00574	1.01121	1.00849	1.00711	1.0073	1.00234	1.00518	1.01132	1.01154	0.995868	0.991625	1.00185	1.00623	1.00079	1.00352	1.00574	1.01046	1.00981	1.03566
	1.47732	1.01116	1.01544	1.03078	1.01084	1.00623	1.00794	1.01011	0.995642	1.00965	1.00307	1.00476	1.0127	1.02678	1.03208	1.01429	1.01048	1.00862	1.01499	1.00305	1.01327	1.02332	1.00475	1.00958	1.01091	1.00732	1.01702	1.04472	1.01642	1.00918	1.00609	1.01178	1.01	1.00929	1.00792	1.00109	1.0087	1.02718	1.0148	0.996445	1.00075	1.0013	1.00652	1.00093	1.00375	1.00728	1.01484	1.01992	1.15172
	1.97732	1.01661	1.00723	1.03218	1.01922	1.00546	1.00717	1.01248	0.992871	1.01323	1.00413	1.0144	1.01507	1.05421	1.05142	1.05952	1.0305	1.01662	1.02473	1.01389	1.06879	1.03656	1.04631	1.02915	1.02567	1.01818	1.05291	1.13896	1.01969	1.01192	1.00403	1.01442	1.01291	1.01097	1.01176	1.00344	1.01905	1.0417	1.02953	1.00223	1.01203	1.00899	1.00932	1.00099	1.00637	1.01493	1.01834	1.11757	1.39835
	2.47732	1.01899	0.999318	1.07465	1.02887	1.00528	1.01304	1.02128	0.991664	1.01917	1.01072	1.04225	1.01827	1.17149	1.09748	1.16281	1.08508	1.03767	1.0665	1.04002	1.22406	1.07757	1.17302	1.12436	1.07601	1.0582	1.13245	1.32814	1.02849	1.02171	1.00284	1.01852	1.01455	1.01964	1.02033	1.01384	1.0504	1.09042	1.07318	1.01056	1.01257	1.04872	1.01425	1.00515	1.0063	1.04506	1.03528	1.29872	1.50799
	2.97732	1.02958	1.01557	1.16218	1.04068	1.01627	1.04375	1.03534	1.00258	1.03211	1.02381	1.10674	1.02751	1.33027	1.19709	1.29425	1.182	1.07565	1.16487	1.09343	1.45427	1.14667	1.44748	1.35761	1.1728	1.14981	1.25778	1.55249	1.06638	1.04947	1.01149	1.03191	1.0203	1.0385	1.04376	1.0477	1.13201	1.18596	1.16694	1.02718	1.05335	1.16611	1.02201	1.01554	1.01364	1.13513	1.05705	1.3923	1.51308
	3.47732	1.06366	1.03483	1.28033	1.07429	1.04139	1.09435	1.06093	1.01584	1.05714	1.04972	1.22045	1.03741	1.43528	1.27322	1.38114	1.33145	1.14668	1.33032	1.18197	1.60403	1.23763	1.74142	1.65182	1.32708	1.31442	1.40605	1.74581	1.13666	1.12592	1.02089	1.06065	1.03119	1.08104	1.09952	1.13292	1.28585	1.33598	1.29792	1.08863	1.12436	1.38975	1.04475	1.04148	1.02148	1.32127	1.10835	1.42539	1.51042
	3.97735	1.09704	1.029	1.40542	1.09692	1.08684	1.16646	1.09821	1.03758	1.08915	1.08736	1.37659	1.04572	1.4775	1.33157	1.40059	1.50808	1.23839	1.51584	1.30365	1.67818	1.34575	1.91769	1.86723	1.50319	1.50618	1.54461	1.84753	1.24854	1.25745	1.04517	1.11962	1.0568	1.1636	1.20452	1.29009	1.49533	1.47042	1.42183	1.18696	1.20078	1.64458	1.08786	1.08824	1.0409	1.57666	1.17833	1.41905	1.5162
	4.47735	1.16716	1.05108	1.50905	1.16959	1.15798	1.27087	1.1421	1.06566	1.14005	1.15236	1.54903	1.06265	1.47504	1.3789	1.40383	1.65678	1.33878	1.68393	1.42576	1.70498	1.42087	1.96285	1.96508	1.6463	1.66793	1.65922	1.90776	1.41863	1.43599	1.09606	1.2221	1.10317	1.2808	1.35182	1.49142	1.69812	1.55764	1.49122	1.29619	1.22823	1.80198	1.15994	1.16912	1.0753	1.76807	1.25535	1.42549	1.53067
	4.97774	1.25093	1.07287	1.5843	1.24516	1.2572	1.39757	1.20727	1.10382	1.20323	1.23054	1.70189	1.07768	1.47905	1.3838	1.41301	1.77042	1.41974	1.76732	1.53914	1.71971	1.4761	1.97356	1.99778	1.74226	1.77665	1.73125	1.9258	1.5604	1.61823	1.16207	1.35098	1.17355	1.40781	1.52016	1.67106	1.83868	1.61186	1.52852	1.41931	1.32801	1.85428	1.26291	1.28295	1.12421	1.87801	1.34378	1.43124	1.53808
	5.47774	1.35305	1.12077	1.63553	1.33213	1.36197	1.50454	1.27453	1.15601	1.28126	1.3318	1.8216	1.10156	1.5035	1.40382	1.41733	1.83781	1.48583	1.81701	1.61922	1.72743	1.49761	2.00006	1.99904	1.80327	1.83716	1.77761	1.9334	1.64181	1.76409	1.24966	1.49091	1.26275	1.50976	1.67324	1.78537	1.91125	1.63619	1.55361	1.48495	1.34746	1.86939	1.38771	1.42741	1.18405	1.90655	1.41663	1.43265	1.54016
	5.97774	1.42969	1.15085	1.65912	1.42165	1.46039	1.58872	1.33987	1.19739	1.36071	1.42879	1.89008	1.12629	1.49885	1.40853	1.44304	1.87635	1.51839	1.83655	1.6765	1.72132	1.51517	2.0034	2.02353	1.83149	1.87033	1.80188	1.93239	1.68177	1.86275	1.33711	1.62762	1.36595	1.57415	1.78725	1.84427	1.94575	1.66092	1.54519	1.54295	1.36318	1.87059	1.52347	1.57542	1.25367	1.91733	1.49086	1.43299	1.54166
	6.47774	1.50961	1.20021	1.68889	1.50083	1.541	1.62289	1.40577	1.24234	1.44444	1.5279	1.93588	1.1568	1.51383	1.40355	1.43296	1.89652	1.54139	1.84553	1.70163	1.73807	1.53629	1.99834	2.01342	1.84437	1.88437	1.81301	1.93354	1.72521	1.91328	1.41705	1.72693	1.46298	1.60589	1.8589	1.87073	1.9611	1.66154	1.5498	1.5918	1.41426	1.87124	1.65094	1.70816	1.33521	1.93311	1.54318	1.43756	1.53389
	6.97774	1.57702	1.2416	1.7124	1.55957	1.60317	1.66137	1.47086	1.28197	1.52537	1.61678	1.95271	1.18969	1.50958	1.41033	1.43929	1.90748	1.55727	1.84388	1.72027	1.75651	1.54755	2.00135	2.01618	1.85027	1.88711	1.8162	1.92649	1.7295	1.9335	1.47687	1.79683	1.53986	1.61742	1.9036	1.87749	1.96564	1.67533	1.56064	1.62089	1.43889	1.8763	1.74837	1.80932	1.41413	1.93705	1.58329	1.4158	1.52553
	7.47774	1.61493	1.2629	1.72687	1.63294	1.64379	1.69054	1.51538	1.31715	1.59544	1.68819	1.96319	1.22292	1.51023	1.39725	1.4449	1.90582	1.55712	1.84434	1.72884	1.77372	1.55183	2.01191	2.01551	1.85105	1.88922	1.82329	1.92565	1.73558	1.94666	1.519	1.84093	1.59433	1.62126	1.92851	1.8835	1.96581	1.66291	1.55595	1.62946	1.42633	1.88387	1.8215	1.88532	1.49331	1.93665	1.6095	1.40565	1.51077
	7.97774	1.64749	1.29805	1.70995	1.66236	1.66323	1.6994	1.55575	1.34377	1.64978	1.74062	1.96926	1.25408	1.53356	1.40298	1.43338	1.91254	1.56172	1.84319	1.73257	1.77151	1.55174	2.0033	2.02021	1.85073	1.89478	1.81422	1.91097	1.74679	1.95708	1.5505	1.86234	1.63009	1.62535	1.94154	1.88028	1.96908	1.65734	1.55474	1.63677	1.44297	1.88103	1.86864	1.93181	1.56545	1.93684	1.60622	1.46066	1.56572
	8.47774	1.6622	1.31158	1.70478	1.71615	1.68417	1.7073	1.58605	1.3663	1.69596	1.78154	1.97021	1.28883	1.52043	1.42401	1.43995	1.91269	1.56264	1.83774	1.7318	1.78137	1.55521	2.00733	2.01618	1.85248	1.89479	1.8087	1.92458	1.75748	1.96027	1.56257	1.87378	1.64812	1.62641	1.93851	1.87594	1.96528	1.67453	1.57312	1.65372	1.45258	1.88834	1.90574	1.96398	1.63215	1.94105	1.62157	1.4553	1.53005
	8.97774	1.68013	1.33173	1.70769	1.73852	1.70289	1.73154	1.60962	1.38354	1.72448	1.80736	1.96718	1.32275	1.53299	1.44529	1.44165	1.91376	1.5567	1.84056	1.73128	1.77201	1.54903	1.99351	2.01166	1.84726	1.89666	1.79564	1.91647	1.75566	1.9731	1.57039	1.88267	1.65805	1.62539	1.94168	1.88074	1.97222	1.66433	1.57606	1.6734	1.47914	1.89043	1.92659	1.98393	1.69538	1.94657	1.631	1.46921	1.53289
	9.47774	1.68378	1.33846	1.70334	1.72952	1.69699	1.71441	1.61734	1.38334	1.7432	1.8235	1.96641	1.35399	1.54302	1.43418	1.47361	1.91609	1.55665	1.83443	1.72757	1.78484	1.554	2.00349	2.00825	1.84567	1.8935	1.78156	1.89835	1.76344	1.97066	1.57728	1.88338	1.66894	1.62567	1.93952	1.88211	1.97379	1.66901	1.56915	1.68387	1.46474	1.89659	1.94168	1.9935	1.75081	1.94056	1.63158	1.44947	1.51427
	9.97774	1.69165	1.35926	1.70237	1.77263	1.70585	1.71857	1.62508	1.39083	1.76091	1.83383	1.9661	1.38617	1.51778	1.44991	1.44949	1.89524	1.54896	1.8354	1.7228	1.8032	1.57481	2.00324	2.00922	1.84153	1.88985	1.76553	1.90065	1.75387	1.96548	1.57541	1.88711	1.67106	1.62582	1.93924	1.88154	1.97635	1.67155	1.57761	1.69725	1.46423	1.89787	1.95073	2.00295	1.78947	1.9427	1.62851	1.42838	1.52466
	10.4777	1.69689	1.38414	1.73486	1.80358	1.71203	1.73585	1.62872	1.41033	1.77673	1.84878	1.96182	1.40947	1.53046	1.46688	1.46015	1.8999	1.54243	1.83769	1.71985	1.76575	1.56345	1.98338	1.99398	1.83981	1.89251	1.75195	1.88084	1.76117	1.97447	1.58175	1.88637	1.66952	1.6258	1.94155	1.88115	1.97539	1.66694	1.58105	1.7052	1.46975	1.89956	1.95335	2.00724	1.80255	1.94376	1.63771	1.47715	1.55548
	10.9777	1.69589	1.37731	1.72347	1.79944	1.71752	1.73006	1.62847	1.40938	1.77178	1.85561	1.96206	1.43904	1.51976	1.45515	1.47341	1.89277	1.53485	1.82805	1.71245	1.78831	1.56432	1.99237	1.99385	1.83527	1.88639	1.74007	1.87748	1.76846	1.97729	1.58156	1.8817	1.67227	1.62469	1.94055	1.87816	1.97541	1.6708	1.57505	1.7106	1.46372	1.89842	1.95753	2.01118	1.83181	1.94221	1.63574	1.47455	1.54444
	11.4777	1.69919	1.38002	1.70594	1.81035	1.71159	1.73617	1.63045	1.403	1.7766	1.86381	1.95651	1.46128	1.54559	1.41254	1.46535	1.87853	1.52307	1.82361	1.70684	1.77709	1.56077	1.98007	1.97949	1.82625	1.88255	1.72807	1.86643	1.77636	1.97602	1.58325	1.88539	1.67129	1.62629	1.9382	1.88009	1.97752	1.67566	1.59291	1.71656	1.49361	1.90734	1.96534	2.01595	1.85551	1.94786	1.63716	1.43438	1.51736
	11.9777	1.70867	1.38555	1.70776	1.82077	1.71262	1.72759	1.63964	1.41531	1.78261	1.86706	1.95798	1.48176	1.54259	1.42164	1.4499	1.86697	1.51593	1.81727	1.69571	1.77922	1.5565	1.9693	1.97968	1.81948	1.87024	1.71247	1.85846	1.76398	1.98348	1.58433	1.88412	1.66947	1.62387	1.93848	1.88168	1.97567	1.67259	1.59471	1.71567	1.47173	1.90447	1.9614	2.01607	1.86583	1.94816	1.63243	1.46335	1.52818
	12.4777	1.69379	1.37173	1.69667	1.81242	1.69371	1.72665	1.63462	1.40918	1.77926	1.87474	1.95067	1.4991	1.52186	1.42277	1.4706	1.85581	1.50395	1.81636	1.68895	1.71353	1.52414	1.89277	1.92997	1.80588	1.86261	1.70143	1.8456	1.77775	1.97996	1.58563	1.88605	1.66793	1.62393	1.93546	1.8825	1.97574	1.66326	1.59367	1.71162	1.47664	1.91033	1.95884	2.01742	1.88022	1.9549	1.63355	1.47141	1.53004
	12.9777	1.69081	1.38545	1.68582	1.83223	1.7015	1.73891	1.63539	1.41208	1.78476	1.87764	1.95113	1.51794	1.5356	1.43547	1.46229	1.84888	1.49091	1.80412	1.67636	1.75646	1.54754	1.93282	1.94084	1.80024	1.85628	1.68091	1.82816	1.76981	1.96712	1.58011	1.87698	1.66511	1.62048	1.92891	1.87623	1.97078	1.6559	1.57966	1.70954	1.47965	1.9069	1.95209	2.01948	1.88069	1.9478	1.64429	1.4805	1.56884
	13.4777	1.71585	1.40255	1.72013	1.82206	1.69113	1.7391	1.62992	1.40826	1.78124	1.8858	1.94487	1.52807	1.50875	1.41369	1.45523	1.82422	1.48012	1.79849	1.66182	1.76654	1.54138	1.90496	1.918	1.79175	1.84139	1.65841	1.81843	1.77474	1.99102	1.58504	1.88051	1.66472	1.62196	1.93225	1.87479	1.97391	1.6503	1.59247	1.68778	1.47032	1.90946	1.95364	2.01806	1.88721	1.94177	1.63656	1.45758	1.52531
	13.9777	1.64978	1.33981	1.65294	1.76362	1.67079	1.69638	1.61231	1.40108	1.77315	1.87954	1.93537	1.54349	1.51258	1.4156	1.45873	1.81129	1.46987	1.79151	1.65408	1.75343	1.54751	1.89275	1.89842	1.78671	1.83785	1.64663	1.80444	1.7842	1.97907	1.58941	1.88424	1.66264	1.62009	1.93215	1.87953	1.97083	1.65997	1.58999	1.71847	1.49644	1.90239	1.95363	2.01796	1.89211	1.94477	1.64244	1.47151	1.50043
	14.4777	1.71778	1.38599	1.69257	1.81922	1.69076	1.73666	1.63138	1.4122	1.78797	1.89943	1.93749	1.55675	1.50641	1.3936	1.44018	1.79748	1.45626	1.7789	1.63891	1.7236	1.54557	1.85298	1.87436	1.77901	1.82263	1.63456	1.79228	1.77919	1.96962	1.58253	1.87655	1.66029	1.61588	1.92726	1.87591	1.96922	1.68211	1.61827	1.76538	1.49866	1.91104	1.95523	2.01314	1.89714	1.94709	1.64472	1.45001	1.49545
	14.9777	1.71982	1.42024	1.71008	1.84406	1.69576	1.73658	1.62869	1.41589	1.78904	1.91023	1.93344	1.56253	1.49837	1.40948	1.46432	1.77843	1.44205	1.76762	1.62566	1.70739	1.54567	1.85022	1.85201	1.76767	1.8104	1.61178	1.77463	1.77678	1.97099	1.58523	1.88019	1.65713	1.6135	1.92457	1.87128	1.96759	1.65793	1.59429	1.72523	1.48298	1.90095	1.94979	2.0117	1.89624	1.94449	1.64129	1.4487	1.52508
	15.4777	1.65026	1.35384	1.62801	1.75343	1.64979	1.69746	1.60408	1.39251	1.77036	1.90206	1.9175	1.56327	1.49098	1.40208	1.42884	1.76836	1.42984	1.76228	1.61222	1.69911	1.54001	1.81667	1.82872	1.75564	1.80051	1.59501	1.75596	1.78825	1.98187	1.58799	1.87722	1.65465	1.60985	1.92121	1.86942	1.96686	1.64241	1.59237	1.70997	1.49049	1.90258	1.94835	2.00626	1.89528	1.9341	1.63242	1.4457	1.50042
	15.9777	1.73281	1.41583	1.69099	1.82355	1.68021	1.73395	1.63539	1.40584	1.78894	1.92488	1.92242	1.57454	1.49495	1.40614	1.43771	1.75617	1.41552	1.75555	1.5969	1.69526	1.52903	1.79698	1.79791	1.75011	1.78516	1.57382	1.74389	1.77847	1.97517	1.58615	1.87464	1.65083	1.60703	1.92163	1.86719	1.9624	1.63638	1.59845	1.70253	1.47049	1.89831	1.94337	2.01027	1.89711	1.93624	1.63714	1.42018	1.47399
	16.4777	1.72523	1.41436	1.68584	1.82927	1.67191	1.72991	1.63369	1.40387	1.78376	1.93026	1.91324	1.57243	1.4769	1.37615	1.4261	1.73047	1.40113	1.74539	1.57864	1.68477	1.53635	1.76893	1.76829	1.73385	1.77179	1.55766	1.72434	1.78911	1.9725	1.58377	1.87138	1.64927	1.60285	1.92194	1.86221	1.95618	1.6482	1.59999	1.71532	1.47792	1.89736	1.94275	2.00544	1.89744	1.92526	1.63723	1.44204	1.45542
	16.9777	1.71064	1.4096	1.66646	1.80038	1.66496	1.72514	1.6267	1.39089	1.77791	1.93376	1.90878	1.57802	1.46753	1.39273	1.42616	1.72134	1.38679	1.73086	1.56819	1.66974	1.52329	1.73627	1.74873	1.73087	1.76227	1.54226	1.71015	1.77188	1.96979	1.58159	1.86812	1.6447	1.60123	1.92028	1.862	1.95381	1.63283	1.58707	1.71375	1.45013	1.88909	1.93329	1.99982	1.8922	1.91838	1.63708	1.4301	1.49322
	17.4777	1.72766	1.42913	1.68165	1.84423	1.66427	1.74481	1.62817	1.40067	1.7795	1.94568	1.9029	1.58215	1.46296	1.39539	1.41941	1.70038	1.37661	1.72353	1.55181	1.6623	1.54202	1.71315	1.72339	1.72317	1.74573	1.52661	1.69472	1.76287	1.9655	1.57739	1.8674	1.63961	1.59758	1.91447	1.85689	1.94684	1.62948	1.59988	1.73389	1.49415	1.88748	1.93095	1.99651	1.89988	1.91653	1.64445	1.45852	1.47229
	17.9777	1.70291	1.41183	1.65282	1.80561	1.64817	1.73001	1.62279	1.39509	1.77325	1.93316	1.88941	1.5757	1.40433	1.38387	1.38694	1.68233	1.36144	1.70368	1.5368	1.63981	1.52441	1.68252	1.68982	1.71827	1.7307	1.50773	1.67299	1.78251	1.95813	1.57879	1.86801	1.6389	1.59645	1.91229	1.85468	1.9455	1.6205	1.58234	1.72729	1.49236	1.87497	1.92673	1.99417	1.90251	1.9107	1.63993	1.43782	1.46983
	18.4777	1.71873	1.41	1.65606	1.80902	1.65408	1.73953	1.63211	1.39403	1.77189	1.93346	1.88912	1.585	1.41104	1.35466	1.37771	1.66174	1.35129	1.69505	1.52215	1.6262	1.52387	1.65381	1.67254	1.71284	1.71368	1.49422	1.65671	1.77855	1.94875	1.57586	1.86538	1.63349	1.5891	1.91279	1.85125	1.93723	1.61396	1.58457	1.71403	1.4794	1.86863	1.91534	1.98638	1.89127	1.90529	1.63391	1.44201	1.46472
	18.9777	1.71832	1.43155	1.65145	1.81129	1.6385	1.73044	1.63455	1.39655	1.76859	1.93298	1.87939	1.58285	1.39778	1.35819	1.3913	1.64297	1.33431	1.68152	1.50501	1.60788	1.5184	1.63775	1.65058	1.6999	1.70132	1.4783	1.6434	1.77056	1.95193	1.5728	1.85766	1.62663	1.58503	1.90556	1.84157	1.92988	1.61477	1.57242	1.71769	1.47891	1.86642	1.91779	1.98667	1.8888	1.89218	1.63828	1.43526	1.47446
	19.4777	1.71728	1.42545	1.64663	1.80066	1.63167	1.73433	1.62364	1.39204	1.76518	1.9257	1.87208	1.58013	1.3992	1.35137	1.3724	1.6304	1.32099	1.66756	1.49264	1.59075	1.49349	1.6038	1.6206	1.69274	1.68221	1.46147	1.62733	1.76873	1.93975	1.56739	1.85433	1.62221	1.58058	1.89739	1.83727	1.92476	1.60239	1.56719	1.72146	1.48776	1.85288	1.90589	1.97943	1.88579	1.89085	1.64273	1.40613	1.46863
	19.9777	1.70758	1.41881	1.63998	1.78974	1.61735	1.72078	1.62215	1.39283	1.75887	1.91981	1.86179	1.57631	1.41534	1.35322	1.36687	1.61562	1.31018	1.65739	1.47742	1.57141	1.49737	1.57904	1.59226	1.68131	1.66724	1.44824	1.62131	1.77253	1.93897	1.56651	1.84922	1.61618	1.57421	1.90064	1.83268	1.91678	1.57386	1.54885	1.70473	1.47476	1.84558	1.90084	1.97543	1.87886	1.87969	1.62305	1.44043	1.46378
	20.4777	1.72209	1.40476	1.62777	1.78827	1.61508	1.71994	1.62911	1.38673	1.75828	1.91902	1.85653	1.57814	1.36408	1.3431	1.34238	1.5966	1.29744	1.64066	1.46201	1.5724	1.50314	1.56075	1.57344	1.67484	1.6555	1.42984	1.61321	1.76696	1.93206	1.56113	1.8497	1.61179	1.56967	1.89365	1.81808	1.90659	1.56566	1.55236	1.70365	1.4943	1.83655	1.90043	1.97021	1.87197	1.8686	1.63203	1.43158	1.44861
	20.9777	1.70249	1.42116	1.61616	1.78192	1.60341	1.70679	1.61827	1.37984	1.749	1.90917	1.8413	1.57157	1.3673	1.35954	1.37215	1.57603	1.29108	1.63247	1.44646	1.55692	1.49254	1.54449	1.55421	1.66304	1.64125	1.41552	1.60087	1.76708	1.9172	1.55791	1.84135	1.60723	1.56273	1.88385	1.81292	1.89917	1.55553	1.53574	1.69184	1.48326	1.82774	1.89012	1.9653	1.87382	1.86971	1.62541	1.39261	1.4414
	21.4777	1.72237	1.43018	1.61426	1.77714	1.5917	1.71406	1.62496	1.3775	1.74539	1.89999	1.8335	1.56715	1.3728	1.32183	1.34549	1.56126	1.27876	1.61617	1.43571	1.55023	1.49246	1.53183	1.53073	1.65357	1.63176	1.40484	1.59231	1.76435	1.91486	1.55327	1.84189	1.59964	1.55559	1.87914	1.8003	1.88654	1.54988	1.53062	1.71113	1.48513	1.81741	1.88429	1.95947	1.8693	1.84996	1.63474	1.39563	1.43266
	21.9777	1.69708	1.41546	1.58958	1.77914	1.57643	1.6984	1.60746	1.37884	1.73941	1.89367	1.82173	1.56258	1.36552	1.32247	1.3404	1.55073	1.26988	1.60507	1.42394	1.5393	1.48904	1.50389	1.51234	1.64517	1.61456	1.39517	1.58674	1.76748	1.91263	1.54373	1.83716	1.5911	1.54493	1.87624	1.79404	1.88262	1.5494	1.50884	1.7094	1.47758	1.80899	1.88039	1.95027	1.86473	1.8363	1.62734	1.39933	1.4329
	22.4777	1.71418	1.41381	1.59725	1.76487	1.57001	1.69397	1.61331	1.37162	1.72881	1.88535	1.81451	1.55523	1.33558	1.296	1.33042	1.53381	1.26106	1.59125	1.41049	1.51934	1.48293	1.48926	1.49337	1.63636	1.60175	1.38202	1.56822	1.76291	1.89845	1.53652	1.82785	1.58491	1.5365	1.86928	1.7787	1.87089	1.53046	1.50879	1.70193	1.46209	1.79265	1.86774	1.94626	1.86261	1.82536	1.62086	1.40742	1.43762
	22.9777	1.69078	1.40907	1.5689	1.75193	1.56193	1.69062	1.61148	1.3648	1.72859	1.87937	1.80664	1.55499	1.3559	1.28899	1.32845	1.52344	1.24909	1.57584	1.40307	1.50534	1.48074	1.47026	1.47772	1.61887	1.58876	1.3655	1.5605	1.7481	1.88242	1.53318	1.82452	1.57802	1.52901	1.86143	1.76781	1.8597	1.51298	1.49243	1.69742	1.47479	1.78068	1.86457	1.93675	1.86409	1.81195	1.62366	1.36135	1.39622
	23.4777	1.69219	1.40693	1.56632	1.7456	1.5497	1.68129	1.60788	1.36404	1.72231	1.87091	1.7953	1.54668	1.33635	1.30049	1.30128	1.50952	1.24376	1.5597	1.39279	1.50674	1.47201	1.46294	1.46397	1.61497	1.57857	1.35906	1.55479	1.75562	1.87486	1.52937	1.82029	1.57343	1.5215	1.85979	1.75513	1.8467	1.51716	1.48725	1.67565	1.46593	1.7702	1.85489	1.93471	1.85484	1.80169	1.61574	1.37423	1.41905
	23.9777	1.68071	1.41482	1.56509	1.73299	1.54573	1.67756	1.60487	1.36421	1.71916	1.86343	1.78385	1.54282	1.32253	1.30647	1.30755	1.50076	1.23004	1.54776	1.37869	1.50574	1.4675	1.44068	1.4413	1.5907	1.56482	1.34764	1.54072	1.75523	1.8623	1.51302	1.8112	1.56431	1.51282	1.85379	1.74453	1.83338	1.51494	1.49331	1.7158	1.48561	1.75479	1.84791	1.92973	1.85476	1.79146	1.61425	1.37859	1.42997
	24.4777	1.6834	1.38198	1.5288	1.72522	1.53603	1.65871	1.59679	1.35521	1.71054	1.85144	1.77502	1.53692	1.33203	1.30429	1.30407	1.49115	1.22548	1.53358	1.37306	1.48837	1.46905	1.43108	1.43595	1.58609	1.55219	1.33729	1.53502	1.74235	1.85994	1.51039	1.80321	1.556	1.50442	1.84687	1.72922	1.8215	1.4963	1.46846	1.6791	1.45473	1.73812	1.83721	1.92017	1.84694	1.76895	1.60921	1.3608	1.43004
	24.9777	1.67163	1.40269	1.54285	1.71105	1.53251	1.66555	1.59277	1.35415	1.70891	1.8488	1.76118	1.53126	1.29366	1.27688	1.30351	1.47791	1.21398	1.51921	1.36238	1.48834	1.45089	1.41586	1.4197	1.5718	1.53977	1.32668	1.52827	1.74011	1.8467	1.50647	1.80009	1.54889	1.4955	1.84189	1.71626	1.80886	1.48199	1.44779	1.65848	1.43824	1.72596	1.82515	1.91632	1.83998	1.75573	1.6045	1.36616	1.46032
	25.4777	1.66225	1.39415	1.51117	1.70439	1.51257	1.64393	1.59167	1.35114	1.70373	1.83828	1.74889	1.52357	1.29682	1.28899	1.28887	1.46784	1.20815	1.50728	1.35334	1.47192	1.44878	1.40483	1.40443	1.56134	1.53089	1.31637	1.5141	1.734	1.84016	1.49913	1.79409	1.54318	1.48845	1.83875	1.7093	1.80321	1.50057	1.47295	1.71501	1.49786	1.71756	1.82403	1.91281	1.83938	1.74707	1.60741	1.33034	1.40972
	25.9777	1.68165	1.40848	1.53247	1.68893	1.51294	1.63434	1.58725	1.35646	1.70025	1.83064	1.74114	1.5205	1.29561	1.31248	1.30373	1.4555	1.20049	1.49759	1.34397	1.44922	1.42685	1.38836	1.3913	1.55518	1.51945	1.30684	1.50663	1.74577	1.82119	1.48857	1.78587	1.53355	1.47744	1.82836	1.69553	1.78859	1.46888	1.43964	1.64874	1.4651	1.69739	1.8096	1.90777	1.82641	1.72787	1.60467	1.31627	1.40603
	26.4777	1.67364	1.4064	1.52743	1.69452	1.50937	1.64273	1.59131	1.35367	1.69807	1.8258	1.7304	1.51258	1.29386	1.27273	1.28183	1.44615	1.19496	1.48751	1.33579	1.45093	1.41324	1.38	1.37526	1.54143	1.50617	1.30133	1.49944	1.73174	1.8101	1.48268	1.78069	1.52498	1.4673	1.82233	1.68235	1.77504	1.46584	1.43407	1.64713	1.43616	1.68238	1.80217	1.89827	1.82023	1.71722	1.60035	1.35228	1.4382
	26.9777	1.65769	1.40903	1.50862	1.69151	1.48617	1.63756	1.58377	1.34632	1.69089	1.81242	1.71396	1.50756	1.27958	1.27841	1.29117	1.4397	1.18729	1.47475	1.32982	1.45637	1.39804	1.36849	1.36892	1.53234	1.49801	1.28836	1.4882	1.72797	1.79583	1.47026	1.77422	1.51461	1.45726	1.80847	1.66947	1.76161	1.47702	1.45062	1.67731	1.46643	1.66673	1.79746	1.89466	1.81237	1.702	1.60052	1.34741	1.42365
	27.4777	1.64932	1.41237	1.51583	1.67287	1.47903	1.62612	1.57961	1.34726	1.68662	1.80322	1.70733	1.49992	1.27643	1.29294	1.27827	1.4342	1.18219	1.46384	1.32402	1.4538	1.39437	1.36762	1.35484	1.52721	1.48983	1.28232	1.48687	1.72354	1.78598	1.4631	1.75731	1.50688	1.44757	1.80316	1.65704	1.7523	1.45261	1.41871	1.61807	1.41408	1.65135	1.78411	1.88153	1.8054	1.68114	1.58368	1.30121	1.41744
	27.9777	1.64762	1.38984	1.49588	1.66505	1.46703	1.61382	1.57126	1.33883	1.68049	1.79131	1.69206	1.49207	1.27756	1.28849	1.27484	1.4242	1.17606	1.45522	1.31964	1.45275	1.39024	1.35898	1.3436	1.5163	1.48556	1.28075	1.47024	1.71713	1.77693	1.45898	1.75724	1.50003	1.43747	1.7943	1.6414	1.73913	1.44924	1.40357	1.60748	1.42253	1.6345	1.77074	1.87517	1.79572	1.66233	1.57751	1.32951	1.40855
	28.4777	1.65073	1.3887	1.49414	1.65755	1.45802	1.61555	1.56783	1.33546	1.67794	1.78224	1.6811	1.4845	1.26978	1.28221	1.26364	1.4179	1.16798	1.44376	1.31336	1.44097	1.37717	1.35087	1.33755	1.50433	1.47253	1.2753	1.46897	1.70973	1.76077	1.44873	1.74279	1.49052	1.4279	1.78832	1.62843	1.72782	1.48058	1.40944	1.65151	1.44544	1.6188	1.76582	1.8679	1.79311	1.65365	1.57996	1.33748	1.41816
	28.9777	1.64579	1.41072	1.47613	1.63803	1.44157	1.60559	1.57525	1.33518	1.6707	1.77643	1.67102	1.47626	1.23559	1.27327	1.26644	1.41213	1.1625	1.42703	1.30961	1.43215	1.36389	1.35026	1.32934	1.49253	1.46369	1.26884	1.46111	1.70533	1.7494	1.43857	1.73843	1.4823	1.41749	1.77804	1.61705	1.71269	1.47011	1.39868	1.6424	1.45586	1.60914	1.75608	1.86114	1.78323	1.63439	1.57689	1.31768	1.41215
	29.4777	1.61375	1.39342	1.45956	1.61717	1.43799	1.58768	1.56492	1.32801	1.662	1.7673	1.65966	1.47276	1.26548	1.2627	1.26821	1.40653	1.16071	1.43539	1.30386	1.43436	1.35231	1.34249	1.32386	1.49072	1.45987	1.26102	1.45124	1.697	1.73825	1.43014	1.72571	1.47469	1.40907	1.76917	1.6045	1.70053	1.46389	1.38985	1.6478	1.42234	1.59038	1.73956	1.85068	1.77858	1.621	1.56748	1.30223	1.39509
	29.9777	1.61951	1.39896	1.46727	1.60327	1.42042	1.58359	1.55899	1.32215	1.65972	1.75233	1.64831	1.46808	1.24073	1.29106	1.27129	1.40551	1.15406	1.42169	1.30118	1.43325	1.34986	1.34868	1.31323	1.48194	1.45098	1.24978	1.44838	1.70057	1.72876	1.42302	1.71882	1.46597	1.40009	1.7599	1.58937	1.68947	1.45861	1.3916	1.63295	1.42613	1.57935	1.7366	1.84367	1.7783	1.61204	1.56274	1.28339	1.3706
	30.4777	1.607	1.37901	1.44891	1.58674	1.40316	1.56062	1.55266	1.31683	1.65093	1.7439	1.6352	1.45754	1.23189	1.2845	1.25669	1.39534	1.14754	1.40945	1.29694	1.42133	1.33257	1.34414	1.30303	1.47189	1.44435	1.24725	1.44153	1.69893	1.71247	1.41235	1.71017	1.45789	1.3904	1.75281	1.58036	1.67877	1.45906	1.38782	1.61124	1.39371	1.56422	1.72143	1.83455	1.76233	1.5947	1.56054	1.2839	1.36757
	30.9777	1.62234	1.39717	1.46508	1.5931	1.41048	1.56944	1.55612	1.31924	1.64803	1.72947	1.62227	1.45033	1.23333	1.26802	1.2439	1.39274	1.14253	1.40163	1.29148	1.42077	1.33133	1.34474	1.30439	1.4622	1.43494	1.2385	1.43983	1.68631	1.69735	1.403	1.70187	1.44781	1.37967	1.7426	1.57075	1.66457	1.4329	1.36489	1.56197	1.39233	1.54561	1.70674	1.82209	1.75364	1.57443	1.53686	1.27168	1.38373
	31.4777	1.58986	1.40393	1.46073	1.58442	1.40086	1.55813	1.54952	1.31897	1.64472	1.71968	1.6166	1.44282	1.24073	1.27927	1.25629	1.39356	1.1382	1.39292	1.28997	1.41906	1.31334	1.33482	1.28794	1.45588	1.43055	1.23355	1.43415	1.6856	1.69307	1.39485	1.69002	1.43821	1.36938	1.73044	1.55975	1.65267	1.41593	1.35831	1.5618	1.36577	1.53115	1.69309	1.81658	1.74085	1.55931	1.53725	1.26181	1.35147
	31.9777	1.59682	1.3891	1.4471	1.56775	1.39199	1.555	1.54821	1.31143	1.63402	1.70915	1.60303	1.43729	1.23351	1.26274	1.25681	1.38645	1.13265	1.38979	1.28554	1.4094	1.30291	1.3222	1.27923	1.45125	1.41993	1.23213	1.43309	1.69109	1.68078	1.39147	1.68168	1.42996	1.35958	1.72294	1.55323	1.64083	1.45718	1.37224	1.59671	1.37478	1.52068	1.69291	1.80898	1.73943	1.54768	1.53599	1.25781	1.33468
	32.4777	1.57556	1.39784	1.43792	1.54393	1.37934	1.53388	1.54481	1.30432	1.6301	1.70228	1.59069	1.42805	1.23486	1.28681	1.23602	1.38694	1.13067	1.38694	1.28236	1.42143	1.30033	1.32891	1.28263	1.44591	1.40919	1.22528	1.42253	1.67167	1.66053	1.37514	1.66576	1.42018	1.34781	1.71113	1.53906	1.62545	1.42718	1.35905	1.53911	1.34728	1.50558	1.67423	1.79881	1.72342	1.52894	1.52067	1.24971	1.32954
	32.9777	1.5644	1.36709	1.42745	1.52304	1.35821	1.51857	1.52938	1.29316	1.61526	1.68768	1.57982	1.42113	1.2246	1.27532	1.23385	1.3833	1.12747	1.38456	1.27934	1.42856	1.29001	1.32534	1.27305	1.4434	1.40253	1.22035	1.42349	1.67271	1.65733	1.36865	1.66279	1.41289	1.33975	1.69955	1.52953	1.61949	1.43874	1.35842	1.58299	1.392	1.49699	1.67031	1.79442	1.71724	1.52674	1.52453	1.24374	1.32968
	33.4777	1.57744	1.36642	1.43373	1.52772	1.35488	1.51384	1.53784	1.2965	1.61457	1.68281	1.57154	1.41533	1.21828	1.27592	1.22671	1.38047	1.12491	1.38753	1.27714	1.40499	1.269	1.32243	1.26807	1.44009	1.3903	1.21625	1.42472	1.66765	1.64354	1.35862	1.64947	1.40453	1.3303	1.69136	1.5192	1.60478	1.44481	1.36742	1.55724	1.37595	1.48534	1.65657	1.78566	1.70829	1.51393	1.52244	1.2656	1.37917
	33.9777	1.57844	1.36075	1.42198	1.52278	1.35658	1.50774	1.53232	1.29393	1.60514	1.66989	1.55694	1.40817	1.23706	1.30138	1.23594	1.37744	1.12313	1.3894	1.27463	1.40997	1.27104	1.3275	1.2667	1.43765	1.38649	1.21724	1.42481	1.66856	1.63406	1.35054	1.63939	1.39585	1.31844	1.68071	1.51032	1.59386	1.41952	1.34343	1.51336	1.32281	1.46798	1.64163	1.77316	1.69811	1.49364	1.50373	1.24721	1.34832
	34.4777	1.54216	1.35765	1.40168	1.49966	1.34411	1.49984	1.51761	1.28822	1.59426	1.66181	1.54893	1.40088	1.23315	1.28746	1.25375	1.37247	1.12011	1.38946	1.27005	1.4049	1.26663	1.32237	1.25734	1.43001	1.37679	1.21326	1.42279	1.66529	1.62361	1.34196	1.63082	1.38917	1.31054	1.67086	1.50046	1.58372	1.42489	1.35129	1.54603	1.35063	1.45672	1.63853	1.76652	1.69021	1.48844	1.50473	1.26219	1.39113
	34.9777	1.55412	1.36175	1.41872	1.47648	1.32933	1.49325	1.52417	1.28467	1.58588	1.65635	1.53784	1.3968	1.22778	1.27348	1.22059	1.36936	1.11573	1.3872	1.26817	1.40189	1.24877	1.31838	1.25311	1.42733	1.3642	1.21223	1.42913	1.6567	1.61578	1.32673	1.62245	1.3768	1.30059	1.66113	1.48859	1.57509	1.42509	1.3489	1.54485	1.35052	1.44719	1.6214	1.755	1.68934	1.47505	1.50186	1.22771	1.34308
	35.4777	1.56663	1.36331	1.41156	1.47588	1.32928	1.48095	1.51457	1.28274	1.57994	1.6484	1.52884	1.38706	1.21803	1.29165	1.23354	1.36735	1.11288	1.38714	1.26596	1.39897	1.24616	1.31751	1.247	1.42238	1.35847	1.2075	1.42135	1.67304	1.60355	1.31953	1.61555	1.36982	1.29109	1.65097	1.47943	1.567	1.40649	1.32635	1.51288	1.32517	1.434	1.61693	1.74817	1.6772	1.45874	1.49234	1.25254	1.37794
	35.9777	1.56583	1.39517	1.43955	1.49367	1.32776	1.48535	1.51942	1.28661	1.57021	1.63734	1.5197	1.38411	1.20901	1.2658	1.2247	1.36517	1.11174	1.3878	1.26143	1.39727	1.24131	1.31831	1.24087	1.41856	1.34737	1.20369	1.42444	1.66021	1.60141	1.30947	1.60803	1.36007	1.28452	1.64113	1.47017	1.55896	1.42844	1.34667	1.54612	1.3722	1.42584	1.61102	1.73795	1.66917	1.44863	1.48924	1.23936	1.35573
	36.4777	1.5292	1.37666	1.41461	1.45221	1.30926	1.46342	1.50702	1.27717	1.5561	1.63235	1.51176	1.37562	1.22373	1.28264	1.237	1.35794	1.1063	1.38634	1.25945	1.39644	1.23809	1.32132	1.2371	1.4116	1.33996	1.19858	1.42197	1.66634	1.59231	1.30159	1.59575	1.35315	1.27407	1.63608	1.46412	1.54886	1.38236	1.32532	1.47407	1.29712	1.41034	1.59526	1.73016	1.65119	1.43061	1.47043	1.23585	1.36278
	36.9777	1.50522	1.34654	1.38964	1.43459	1.293	1.44955	1.49336	1.27241	1.54711	1.61599	1.4995	1.3669	1.21184	1.27253	1.24567	1.35721	1.10424	1.38448	1.25573	1.36103	1.22806	1.31924	1.2309	1.40596	1.33193	1.199	1.41901	1.66234	1.58718	1.29274	1.59239	1.34439	1.26666	1.62941	1.45968	1.54439	1.40314	1.33578	1.50333	1.3482	1.40526	1.58993	1.72229	1.64767	1.42354	1.47046	1.24154	1.37986
	37.4777	1.51371	1.3532	1.38985	1.44359	1.28989	1.44963	1.50487	1.2693	1.53796	1.6068	1.4935	1.36479	1.20293	1.26074	1.22506	1.35175	1.10246	1.38217	1.25271	1.39653	1.22882	1.32023	1.22691	1.39774	1.3247	1.19614	1.42213	1.65449	1.57332	1.2837	1.57759	1.33764	1.25904	1.61847	1.45225	1.53289	1.38385	1.32968	1.49352	1.32933	1.39094	1.58	1.7151	1.63955	1.41758	1.45995	1.24569	1.3644
	37.9777	1.51341	1.34205	1.39786	1.42935	1.29052	1.44154	1.49619	1.26227	1.53111	1.6067	1.48609	1.35648	1.20131	1.27009	1.21345	1.35709	1.09993	1.38176	1.25156	1.3812	1.2265	1.31456	1.22503	1.40061	1.31721	1.19943	1.42444	1.66009	1.56893	1.27694	1.57333	1.32655	1.24963	1.60895	1.44671	1.52836	1.38868	1.32808	1.48341	1.32806	1.38293	1.57054	1.70757	1.6338	1.40378	1.45331	1.23866	1.37757
	38.4777	1.51555	1.3564	1.4014	1.41207	1.27966	1.42679	1.49062	1.2624	1.52078	1.60176	1.47766	1.352	1.20864	1.27162	1.21984	1.35625	1.09679	1.38067	1.25106	1.38629	1.21442	1.31784	1.22496	1.39351	1.30856	1.1987	1.42466	1.66221	1.56128	1.26666	1.56352	1.31903	1.24312	1.59933	1.43821	1.51992	1.38311	1.3266	1.46663	1.29246	1.37186	1.55695	1.69753	1.62137	1.38954	1.44506	1.23344	1.32653
	38.9777	1.50709	1.35876	1.3871	1.4097	1.27239	1.41946	1.49166	1.25802	1.50902	1.59484	1.46968	1.34334	1.20823	1.27785	1.22404	1.35585	1.09449	1.37944	1.24701	1.37239	1.22018	1.31979	1.21129	1.39214	1.30661	1.1943	1.42004	1.64024	1.549	1.25968	1.55435	1.31078	1.23524	1.58999	1.43763	1.51275	1.38864	1.32499	1.47494	1.30969	1.36154	1.55529	1.6923	1.62051	1.3827	1.43693	1.23097	1.34932
	39.4777	1.489	1.35103	1.3746	1.40071	1.27231	1.42102	1.48481	1.25273	1.50117	1.58577	1.46186	1.3402	1.21455	1.27721	1.24253	1.35694	1.09269	1.37525	1.24514	1.38115	1.2124	1.33132	1.21257	1.38798	1.29883	1.19555	1.42453	1.64717	1.54303	1.24917	1.54465	1.30254	1.22885	1.58274	1.42777	1.50712	1.3781	1.33101	1.47591	1.31773	1.351	1.54657	1.68456	1.61993	1.37362	1.43652	1.23979	1.3374
	39.9777	1.46904	1.33087	1.3712	1.37956	1.26157	1.4075	1.47964	1.25028	1.49487	1.57499	1.4503	1.33358	1.19831	1.26036	1.22335	1.35405	1.09095	1.3719	1.24233	1.36749	1.2054	1.3199	1.20846	1.3853	1.29239	1.18953	1.42436	1.63675	1.53795	1.24017	1.53964	1.29604	1.22158	1.57587	1.42569	1.49851	1.37136	1.32002	1.45338	1.31631	1.34184	1.53801	1.67761	1.60363	1.36772	1.4233	1.23057	1.31704
	40.4777	1.47954	1.37031	1.37333	1.3929	1.25926	1.40639	1.47167	1.24514	1.48634	1.56745	1.44821	1.32805	1.19201	1.26372	1.2307	1.35287	1.08757	1.3691	1.24547	1.35516	1.21159	1.32499	1.20239	1.3816	1.28311	1.19128	1.42346	1.63488	1.53756	1.23271	1.52921	1.28731	1.21579	1.56684	1.42438	1.49459	1.3512	1.31568	1.44541	1.29366	1.3294	1.52439	1.66839	1.5922	1.36034	1.42234	1.20555	1.33805
	40.9777	1.46727	1.35213	1.36534	1.3625	1.25381	1.40015	1.46829	1.23893	1.47416	1.56224	1.44226	1.32284	1.20934	1.27224	1.23426	1.35334	1.08919	1.37418	1.2414	1.36674	1.20755	1.3336	1.20536	1.37974	1.2799	1.18905	1.42128	1.65385	1.53759	1.2275	1.52006	1.28324	1.21103	1.56134	1.42111	1.48867	1.36833	1.31899	1.46133	1.30511	1.3225	1.52282	1.66387	1.58583	1.35367	1.41828	1.24281	1.32673
	41.4777	1.4657	1.33501	1.37213	1.351	1.24344	1.37762	1.45695	1.23412	1.46399	1.55765	1.43538	1.31748	1.18628	1.27302	1.22165	1.34876	1.08549	1.36999	1.2384	1.35998	1.20546	1.32979	1.19752	1.37946	1.27294	1.18496	1.42163	1.64915	1.53427	1.21543	1.5134	1.27236	1.20271	1.55167	1.41578	1.48141	1.35053	1.31785	1.44262	1.30224	1.31298	1.51264	1.65725	1.58167	1.3449	1.41114	1.22291	1.31318
	41.9777	1.46962	1.33636	1.37234	1.35941	1.24066	1.37959	1.45266	1.23426	1.46004	1.54894	1.43358	1.31285	1.20095	1.27312	1.23252	1.35317	1.08108	1.36655	1.23588	1.36434	1.20894	1.32377	1.19345	1.38058	1.26278	1.18103	1.42446	1.64419	1.52079	1.20739	1.50383	1.2643	1.19571	1.54403	1.40933	1.47423	1.35156	1.31354	1.43313	1.28929	1.30345	1.50418	1.64968	1.5715	1.33645	1.40262	1.19807	1.31572
		1.46525	1.34348	1.36212	1.35662	1.23375	1.3721	1.46063	1.22717	1.45176	1.5422	1.42708	1.30563	1.18785	1.27466	1.22919	1.34909	1.08268	1.36326	1.2349	1.35004	1.19699	1.32737	1.19535	1.38503	1.26327	1.17963	1.4262	1.64853	1.5259	1.20412	1.50198	1.261	1.19152	1.53723	1.40672	1.47081	1.34707	1.30993	1.42732	1.28018	1.29594	1.50068	1.64309	1.56092	1.33133	1.39355	1.22259	1.31471
[truncated: 52 more columns]

## Sheet: Figure 1D
	pmEKAR4 + EGF only
	Time (min)	Cell 1	Cell 2	Cell 3	Cell 4	Cell 5	Cell 6	Cell 7	Cell 8	Cell 9	Cell 10	Cell 11	Cell 12	Cell 13	Cell 14	Cell 15	Cell 16	Cell 17	Cell 18	Cell 19	Cell 20	Cell 21	Cell 22	Cell 23	Cell 24	Cell 25	Cell 26	Cell 27	Cell 28	Cell 29	Cell 30	Cell 31	Cell 32	Cell 33	Cell 34	Cell 35	Cell 36	Cell 37	Cell 38	Cell 39	Cell 40	Cell 41	Cell 42	Cell 43	Cell 44	Cell 45	Cell 46	Cell 47	Cell 48
	-3.90488	0.964586	0.978738	0.981296	0.995923	0.991561	0.983573	1.00798	1.00045	1.00194	0.986379	0.997816	1.00161	0.991398	0.958432	0.952615	0.971043	0.98014	0.972535	0.986581	0.975199	0.993288	1.00363	0.991891	1.01138	1.00107	1.0033	1.0094	1.00884	1.01518	1.00745	1.00184	1.0065	1.00876	1.00888	1.01145	1.01135	1.00649	0.976667	1.00778	1.00043	0.997881	0.991961	1.00639	1.00516	1.00305	0.973554	1.01076	1.02018
	-3.40488	0.968403	0.966059	0.986049	1.00399	1.00496	0.989269	1.00699	1.00528	1.00527	0.989588	0.998879	0.999857	0.998642	0.962138	0.967959	0.974854	0.985595	0.972753	0.993775	0.978337	0.993001	0.968026	0.989342	1.00444	0.997913	0.997061	1.00848	1.0064	1.01428	1.00776	1.00056	1.00053	1.00885	1.00689	1.01017	1.01091	1.00912	0.971207	1.0068	0.999463	1.00224	1.00228	0.999697	1.00262	1.00436	0.976954	1.01156	1.0229
	-2.90488										0.992058	0.997734	1.00081	1.00496	0.976689	0.990591	0.987172	0.990917	0.986719	1.0065	0.985817	0.99804	0.985299	0.986759	1.00541	0.997186	0.999153	1.00657	1.00693	1.00911	1.01362	1.00231	1.00154	1.0096	1.00314	1.0119	1.00831	1.00402	0.976661	1.0051	0.999748	1.00002	0.999866	1.0043	1.00332	1.00393	0.979038	1.00994	1.01599
	-2.40488										0.993559	1.00083	1.00224	1.00188	0.983874	0.967081	0.984383	0.993973	0.987664	1.00231	0.992226	0.996674	0.98918	0.990143	1.00973	0.998401	1.00206	1.00844	0.996544	1.01515	1.00942	0.998749	1.00189	1.00793	1.00641	1.01116	1.00821	1.00641	0.979555	1.00217	0.99956	1.01111	1.00586	1.00689	1.00828	1.00363	0.985522	1.01149	1.01733
	-1.95998	0.996762	0.985475	0.989877	1.02342	0.996694	0.994175	1.00771	1.00795	1.00751	1.00571	1.00419	1.00673	1.00971	0.976908	0.98466	0.996135	0.999851	0.988302	1.00243	0.991637	1.00055	0.977049	0.99724	1.00958	0.995945	0.997729	1.00713	1.00511	1.01128	1.0056	0.999303	0.998497	1.00792	1.006	1.01022	1.0073	1.00548	0.961769	0.999715	0.997627	1.00527	1.00709	1.00361	1.00641	1.00542	0.986428	1.00749	1.01008
	-1.47133	0.984643	0.986548	0.990857	1.01444	0.99794	1.00288	1.00913	1.00721	1.00968					0.984765	0.974574	0.981917	1.00004	0.987276	0.999271	0.991752	1.00121	0.992513	0.99688	1.01085	1.00027	1.00003	1.00669	1.01772	1.01492	1.01596	1.00345	1.01075	1.00924	1.00874	1.01213	1.00865	1.01158	0.980966	1.00533	1.00122	1.00324	1.00401	1.00146	1.0044	1.00298	0.992018	1.01056	1.00937
EGF addition	0	1	1	1	1	1	1	1	1	1	1	1	1	1	1	1	1	1	1	1	1	1	1	1	1	1	1	1	1	1	1	1	1	1	1	1	1	1	1	1	1	1	1	1	1	1	1	1	1
	0.479533	1.01456	0.989591	0.999235	1.00748	1.00605	0.99641	0.998635	0.996591	0.996275	0.998892	0.997071	0.99532	1.00995	0.993757	0.998235	1.0164	0.996516	0.993533	0.999829	0.999571	0.995235	0.988673	0.990186	0.997709	0.994364	0.99289	0.994187	0.999057	1.00152	1.0068	0.995309	0.99423	0.996145	0.993041	0.99163	0.994744	0.99884	0.996732	0.998148	0.995499	1.00294	0.995822	1.0137	1.00458	1.00137	1.00396	1.00346	0.994025
	0.979533	1.00521	0.980239	0.988167	1.01684	0.996954	0.999617	0.998139	1.00145	0.998449	1.00276	0.99943	0.99695	1.00811	0.993551	0.979493	1.01965	1.00003	0.989075	0.996341	1.00183	0.993712	0.978925	0.993191	0.99438	0.99152	0.992716	0.987974	0.989534	0.993546	1.00557	0.999567	0.987518	0.993043	0.990977	0.993061	0.991253	0.991459	0.996432	0.995671	0.994446	1.01189	1.0017	1.01211	1.00145	0.998328	1.00213	1.00053	0.991192
	1.47953	0.978194	0.970208	0.994484	1.00624	0.994185	0.998355	0.996418	0.999157	0.996621	0.993679	0.997935	0.99528	1.00719	0.999792	1.00401	1.01264	0.998076	0.994335	1.00309	1.00503	0.993576	0.993839	0.991143	1.00279	0.988607	0.995595	0.984614	1.00219	1.00179	1.01505	1.00304	0.993102	0.993396	0.993117	0.995221	0.991093	0.989378	0.9902	0.992122	0.991295	1.01322	1.00968	1.00857	0.996498	0.994398	1.00398	0.991239	0.992773
	1.97953	1.0054	0.989234	0.999644	1.02355	1.00678	1.00493	0.995202	1.00043	1.00314	1.00347	1.00935	1.00326	1.03039	1.01386	1.00243	1.0207	0.996963	0.992416	1.0028	1.01183	0.994317	1.00635	1.0012	1.03016	0.987967	0.998331	0.985435	1.04948	1.04149	1.05335	1.02465	1.01334	0.997697	0.998044	0.998355	0.996068	0.992186	0.994405	0.995236	0.991135	0.994394	0.975711	0.995957	0.987035	0.98489	0.998934	0.997755	0.98781
	2.47953	0.981531	0.986161	0.992805	1.02794	0.999727	1.0042	0.998719	1.00184	1.0012	1.01517	1.05375	1.02498	1.06871	1.00173	1.00725	1.00957	0.997864	0.995805	1.00191	1.0123	0.996424	1.02231	1.01195	1.08454	0.987795	0.999179	0.986057	1.14973	1.13814	1.12159	1.0686	1.06752	1.01022	1.0281	1.00569	1.00511	0.992115	1.00154	1.00258	0.99167	1.01757	1.00391	1.02146	0.994944	0.989496	1.00272	1.01204	1.00229
	2.97953	1.01049	0.99708	0.992982	1.0464	1.01794	1.00526	0.999461	1.00463	1.00346	1.0458	1.1307	1.08715	1.12467	0.999105	1.02262	1.01511	1.00021	0.995693	1.00126	1.01231	0.998065	1.04451	1.0223	1.16119	0.99467	1.01005	0.98653	1.21412	1.22439	1.15453	1.1168	1.11436	1.02283	1.0846	1.01179	1.01667	0.991606	1.01169	1.00491	0.994085	1.02181	1.02108	1.03787	0.996533	0.986668	1.00451	1.05731	1.03055
	3.47953	1.01837	0.995429	0.99827	1.05669	1.05118	1.00747	0.999203	1.0067	1.00526	1.10245	1.21058	1.17735	1.16573	1.00679	1.0544	1.02178	0.999953	0.994727	1.01056	1.02345	1.00144	1.10687	1.04323	1.22959	1.00314	1.02903	0.990087	1.25007	1.26545	1.17277	1.1369	1.14534	1.04205	1.14889	1.01856	1.02747	0.991777	1.0454	1.02172	1.00776	1.06342	1.05999	1.09293	1.00011	0.993218	1.00705	1.10403	1.07149
	3.97953	1.04306	1.0083	1.00499	1.08909	1.05143	1.01001	1.00019	1.01389	1.01198	1.1639	1.29202	1.25856	1.21686	1.00015	1.08618	1.02817	0.998891	1.00228	1.02551	1.03325	1.00353	1.13414	1.09155	1.27577	1.0334	1.06278	0.992399	1.25688	1.28587	1.18124	1.15201	1.15774	1.06359	1.19527	1.0293	1.05007	0.992276	1.08063	1.04676	1.03212	1.10835	1.09639	1.17812	1.01707	1.00545	1.01348	1.1551	1.13282
	4.47953	1.0767	1.00092	0.998254	1.1132	1.07146	1.01581	0.998853	1.01762	1.0157	1.21362	1.332	1.30047	1.24877	0.968808	1.07617	0.993065	0.990621	1.00218	1.01534	1.0265	1.00501	1.16229	1.11837	1.28553	1.06628	1.10111	1.00226	1.25862	1.28913	1.1971	1.16683	1.16769	1.08204	1.21256	1.04291	1.0828	0.997907	1.10227	1.07641	1.0659	1.12827	1.11934	1.21824	1.03157	1.02996	1.01943	1.19589	1.20678
	4.97953	1.07867	1.01125	1.00976	1.13633	1.09755	1.01886	0.998211	1.02823	1.02498	1.24083	1.35295	1.31299	1.24779	1.01419	1.15202	1.03352	1.00884	1.02547	1.06695	1.05744	1.01876	1.16188	1.14695	1.2941	1.11491	1.14512	1.01193	1.25944	1.29324	1.20648	1.18892	1.17786	1.09849	1.21665	1.05811	1.12369	1.0048	1.14573	1.1133	1.10503	1.13644	1.1187	1.2393	1.05963	1.06736	1.03837	1.20779	1.26031
	5.47953	1.12268	1.01198	1.00767	1.17011	1.10708	1.03035	1.00062	1.04055	1.03879	1.2525	1.35653	1.31693	1.2603	1.02837	1.1618	1.05359	1.02379	1.03922	1.08971	1.06974	1.02996	1.1552	1.15055	1.29196	1.16473	1.19825	1.03171	1.25687	1.29657	1.21108	1.19981	1.21224	1.11407	1.22014	1.07831	1.16544	1.01391	1.14912	1.14068	1.14107	1.13615	1.13383	1.24213	1.09027	1.11079	1.06623	1.2153	1.29063
	5.97953	1.12173	1.03312	1.01704	1.1966	1.12984	1.03805	1.00405	1.05968	1.05931	1.27981	1.37801	1.32747	1.27951	1.02475	1.17989	1.04526	1.03583	1.04507	1.13191	1.09366	1.04638	1.1707	1.15913	1.29071	1.20644	1.23704	1.04912	1.25745	1.30178	1.21473	1.22139	1.23107	1.12736	1.2256	1.10278	1.20703	1.02818	1.15478	1.16297	1.16703	1.14845	1.12577	1.24022	1.13111	1.14688	1.09428	1.21518	1.3108
	6.47953	1.13316	1.02867	1.02739	1.22229	1.13047	1.04754	1.00225	1.08135	1.08325	1.27288	1.37281	1.32006	1.26962	1.01636	1.18533	1.03266	1.04179	1.0541	1.15214	1.10668	1.05858	1.14215	1.15364	1.28569	1.23214	1.27205	1.07222	1.26175	1.30712	1.22096	1.22905	1.25108	1.13457	1.2352	1.13277	1.24213	1.0446	1.16264	1.17617	1.18339	1.15011	1.12771	1.24322	1.1644	1.17032	1.11477	1.21566	1.31846
	6.97953	1.11906	1.04526	1.01882	1.23401	1.13536	1.05397	1.00123	1.10142	1.10931	1.27576	1.38267	1.32453	1.27512	1.03486	1.18028	1.02613	1.05625	1.0711	1.18464	1.12883	1.08407	1.18399	1.16198	1.28843	1.25832	1.29941	1.09854	1.25456	1.31221	1.2212	1.23594	1.26456	1.14203	1.24019	1.15928	1.27071	1.06146	1.15578	1.18435	1.19114	1.15905	1.1363	1.24899	1.19097	1.18215	1.13049	1.21649	1.32155
	7.47953	1.10824	1.05773	1.03212	1.24208	1.14506	1.06268	1.00342	1.12289	1.1379	1.28429	1.38066	1.32435	1.28457	1.1049	1.22347	1.06797	1.09693	1.10554	1.23651	1.15691	1.11181	1.16533	1.1508	1.2854	1.26925	1.30931	1.12332	1.26838	1.30902	1.23247	1.2539	1.27064	1.15149	1.24265	1.1884	1.29066	1.07586	1.15252	1.19019	1.19566	1.16343	1.13537	1.25363	1.20652	1.18734	1.14166	1.21248	1.31906
	7.97953	1.13714	1.05619	1.03598	1.25963	1.13521	1.06961	1.00322	1.1428	1.1632	1.2819	1.38584	1.33027	1.28229	1.0784	1.1835	1.04692	1.1054	1.1031	1.23578	1.16839	1.13295	1.13711	1.16379	1.28414	1.27576	1.32819	1.14621	1.26198	1.31751	1.23249	1.25193	1.27313	1.15393	1.24619	1.21477	1.30488	1.09541	1.15356	1.19535	1.19644	1.15762	1.12479	1.24694	1.21398	1.18367	1.14227	1.2162	1.32113
	8.47954	1.14388	1.05629	1.04174	1.26094	1.14031	1.08083	1.00421	1.16187	1.18548	1.28643	1.37906	1.33077	1.28096	1.12556	1.24753	1.06203	1.13719	1.13114	1.28945	1.19118	1.15845	1.15639	1.15014	1.29055	1.28236	1.33507	1.17162	1.26341	1.31565	1.23444	1.25398	1.27534	1.1513	1.24941	1.23382	1.31355	1.10642				1.18059	1.15205	1.2511	1.22878	1.18825	1.14286	1.21622	1.32087
	8.97953	1.13959	1.07308	1.03795	1.28239	1.15813	1.08325	1.00584	1.17937	1.20306	1.27382	1.37545	1.31917	1.26382	1.11962	1.19927	1.05357	1.14861	1.13103	1.27931	1.1997	1.17609	1.18582	1.17349	1.29088	1.28604	1.33853	1.19099	1.27631	1.31554	1.23421	1.26372	1.28616	1.15821	1.25578	1.25243	1.31968	1.12176	1.14431	1.19749	1.19993	1.17234	1.1262	1.25448	1.22348	1.18597	1.14533	1.21932	1.32584
	9.47953	1.15567	1.07464	1.04627	1.27994	1.14747	1.08997	1.00536	1.19668	1.22486	1.28849	1.38846	1.33313	1.27942	1.13835	1.20276	1.0587	1.15702	1.14646	1.28159	1.21276	1.19171	1.14856	1.14785	1.27775	1.28571	1.34394	1.21198	1.27076	1.31682	1.24047	1.26208	1.28795	1.15795	1.2618	1.26668	1.32525	1.13304	1.1501	1.19531	1.1966	1.17008	1.13158	1.25797	1.23036	1.18704	1.14229	1.21288	1.32596
	9.97953	1.15427	1.10083	1.05359	1.28233	1.15583	1.09968	1.00729	1.20802	1.23083	1.28484	1.38077	1.32789	1.27663	1.1476	1.20835	1.06661	1.17253	1.15039	1.29723	1.22442	1.21021	1.17334	1.16083	1.27793	1.28622	1.34613	1.22572	1.26375	1.31737	1.2381	1.25706	1.29138	1.16045	1.26104	1.27766	1.3232	1.13968	1.16007	1.19466	1.19828	1.18946	1.14201	1.25977	1.2334	1.18974	1.14415	1.2225	1.32031
	10.4795	1.15395	1.09291	1.04717	1.29862	1.15414	1.10305	1.00773	1.21384	1.2366	1.27239	1.3779	1.32365	1.2747	1.17502	1.25159	1.09189	1.20211	1.16571	1.33512	1.24031	1.2254	1.1394	1.14963	1.27354	1.2945	1.34168	1.24154	1.27997	1.32214	1.24396	1.2647	1.29195	1.15975	1.26582	1.28792	1.32498	1.14896	1.15373	1.19626	1.19646	1.19205	1.14158	1.26633	1.23001	1.18821	1.1445	1.22326	1.31942
	10.9795	1.16382	1.10608	1.04687	1.29009	1.15513	1.10633	1.00778	1.21809	1.24164	1.27904	1.37139	1.32459	1.27446	1.17153	1.20627	1.07128	1.1874	1.15982	1.30077	1.23611	1.22839	1.12987	1.1464	1.27697	1.27954	1.35032	1.25121	1.2713	1.31844	1.23969	1.26465	1.29031	1.15881	1.26275	1.29705	1.32754	1.15685	1.1592	1.19287	1.19646	1.17259	1.13057	1.25183	1.22561	1.18545	1.14235	1.21731	1.3232
	11.4795	1.15872	1.13061	1.05471	1.30011	1.17613	1.10913	1.00878	1.22767	1.24675	1.27674	1.36305	1.32582	1.27264	1.1583	1.21129	1.06056	1.18706	1.16061	1.3109	1.24012	1.23311	1.16995	1.15492	1.27384	1.28709	1.35491	1.26251	1.26806	1.31719	1.23748	1.26629	1.29115	1.1603	1.26744	1.30163	1.33157	1.16165	1.157	1.19844	1.19736	1.18497	1.13749	1.25911	1.22823	1.18879	1.13927	1.21824	1.32766
	11.9795	1.16747	1.12307	1.0549	1.30071	1.1648	1.11461	1.00788	1.23175	1.24823	1.27682	1.36993	1.32505	1.27967	1.20584	1.24284	1.10349	1.20876	1.17502	1.34173	1.25658	1.24447	1.20051	1.15883	1.28061	1.29047	1.36105	1.27105	1.27957	1.32509	1.24379	1.26224	1.29265	1.16645	1.26984	1.30506	1.33161	1.1667	1.15347	1.19864	1.19641	1.18246	1.13448	1.25913	1.22725	1.18576	1.14046	1.21796	1.32278
	12.4795	1.14385	1.12069	1.05619	1.28404	1.15943	1.1153	1.00979	1.23405	1.24943	1.27511	1.37032	1.32369	1.27549	1.18192	1.20431	1.0613	1.20097	1.1661	1.31224	1.24386	1.2435	1.14848	1.1546	1.27561	1.28615	1.35561	1.27832	1.26802	1.32651	1.24926	1.26435	1.28844	1.15798	1.27207	1.30947	1.32898	1.1708	1.15907	1.19816	1.19925	1.19088	1.157	1.25832	1.22764	1.18703	1.14502	1.23074	1.32364
	12.9795	1.15376	1.10317	1.05837	1.29915	1.15435	1.11701	1.01283	1.2365	1.25182	1.27758	1.3713	1.32499	1.28281	1.24145	1.25136	1.10085	1.22729	1.19111	1.3387	1.26098	1.25304	1.12716	1.13427	1.28193	1.2883	1.35378	1.28324	1.27395	1.32748	1.24428	1.26518	1.29468	1.15939	1.27422	1.31174	1.32929	1.17347	1.15771	1.20033	1.19792	1.18881	1.16107	1.26276	1.2252	1.18657	1.14693	1.22809	1.32885
	13.4795	1.18266	1.12902	1.06463	1.30586	1.16755	1.12069	1.01298	1.24189	1.25172	1.2735	1.36782	1.32641	1.27823	1.20339	1.1865	1.07451	1.20856	1.18292	1.3262	1.24703	1.2479	1.1546	1.15024	1.28333	1.28749	1.35659	1.28944	1.27444	1.32457	1.24099	1.26924	1.29142	1.15748	1.27605	1.31263	1.32932	1.17519	1.16617	1.1939	1.19577	1.19524	1.14702	1.26035	1.22959	1.18375	1.14324	1.22896	1.31485
	13.9795	1.17662	1.12911	1.06081	1.29226	1.17061	1.12276	1.01182	1.24369	1.25269	1.27629	1.37214	1.32726	1.2816	1.23968	1.25153	1.10808	1.2371	1.19337	1.3462	1.26753	1.25878	1.1381	1.15081	1.28402	1.28265	1.36107	1.29568	1.26978	1.31662	1.24262	1.2658	1.29498	1.15845	1.27724	1.3149	1.32886	1.17915	1.16194	1.19352	1.19523	1.1927	1.15736	1.25985	1.22351	1.18566	1.14274	1.23267	1.32291
	14.4795	1.16779	1.14015	1.06936	1.31107	1.16913	1.11995	1.01405	1.24257	1.25436	1.28374	1.37976	1.33453	1.29942	1.24973	1.24536	1.11191	1.24132	1.19006	1.36606	1.26537	1.2614	1.17062	1.16016	1.28854	1.28566	1.36287	1.29758	1.26737	1.32752	1.24222	1.26996	1.29259	1.15713	1.27841	1.3206	1.33122	1.17954	1.15559	1.19605	1.19653	1.19311	1.16316	1.26404	1.22771	1.18505	1.14559	1.22441	1.31502
	14.9795	1.20729	1.15065	1.06911	1.30823	1.17086	1.12126	1.01906	1.24738	1.2556	1.27755	1.3673	1.32161	1.28912	1.25337	1.25124	1.11154	1.24186	1.19536	1.36644	1.26077	1.25671	1.18199	1.15523	1.29113	1.291	1.36456	1.29804	1.26774	1.32158	1.24247	1.26678	1.29371	1.15983	1.27919	1.31699	1.3297	1.18057	1.16635	1.19833	1.19895	1.18119	1.15709	1.2552	1.22371	1.18287	1.14352	1.23141	1.31703
	15.4795	1.18955	1.13646	1.06249	1.29869	1.16445	1.12625	1.01844	1.24542	1.2531	1.2755	1.37007	1.32723	1.29083	1.23205	1.21975	1.10779	1.23869	1.19573	1.37316	1.26552	1.26223	1.15538	1.1473	1.28111	1.28357	1.3607	1.30016	1.2693	1.32337	1.2368	1.2694	1.28837	1.15663	1.27592	1.31816	1.32974	1.18176	1.15627	1.19349	1.19762	1.18449	1.15064	1.25371	1.22148	1.18106	1.14353	1.23236	1.31711
	15.9795	1.17357	1.13465	1.06838	1.3027	1.17548	1.12717	1.018	1.24692	1.25427	1.26652	1.3651	1.31994	1.27437	1.25172	1.22918	1.10931	1.23945	1.19496	1.3635	1.26429	1.25873	1.17862	1.15492	1.28627	1.28849	1.36748	1.30363	1.26289	1.31962	1.23392	1.26377	1.28913	1.15674	1.27913	1.31599	1.32745	1.17776	1.16099	1.19449	1.19788	1.1854	1.15329	1.25477	1.22394	1.18206	1.14581	1.23271	1.3157
	16.4795	1.19199	1.12985	1.07353	1.30373	1.16564	1.13154	1.01951	1.24624	1.252	1.2646	1.37058	1.318	1.27479	1.20582	1.18809	1.0875	1.2152	1.18098	1.3402	1.24514	1.25408	1.15139	1.14021	1.28522	1.28386	1.35963	1.30309	1.27473	1.32379	1.23939	1.27439	1.28835	1.15508	1.28116	1.3175	1.33089	1.1821	1.167	1.19947	1.19709	1.17711	1.14997	1.25508	1.2233	1.18045	1.14376	1.22869	1.31845
	16.9795	1.16473	1.15181	1.07332	1.29679	1.16585	1.12241	1.01958	1.24776	1.25227	1.27505	1.37538	1.3255	1.2894	1.25647	1.21617	1.10166	1.2452	1.19367	1.35837	1.25674	1.25989	1.18506	1.149	1.28604	1.28379	1.35553	1.30458	1.26792	1.31873	1.23853	1.26631	1.28649	1.15303	1.28145	1.31741	1.32863	1.1796	1.16047	1.1937	1.19654	1.16857	1.14815	1.25097	1.22318	1.17706	1.14486	1.2316	1.31428
	17.4795	1.19278	1.15073	1.07129	1.31695	1.17077	1.12477	1.02289	1.24704	1.2531	1.26694	1.37175	1.32616	1.29287	1.2675	1.21968	1.11145	1.25135	1.19618	1.3567	1.266	1.26291	1.18013	1.14757	1.29411	1.2812	1.36133	1.30574	1.26334	1.31617	1.23977	1.26654	1.28464	1.15254	1.2797	1.3183	1.32771	1.17917	1.16333	1.19439	1.1974	1.18401	1.16118	1.25612	1.22413	1.17862	1.14576	1.23595	1.31505
	17.9795	1.17404	1.14531	1.06767	1.3081	1.17144	1.12328	1.02302	1.24858	1.25355	1.27374	1.37125	1.32817	1.28404	1.22319	1.16564	1.07578	1.22485	1.1838	1.32885	1.25253	1.25678	1.17254	1.14616	1.29528	1.28357	1.36742	1.30804	1.26323	1.322	1.23277	1.26377	1.27919	1.15208	1.28361	1.32398	1.33078	1.18091	1.15643	1.18998	1.19637	1.18506	1.17082	1.25806	1.22483	1.17647	1.14888	1.23555	1.31595
	18.4795	1.16658	1.1403	1.07463	1.30094	1.15956	1.12396	1.0249	1.24821	1.25101	1.26351	1.37283	1.32242	1.27584	1.2055	1.16619	1.09002	1.22724	1.1831	1.32951	1.24802	1.25868	1.18363	1.1495	1.29656	1.28829	1.36343	1.30727	1.2589	1.31245	1.22658	1.26539	1.28154	1.14974	1.28199	1.32153	1.32868	1.18109	1.16556	1.19036	1.19401	1.16518	1.1522	1.25239	1.22021	1.17538	1.14825	1.23636	1.31539
	18.9795	1.21119	1.1601	1.07188	1.3092	1.16903	1.12508	1.02378	1.25065	1.25235	1.26681	1.36904	1.31938	1.28819	1.25427	1.21217	1.11337	1.24366	1.20087	1.34919	1.25701	1.26133	1.18493	1.15079	1.29424	1.2858	1.36451	1.30764	1.26287	1.31655	1.23205	1.27325	1.28402	1.14481	1.28027	1.31675	1.32866	1.18104	1.16238	1.19173	1.1944	1.15742	1.1452	1.24823	1.22107	1.17314	1.14153	1.23174	1.31707
	19.4795	1.18626	1.16833	1.08197	1.31873	1.17797	1.12605	1.02741	1.25266	1.25305	1.25892	1.36683	1.3204	1.27824	1.22069	1.19089	1.09005	1.22535	1.18479	1.32887	1.2482	1.25549	1.18824	1.15149	1.29672	1.28147	1.36209	1.30821	1.25526	1.31397	1.22564	1.263	1.28119	1.14485	1.28147	1.31872	1.32856	1.17791	1.15999	1.19116	1.19693	1.17012	1.16222	1.26201	1.22369	1.17355	1.1462	1.23209	1.31544
	19.9795	1.19145	1.16189	1.08212	1.31337	1.16773	1.12603	1.02855	1.25182	1.25204	1.26722	1.36894	1.32331	1.2868	1.25095	1.22348	1.11996	1.25207	1.19843	1.36184	1.26523	1.26252	1.20236	1.15823	1.29364	1.28582	1.35938	1.31033	1.25593	1.30124	1.22498	1.26377	1.27844	1.14306	1.28507	1.32128	1.32429	1.17966	1.15409	1.18779	1.19515	1.17349	1.16346	1.25789	1.22504	1.17748	1.14832	1.23106	1.3129
	20.4795	1.18959	1.17063	1.08676	1.30696	1.15603	1.12379	1.02999	1.24854	1.25048	1.26283	1.36887	1.31819	1.28571	1.26678	1.22469	1.13217	1.24668	1.19593	1.36744	1.26361	1.26601	1.16822	1.15764	1.29371	1.28036	1.35729	1.31083	1.25176	1.30423	1.22794	1.26295	1.27596	1.14326	1.28358	1.31951	1.32636	1.1813	1.15576	1.18837	1.19322	1.15566	1.14785	1.25133	1.22067	1.17008	1.14242	1.22032	1.30096
	20.9795	1.20272	1.15148	1.07989	1.30934	1.15622	1.12756	1.02956	1.24677	1.24982	1.2543	1.3705	1.32116	1.28755	1.2583	1.22816	1.1304	1.25841	1.20459	1.36763	1.26247	1.26694	1.15051	1.13957	1.2906	1.28365	1.36013	1.31036	1.25571	1.30722	1.22357	1.25819	1.28358	1.14008	1.2827	1.32062	1.32492	1.17848	1.165	1.1868	1.19461	1.16082	1.15246	1.24881	1.21902	1.16966	1.14801	1.22729	1.30644
	21.4795	1.19403	1.16017	1.09185	1.30911	1.16693	1.12447	1.03188	1.24938	1.24857	1.25542	1.36821	1.31509	1.27672	1.2668	1.22316	1.11883	1.25333	1.19572	1.35662	1.26426	1.26382	1.17301	1.14701	1.29049	1.28245	1.359	1.31062	1.25397	1.30945	1.21711	1.26434	1.27939	1.13855	1.28329	1.31912	1.32288	1.17796	1.1569	1.18566	1.19148	1.16107	1.15826	1.25281	1.21667	1.16827	1.14661	1.22888	1.29619
	21.9795	1.20127	1.14001	1.09226	1.30718	1.16745	1.12629	1.03229	1.24965	1.2502	1.25838	1.35732	1.3101	1.28211	1.23221	1.23003	1.1235	1.25226	1.19145	1.36571	1.26059	1.26615	1.16868	1.13072	1.29079	1.282	1.35808	1.30967	1.25681	1.30069	1.2196	1.26125	1.2725	1.13536	1.28306	1.3203	1.32215	1.1802	1.15736	1.19048	1.19166	1.16129	1.14826	1.24519	1.21317	1.16449	1.14501	1.22284	1.29818
	22.4795	1.17554	1.15715	1.08911	1.3006	1.17381	1.12825	1.03418	1.24612	1.24822	1.25272	1.35973	1.31325	1.28157	1.25689	1.22073	1.12628	1.25384	1.19599	1.3556	1.2592	1.26349	1.14874	1.13709	1.28539	1.27536	1.35773	1.31135	1.25588	1.29976	1.21917	1.25809	1.27043	1.13266	1.282	1.32712	1.32189	1.17581	1.15685	1.18936	1.19284	1.16793	1.15754	1.25186	1.21774	1.16557	1.14882	1.23269	1.29645
	22.9795	1.19015	1.1449	1.07835	1.30693	1.15428	1.12621	1.03415	1.24808	1.24927	1.24845	1.35363	1.31032	1.27796	1.21642	1.17983	1.10069	1.22887	1.18223	1.33792	1.25467	1.25781	1.17462	1.14406	1.29157	1.28627	1.3581	1.31046	1.25975	1.30039	1.21511	1.25346	1.26948	1.13458	1.28167	1.32209	1.32229	1.17661	1.15703	1.18425	1.19266	1.15884	1.15882	1.2414	1.21685	1.16382	1.15012	1.22498	1.29321
	23.4795	1.18987	1.13811	1.08442	1.30876	1.1667	1.12164	1.03509	1.24581	1.24751	1.24567	1.35629	1.30922	1.28128	1.2695	1.21892	1.12873	1.25743	1.20036	1.3675	1.26615	1.26299	1.14527	1.14918	1.29288	1.28731	1.35336	1.31071	1.2618	1.2964	1.21238	1.25851	1.2721	1.13166	1.28252	1.32258	1.32015	1.17643	1.15497	1.18437	1.1904	1.16326	1.15905	1.24683	1.21776	1.16012	1.14794	1.22924	1.28388
	23.9795	1.17757	1.14389	1.09415	1.2936	1.16261	1.12202	1.03765	1.24587	1.24703	1.24379	1.35283	1.30461	1.27152	1.24384	1.2123	1.12039	1.25077	1.1926	1.35412	1.25553	1.26006	1.14296	1.131	1.28789	1.27673	1.35381	1.30989	1.24593	1.29126	1.20619	1.24941	1.2676	1.13067	1.27815	1.31728	1.31926	1.17563	1.15593	1.18666	1.19017	1.14936	1.16273	1.24288	1.21513	1.15823	1.14574	1.2237	1.28207
	24.4795	1.17665	1.15242	1.08953	1.30198	1.15547	1.11951	1.03947	1.24544	1.24811	1.23875	1.3549	1.30744	1.27725	1.20979	1.16487	1.09216	1.23135	1.1838	1.32796	1.24373	1.25845	1.22913	1.15955	1.29064	1.27503	1.35319	1.3129	1.25558	1.2923	1.20543	1.25101	1.26855	1.13	1.27884	1.31886	1.31872	1.17428	1.15394	1.18577	1.19072	1.16062	1.1699	1.24595	1.2185	1.15548	1.14727	1.22873	1.28749
	24.9795	1.18828	1.15199	1.09179	1.2965	1.16657	1.11699	1.04095	1.24584	1.24715	1.23824	1.34406	1.30282	1.27695	1.20287	1.19033	1.09914	1.2277	1.18073	1.33009	1.24279	1.25688	1.19407	1.14035	1.28843	1.27812	1.35095	1.3113	1.25802	1.28977	1.20607	1.24564	1.26474	1.12793	1.27722	1.32116	1.31725	1.17477	1.16085	1.1829	1.19161	1.16032	1.15736	1.23491	1.2161	1.15392	1.1484	1.22904	1.28364
	25.4795	1.18375	1.13891	1.09054	1.29463	1.16121	1.12034	1.0453	1.24219	1.24778	1.23592	1.34654	1.30277	1.2723	1.24155	1.23482	1.12589	1.25573	1.19076	1.35993	1.25627	1.26644	1.18664	1.1393	1.28596	1.27688	1.35054	1.30936	1.25484	1.28916	1.20237	1.25019	1.26757	1.12385	1.27541	1.32081	1.31644	1.17539	1.14998	1.17959	1.19123	1.15794	1.17021	1.23977	1.21325	1.15427	1.14616	1.2197	1.27972
	25.9795	1.19402	1.14165	1.09065	1.29327	1.15978	1.11844	1.04372	1.24366	1.24441	1.2313	1.33549	1.2985	1.27135	1.2149	1.20442	1.09905	1.22578	1.17824	1.34109	1.24397	1.25712	1.18588	1.14322	1.28622	1.27072	1.34842	1.31156	1.25904	1.28221	1.20394	1.23911	1.2627	1.12552	1.27399	1.32048	1.31566	1.17596	1.15813	1.17544	1.18718	1.15728	1.16736	1.23215	1.2152	1.15155	1.14696	1.22131	1.27865
	26.4795	1.19361	1.15438	1.08997	1.2965	1.16992	1.11818	1.04507	1.24335	1.24912	1.22585	1.33389	1.29366	1.27256	1.25889	1.23861	1.13025	1.24709	1.19467	1.3467	1.25168	1.26394	1.17956	1.13532	1.28027	1.27065	1.34718	1.30914	1.25302	1.28271	1.19749	1.23707	1.2685	1.12484	1.27376	1.31789	1.31403	1.17477	1.15208	1.17673	1.1864	1.15644	1.17569	1.24019	1.21653	1.14758	1.14477	1.22121	1.27038
	26.9795	1.19875	1.14552	1.08184	1.29222	1.15139	1.11435	1.04422	1.23951	1.24261	1.22753	1.33043	1.29941	1.27293	1.22385	1.17015	1.10491	1.23881	1.1838	1.32115	1.23924	1.25923	1.18289	1.14231	1.28627	1.26741	1.34452	1.30794	1.25855	1.28189	1.19859	1.24305	1.25946	1.12275	1.26849	1.31944	1.31248	1.17235	1.14559	1.17204	1.18224	1.15852	1.18738	1.23003	1.2098	1.14685	1.14475	1.21456	1.27265
	27.4795	1.18373	1.15111	1.08929	1.29176	1.15433	1.11726	1.04775	1.24424	1.24242	1.2208	1.33357	1.29178	1.26539	1.21541	1.17021	1.09126	1.22585	1.17553	1.31631	1.24193	1.25536	1.16192	1.12872	1.27717	1.26602	1.34452	1.30834	1.26116	1.27366	1.20094	1.23951	1.26309	1.12299	1.26921	1.31955	1.30941	1.17386	1.15127	1.17785	1.18391	1.1642	1.16611	1.23681	1.21084	1.14336	1.14749	1.22362	1.27162
	27.9795	1.18471	1.13959	1.08559	1.27898	1.15626	1.1167	1.04869	1.24467	1.24479	1.22312	1.33129	1.29569	1.25773	1.20624	1.16542	1.10023	1.22255	1.1701	1.33169	1.24396	1.2528	1.15183	1.14371	1.28402	1.26493	1.34599	1.30477	1.26056	1.27235	1.19739	1.23039	1.25797	1.11904	1.26919	1.3173	1.30876	1.17229	1.15073	1.17119	1.18224	1.15972	1.18193	1.23373	1.20764	1.13887	1.14595	1.22949	1.28206
	28.4795	1.1926	1.13076	1.09437	1.27544	1.15072	1.11647	1.05266	1.24268	1.24422	1.22135	1.32563	1.28885	1.26164	1.2628	1.22792	1.13027	1.25251	1.18272	1.3523	1.26012	1.26233	1.14493	1.14029	1.2783	1.26288	1.3447	1.30461	1.24745	1.27161	1.19656	1.2342	1.26157	1.1191	1.26653	1.31331	1.30811	1.17302	1.14849	1.17043	1.18185	1.1577	1.18927	1.23036	1.21098	1.13708	1.14302	1.21725	1.26952
	28.9795	1.20526	1.13572	1.09614	1.27814	1.15446	1.11728	1.0545	1.23998	1.24465	1.21923	1.32516	1.29068	1.26595	1.21815	1.19064	1.10412	1.23363	1.18176	1.33367	1.24173	1.25366	1.18655	1.1312	1.28245	1.26786	1.34442	1.30316	1.25763	1.2762	1.19127	1.23054	1.26019	1.11735	1.26183	1.31534	1.30415	1.17407	1.14197	1.17231	1.18058	1.15039	1.1719	1.22445	1.20259	1.13227	1.14288	1.20971	1.26479
	29.4795	1.19196	1.13435	1.09253	1.27091	1.16734	1.11447	1.05712	1.23879	1.24138	1.21304	1.31343	1.28426	1.26238	1.24248	1.21125	1.12898	1.24556	1.19151	1.34518	1.25028	1.26001	1.153	1.12238	1.27551	1.25863	1.34233	1.30569	1.25929	1.26406	1.19256	1.23041	1.25667	1.11704	1.26552	1.31374	1.30405	1.17248	1.14288	1.17414	1.17858	1.14562	1.16527	1.2174	1.2014	1.12933	1.14221	1.21321	1.26939
	29.9795	1.1758	1.1431	1.09673	1.26758	1.14846	1.11367	1.05873	1.23822	1.24378	1.20981	1.31159	1.28627	1.26404	1.25266	1.24104	1.1411	1.25976	1.18511	1.35605	1.25612	1.26191	1.17064	1.13396	1.2744	1.26118	1.33772	1.3024	1.2573	1.26498	1.18708	1.22955	1.26043	1.11539	1.26047	1.31138	1.30339	1.17274	1.14227	1.16298	1.17693	1.15279	1.16936	1.21684	1.20072	1.12652	1.14143	1.21247	1.26248
	30.4795	1.21118	1.15921	1.09855	1.2662	1.16813	1.11123	1.06002	1.23618	1.24097	1.20094	1.30443	1.27566	1.25696	1.25008	1.22804	1.12202	1.2547	1.18658	1.34461	1.24827	1.25931	1.16163	1.12463	1.27466	1.25337	1.3376	1.30274	1.26424	1.26399	1.18924	1.22473	1.25988	1.11549	1.2588	1.31334	1.30317	1.17217	1.1394	1.16764	1.1755	1.15257	1.16968	1.21948	1.2062	1.12859	1.14055	1.2171	1.26875
	30.9795	1.20399	1.14021	1.08892	1.26233	1.14475	1.11282	1.06095	1.23649	1.24288	1.19852	1.30599	1.27872	1.26046	1.19927	1.16354	1.09662	1.22957	1.1731	1.3059	1.23431	1.25359	1.1525	1.14337	1.27482	1.26072	1.33446	1.30315	1.25659	1.26112	1.18125	1.22153	1.2554	1.11274	1.25606	1.30858	1.29922	1.16931	1.13564	1.1666	1.17588	1.14686	1.16982	1.2178	1.2051	1.12649	1.14014	1.21085	1.25876
	31.4795	1.217	1.14345	1.08435	1.2578	1.15033	1.11218	1.06148	1.23542	1.24319	1.19661	1.30742	1.2758	1.26114	1.23678	1.22046	1.12422	1.25076	1.18194	1.34543	1.25217	1.2583	1.16029	1.12526	1.28003	1.25638	1.3324	1.30249	1.25137	1.26346	1.1861	1.2165	1.24636	1.11327	1.25627	1.30587	1.298	1.17001	1.14416	1.16666	1.177	1.14346	1.15931	1.22081	1.20157	1.11927	1.13628	1.21591	1.2605
	31.9795	1.14813	1.11762	1.0886	1.26654	1.14007	1.10922	1.06449	1.23415	1.24147	1.19988	1.31138	1.27748	1.26082	1.23261	1.21671	1.12405	1.24005	1.18408	1.34198	1.24822	1.25484	1.14877	1.10504	1.27462	1.25292	1.33019	1.30069	1.26076	1.26334	1.18363	1.22108	1.25438	1.11271	1.25303	1.3061	1.30039	1.16806	1.14159	1.15888	1.17481	1.13563	1.1502	1.21563	1.199	1.11253	1.1363	1.2129	1.25326
	32.4795	1.1992	1.1363	1.10369	1.25051	1.15481	1.10662	1.06916	1.2326	1.23908	1.19553	1.30486	1.27859	1.26398	1.24847	1.21642	1.1305	1.24833	1.18038	1.33547	1.25004	1.25261	1.16044	1.12123	1.27453	1.24859	1.34153	1.30131	1.25602	1.26696	1.18187	1.23007	1.25387	1.10862	1.2514	1.30413	1.2965	1.1686	1.13496	1.16267	1.17364	1.13676	1.16038	1.21137	1.20011	1.11275	1.13686	1.2118	1.25579
	32.9795	1.20503	1.13297	1.10393	1.25595	1.16295	1.11091	1.07247	1.23501	1.24381	1.19866	1.30243	1.27393	1.26716	1.24644	1.20784	1.12524	1.24287	1.1772	1.32799	1.24939	1.25703	1.13794	1.11679	1.27599	1.25091	1.33636	1.30014	1.26213	1.26187	1.17292	1.21716	1.24871	1.11701	1.25413	1.30175	1.29349	1.1658	1.14279	1.1629	1.17237	1.14051	1.15434	1.21757	1.1985	1.11232	1.13702	1.20912	1.25167
	33.4795	1.20849	1.11766	1.09494	1.26071	1.15072	1.11076	1.07102	1.23319	1.24088	1.19508	1.3005	1.27451	1.26125	1.24435	1.20714	1.13003	1.24718	1.17874	1.33742	1.25052	1.25496	1.14308	1.12007	1.26943	1.24421	1.33703	1.30083	1.25232	1.25821	1.17724	1.22339	1.24687	1.10993	1.25484	1.30324	1.29306	1.16775	1.14152	1.1563	1.17306	1.12621	1.16424	1.20446	1.19482	1.10862	1.13632	1.20721	1.24701
	33.9795	1.19173	1.11999	1.0976	1.24517	1.14275	1.10464	1.07245	1.23208	1.23862	1.19385	1.29312	1.27127	1.26166	1.23644	1.21635	1.12527	1.24124	1.18019	1.33998	1.25578	1.25646	1.17843	1.11832	1.27995	1.24793	1.33204	1.29859	1.25939	1.25594	1.17851	1.20994	1.24752	1.10885	1.24622	1.2999	1.29006	1.16635	1.12775	1.1616	1.17449	1.12882	1.15104	1.20277	1.19227	1.10538	1.13562	1.20486	1.24672
	34.4795	1.20142	1.14887	1.10341	1.25227	1.16331	1.1054	1.07675	1.2291	1.24075	1.18983	1.30185	1.26662	1.26321	1.23747	1.20719	1.12369	1.24754	1.17456	1.32912	1.24922	1.25465	1.14537	1.11499	1.26396	1.24634	1.32438	1.29922	1.25211	1.26144	1.1724	1.2132	1.24527	1.10912	1.24689	1.30135	1.28734	1.1639	1.13683	1.15556	1.17384	1.12129	1.14907	1.20548	1.18874	1.10303	1.13356	1.20238	1.24748
	34.9795	1.17754	1.14395	1.10429	1.24896	1.15403	1.10369	1.07825	1.2262	1.23746	1.18949	1.2917	1.27003	1.25521	1.25191	1.22201	1.12813	1.24995	1.17391	1.33183	1.24788	1.25697	1.15387	1.11405	1.27546	1.24995	1.32629	1.29831	1.25496	1.25539	1.1732	1.20491	1.24045	1.10692	1.24808	1.29884	1.28574	1.15995	1.13256	1.15496	1.17178	1.12292	1.14275	1.19317	1.19241	1.09916	1.13291	1.20607	1.25185
	35.4795	1.20179	1.15099	1.094	1.25869	1.15388	1.10651	1.07729	1.2273	1.23667	1.18816	1.29306	1.2635	1.26259	1.24399	1.20662	1.11395	1.24762	1.17046	1.33559	1.24784	1.25487	1.16986	1.10981	1.27007	1.24565	1.32986	1.29798	1.25056	1.25322	1.16823	1.20274	1.23946	1.1088	1.24167	1.29663	1.2809	1.1628	1.1387	1.15564	1.16927	1.10983	1.14026	1.1903	1.18297	1.09579	1.13192	1.19767	1.24943
	35.9795	1.1891	1.14416	1.10239	1.23578	1.15025	1.09791	1.07953	1.22504	1.23601	1.18236	1.29459	1.26563	1.25167	1.25047	1.21452	1.12861	1.25651	1.16826	1.32946	1.25173	1.25249	1.168	1.11877	1.27492	1.24166	1.32687	1.29626	1.24602	1.2594	1.16325	1.20548	1.23765	1.10532	1.24212	1.29265	1.28123	1.16173	1.13189	1.14824	1.16676	1.14046	1.14645	1.18792	1.18991	1.09505	1.1342	1.19754	1.24608
	36.4795	1.1962	1.13778	1.09898	1.24935	1.13957	1.09966	1.08329	1.22361	1.23241	1.1807	1.29165	1.26714	1.25788	1.25119	1.21704	1.12343	1.25867	1.16866	1.33987	1.24799	1.25381	1.15272	1.10464	1.2651	1.24439	1.32649	1.29578	1.25205	1.25372	1.16088	1.1988	1.23438	1.1023	1.23997	1.29067	1.27787	1.16091	1.1235	1.14761	1.16834	1.13923	1.14411	1.19008	1.1858	1.09146	1.13172	1.20012	1.23523
	36.9795	1.19739	1.1311	1.10074	1.24995	1.14058	1.09757	1.08445	1.2219	1.23298	1.17706	1.28974	1.26302	1.26033	1.24361	1.22102	1.1163	1.23839	1.16067	1.33613	1.25206	1.25163	1.17345	1.11266	1.27307	1.2425	1.32166	1.29624	1.25112	1.25618	1.16538	1.20572	1.23806	1.104	1.24126	1.28973	1.27615	1.15966	1.13034	1.1473	1.16637	1.13856	1.14736	1.19225	1.18541	1.09054	1.1311	1.19616	1.23949
	37.4795	1.22889	1.14142	1.11244	1.25085	1.14892	1.09856	1.08693	1.22338	1.23386	1.178	1.2831	1.26283	1.25787	1.22201	1.20247	1.10457	1.23952	1.1634	1.31997	1.24556	1.24909	1.16422	1.10838	1.26804	1.24114	1.32025	1.29447	1.25304	1.2558	1.15906	1.19887	1.23637	1.10367	1.2393	1.28851	1.2751	1.15788	1.13082	1.14545	1.16206	1.12347	1.12646	1.18477	1.18066	1.08421	1.13051	1.1982	1.23502
	37.9795	1.18759	1.12241	1.10766	1.22968	1.14394	1.09702	1.08532	1.22448	1.23175	1.17749	1.28165	1.26348	1.2575	1.24069	1.18488	1.11506	1.23614	1.16745	1.32029	1.24866	1.24797	1.16107	1.12209	1.27762	1.24172	1.32247	1.29362	1.25153	1.26114	1.15916	1.20057	1.23846	1.10268	1.24053	1.28449	1.27334	1.15735	1.12711	1.14362	1.16521	1.13881	1.14468	1.18606	1.17942	1.0862	1.1261	1.1912	1.23702
	38.4795	1.19606	1.13229	1.10074	1.24119	1.14099	1.10123	1.09	1.22167	1.22953	1.17389	1.28473	1.25592	1.25388	1.22083	1.19246	1.1068	1.23675	1.15678	1.33111	1.24559	1.24729	1.15296	1.11442	1.27424	1.24011	1.32372	1.29562	1.24279	1.26094	1.15391	1.19645	1.22352	1.1056	1.23635	1.28496	1.26919	1.15608	1.13269	1.14184	1.16127	1.1221	1.13424	1.1875	1.18218	1.08187	1.12781	1.19446	1.2341
	38.9795	1.21016	1.13235	1.11315	1.24967	1.1483	1.09494	1.0889	1.21924	1.2302	1.17066	1.28221	1.25778	1.26707	1.24311	1.21095	1.11532	1.24737	1.15933	1.32034	1.24897	1.24747	1.15099	1.10461	1.26361	1.23704	1.31686	1.29384	1.2415	1.25392	1.14992	1.2013	1.2217	1.10518	1.23578	1.28639	1.26759	1.15754	1.13366	1.14167	1.15999	1.13044	1.13457	1.18461	1.18028	1.07881	1.12453	1.1863	1.22648
	39.4795	1.19698	1.12329	1.1088	1.24299	1.14102	1.09841	1.0918	1.21594	1.22739	1.16919	1.27913	1.25548	1.26878	1.23198	1.21059	1.12034	1.24528	1.16113	1.31356	1.24611	1.242	1.13118	1.10307	1.26158	1.23444	1.31994	1.29206	1.24566	1.25995	1.15257	1.19564	1.22354	1.10489	1.23474	1.28167	1.26515	1.15593	1.12196	1.14411	1.15948	1.13176	1.13296	1.17928	1.1782	1.07856	1.12422	1.18615	1.23059
	39.9795	1.17281	1.11039	1.11105	1.22748	1.13819	1.09917	1.09553	1.2179	1.22623	1.16758	1.28019	1.25733	1.2659	1.2378	1.21312	1.11535	1.24944	1.15937	1.32508	1.24342	1.24487	1.17475	1.10897	1.2613	1.23182	1.32218	1.29169	1.247	1.25207	1.1488	1.19064	1.22408	1.10218	1.23097	1.28415	1.2666	1.15639	1.13295	1.1382	1.15742	1.12465	1.13231	1.17236	1.17491	1.0741	1.12333	1.1791	1.22458
	40.4795	1.19367	1.1237	1.10581	1.22463	1.13982	1.09494	1.09702	1.2156	1.22528	1.17004	1.27535	1.25515	1.26247	1.24598	1.22099	1.12925	1.24698	1.16492	1.32372	1.25154	1.24524	1.15409	1.10061	1.26491	1.23037	1.31267	1.29135	1.25206	1.24903	1.14927	1.19463	1.22473	1.10386	1.23399	1.28352	1.26379	1.15627	1.12397	1.13903	1.15583	1.11889	1.13046	1.17402	1.17488	1.07261	1.12339	1.18567	1.21988
	40.9795	1.22387	1.09054	1.10242	1.23912	1.14031	1.0941	1.097	1.21714	1.22375	1.16347	1.26977	1.25518	1.26647	1.21626	1.21089	1.10739	1.24451	1.15742	1.31148	1.24638	1.24437	1.17546	1.10774	1.26199	1.23284	1.31696	1.29101	1.23786	1.24839	1.139	1.18759	1.21462	1.10214	1.22777	1.27737	1.25946	1.15363	1.12072	1.1359	1.15648	1.11823	1.12818	1.16931	1.17015	1.06836	1.11716	1.1835	1.22438
	41.4795	1.2047	1.10951	1.10976	1.22851	1.14344	1.09294	1.09855	1.21411	1.22565	1.16074	1.27927	1.25409	1.26574	1.22025	1.21118	1.11768	1.24606	1.1609	1.32262	1.24864	1.24514	1.17419	1.10403	1.26034	1.22947	1.32054	1.29058	1.25142	1.25526	1.14118	1.19215	1.21292	1.09936	1.22695	1.27989	1.2596	1.15288	1.11916	1.13312	1.15222	1.12173	1.14015	1.17182	1.17244	1.06703	1.11816	1.17932	1.21455
	41.9795	1.20092	1.1058	1.11918	1.23251	1.1401	1.08968	1.10204	1.21268	1.22334	1.16441	1.27308	1.25118	1.26749	1.24154	1.24376	1.13037	1.24924	1.16444	1.31814	1.24764	1.24376	1.15528	1.10678	1.2604	1.22328	1.31095	1.28954	1.24541	1.25758	1.14319	1.18754	1.2193	1.10085	1.22761	1.27929	1.25928	1.1535	1.12297	1.13573	1.15076	1.12976	1.12734	1.1655	1.16921	1.06406	1.11586	1.17299	1.21814
	42.4795	1.19803	1.10289	1.11858	1.22522	1.15615	1.09442	1.104	1.21292	1.21875	1.15514	1.27206	1.25082	1.27019	1.20482	1.22263	1.11007	1.23296	1.15521	1.30503	1.24262	1.24276	1.14546	1.10065	1.26649	1.22573	1.30995	1.2899	1.24393	1.25473	1.14036	1.18514	1.21336	1.09912	1.22345	1.27967	1.25342	1.15082	1.12078	1.13431	1.14959	1.12339	1.12291	1.16674	1.17102	1.06114	1.11559	1.1716	1.21151
	42.9795	1.18136	1.09575	1.1098	1.22556	1.13959	1.08979	1.10654	1.21035	1.22205	1.17969	1.28245	1.26381	1.27409	1.20814	1.21442	1.10696	1.23521	1.15218	1.30143	1.23786	1.23923	1.17809	1.11381	1.25997	1.2275	1.31303	1.28875	1.24089	1.24765	1.13453	1.18096	1.217	1.09618	1.22341	1.281	1.25444	1.15375	1.12447	1.13318	1.14868	1.12185	1.11715	1.15648	1.16717	1.05814	1.11535	1.17067	1.21716
[truncated: 53 more columns]

## Sheet: Figure 1 - Supplemental 1
		EKAR-EV																					EKAR2G1																					EKAR4
	Time (min)	Cell 1	Cell 2	Cell 3	Cell 4	Cell 5	Cell 6	Cell 7	Cell 8	Cell 9	Cell 10	Cell 11	Cell 12	Cell 13	Cell 14	Cell 15	Cell 16	Cell 17	Cell 18	Cell 19	Cell 20		Cell 1	Cell 2	Cell 3	Cell 4	Cell 5	Cell 6	Cell 7	Cell 8	Cell 9	Cell 10	Cell 11	Cell 12	Cell 13	Cell 14	Cell 15	Cell 16	Cell 17	Cell 18	Cell 19	Cell 20		Cell 1	Cell 2	Cell 3	Cell 4	Cell 5	Cell 6
	-5.483	0.981295	0.967178	0.980801	0.974821	0.970187	0.996268	0.984141	0.968642	0.978436	0.981922	0.982125	0.985465	0.976663	0.975684	0.989327	0.989978	0.995078	0.989615	0.993389	0.99809		0.984658	0.96491	0.993542	0.969773	0.975803	0.994443	0.974695	0.968246	0.98105	0.985174	0.99057	0.982069	0.979718	0.981271	0.969079	0.972848	0.982756	0.98096	0.97722	0.974647		0.980131	0.986999	0.965351	0.953529	0.978631	0.967461
	-4.983	0.982443	0.972184	0.981605	0.97793	0.976819	0.997969	0.98688	0.973417	0.980544	0.984542	0.983855	0.986641	0.976989	0.976695	0.991679	0.993034	0.997294	0.991296	0.994127	1.00043		0.988475	0.965445	0.993996	0.972523	0.975539	0.995924	0.977531	0.971629	0.981313	0.983484	0.990407	0.982589	0.983944	0.981993	0.971875	0.978792	0.986312	0.984277	0.979616	0.977513		0.980369	0.989091	0.969414	0.955495	0.976651	0.966874
	-4.483	0.984437	0.973796	0.981113	0.98045	0.978834	0.993324	0.987876	0.979216	0.984098	0.984252	0.985232	0.989076	0.982383	0.981471	0.992738	0.99539	0.99921	0.992722	0.995011	0.999842		0.990326	0.967378	0.999343	0.974283	0.979091	0.996082	0.979693	0.976035	0.982922	0.984148	0.990424	0.983111	0.985365	0.984336	0.974529	0.981298	0.986915	0.985162	0.982013	0.980106		0.982186	0.990434	0.974713	0.962594	0.980845	0.970984
	-3.983	0.985678	0.978276	0.985914	0.984757	0.98412	0.995976	0.988887	0.978486	0.987025	0.98599	0.987814	0.989436	0.984269	0.983135	0.994643	0.996702	1.00112	0.994062	0.996097	0.999892		0.98094	0.972653	0.99909	0.975138	0.981912	0.998441	0.983582	0.979514	0.986256	0.985699	0.9915	0.985276	0.986127	0.989919	0.979522	0.979981	0.986988	0.986788	0.98387	0.982339		0.982128	0.99087	0.97759	0.968606	0.981259	0.972965
	-3.483	0.987329	0.979312	0.984515	0.984001	0.987364	0.994309	0.990139	0.981369	0.989124	0.98816	0.988877	0.992044	0.988904	0.986056	0.996547	0.99827	1.00246	0.994333	0.996852	0.999954		0.988087	0.976248	0.998079	0.980322	0.984481	0.998316	0.984723	0.98312	0.988613	0.988396	0.991382	0.986312	0.988213	0.989134	0.980454	0.982088	0.989359	0.986986	0.985264	0.983987		0.9847	0.99519	0.982373	0.974216	0.984473	0.977633
	-2.983	0.99067	0.982236	0.988405	0.987963	0.991996	0.998648	0.99201	0.985256	0.991124	0.990019	0.989134	0.990332	0.992914	0.988852	1.00028	0.999456	1.00437	0.9958	0.997318	1.00178		0.988446	0.974709	1.00244	0.981902	0.987704	1.00084	0.988498	0.986058	0.991017	0.990684	0.99279	0.987661	0.987392	0.992978	0.982021	0.984177	0.989657	0.989031	0.986349	0.986455		0.991623	1.00019	0.98783	0.978929	0.987652	0.980954
	-2.483	0.994807	0.986821	0.988756	0.990848	0.992892	1.00096	0.993036	0.988436	0.992423	0.992864	0.99047	0.991936	0.994668	0.990744	0.994971	0.99978	1.00534	0.995955	0.997533	1.00112		0.995521	0.97608	1.00249	0.986055	0.987439	0.999476	0.989845	0.988099	0.993347	0.992637	0.993305	0.989291	0.993146	0.994486	0.983414	0.987083	0.991146	0.989481	0.987671	0.987841		0.992399	0.998784	0.988473	0.985841	0.988875	0.983564
	-1.983	0.996232	0.984627	0.992013	0.992601	0.993886	1.00313	0.996434	0.991998	0.994604	0.993731	0.992098	0.993157	0.996039	0.990893	0.995646	0.999488	1.00043	0.996197	0.997706	1.00202		0.994053	0.98495	1.00365	0.989687	0.990551	1.00039	0.992447	0.990887	0.994472	0.995038	0.994048	0.991195	0.992945	0.995706	0.986275	0.989197	0.992598	0.991476	0.989972	0.98976		0.993202	1.00161	0.993136	0.987023	0.992252	0.988765
	-1.483	0.992194	0.988775	0.990688	0.993921	0.998087	1.00116	0.995315	0.992861	0.998334	0.995174	0.993275	0.992467	1.00204	0.994241	0.997183	1.00175	1.00118	0.996229	0.998709	1.0002		0.998939	0.985095	1.00159	0.991042	0.993166	1.00066	0.993837	0.993477	0.996872	0.995653	0.99529	0.992611	0.992754	0.996269	0.987419	0.98983	0.992776	0.991959	0.990931	0.991449		0.994396	0.997178	0.995903	0.990349	0.992731	0.991041
	-0.983	0.996805	0.992314	0.992976	0.998646	1.00154	1.00358	0.996939	0.993897	0.996233	0.99746	0.997293	0.995381	0.994291	0.99428	0.997119	1.00057	1.0019	0.997639	0.999461	1.00168		0.999752	0.991733	0.997492	0.992937	0.994866	0.999397	0.996325	0.995541	0.997345	0.998217	0.996463	0.994742										1.00053	0.999847	1.00004	0.9965	0.995667	0.995804
EGF Addition	0	1	1	1	1	1	1	1	1	1	1	1	1	1	1	1	1	1	1	1	1		1	1	1	1	1	1	1	1	1	1	1	1	1	1	1	1	1	1	1	1		1	1	1	1	1	1
	0.475333	1.00103	1.00123	1.00205	1.00593	0.998048	1.00053	0.999316	1.00213	1.00238	1.0026	1.00284	1.00064	1.00388	0.999474	0.999409	1.00504	1.00617	0.998746	1.00228	1.00093		0.991491	0.998308	1.00354	0.998392	1.00181	0.99878	1.00174	1.00052	1.00144	1.0058	0.999998	1.00054	0.996024	0.998556	0.998293	1.00096	0.999603	0.998701	0.99893	1.00011		1.00948	1.01734	1.00548	1.00739	1.00354	1.00487
	0.975333	1.00776	1.00778	1.00922	1.00889	0.997706	1.00415	1.00593	1.00208	1.00479	1.0048	1.00406	1.00354	1.0044	1.00413	1.00152	1.00546	1.01008	1.00168	1.0036	0.99954		0.977762	0.997176	1.00918	0.998504	1.00156	0.998621	1.00499	1.00072	1.00608	1.00575	0.999786	1.00173	0.995319	1.00234	1.00085	1.00446	1.00006	0.99936	0.998775	1.00065		1.01241	1.01807	1.0144	1.01345	1.00639	1.00815
	1.47533	1.03063	1.04586	1.03596	1.03772	1.00232	1.00727	1.05562	1.01623	1.01049	1.00974	1.01048	1.02174	1.00598	1.00761	1.00708	1.00973	1.01419	1.00447	1.00481	0.997597		0.974706	0.997749	1.0087	1.00056	1.00422	0.99758	1.01814	1.00205	1.0089	1.00733	1.0008	1.00336	1.00005	1.0045	1.00419	1.00671	0.999987	0.999877	1.00125	1.00221		1.02192	1.01481	1.07771	1.04525	1.0347	1.02127
	1.97533	1.10195	1.14269	1.12003	1.12568	1.01672	1.0229	1.20298	1.06525	1.03567	1.02648	1.0337	1.07897	1.0149	1.02924	1.02216	1.02721	1.01632	1.0061	1.00444	0.995827		1.06212	0.995559	1.01574	1.00628	1.0077	1.00332	1.06386	1.01144	1.01815	1.01276	1.004	1.00754	1.01208	1.01334	1.01973	1.01525	1.00047	0.998491	1.01043	1.0034		1.07127	1.03154	1.29063	1.15827	1.1522	1.08121
	2.47533	1.19484	1.24831	1.25161	1.25628	1.05477	1.05743	1.37248	1.17156	1.11074	1.07837	1.09564	1.17398	1.04301	1.0895	1.08432	1.09132	1.01971	1.0078	1.00592	0.996186		1.20598	1.00469	1.04406	1.01188	1.01908	1.02386	1.14853	1.04162	1.04409	1.02423	1.01788	1.01762	1.03615	1.0606	1.04891	1.04401	1.00397	0.999976	1.03087	1.00779		1.20667	1.0825	1.64816	1.40754	1.43417	1.28245
	2.97533	1.26413	1.30909	1.37087	1.35879	1.14274	1.13493	1.46446	1.30381	1.24042	1.1789	1.20237	1.28788	1.12513	1.20215	1.20859	1.22034	1.02422	1.01252	1.00971	0.999025		1.23403	1.014	1.09748	1.04002	1.04839	1.06044	1.21609	1.09248	1.09043	1.05369	1.04561	1.04105	1.0963	1.1456	1.10191	1.09205	1.00803	0.999647	1.07658	1.01658		1.40722	1.176	1.93266	1.70496	1.71829	1.55935
	3.47533	1.30354	1.33481	1.44727	1.41123	1.26098	1.25887	1.48877	1.3936	1.36134	1.30915	1.32163	1.38905	1.24194	1.29534	1.33108	1.34925	1.03325	1.0218	1.01771	1.00061		1.22798	1.03934	1.16183	1.08867	1.09441	1.09275	1.23682	1.13342	1.1388	1.09645	1.08096	1.07833	1.16843	1.22584	1.1544	1.14676	1.01322	1.00206	1.14032	1.03386		1.57762	1.31452	2.07454	1.91592	1.85404	1.73452
	3.97533	1.32455	1.34493	1.47933	1.42983	1.37447	1.37825	1.4934	1.43718	1.43135	1.41081	1.41103	1.45382	1.34342	1.35561	1.4044	1.42308	1.05355	1.04032	1.03569	1.00129		1.22382	1.07431	1.19677	1.14024	1.1536	1.10905	1.2395	1.1489	1.1753	1.14444	1.10621	1.12337	1.23043	1.26166	1.18894	1.18662	1.0208	1.0026	1.20029	1.06061		1.70134	1.45468	2.12462	2.01216	1.89736	1.79808
	4.47533	1.33573	1.35088	1.49391	1.43584	1.44645	1.46028	1.49714	1.45184	1.46329	1.47456	1.46287	1.47988	1.39743	1.38396	1.4352	1.4532	1.08701	1.07281	1.06345	1.00157		1.19704	1.10749	1.20623	1.17714	1.19976	1.11422	1.23886	1.15229	1.19636	1.18633	1.11757	1.16574	1.25914	1.27951	1.20926	1.20207	1.02821	1.00687	1.2383	1.09363		1.76162	1.56098	2.1339	2.03488	1.90476	1.81065
	4.97533	1.3411	1.35234	1.49937	1.43811	1.47709	1.49707	1.49388	1.46076	1.47319	1.50548	1.48619	1.49206	1.42388	1.40269	1.44464	1.45929	1.13441	1.11733	1.10337	1.00314		1.1864	1.13146	1.20174	1.19368	1.22108	1.11544	1.23912	1.15199	1.20491	1.20629	1.1206	1.19127	1.26229	1.27529	1.21519	1.20728	1.03583	1.01156	1.25344	1.12678		1.80021	1.64163	2.1237	2.03667	1.9065	1.81317
	5.47533	1.34369	1.35408	1.49847	1.43663	1.48789	1.51099	1.49379	1.45672	1.47465	1.51438	1.49765	1.49303	1.44099	1.41682	1.44817	1.46152	1.18694	1.16806	1.1499	1.00504		1.17403	1.14545	1.19733	1.19666	1.22664	1.11244	1.23816	1.15063	1.20729	1.2156	1.12014	1.20071	1.26829	1.27373	1.21736	1.21121	1.04678	1.01633	1.2607	1.15142		1.82545	1.6949	2.12461	2.03529	1.90861	1.81499
	5.97533	1.34635	1.35534	1.49965	1.43928	1.49144	1.51566	1.49131	1.4656	1.47404	1.52042	1.50027	1.49751	1.44907	1.42995	1.44751	1.45593	1.23411	1.2189	1.19696	1.00564		1.1686	1.1463	1.1935	1.1961	1.22728	1.11131	1.23603	1.14936	1.20764	1.21627	1.11879	1.20248	1.26881	1.2729	1.21924	1.21255	1.0607	1.02285	1.26062	1.16452		1.83278	1.71716	2.11651	2.02977	1.90462	1.81151
	6.47533	1.34635	1.35328	1.49657	1.43365	1.49399	1.52062	1.49132	1.46401	1.47402	1.52145	1.5001	1.50577	1.45696	1.4384	1.44773	1.45609	1.27445	1.26131	1.23904	1.00646		1.14585	1.14927	1.18941	1.19509	1.22705	1.10979	1.23628	1.14732	1.2056	1.2141	1.11785	1.20224	1.26601	1.27058	1.21894	1.21234	1.075	1.03205	1.2625	1.17009		1.84248	1.74852	2.11528	2.02476	1.90443	1.81303
	6.97533	1.34903	1.35556	1.49801	1.43188	1.49334	1.51712	1.48638	1.46504	1.47325	1.52146	1.50045	1.50583	1.46443	1.44955	1.44906	1.45559	1.30542	1.29501	1.2703	1.00917		1.14223	1.15227	1.18946	1.19414	1.22737	1.10876	1.23387	1.14531	1.20586	1.21498	1.11627	1.20158	1.26478	1.26869	1.21932	1.21013	1.09372	1.0425	1.26021	1.17167		1.84314	1.74591	2.10983	2.02063	1.90296	1.81217
	7.47533	1.35455	1.35491	1.49777	1.43209	1.49396	1.52145	1.487	1.46963	1.47226	1.5178	1.50192	1.50762	1.47376	1.45352	1.44887	1.45449	1.32661	1.32068	1.28941	1.01205		1.14578	1.14962	1.18311	1.1902	1.22311	1.10683	1.23446	1.14359	1.20397	1.21227	1.11425	1.19925	1.26413	1.26649	1.21721	1.21181	1.11275	1.056	1.26008	1.17195		1.84662	1.74732	2.10872	2.01362	1.90445	1.81151
	7.97533	1.34975	1.3525	1.49741	1.43065	1.49312	1.51687	1.48707	1.46209	1.47115	1.51631	1.50001	1.50706	1.47029	1.45291	1.44878	1.45264	1.34149	1.33822	1.30061	1.01665		1.13391	1.14537	1.17793	1.19117	1.22422	1.10455	1.23376	1.14291	1.20177	1.20968	1.11335	1.19799	1.25874	1.26503	1.21968	1.21255	1.13262	1.07147	1.25708	1.17238		1.85112	1.76543	2.10801	2.01181	1.8994	1.8085
	8.47533	1.3487	1.35092	1.49579	1.42814	1.49295	1.51483	1.49062	1.46581	1.47042	1.51357	1.49977	1.50555	1.47375	1.45453	1.44907	1.45152	1.3505	1.34908	1.30657	1.02122		1.13308	1.15283	1.1793	1.1895	1.22187	1.10381	1.2335	1.14149	1.2026	1.21057	1.11281	1.19725	1.2539	1.2613	1.22025	1.21404	1.15345	1.08804	1.25636	1.17239		1.85053	1.76595	2.10304	2.00827	1.89901	1.80767
	8.97533	1.34941	1.35367	1.49394	1.42932	1.49396	1.51191	1.48863	1.46047	1.46818	1.5131	1.49885	1.50609	1.47268	1.45254	1.44548	1.45153	1.35498	1.35571	1.30888	1.02554		1.13058	1.14679	1.17561	1.18604	1.22037	1.10157	1.23208	1.13936	1.20002	1.20463	1.11122	1.19477	1.25117	1.26124	1.21989	1.21426	1.17097	1.10252	1.25564	1.17096		1.85364	1.76875	2.1035	2.00663	1.89782	1.80443
	9.47533	1.35213	1.3572	1.49582	1.42559	1.4889	1.51118	1.48551	1.45849	1.46788	1.51337	1.49932	1.50648	1.46913	1.45512	1.4476	1.45141	1.35879	1.36094	1.31062	1.03094		1.12468	1.14492	1.1774	1.18707	1.21768	1.10017	1.23133	1.13761	1.19883	1.20594	1.10925	1.19315	1.25353	1.25781	1.21875	1.21432	1.18641	1.12039	1.25431	1.17002		1.85248	1.77467	2.09846	2.00145	1.89526	1.80317
	9.97533	1.35104	1.35309	1.49447	1.42474	1.49004	1.50985	1.48507	1.45754	1.46712	1.50959	1.49974	1.50804	1.46378	1.4506	1.44434	1.44986	1.35905	1.36407	1.31038	1.03472		1.12563	1.1432	1.17296	1.18598	1.21652	1.09827	1.23031	1.13727	1.19592	1.20299	1.10825	1.19192	1.24788	1.25488	1.2179	1.21372	1.19579	1.1354	1.25408	1.16847		1.8532	1.78073	2.09437	1.99806	1.89551	1.80039
	10.4753	1.35249	1.35341	1.49288	1.42714	1.49152	1.50895	1.48311	1.45979	1.46577	1.50577	1.49923	1.50635	1.46905	1.45385	1.44165	1.44635	1.3602	1.36516	1.30996	1.03808		1.13446	1.14712	1.17585	1.18657	1.21557	1.09746	1.2297	1.13473	1.19438	1.20118	1.10679	1.19044	1.24749	1.2557	1.21987	1.21341	1.20825	1.1499	1.2542	1.16818		1.84956	1.78498	2.09254	1.99391	1.89187	1.80116
	10.9753	1.35545	1.35398	1.49622	1.42434	1.48889	1.50579	1.48234	1.45894	1.46261	1.50479	1.4988	1.50648	1.46212	1.45253	1.44238	1.44792	1.36193	1.3655	1.31031	1.04214		1.12837	1.13906	1.17309	1.18478	1.21311	1.09583	1.22907	1.1343	1.19187	1.19934	1.10512	1.18882	1.24654	1.25036	1.22042	1.21408	1.21162	1.16268	1.25302	1.16709		1.85096	1.78012	2.08754	1.99196	1.88894	1.79788
	11.4753	1.35397	1.3541	1.49645	1.42409	1.48733	1.50524	1.48225	1.45173	1.46132	1.50224	1.49748	1.5063	1.45737	1.4513	1.44114	1.44666	1.36304	1.3676	1.31048	1.04797		1.12916	1.13975	1.17322	1.18158	1.21303	1.09407	1.22733	1.13157	1.192	1.19973	1.10428	1.18774	1.24004	1.24806	1.21659	1.21148	1.21629	1.172	1.25216	1.16554		1.83951	1.78364	2.0802	1.98037	1.88761	1.79308
	11.9753	1.35181	1.35258	1.49002	1.4252	1.48353	1.50385	1.4812	1.45315	1.45974	1.49836	1.49639	1.50627	1.45362	1.45026	1.44165	1.44432	1.36297	1.36683	1.31024	1.05154		1.12185	1.14182	1.17042	1.18065	1.20993	1.09152	1.22622	1.13007	1.19021	1.1965	1.10317	1.18553	1.2392	1.24514	1.21628	1.21164	1.21802	1.17992	1.25127	1.16476		1.8287	1.7719	2.07675	1.97885	1.88454	1.79332
	12.4753	1.3503	1.35113	1.48977	1.41947	1.48298	1.50075	1.4786	1.44666	1.45577	1.49212	1.49537	1.50412	1.45025	1.44807	1.4407	1.44194	1.36305	1.36661	1.3095	1.05349		1.1221	1.14064	1.17662	1.17845	1.20657	1.0913	1.22492	1.12869	1.18908	1.19395	1.10148	1.1838	1.23606	1.24291	1.21562	1.2098	1.21999	1.18443	1.25069	1.16356		1.83652	1.78084	2.07178	1.97808	1.88421	1.79041
	12.9753	1.35272	1.35422	1.48921	1.42083	1.4785	1.50017	1.48024	1.44933	1.45266	1.48881	1.49637	1.50588	1.44687	1.44648	1.43769	1.44157	1.36333	1.36443	1.30908	1.05485		1.11189	1.13389	1.17345	1.17984	1.20463	1.08902	1.22349	1.12719	1.18627	1.19126	1.10052	1.18112	1.23438	1.24436	1.21681	1.21243	1.22079	1.18923	1.24992	1.16205		1.82654	1.76865	2.07057	1.97044	1.88139	1.78989
	13.4753	1.35094	1.35334	1.49123	1.41982	1.47996	1.49769	1.47734	1.44664	1.44947	1.48166	1.49599	1.50569	1.44019	1.44186	1.43766	1.44019	1.36373	1.36345	1.30872	1.05602		1.11118	1.13042	1.17481	1.17876	1.20217	1.08657	1.2231	1.12499	1.18553	1.18989	1.09932	1.17907	1.23113	1.23812	1.21459	1.21026	1.21919	1.19177	1.24787	1.16036		1.81662	1.762	2.06232	1.95854	1.87572	1.78661
	13.9753	1.35145	1.35284	1.48971	1.4189	1.47565	1.49704	1.47495	1.44598	1.44667	1.47678	1.49469	1.50481	1.43753	1.44073	1.42944	1.4394	1.36212	1.3638	1.30905	1.05826		1.10001	1.12708	1.16838	1.17538	1.1987	1.08533	1.22059	1.12314	1.18227	1.18984	1.09737	1.17662	1.22931	1.23587	1.21446	1.20985	1.21921	1.19392	1.24743	1.15932		1.80277	1.75658	2.05909	1.95683	1.87339	1.78351
	14.4753	1.34854	1.35467	1.48612	1.41535	1.47371	1.49099	1.47329	1.442	1.44023	1.4674	1.4938	1.5036	1.43373	1.43756	1.42775	1.43907	1.35911	1.36178	1.30852	1.05859		1.10363	1.1278	1.16847	1.17386	1.19744	1.08367	1.21877	1.12045	1.18059	1.18753	1.09541	1.17494	1.22609	1.2309	1.21289	1.20795	1.21772	1.19468	1.24647	1.15759		1.79834	1.75794	2.0541	1.95446	1.87407	1.78127
	14.9753	1.34978	1.35545	1.48566	1.41518	1.46806	1.49009	1.4719	1.43677	1.43545	1.4572	1.49178	1.50439	1.43222	1.43223	1.42931	1.437	1.35738	1.35983	1.30749	1.05948		1.0903	1.13007	1.16806	1.17086	1.19177	1.08277	1.21807	1.12014	1.17806	1.18432	1.09373	1.17305	1.22836	1.23205	1.21537	1.20367	1.21495	1.19312	1.24644	1.15707		1.78355	1.75042	2.0492	1.94998	1.86705	1.77952
	15.4753	1.34926	1.35542	1.48604	1.41553	1.46831	1.48269	1.46976	1.43561	1.43098	1.44717	1.49193	1.50289	1.42713	1.43245	1.42982	1.43807	1.35675	1.35835	1.30784	1.05942		1.09322	1.12468	1.17018	1.16685	1.1902	1.07921	1.21706	1.11772	1.17585	1.18183	1.09223	1.16982	1.23066	1.23052	1.21302	1.2043	1.21513	1.19291	1.24753	1.15573		1.76753	1.74615	2.04285	1.94418	1.86705	1.77744
	15.9753	1.34749	1.35717	1.4828	1.41206	1.46464	1.48064	1.46952	1.43184	1.42594	1.43818	1.49237	1.50366	1.4181	1.4263	1.42904	1.4354	1.35262	1.35801	1.30778	1.05997		1.08874	1.12274	1.16746	1.16775	1.18567	1.07836	1.21542	1.11621	1.17467	1.18099	1.09014	1.16706	1.22707	1.2305	1.21325	1.20312	1.21503	1.19088	1.24564	1.15417		1.75846	1.743	2.03362	1.93551	1.86295	1.77582
[truncated: 23 more columns]

## Sheet: Figure 1 - Supplement 3C
	Time (Min)	Cell 1	Cell 2	Cell 3	Cell 4	Cell 5	Cell 6	Cell 7	Cell 8	Cell 9	Cell 10	Cell 11	Cell 12	Cell 13	Cell 14	Cell 15	Cell 16	Cell 17	Cell 18	Cell 19	Cell 20	Cell 21	Cell 22	Cell 23	Cell 24	Cell 25	Cell 26	Cell 27	Cell 28	Cell 29	AVERAGE	SEM
	-5.82458	0.949862	0.93016	0.89881	0.974521	0.974939	0.986642	0.992343	0.967402	0.966122	0.967464	0.865065	1.01173	0.97046	0.994409	0.986519	0.932903	0.91936	0.902124	0.923241	0.913757	0.992659	0.962331	0.93881	0.951251	0.921699	0.897154	0.956453	0.880563	0.959472	0.94787	0.00693525
	-5.32458	0.957285	0.940762	0.912408	0.976494	0.97789	0.988781	0.994046	0.970228	0.96909	0.975996	0.873041	1.01013	0.971255	0.995392	0.989402	0.944959	0.930738	0.915029	0.927451	0.922443	0.995514	0.967813	0.94329	0.955096	0.926123	0.90564	0.964969	0.895981	0.960758	0.953724	0.00630387
	-4.82458	0.960743	0.945678	0.926869	0.984016	0.977566	0.98865	0.992248	0.973101	0.96991	0.978373	0.883387	1.00921	0.97408	0.996029	0.992485	0.95528	0.935131	0.931424	0.936335	0.932709	0.998337	0.974154	0.952224	0.962197	0.936496	0.918007	0.970283	0.908027	0.967277	0.959663	0.00556747
	-4.32458	0.963627	0.954218	0.933322	0.986498	0.979547	0.989012	0.994025	0.975628	0.972957	0.983266	0.89236	1.01126	0.977387	0.997117	0.993707	0.951846	0.938725	0.941141	0.943629	0.944596	1.00147	0.978956	0.953708	0.967679	0.945691	0.921618	0.978718	0.919866	0.970632	0.964214	0.00515869
	-3.82458	0.964394	0.962412	0.948823	0.988705	0.982131	0.989078	0.991462	0.978736	0.97475	0.991323	0.90167	1.00955	0.978764	0.997698	0.995881	0.955353	0.944387	0.950843	0.949235	0.949566	0.998271	0.980958	0.957906	0.969514	0.950003	0.932818	0.983045	0.932739	0.973366	0.968392	0.00451993
	-3.32458	0.969571	0.968461	0.959621	0.990533	0.984145	0.990063	0.991407	0.982403	0.977312	0.994314	0.914216	1.00791	0.980563	0.999355	0.997868	0.967148	0.951582	0.957118	0.954893	0.957853	0.998603	0.980602	0.961187	0.973997	0.954669	0.938561	0.983709	0.941501	0.977204	0.972633	0.00395136
	-2.82458	0.971077	0.976524	0.969667	0.996037	0.98544	0.991871	0.993409	0.986377	0.982068	1.0001	0.93028	1.00892	0.98531	0.999897	0.999115	0.981263	0.953683	0.962196	0.963345	0.964681	1.00116	0.985986	0.967773	0.979179	0.965031	0.947056	0.987904	0.95697	0.979923	0.978353	0.00339025
	-2.32458	0.972676	0.977482	0.975112	0.991075	0.988471	0.991452	0.992454	0.986357	0.982734	1.0025	0.943438	1.00781	0.989865	1.00357	1.00125	0.976502	0.961228	0.970302	0.97064	0.972428	0.997455	0.989832	0.972599	0.982374	0.978263	0.957907	0.990176	0.968297	0.983696	0.981998	0.00272467
	-1.82458	0.981046	0.985223	0.987865	1.00249	0.989762	0.994976	0.996369	0.990967	0.987859	1.00571	0.955354	1.00638	0.99205	1.00381	1.00403	0.997335	0.96959	0.976127	0.975496	0.977016	0.999927	0.992066	0.976288	0.985415	0.978367	0.962311	0.994681	0.976768	0.988865	0.987384	0.00240513
	-1.32458	0.980075	0.992724	0.99109	1.00028	0.989852	0.992795	0.993335	0.991401	0.986709	1.00591	0.969855	1.00633	0.994072	1.00449	1.00272	0.997027	0.977968	0.983184	0.98415	0.986132	1.00116	0.994995	0.982061	0.991932	0.980298	0.972803	0.993132	0.982406	0.989631	0.990293	0.00176137
EGF Addition	0	1	1	1	1	1	1	1	1	1	1	1	1	1	1	1	1	1	1	1	1	1	1	1	1	1	1	1	1	1	1	0
	0.479458	1.00369	1.03139	1.01639	1.01807	1.00404	1.00626	0.999189	1.00063	1.00486	1.01235	1.02787	1.01276	1.01191	1.00992	1.00765	1.01945	1.00838	1.00767	1.00929	1.00638	1.00806	1.00206	1.00666	1.00324	1.01122	1.00849	1.00227	1.00578	1.0044	1.00932	0.00138584
	0.979458	1.00034	1.02891	1.01146	1.02267	1.00598	1.0052	0.999203	1.00077	1.00316	1.01208	1.04174	1.01584	1.02145	1.01078	1.00667	1.01095	1.02385	1.01371	1.01772	1.01458	1.00771	1.00822	1.01435	1.00774	1.02197	1.02662	1.02181	1.01498	1.01242	1.01389	0.00177553
	1.47946	0.99864	1.02589	1.01734	1.01986	1.0051	1.00721	1.00302	1.00195	1.00485	1.02302	1.06222	1.02852	1.02799	1.0153	1.0083	1.01963	1.03343	1.01834	1.02141	1.01797	1.01109	1.01059	1.02129	1.00806	1.03129	1.07342	1.13691	1.03465	1.02955	1.02472	0.00504017
	1.97946	1.00041	1.03253	1.02276	1.02703	1.00591	1.01095	1.00298	1.00492	1.00863	1.06489	1.08489	1.05199	1.045	1.02389	1.02271	1.02102	1.04598	1.02107	1.02677	1.02182	1.01057	1.00994	1.02539	1.01033	1.06506	1.2468	1.36308	1.09993	1.12135	1.05168	0.0144351
	2.47946	1.02058	1.03492	1.04812	1.06173	1.00976	1.037	1.02066	1.02034	1.02069	1.17677	1.12637	1.11644	1.08245	1.04011	1.09611	1.02591	1.05999	1.02018	1.03005	1.02602	1.01654	1.01733	1.03188	1.01044	1.18842	1.539	1.52725	1.2213	1.35378	1.10276	0.0264663
	2.97946	1.05381	1.05819	1.11137	1.15625	1.01364	1.08076	1.07631	1.05269	1.03717	1.34452	1.18173	1.21603	1.14228	1.06523	1.27041	1.02723	1.07503	1.02392	1.03671	1.03152	1.02945	1.02285	1.03847	1.01307	1.37379	1.75699	1.56616	1.31912	1.61854	1.16528	0.0366987
	3.47946	1.13034	1.08768	1.22767	1.34627	1.02164	1.16951	1.20421	1.11329	1.07566	1.52561	1.25582	1.34652	1.22505	1.10129	1.50782	1.0386	1.11536	1.03495	1.04908	1.0382	1.06389	1.04336	1.04947	1.02312	1.52691	1.83903	1.57448	1.35298	1.76624	1.23635	0.0429616
	3.97946	1.2136	1.1293	1.37659	1.59085	1.03122	1.27967	1.39017	1.19665	1.13201	1.65576	1.32598	1.47523	1.32181	1.14742	1.68254	1.06753	1.20962	1.05757	1.07445	1.05463	1.12345	1.08444	1.06859	1.04957	1.58923	1.84496	1.5747	1.35921	1.82228	1.3079	0.0461756
	4.47946	1.29268	1.19335	1.48356	1.81014	1.04517	1.40362	1.57728	1.28244	1.2115	1.73742	1.38291	1.59415	1.41947	1.20035	1.7608	1.1356	1.37863	1.11712	1.12249	1.09089	1.23626	1.15955	1.09762	1.10926	1.61618	1.85189	1.5763	1.36106	1.83675	1.38222	0.0471743
	4.97946	1.36961	1.27057	1.55214	1.95875	1.06543	1.52374	1.71528	1.35494	1.30754	1.77037	1.42303	1.67277	1.50211	1.24592	1.78211	1.21981	1.5738	1.19923	1.19334	1.14263	1.39145	1.26056	1.13912	1.20395	1.61082	1.8563	1.571	1.36098	1.8317	1.45066	0.0459686
	5.47946	1.40439	1.3331	1.57448	2.04192	1.0926	1.62295	1.7892	1.40582	1.40987	1.79211	1.45245	1.73634	1.57053	1.28984	1.79	1.33803	1.72273	1.2838	1.27891	1.214	1.56367	1.3769	1.18695	1.31283	1.61555	1.84181	1.57357	1.36151	1.8354	1.51073	0.0438883
	5.97946	1.43285	1.39038	1.58614	2.07402	1.12149	1.68684	1.8145	1.43552	1.49147	1.79489	1.46418	1.75835	1.61377	1.32671	1.78479	1.43359	1.8052	1.35443	1.37427	1.30267	1.70855	1.49584	1.24495	1.40865	1.61387	1.84742	1.57717	1.36013	1.83651	1.55652	0.041285
	6.47946	1.4411	1.43109	1.58479	2.08713	1.15714	1.73469	1.82881	1.45069	1.55707	1.80028	1.47056	1.77594	1.65289	1.35903	1.78799	1.52494	1.84263	1.38507	1.46197	1.38714	1.80517	1.60048	1.29881	1.47461	1.61343	1.84336	1.57933	1.36089	1.83752	1.59085	0.0394025
	6.97946	1.44681	1.4519	1.58246	2.10695	1.19141	1.76261	1.83088	1.45803	1.60296	1.78879	1.46848	1.78483	1.67504	1.37997	1.78062	1.5536	1.8559	1.41019	1.53545	1.45525	1.8801	1.67626	1.34831	1.50992	1.6175	1.84035	1.58427	1.36182	1.83409	1.61292	0.038328
	7.47946	1.43959	1.45872	1.5865	2.09828	1.23187	1.77477	1.82141	1.45992	1.62598	1.78291	1.46366	1.78915	1.6892	1.39649	1.77986	1.59275	1.85631	1.41192	1.58516	1.51097	1.92701	1.72873	1.38776	1.5285	1.61883	1.84372	1.58814	1.36044	1.83547	1.62669	0.037372
	7.97946	1.45369	1.45554	1.5853	2.10112	1.27243	1.78756	1.82774	1.46417	1.64318	1.7711	1.45953	1.78601	1.69737	1.40493	1.77151	1.6061	1.85486	1.41596	1.62484	1.55105	1.93897	1.76044	1.42069	1.53805	1.61132	1.84423	1.59249	1.35404	1.83633	1.63554	0.0365859
	8.47946	1.44775	1.46001	1.58987	2.10071	1.31068	1.78958	1.82402	1.46737	1.64961	1.7607	1.45729	1.78327	1.70126	1.41345	1.76946	1.62036	1.86031	1.41501	1.64959	1.57574	1.95196	1.78092	1.4429	1.54165	1.61187	1.84324	1.59875	1.35955	1.82798	1.64155	0.0358947
	8.97946	1.45161	1.46009	1.59225	2.10114	1.34119	1.78303	1.8181	1.46255	1.64872	1.75286	1.44343	1.7739	1.70406	1.42003	1.76377	1.60639	1.8572	1.41554	1.66437	1.58677	1.96807	1.79124	1.45988	1.54168	1.60491	1.83956	1.60019	1.35687	1.8252	1.64257	0.0355217
	9.47946	1.44485	1.44704	1.58939	2.10064	1.37633	1.78174	1.81742	1.46197	1.65014	1.73524	1.43618	1.77409	1.70656	1.42038	1.75808	1.612	1.85677	1.41507	1.67281	1.59376	1.98306	1.80614	1.46897	1.54695	1.61127	1.83922	1.60382	1.35916	1.81762	1.64437	0.035349
	9.97946	1.44636	1.45281	1.5955	2.09434	1.40349	1.77582	1.81934	1.46119	1.65126	1.72447	1.42307	1.75927	1.69859	1.41831	1.74416	1.61181	1.84304	1.40644	1.67635	1.59511	1.97645	1.80584	1.46961	1.54559	1.59795	1.82518	1.60541	1.35159	1.81467	1.64114	0.0347564
	10.4795	1.43863	1.44007	1.59747	2.08817	1.4347	1.77456	1.82081	1.46294	1.65287	1.70456	1.41205	1.75329	1.69324	1.41702	1.73386	1.59074	1.84428	1.40149	1.67352	1.59207	1.97305	1.80097	1.47089	1.54754	1.59738	1.83327	1.60757	1.34834	1.80476	1.63828	0.0345408
	10.9795	1.43638	1.44296	1.59207	2.08553	1.44988	1.75843	1.81101	1.45594	1.64498	1.69566	1.39931	1.74126	1.69004	1.41053	1.72315	1.61803	1.84752	1.40224	1.67761	1.59273	1.97873	1.79335	1.4705	1.54724	1.59546	1.81676	1.60872	1.35013	1.79517	1.63556	0.0341831
	11.4795	1.42632	1.43792	1.59	2.07508	1.47251	1.75718	1.81477	1.45573	1.64854	1.67881	1.38258	1.72711	1.67921	1.40199	1.70707	1.60081	1.83131	1.39194	1.67394	1.59069	1.98062	1.79351	1.46502	1.54563	1.59147	1.81763	1.60994	1.33882	1.78455	1.63002	0.0341791
	11.9795	1.42335	1.43393	1.58863	2.07813	1.48336	1.74321	1.8136	1.4492	1.64502	1.65775	1.37038	1.71299	1.66986	1.39738	1.69636	1.60204	1.83898	1.39105	1.67225	1.58699	1.97807	1.78322	1.46478	1.54918	1.58864	1.80571	1.60948	1.3332	1.77029	1.62542	0.0340891
	12.4795	1.41628	1.42231	1.58342	2.07571	1.49884	1.73708	1.80977	1.44981	1.64457	1.63124	1.35978	1.70194	1.66084	1.38693	1.68091	1.64796	1.84616	1.38859	1.67473	1.58311	1.97694	1.78145	1.45394	1.54745	1.58362	1.79814	1.60935	1.3246	1.75492	1.62174	0.0342498
	12.9795	1.41298	1.42141	1.57783	2.07041	1.51123	1.73395	1.81346	1.44841	1.64824	1.6166	1.34622	1.69324	1.65667	1.37822	1.66692	1.58245	1.83189	1.3725	1.66612	1.57955	1.96693	1.7669	1.44536	1.54821	1.57143	1.78394	1.61243	1.31606	1.73452	1.6129	0.0340963
	13.4795	1.39673	1.41336	1.57791	2.06582	1.51468	1.71597	1.80389	1.4404	1.64191	1.58498	1.32855	1.67968	1.63986	1.36623	1.64559	1.5792	1.81907	1.365	1.66311	1.57125	1.96283	1.75887	1.43488	1.54772	1.5674	1.76763	1.607	1.30903	1.72533	1.60324	0.0341387
	13.9795	1.39225	1.41372	1.57786	2.07206	1.52237	1.71338	1.8068	1.44008	1.64613	1.56671	1.31696	1.66943	1.62801	1.36062	1.62769	1.63881	1.82498	1.36576	1.66268	1.56999	1.97156	1.76098	1.42774	1.5488	1.54708	1.74429	1.59662	1.29665	1.70205	1.60042	0.0345553
	14.4795	1.37451	1.38357	1.56997	2.04896	1.52062	1.69602	1.80002	1.43174	1.6349	1.53823	1.29834	1.64662	1.61197	1.3485	1.6056	1.59966	1.80854	1.34824	1.65512	1.56171	1.96181	1.7478	1.41503	1.54602	1.55176	1.73245	1.597	1.28634	1.6869	1.58648	0.0345165
	14.9795	1.35434	1.38968	1.56902	2.04532	1.52723	1.69029	1.79544	1.42703	1.63555	1.51517	1.28708	1.63603	1.59567	1.33714	1.58992	1.56785	1.79083	1.34118	1.65569	1.55335	1.95127	1.73544	1.39877	1.54563	1.54198	1.71409	1.59367	1.27166	1.66876	1.57673	0.034571
	15.4795	1.34325	1.38068	1.55775	2.03614	1.52855	1.67963	1.78728	1.4246	1.63224	1.48543	1.27003	1.61269	1.57731	1.32673	1.56274	1.57981	1.78799	1.32889	1.65376	1.54547	1.94351	1.73087	1.38968	1.5449	1.5203	1.68699	1.58724	1.25822	1.64558	1.5658	0.0347343
	15.9795	1.33354	1.38025	1.55288	2.02753	1.5326	1.67228	1.79092	1.4169	1.63507	1.46861	1.25588	1.60059	1.56441	1.31736	1.54687	1.60233	1.78809	1.3248	1.64854	1.54266	1.94115	1.72115	1.37623	1.54191	1.51835	1.67772	1.57964	1.24661	1.62718	1.55973	0.0350561
	16.4795	1.32094	1.36925	1.54825	2.02524	1.53332	1.66584	1.78667	1.41682	1.63384	1.44914	1.2447	1.58105	1.54591	1.30771	1.5246	1.61588	1.77681	1.31499	1.6468	1.53312	1.93117	1.71147	1.36518	1.54137	1.5081	1.65982	1.57313	1.23624	1.60582	1.5508	0.0352915
	16.9795	1.30494	1.35629	1.53935	1.9925	1.52937	1.6439	1.77531	1.40417	1.62415	1.42425	1.23147	1.56666	1.53191	1.29692	1.50317	1.60908	1.76598	1.30278	1.64644	1.52882	1.92528	1.70149	1.35398	1.53769	1.5005	1.63411	1.56094	1.22355	1.58583	1.53796	0.0351117
	17.4795	1.30101	1.34839	1.53137	1.99403	1.5332	1.64333	1.77835	1.40611	1.62985	1.40465	1.22122	1.54733	1.51769	1.28452	1.48546	1.61001	1.76312	1.29314	1.63959	1.5231	1.9172	1.69754	1.33952	1.53349	1.48077	1.6142	1.55358	1.21172	1.56107	1.52981	0.0356134
	17.9795	1.29205	1.34204	1.52124	1.97603	1.52994	1.63532	1.77162	1.39961	1.6278	1.38395	1.20482	1.53076	1.5017	1.2755	1.46725	1.59686	1.75532	1.27816	1.63668	1.51918	1.91332	1.69474	1.32577	1.53113	1.46688	1.59438	1.54386	1.1939	1.54208	1.51903	0.0359164
	18.4795	1.2724	1.32931	1.5109	1.95161	1.52624	1.62791	1.7626	1.39136	1.6213	1.36638	1.18945	1.51905	1.48713	1.26933	1.448	1.58259	1.74518	1.26633	1.62911	1.51286	1.90958	1.68031	1.31455	1.52623	1.45845	1.58064	1.53175	1.18706	1.52259	1.50759	0.0359254
	18.9795	1.26054	1.32043	1.50708	1.94281	1.5283	1.63199	1.75876	1.388	1.62667	1.34771	1.17954	1.50562	1.46885	1.25941	1.43063	1.56275	1.7342	1.25194	1.62535	1.50712	1.90402	1.67411	1.30163	1.52285	1.44674	1.55749	1.51668	1.17331	1.50403	1.49788	0.036328
	19.4795	1.262	1.31239	1.49423	1.91896	1.52642	1.62688	1.75251	1.37854	1.623	1.32814	1.16893	1.48979	1.45273	1.24985	1.41204	1.57181	1.71884	1.24338	1.62124	1.50456	1.88941	1.66747	1.28761	1.51632	1.43223	1.5495	1.50735	1.16151	1.48876	1.48815	0.0362335
	19.9795	1.24648	1.30871	1.47804	1.89464	1.52279	1.6143	1.73908	1.36928	1.61733	1.31312	1.15678	1.47545	1.43735	1.23889	1.39577	1.56281	1.71039	1.22888	1.61269	1.4968	1.88208	1.65743	1.27224	1.51095	1.41628	1.52468	1.49279	1.15195	1.46603	1.47566	0.0362148
	20.4795	1.24667	1.30318	1.47011	1.87564	1.52553	1.61518	1.73625	1.36865	1.61612	1.29846	1.1483	1.45989	1.42584	1.2288	1.38092	1.55365	1.69941	1.22157	1.60987	1.493	1.86768	1.6466	1.2617	1.50735	1.39688	1.50409	1.48201	1.13994	1.44743	1.46658	0.0361531
	20.9795	1.23492	1.29129	1.44972	1.84343	1.51784	1.59237	1.72364	1.35936	1.60645	1.27764	1.13704	1.44529	1.41111	1.22128	1.36886	1.55728	1.68196	1.20661	1.59988	1.49013	1.86056	1.63083	1.25129	1.49838	1.37611	1.49024	1.46875	1.12823	1.42862	1.45342	0.0359524
	21.4795	1.23701	1.2819	1.44076	1.82695	1.51683	1.58489	1.71624	1.35474	1.60617	1.26259	1.12948	1.43476	1.39775	1.21257	1.35397	1.52859	1.67388	1.19627	1.59087	1.48613	1.85786	1.61733	1.23995	1.49004	1.36432	1.46923	1.45952	1.11914	1.41496	1.44361	0.0359328
	21.9795	1.23287	1.26958	1.42574	1.80395	1.51427	1.57854	1.70739	1.35263	1.60571	1.24836	1.12034	1.42006	1.38334	1.20307	1.33781	1.52235	1.66392	1.18965	1.58625	1.47811	1.84822	1.6038	1.2302	1.48503	1.34914	1.45635	1.44218	1.11237	1.40089	1.43352	0.0358421
	22.4795	1.2347	1.26754	1.41197	1.7761	1.50714	1.56661	1.6937	1.3474	1.60075	1.23332	1.11533	1.41054	1.36869	1.19274	1.32703	1.512	1.6517	1.1792	1.57756	1.47527	1.83541	1.58845	1.21683	1.47094	1.33092	1.44058	1.42903	1.1084	1.38832	1.4227	0.0353769
	22.9795	1.22627	1.26401	1.40219	1.75812	1.50681	1.5591	1.6826	1.34204	1.59757	1.22327	1.11251	1.40294	1.3611	1.18602	1.31469	1.50241	1.65193	1.17263	1.5711	1.47409	1.82054	1.57512	1.20871	1.46574	1.31495	1.43333	1.41722	1.10012	1.37478	1.41455	0.0352035
	23.4795	1.23282	1.25559	1.3822	1.73447	1.50213	1.5528	1.67136	1.33886	1.5946	1.21313	1.10484	1.3932	1.34897	1.1777	1.30293	1.4983	1.62371	1.1575	1.56188	1.46774	1.81174	1.56033	1.19943	1.45309	1.30767	1.40892	1.40459	1.09506	1.35939	1.40396	0.0348103
	23.9795	1.23508	1.24878	1.37217	1.70808	1.50522	1.55316	1.66366	1.33986	1.59857	1.19507	1.09619	1.37932	1.33866	1.16832	1.2905	1.49311	1.62858	1.14851	1.55361	1.46509	1.80271	1.5475	1.1884	1.44324	1.28594	1.39909	1.38896	1.08565	1.34545	1.39547	0.034986
	24.4795	1.23956	1.24587	1.36016	1.68581	1.50481	1.54699	1.6543	1.3357	1.60103	1.18743	1.09193	1.36839	1.33058	1.16427	1.28117	1.4919	1.61398	1.13659	1.54462	1.46005	1.78727	1.53589	1.18134	1.43527	1.27262	1.3887	1.38092	1.07853	1.33502	1.38761	0.0346634
	24.9795	1.24002	1.23299	1.34124	1.65884	1.50059	1.53944	1.64837	1.33402	1.59519	1.17741	1.0888	1.36431	1.32022	1.15834	1.27404	1.46034	1.61273	1.13447	1.53409	1.45849	1.78004	1.52686	1.17281	1.42389	1.26158	1.37082	1.3669	1.07081	1.32274	1.37829	0.0344057
	25.4795	1.24941	1.23126	1.33528	1.63984	1.49759	1.53082	1.63476	1.33361	1.59634	1.16578	1.0843	1.34814	1.30957	1.15339	1.26504	1.45317	1.60134	1.1292	1.52673	1.45492	1.76948	1.51574	1.16529	1.41257	1.25334	1.35839	1.35506	1.06989	1.31291	1.3708	0.0340243
	25.9795	1.24743	1.21287	1.31896	1.61036	1.49423	1.52536	1.62598	1.32908	1.59315	1.15712	1.08153	1.33961	1.2991	1.14776	1.25944	1.43611	1.58939	1.11657	1.51642	1.44761	1.75171	1.5031	1.15668	1.40253	1.23823	1.34524	1.34678	1.06812	1.3013	1.36075	0.0336384
	26.4795	1.24841	1.21476	1.30013	1.58663	1.48603	1.51628	1.60938	1.3243	1.58587	1.14233	1.07581	1.32974	1.29194	1.14344	1.25292	1.41687	1.58576	1.11251	1.50834	1.44425	1.73597	1.49511	1.14892	1.39369	1.21864	1.33374	1.33287	1.06351	1.29128	1.35136	0.0332378
	26.9795	1.25036	1.21026	1.29246	1.56431	1.48758	1.51467	1.60144	1.32272	1.58691	1.13789	1.07503	1.32366	1.28413	1.13705	1.24738	1.41763	1.57934	1.10595	1.49922	1.44265	1.72214	1.49018	1.14209	1.38209	1.2184	1.31842	1.32572	1.056	1.2841	1.34551	0.0330214
	27.4795	1.25425	1.20959	1.28263	1.55	1.48533	1.51027	1.5905	1.31955	1.58785	1.12608	1.0722	1.3125	1.27592	1.13144	1.24055	1.41827	1.56996	1.09754	1.4885	1.43455	1.70527	1.47894	1.13453	1.37377	1.20359	1.30937	1.31253	1.04725	1.27558	1.33787	0.0328656
	27.9795	1.24941	1.20216	1.26268	1.52625	1.48134	1.49757	1.57499	1.31766	1.58667	1.11792	1.06625	1.30433	1.27026	1.12718	1.23695	1.38932	1.55616	1.09426	1.47906	1.43136	1.69194	1.47159	1.12849	1.36432	1.18549	1.29134	1.30356	1.0455	1.26902	1.32838	0.0324438
	28.4795	1.25693	1.19653	1.25765	1.51159	1.4813	1.49685	1.56736	1.32172	1.59138	1.10782	1.06631	1.29333	1.26204	1.12354	1.23339	1.40909	1.55542	1.08784	1.47086	1.43076	1.67824	1.46365	1.12341	1.35582	1.18659	1.2875	1.29489	1.03848	1.26076	1.32452	0.0324367
	28.9795	1.26238	1.19106	1.24473	1.49921	1.47948	1.49007	1.56147	1.3226	1.59339	1.10105	1.06328	1.28487	1.25697	1.1183	1.22891	1.37132	1.54172	1.08323	1.45815	1.42457	1.66561	1.45386	1.11788	1.3457	1.17416	1.27413	1.28591	1.0363	1.25865	1.31686	0.0321331
	29.4795	1.25577	1.18738	1.2309	1.47854	1.47325	1.47962	1.54656	1.32042	1.58725	1.09539	1.06039	1.27496	1.24975	1.11607	1.22436	1.32651	1.51264	1.07476	1.44442	1.41783	1.64636	1.44603	1.10824	1.33506	1.17104	1.27176	1.28183	1.0382	1.25099	1.30711	0.031333
	29.9795	1.26717	1.18766	1.22713	1.4631	1.47525	1.47941	1.54283	1.32327	1.59339	1.08439	1.06074	1.26909	1.24488	1.11009	1.22255	1.37003	1.52683	1.07146	1.43986	1.41862	1.64132	1.4439	1.10447	1.32832	1.16121	1.26533	1.27973	1.0365	1.25014	1.30651	0.03166
	30.4795	1.24982	1.17102	1.21397	1.44209	1.46458	1.46325	1.52408	1.31646	1.58436	1.07922	1.05409	1.25916	1.23893	1.10556	1.21945	1.35749	1.52181	1.07286	1.4299	1.40992	1.62493	1.43406	1.098	1.32057	1.15441	1.26366	1.2728	1.03382	1.2423	1.29733	0.0311084
	30.9795	1.2586	1.16809	1.20498	1.4353	1.47012	1.46331	1.52107	1.31919	1.59198	1.07495	1.05428	1.25399	1.23634	1.10432	1.21733	1.35517	1.50664	1.06934	1.41719	1.40509	1.61399	1.43295	1.09457	1.30949	1.15251	1.25846	1.2669	1.03288	1.23801	1.29404	0.0309913
	31.4795	1.25363	1.16352	1.19135	1.41624	1.46697	1.45454	1.51096	1.3165	1.59132	1.06551	1.05372	1.24544	1.23166	1.09956	1.21622	1.35017	1.51423	1.06923	1.40985	1.40085	1.60392	1.42694	1.08991	1.30158	1.15415	1.24344	1.26116	1.03787	1.23425	1.28878	0.0307914
	31.9795	1.24962	1.16453	1.18679	1.40483	1.46589	1.44633	1.49515	1.31463	1.59315	1.05821	1.05033	1.23999	1.22641	1.09668	1.21379	1.33369	1.50585	1.06443	1.39768	1.39669	1.59838	1.42253	1.08466	1.29408	1.14582	1.23988	1.25581	1.03166	1.2301	1.28302	0.0306471
	32.4795	1.25844	1.15547	1.17985	1.38935	1.46537	1.44178	1.48931	1.31421	1.591	1.05394	1.05199	1.23736	1.22363	1.09388	1.21464	1.33852	1.50114	1.05903	1.38985	1.39616	1.58782	1.41477	1.08062	1.28852	1.14665	1.22912	1.25554	1.03242	1.22877	1.27963	0.0304229
	32.9795	1.23832	1.14816	1.16526	1.37355	1.46134	1.43183	1.47459	1.30916	1.58659	1.04923	1.04821	1.22709	1.21935	1.08926	1.21315	1.3278	1.49726	1.0653	1.37825	1.39244	1.57986	1.41576	1.07845	1.28097	1.14227	1.23126	1.24861	1.03471	1.22704	1.27362	0.0300856
	33.4795	1.25165	1.15074	1.16436	1.37098	1.46507	1.43506	1.47072	1.31241	1.59528	1.04148	1.04969	1.22472	1.21458	1.08714	1.21092	1.30711	1.50857	1.06035	1.36865	1.38846	1.5688	1.41169	1.07308	1.27318	1.144	1.2236	1.24663	1.0334	1.22184	1.27152	0.0302468
	33.9795	1.23794	1.14438	1.15568	1.34808	1.45779	1.42514	1.45188	1.30871	1.58947	1.03285	1.05066	1.21657	1.20991	1.0845	1.21022	1.31298	1.49505	1.05884	1.36024	1.38226	1.56053	1.4095	1.06974	1.26629	1.13447	1.2173	1.24451	1.03305	1.22202	1.26519	0.0298216
	34.4795	1.23375	1.14205	1.1504	1.34585	1.45924	1.42837	1.44633	1.30953	1.59478	1.02861	1.05258	1.21175	1.20651	1.08252	1.20806	1.29134	1.49525	1.05676	1.35087	1.37713	1.55211	1.40623	1.06754	1.26081	1.13654	1.21514	1.24627	1.03481	1.22058	1.26247	0.0297801
	34.9795	1.22616	1.13731	1.1422	1.3309	1.45409	1.41808	1.42978	1.30458	1.58976	1.03052	1.05332	1.21096	1.20583	1.07898	1.2076	1.29221	1.49535	1.05718	1.34131	1.37216	1.54594	1.40408	1.06548	1.2549	1.13763	1.2	1.2457	1.03418	1.21639	1.25802	0.029408
	35.4795	1.22675	1.13708	1.13686	1.32679	1.46203	1.42376	1.42674	1.31134	1.59848	1.02367	1.05508	1.20469	1.20203	1.07389	1.20623	1.29889	1.49292	1.05834	1.33325	1.36855	1.53499	1.40079	1.06008	1.25023	1.13255	1.19175	1.24362	1.03332	1.2164	1.25625	0.0296407

## Sheet: Figure 1 - Supplement 3D-F
	Max EKAR4 Y/C Ratio				SAM40 Values				T1/2 Values (min)						Statistical significance calculated using one-way ANOVA of each condition compared to every other condition
	Cytoplasm	Nucleus	Plasma membrane		Cytoplasm	Nucleus	Plasma membrane		Cytoplasm	Nucleus	Plasma membrane				MAX Y/C Ratio Comparisons between EKAR4 variants
	1.51549	1.45369	1.23425		0.278622	0.442708	0.81526		4.30667	3.97933	4.97983				Number of families	1
	1.47319	1.46009	1.17063		0.490632	0.262777	0.740798		7.05667	4.97933	8.97983				Number of comparisons per family	3
	1.72313	1.59747	1.12636		0.611421	0.157274	0.838342		2.55667	3.97933	14.9798				Alpha	0.05
	1.71097	2.10695	1.31873		0.381215	0.245649	0.69767		3.55667	3.97933	4.97983
	1.87362	1.53332	1.17797		0.447589	0.857294	0.778106		4.8415	7.97933	4.47983				Tukey's multiple comparisons test	Mean Diff.	95.00% CI of diff.	Significant?	Summary	Adjusted P Value
	1.57337	1.78958	1.13154		0.424115	0.525893	0.729129		5.3415	4.47933	6.97983
	1.74468	1.83088	1.10987		0.463908	0.43835	0.884459		5.8415	3.97933	28.4798				Cytoplasm vs. Nucleus	0.08456	-0.0001445 to 0.1693	No	ns	0.0505
	1.7865	1.46737	1.25266		0.31402	0.65308	0.855246		5.3415	3.97933	6.97983				Cytoplasm vs. Plasma membrane	0.502	0.4385 to 0.5655	Yes	****	<0.0001
	1.54559	1.65287	1.2556		0.363479	0.924711	0.883096		2.95533	4.97933	6.97983				Nucleus vs. Plasma membrane	0.4174	0.3309 to 0.504	Yes	****	<0.0001
	1.46688	1.80028	1.28849		0.557656	0.0295829	0.580888		2.95533	2.9795	3.98033
	1.47361	1.47056	1.38846		0.471583	0.117049	0.721275		2.95533	3.4795	3.48033
	1.91609	1.78915	1.33453		0.386482	0.259382	0.76923		3.95567	3.4795	3.48033				Test details	Mean 1	Mean 2	Mean Diff.	SE of diff.	n1	n2	q	DF
	1.56264	1.70656	1.29942		0.161648	0.285942	0.88804		3.95567	3.9795	3.48033
	1.84553	1.42038	1.2695		0.439848	0.175779	0.882366		3.45533	4.4795	9.48				Cytoplasm vs. Nucleus	1.745	1.661	0.08456	0.03584	83	29	3.336	180
	1.73257	1.79	1.25159		0.330796	0.261046	0.84708		4.45567	3.4795	4.98				Cytoplasm vs. Plasma membrane	1.745	1.243	0.502	0.02686	83	71	26.43	180
	1.73281	1.64796	1.1411		0.640052	0.396743	0.81752		5.48417	5.4795	10.98				Nucleus vs. Plasma membrane	1.661	1.243	0.4174	0.03662	29	71	16.12	180
	1.43155	1.86031	1.25976		0.766716	0.558615	0.960271		6.48417	4.4795	8.48
	1.73486	1.41596	1.20459		0.505134	0.14647	0.778987		3.97983	4.9795	7.98
	1.84423	1.67761	1.37316		0.449594	0.374955	0.871163		5.98417	5.9795	6.98				SAM40 Comparisons between EKAR4 variants
	1.71752	1.59511	1.26753		0.364552	0.565761	0.909869		5.48417	5.9795	6.98				Number of families	1
	1.74481	1.98306	1.26694		0.547121	0.487927	0.917338		4.98417	5.4795	7.98				Number of comparisons per family	3
	1.63964	1.80614	1.22913		0.749859	0.474265	0.76267		5.98417	5.4795	3.47917				Alpha	0.05
	1.41589	1.47089	1.17349		0.60178	0.085065	0.628109		5.98417	5.9795	3.97917
	1.78904	1.54918	1.29672		0.627182	0.369967	0.880638		5.98417	5.4795	2.97917				Tukey's multiple comparisons test	Mean Diff.	95.00% CI of diff.	Significant?	Summary	Adjusted P Value
	1.94568	1.61883	1.2945		0.608025	0.177715	0.787164		5.98417	2.9795	5.47917
	1.97021	1.8563	1.36748		0.464132	0.165387	0.87672		4.47983	2.4795	5.47917				Cytoplasm vs. Nucleus	0.1166	0.04003 to 0.1931	Yes	**	0.0012
	1.585	1.61243	1.3129		0.570222	0.361498	0.932206		8.48417	1.9795	7.97917				Cytoplasm vs. Plasma membrane	-0.3142	-0.3721 to -0.2563	Yes	****	<0.0001
	1.8032	1.36182	1.27997		0.457533	0.039463	0.882243		2.97983	2.4795	2.47917				Nucleus vs. Plasma membrane	-0.4308	-0.5091 to -0.3524	Yes	****	<0.0001
	1.57481	1.83752	1.32752		0.357342	0.257243	0.769625		3.47983	1.9795	2.47917
	2.01191		1.24926		0.316137		0.596987		1.97983		2.47917
	2.02353		1.27439		0.203665		0.694765		3.47983		3.47917				Test details	Mean 1	Mean 2	Mean Diff.	SE of diff.	n1	n2	q	DF
	1.85248		1.29498		0.451972		0.75964		3.97983		3.47917
	1.89666		1.16645		0.326089		0.613892		3.97983		4.47917				Cytoplasm vs. Nucleus	0.4648	0.3482	0.1166	0.03238	82	29	5.091	177
	1.82329		1.28507		0.230206		0.810212		3.48017		3.47917				Cytoplasm vs. Plasma membrane	0.4648	0.7789	-0.3142	0.02448	82	69	18.15	177
	1.93354		1.32712		0.454571		0.868651		2.98017		6.97917				Nucleus vs. Plasma membrane	0.3482	0.7789	-0.4308	0.03317	29	69	18.37	177
	1.78911		1.33161		0.806929		0.803952		4.48017		5.47917
	1.99102		1.1821		0.542825		0.8588		4.48017		7.97917
	1.58941		1.167		0.407478		0.796118		5.98017		3.9795				T1/2 (min) Comparisons between EKAR4 variants
	1.88711		1.20033		0.608314		0.689847		5.48017		4.9795				Number of families	1
	1.67227		1.19993		0.440361		0.787357		5.98017		4.9795				Number of comparisons per family	3
	1.62641		1.19524		0.353734		0.63844		4.48017		3.9795				Alpha	0.05
	1.94168		1.18927		0.61154		0.69905		4.98017		3.9795
	1.8835		1.26633		0.481827		0.647151		4.48017		3.4795				Tukey's multiple comparisons test	Mean Diff.	95.00% CI of diff.	Significant?	Summary	Adjusted P Value
	1.97752		1.2334		0.509979		0.749384		3.98017		5.4795
	1.68211		1.18974		0.544436		0.390534		3.47967		5.4795				Cytoplasm vs. Nucleus	0.04539	-0.8347 to 0.9255	No	ns	0.9918
	1.61827		1.15012		0.517612		0.821536		3.47967		5.4795				Cytoplasm vs. Plasma membrane	-0.9039	-1.571 to -0.2366	Yes	**	0.0046
	1.76538		1.23636		0.592362		0.757745		4.97967		3.47933				Nucleus vs. Plasma membrane	-0.9493	-1.854 to -0.04448	Yes	*	0.0373
	1.49866		1.32885		0.63432		0.682936		4.47967		3.97933
	1.91104		1.24552		0.375222		0.773506		3.47967		4.97933
	1.96534		1.16596		0.557326		0.692974		5.97967		5.47933				Test details	Mean 1	Mean 2	Mean Diff.	SE of diff.	n1	n2	q	DF
	2.01948		1.16085		0.664663		0.603457		5.97967		5.47933
	1.90251		1.17822		0.668842		0.335972		6.97967		3.97933				Cytoplasm vs. Nucleus	4.37	4.324	0.04539	0.3723	83	29	0.1724	177
	1.9549		1.17231		0.385089		0.753006		3.97967		5.97917				Cytoplasm vs. Plasma membrane	4.37	5.274	-0.9039	0.2823	83	68	4.528	177
	1.64472		1.23236		0.656574		0.858036		4.97967		6.47917				Nucleus vs. Plasma membrane	4.324	5.274	-0.9493	0.3828	29	68	3.507	177
	1.4805		1.22669		0.479863		0.697425		2.47983		6.97917
	1.56884		1.32933		0.557352		0.834104		1.97983		6.47917
	1.59627		1.31531		0.371002		0.849063		1.97983		8.97917
	1.78356		1.21304		0.455462		0.821218		2.97983		8.97917
	1.94928		1.12548		0.240948		0.807318		2.97983		11.9792
	1.86402		1.13553		0.283055		0.942369		2.47983		13.4792
	1.98088		1.29171		0.290842		0.659806		4.47983		3.97933
	1.80152		1.32098		0.464623		0.804311		3.97917		2.97933
	1.59971		1.23823		0.308194		0.768631		4.97917		2.97933
	1.39613		1.31252		0.471232		0.848832		3.97917		2.47933
	1.73592		1.25871		0.421048		0.736273		3.97917		3.47933
	1.90193		1.20774		0.424832		0.61172		3.47917		3.47933
	1.72957		1.21051		0.348266		0.864173		4.47917		4.47933
	2.02883		1.13218		0.543448		0.459697		3.97917		3.47933
	2.13781		1.1958		0.228368		0.654465		2.97917		3.97933
	2.08094		1.35929		0.275167		0.856013		3.47917		3.97933
	2.11232		1.37749		0.376857		0.888816		2.97917		3.47933
	1.45123				0.802907				6.97933
	1.64931				0.869469				4.47933
	1.74317				0.642033				6.47933
	1.80026				0.584456				8.97933
	1.54436				0.6079				3.47767
	1.98352				0.426052				2.97767
	1.8274				0.282976				2.97767
	2.03083				0.385734				3.47767
	1.61443				0.173609				3.47767
	1.48573				0.354361				3.47767
	1.22843				0.265342				4.4795
	1.02083				-0.51345				2.4795
