# Supplementary material for: Signaling diversity enabled by Rap1-regulated plasma membrane ERK with distinct temporal dynamics
Source: eLife. 2020 May 26;9:e57410. doi: 10.7554/eLife.57410 (PMC7289600; doi:10.7554/eLife.57410)
Supplement: Figure 2—source data 1. [file elife-57410-fig2-data1.xlsx]

## Sheet: Figure 2
Time course data presented is the Y/C FRET ratio of individual cells and the average and SEM value for each time point.
Due to occasional pausing and refocusing, some dish replicates may have values missing from certain time points.		SCH772984 addition at 10 min post EGF																												SCH772984 addition 40 minutes post-EGF
SEM - Standard Error of the Mean	Time (Min)	Cell 1	Cell 2	Cell 3	Cell 4	Cell 5	Cell 6	Cell 7	Cell 8	Cell 9	Cell 10	Cell 11	Cell 12	Cell 13	Cell 14	Cell 15	Cell 16	Cell 17	Cell 18	Cell 19	Cell 20	Cell 21	Cell 22	AVERAGE	SEM				Time (Min)	Cell 1	Cell 2	Cell 3	Cell 4	Cell 5	Cell 6	Cell 7	Cell 8	Cell 9	Cell 10	Cell 11	Cell 12	Cell 13	Cell 14	Cell 15	Cell 16	Cell 17	AVERAGE	SEM
	-5.47817	1.00255	0.961448	0.997919	0.969134	0.968944	1.00395	1.00851	0.985532	0.989888	0.983812	0.997663	1.00354	0.994547	0.98099	0.991581	0.98507	0.989208	1.00546	0.995211	1.00171	1.01821	1.01327	0.993097	0.00308969				-4.1515	1.01626	1.03943	1.03602	1.02633	1.03129	1.0382	0.986076	0.997702	1.01285	1.02657	1.00024	1.00597	1.00634	1.01443	0.985022	1.01169	1.01402	1.01461	0.00408085
	-5.46283	0.990671	0.970197	1.00008	0.968722	0.973814	1.00418	1.00957	0.990911	0.993186	0.981677	0.996248	1.00131	0.997456	0.980981	0.994734	0.982897	0.990154	0.997767	0.992144	0.999045	1.01589	1.00964	0.992785	0.0026654				-3.6515	1.01317	1.03426	1.03185	1.02585	1.02678	1.03317	0.994004	1.00078	1.01406	1.01693	1.01098	1.00529	1.00368	1.00235	0.98353	1.0091	1.01013	1.0127	0.00345664
	-4.96283	1.01076	0.977098	1.00899	0.980858	0.976213	1.00366	1.00767	0.996552	0.991302	0.98077	0.998144	1.00161	0.998754	0.98321	1.00582	1.0002	0.998303	1.00931	0.996237	1.00754	1.01767	1.01087	0.998252	0.00256094				-3.1515	1.00837	1.02765	1.03221	1.02302	1.02568	1.02952	0.977209	1.00018	1.01207	1.01011	1.00003	1.0113	1.0062	1.00991	0.985214	1.00629	1.00819	1.01019	0.00360055
	-4.46283	1.01023	0.983499	1.01201	0.984968	0.981136	1.004	1.00965	0.995039	0.995358	1.01939	1.00538	1.00616	1.00596	0.999294	1.0064	0.994202	0.992859	1.00088	0.995904	1.00434	1.01486	1.00983	1.00142	0.00216823				-2.6515	1.01638	1.02276	1.03017	1.01658	1.02037	1.02338	1	1	1	1.02395	1.00227	1.01224	1.00747	1.00795	0.988251	1.00862	1.00833	1.0111	0.00268909
	-3.96283	1.00371	0.983879	1.00966	0.990045	0.979345	1.00518	1.00888	0.998037	0.997721	0.987082	1.00149	1.00683	0.999587	0.99669	0.995217	0.989531	0.995046	1.00274	0.995222	1.00441	1.01605	1.01202	0.999017	0.00198578				-2.1515	1.01066	1.02015	1.01955	1.01032	1.01557	1.01794	0.995205	0.996987	0.999158	1.02054	1.00174	1.01127	0.994607	1.00912	0.992966	1.00352	1.00799	1.00749	0.00230286
	-3.46283	1.01288	0.99771	1.00553	0.993442	0.995769	1.00492	1.00919	1.00213	1.00254	0.996273	1.00291	1.00431	1.0012	0.998339	1.02572	1.00624	1.01301	1.01632	1.0055	1.00904	1.01809	1.01352	1.00612	0.00171694				-1.6515	1.01125	1.02032	1.01798	1.01129	1.01337	1.01797	0.993218	0.996847	0.993066	1.00892	1.00576	1.01993	1.01352	1.00356	0.993689	1.00672	1.00523	1.0078	0.00225142
	-2.96283	1.01671	1.0012	1.02063	0.999877	0.986735	1.00621	1.01202	1.00677	1.00011	1.00947	1.00427	1.00599	1.00227	1.00112	1.01053	1.00177	1.00181	1.00916	1.00065	1.00773	1.01589	1.01279	1.00608	0.0015611				-1.22583	1.00898	1.01603	1.02074	1.01102	1.0135	1.01856												1.01481	0.0018336
	-2.46283	1.01247	1.00285	1.02108	1.00208	1.00299	1.00661	1.01173	1.00605	1.00616	0.995136	1.00449	1.00847	1.00364	1.00163	1.02291	1.00721	1.01188	1.00451	1.00761	1.01036	1.01825	1.01413	1.00828	0.0014229			EGF addition	0	1	1	1	1	1	1	0.980812	0.996685	0.995731	1	1	1	1	1	1	1	1	0.998425	0.00114279
	-1.96283	1.01413	1.00419	1.01921	0.993604	1.00855	1.00751	1.01138	1.01117	1.0072	1.01257	1.00915	1.00465	1.00418	1.00397	0.995642	0.977554	0.990408	1.0024	0.994139	1.00207	1.01101	1.01157	1.00438	0.00200248				0.479389	0.996018	0.996929	1.00039	0.992758	0.998454	0.997341	0.997593	0.99625	0.992767	0.995051	1.00816	0.991543	1.00752	1.00246	1.0043	0.996261	0.994097	0.998111	0.00119935
	-1.46283	1	1	1	1	1	1	1	1	1	1	1	1	1	1	1	1	1	1	1	1	1	1	1	0				0.979389	0.994327	1.00024	0.993183	0.990244	0.999832	0.996417	0.996643	0.996194	0.995166	0.996844	1.00535	1.00374	1.00221	0.993816	0.999235	0.995706	0.991982	0.997125	0.00100429
EGF addition	0	1.0046	1.00324	1.00034	1.0099	0.999345	0.997637	0.996902	0.99862	0.996171	1.01268	0.998284	0.99734	0.994777	1.0033	1.0148	0.998325	1.0071	0.995868	0.997473	1.00041	1.01021	0.99761	1.00159	0.00124957				1.47939	0.989821	0.997617	0.996258	0.989986	1.00173	0.993801	0.976137	0.995651	0.995639	0.988874	0.999773	0.988797	0.996981	0.984803	0.998064	0.990985	0.98664	0.992444	0.00155157
	0.479833	1.01262	1.00287	1.01389	0.997969	0.997904	0.999812	0.996224	1.00465	0.999638	1.00439	1.00058	0.99986	0.997679	1.01257	1.01477	1.00147	1.00567	0.998826	1.00259	0.997968	1.0053	0.997465	1.00294	0.00122822				1.97939	1.01454	1.02196	1.00043	0.999595	1.00312	0.99437	0.999683	1.00031	1.00111	0.990241	0.991885	0.993819	0.995476	0.990413	0.999566	0.985357	0.983224	0.997947	0.00232717
	0.979833	1.01471	0.997656	1.01742	1.00163	1.02127	0.999248	0.996403	1.01474	0.997157	1.05003	1.003	0.999318	1.00339	1.01867	1.01299	0.999939	1.00252	0.993316	1.00347	0.998257	1.00537	0.997478	1.00673	0.00269933				2.47939	1.06782	1.06929	1.00754	1.00554	1.00518	0.997759	1.02867	1.00644	1.00802	1.0166	1.00038	1.04397	1.02126	0.996118	1.0053	0.993154	0.978283	1.01478	0.00604984
	1.47983	1.06007	1.00354	1.04123	1.02069	1.0788	0.998563	1.0001	1.04202	1.00204	1.11011	1.00648	1.0025	1.01714	1.03583	1.04587	1.00666	1.00348	1.00254	0.995257	1.00135	1.00993	1.00295	1.02214	0.00641156				2.97939	1.13544	1.13997	1.0156	1.01765	1.01015	1.00095	1.05211	1.01413	1.02277	1.07238	1.00017	1.12978	1.08411	1.02485	1.01214	1.00012	0.975679	1.04165	0.0125812
	1.97983	1.13206	1.00299	1.085	1.05925	1.14865	1.00633	1.01238	1.09593	1.00802	1.15946	1.01682	1.00716	1.05161	1.06893	1.09637	1.01879	1.04125	1.02675	1.00011	1.00909	1.02665	1.01368	1.04942	0.0106318				3.47939	1.18887	1.21201	1.0254	1.04088	1.01353	1.0092	1.06205	1.02689	1.04173	1.17148	1.01964	1.21037	1.16924	1.08755	1.04046	1.03259	0.972815	1.07792	0.0191824
	2.47983	1.20337	1.02409	1.15071	1.08953	1.18196	1.01884	1.04089	1.14906	1.02078	1.20142	1.03118	1.01059	1.10266	1.11771	1.16253	1.04487	1.10286	1.05511	1.00093	1.02402	1.05722	1.04032	1.08321	0.0140882				3.97939	1.22653	1.26263	1.04288	1.05991	1.01857	1.01991	1.09438	1.043	1.07088	1.19338	1.05308	1.22859	1.18399	1.15108	1.06732	1.08033	0.975525	1.10423	0.0208518
	2.97983	1.24188	1.04574	1.22209	1.10447	1.21019	1.04093	1.08255	1.19436	1.04934	1.20266	1.05376	1.01858	1.16024	1.16883	1.2302	1.09662	1.12971	1.10083	1.00789	1.05528	1.10772	1.08404	1.11854	0.0157193				4.47939	1.23786	1.2906	1.05824	1.0791	1.02452	1.03614	1.09979	1.06463	1.1045	1.22445	1.09259	1.23365	1.18577	1.20919	1.10438	1.12892	0.987932	1.12719	0.0211862
	3.47983	1.2717	1.06358	1.27822	1.12241	1.21817	1.06802	1.12043	1.20753	1.07775	1.19644	1.07695	1.0329	1.20838	1.20176	1.26341	1.12989	1.16262	1.15115	1.01582	1.09145	1.16795	1.13707	1.14834	0.0163059				4.97939	1.24327	1.31005	1.07919	1.08858	1.03369	1.05506	1.09585	1.08739	1.13764	1.21425	1.14812	1.23362	1.19631	1.24169	1.13066	1.17026	1.00511	1.14534	0.0206272
	3.97983	1.27072	1.07185	1.2996	1.1165	1.2275	1.09255	1.14969	1.21922	1.11276	1.22674	1.1093	1.0536	1.23839	1.21814	1.28394	1.15592	1.17407	1.18733	1.02343	1.1322	1.21896	1.19089	1.17151	0.0162164				5.47939	1.24153	1.31979	1.0931	1.10362	1.04541	1.07604	1.13295	1.11028	1.1743	1.21597	1.18789	1.24941	1.19918	1.25473	1.13719	1.19996	1.02697	1.16284	0.0196952
	4.47983	1.27648	1.09116	1.31872	1.12536	1.22384	1.11968	1.17313	1.22552	1.14986	1.24039	1.13897	1.07909	1.25576	1.22802	1.30056	1.16485	1.18521	1.20478	1.02741	1.16529	1.24725	1.22042	1.18917	0.0157626				5.97939	1.24581	1.32492	1.11669	1.11546	1.05872	1.0974	1.124	1.12971	1.20661	1.22324	1.21546	1.24905	1.19165	1.26662	1.1388	1.21043	1.04465	1.17407	0.0189129
	4.97983	1.27607	1.09088	1.3273	1.11426	1.22926	1.1397	1.1846	1.2306	1.17701	1.23203	1.16178	1.10017	1.26033	1.22544	1.28746	1.16244	1.19728	1.2233	1.02702	1.1993	1.26695	1.2532	1.19847	0.0154988				6.47939	1.24341	1.32713	1.13035	1.12371	1.07624	1.11815	1.11442	1.14794	1.23451	1.24192	1.21087	1.24303	1.18199	1.27417	1.13847	1.21686	1.06423	1.18161	0.0180142
	5.47983	1.28007	1.10057	1.33539	1.12784	1.22975	1.15531	1.19265	1.23833	1.20468	1.24149	1.18805	1.12705	1.26567	1.23071	1.29948	1.16845	1.17864	1.22118	1.03722	1.2209	1.27353	1.2613	1.2081	0.0149423				6.97939	1.25229	1.32973	1.1399	1.13319	1.09007	1.13486	1.12739	1.16118	1.25704	1.2374	1.23171	1.23772	1.19994	1.28015	1.13817	1.21637	1.07383	1.19064	0.0174444
	5.97983	1.28712	1.11023	1.33475	1.12449	1.23052	1.16715	1.19763	1.24294	1.22762	1.21923	1.20438	1.14909	1.26828	1.22744	1.3028	1.16572	1.19757	1.23804	1.04663	1.23826	1.27983	1.27623	1.21527	0.0145467				7.47939	1.26044	1.33576	1.154	1.14415	1.10542	1.15244	1.1341	1.17372	1.27746	1.25092	1.22897	1.24898	1.19915	1.28023	1.13758	1.22388	1.08352	1.19945	0.0171349
	6.47983										1.22636	1.21645	1.16586	1.267	1.22707	1.29987	1.16861	1.19864	1.23537	1.04912	1.24534	1.28242	1.28235	1.22034	0.0183593				7.97939	1.25329	1.33247	1.16662	1.15459	1.11982	1.16544	1.12632	1.18237	1.29026	1.26116	1.2242	1.25263	1.19813	1.27802	1.14188	1.22362	1.08713	1.20341	0.0165763
	6.97983	1.27154	1.12467	1.29326	1.14113	1.23763	1.18092	1.20287	1.22808	1.24236	1.25468	1.21803	1.18454	1.24679	1.21105	1.29216	1.18331	1.19744	1.21969	1.07084	1.24536	1.27763	1.27528	1.21815	0.0119112				8.47939	1.2501	1.33663	1.17484	1.16365	1.13521	1.17782	1.13772	1.18594	1.30354	1.23867	1.2296	1.24217	1.18856	1.27626	1.13809	1.22292	1.08746	1.20525	0.015958
	8.63367	1.27419	1.11529	1.29834	1.12819	1.21673	1.18223	1.20124	1.22817	1.23168	1.22874	1.22889	1.19619	1.25094	1.21032	1.27534	1.17109	1.19167	1.21033	1.06359	1.2381	1.26776	1.2716	1.21276	0.0120571				8.97939	1.24987	1.33695	1.17926	1.16785	1.14889	1.18743	1.13565	1.19117	1.30504	1.26157	1.23419	1.24968	1.19655	1.27627	1.14011	1.22471	1.08514	1.21002	0.0160043
	9.11383	1.26521	1.11086	1.2873	1.12931	1.22232	1.18036	1.20142	1.22831	1.22856	1.197	1.22628	1.19274	1.24975	1.20548	1.27804	1.17271	1.19949	1.20968	1.0616	1.23915	1.26023	1.2681	1.20972	0.0118048				9.47939	1.25583	1.33983	1.18426	1.17833	1.16306	1.19491	1.14362	1.19018	1.31262	1.26089	1.22827	1.25501	1.19466	1.28259	1.14202	1.22621	1.08619	1.21403	0.0159011
	9.61383	1.26283	1.10762	1.28949	1.13415	1.21972	1.17692	1.19839	1.22917	1.23189	1.22075	1.22441	1.19187	1.24884	1.20705	1.26398	1.18033	1.18631	1.20126	1.05907	1.23679	1.26123	1.26324	1.20888	0.0116816				9.97939	1.25759	1.33704	1.18852	1.18261	1.17111	1.20044	1.14546	1.19288	1.31464	1.27303	1.22379	1.24468	1.18784	1.27588	1.13952	1.22478	1.08638	1.21448	0.0156891
	10.1138	1.27087	1.10573	1.27953	1.1275	1.20932	1.17705	1.19695	1.22064	1.22246	1.21979	1.22467	1.18917	1.24625	1.20565	1.26653	1.17704	1.2009	1.20005	1.06045	1.23601	1.25946	1.2605	1.20711	0.0115975				10.4794	1.24675	1.33046	1.1923	1.19168	1.18277	1.20777	1.14841	1.19518	1.31897	1.27328	1.22273	1.25415	1.18463	1.28512	1.14198	1.22317	1.0831	1.21661	0.0155426
	10.6138	1.26167	1.10833	1.28284	1.12826	1.21234	1.1738	1.19908	1.22917	1.21735	1.21241	1.22175	1.18562	1.243	1.19931	1.26445	1.18002	1.18338	1.19499	1.05775	1.22781	1.25667	1.26024	1.20456	0.0115034				10.9794	1.2538	1.34462	1.19279	1.19898	1.18984	1.20963	1.16655	1.19468	1.32211	1.2868	1.23115	1.25471	1.19435	1.28588	1.14459	1.22523	1.0832	1.22229	0.0158027
	11.1138	1.26956	1.10755	1.27146	1.1172	1.20231	1.17376	1.19501	1.22358	1.21312	1.22171	1.21696	1.18612	1.23948	1.20067	1.27642	1.19499	1.19537	1.20366	1.05201	1.2368	1.25691	1.25846	1.20514	0.0118188				11.4794	1.25524	1.34396	1.19518	1.19733	1.19527	1.21394	1.17997	1.19621	1.32448	1.267	1.22808	1.24025	1.1844	1.28615	1.1445	1.22093	1.08557	1.22109	0.0152853
	11.6138	1.25651	1.10112	1.27187	1.12545	1.19834	1.17269	1.19144	1.21789	1.20988	1.24038	1.21775	1.18116	1.24062	1.20161	1.26029	1.18233	1.18566	1.18888	1.05355	1.22591	1.24492	1.24722	1.2007	0.0113501				11.9794	1.25202	1.34073	1.20028	1.20818	1.20451	1.21752	1.1593	1.19604	1.32423	1.28478	1.23103	1.24474	1.19503	1.2918	1.14454	1.22381	1.08353	1.22365	0.0156141
	12.1138	1.25063	1.10322	1.26401	1.12226	1.20042	1.16955	1.1884	1.21709	1.20976	1.2089	1.21156	1.17876	1.23373	1.19375	1.26395	1.18791	1.19267	1.19037	1.04681	1.22348	1.24712	1.25281	1.19805	0.0112708				12.4794	1.25156	1.34195	1.19898	1.21058	1.20787	1.22026	1.15905	1.195	1.32248	1.28798	1.24313	1.26581	1.20933	1.29308	1.14358	1.22606	1.08451	1.22713	0.0157495
	12.6138	1.2484	1.08874	1.25603	1.11329	1.19172	1.16778	1.18642	1.21236	1.19831	1.21333	1.20691	1.17879	1.23453	1.19616	1.25383	1.1936	1.18679	1.1832	1.05401	1.21956	1.24034	1.24712	1.19415	0.0110971				12.9794	1.25224	1.34206	1.20229	1.21617	1.21319	1.22218	1.14958	1.19271	1.32385	1.29143	1.23028	1.26095	1.19578	1.29464	1.14592	1.22757	1.08339	1.22613	0.0159752
	13.1138	1.23738	1.09328	1.24542	1.10984	1.18501	1.16559	1.1831	1.20579	1.19396	1.21437	1.20573	1.17676	1.23289	1.19537	1.24073	1.18455	1.19259	1.18122	1.04149	1.21318	1.23637	1.24222	1.18986	0.010918				13.4794	1.24906	1.34783	1.20832	1.21465	1.21657	1.22337	1.16353	1.19089	1.32251	1.25384	1.22848	1.2504	1.19317	1.28746	1.14171	1.22731	1.08286	1.22365	0.0153505
	13.6138	1.24856	1.09541	1.25258	1.11655	1.18409	1.16445	1.18208	1.21123	1.19484	1.20913	1.19976	1.17345	1.227	1.18601	1.24144	1.19548	1.17093	1.16833	1.04039	1.20977	1.23434	1.23753	1.18833	0.0109583				13.9794	1.25183	1.34344	1.20754	1.21838	1.2232	1.22283	1.1676	1.1911	1.32302	1.25903	1.22482	1.26105	1.1979	1.28861	1.14863	1.22654	1.08357	1.22583	0.0151241
	14.1138	1.24678	1.09275	1.24411	1.11229	1.18658	1.16536	1.18193	1.20617	1.19294	1.21376	1.19847	1.17146	1.22325	1.18967	1.23681	1.18604	1.18193	1.16686	1.03999	1.2046	1.22965	1.23408	1.18661	0.0107586				14.4794	1.24814	1.34469	1.20287	1.21882	1.2233	1.22639	1.16591	1.19195	1.32256	1.25978	1.2318	1.26202	1.21517	1.28408	1.14734	1.22627	1.08403	1.22677	0.0150441
	14.6138	1.23221	1.08626	1.2453	1.12016	1.18214	1.16371	1.18189	1.20133	1.18884	1.22583	1.19481	1.16863	1.2229	1.18444	1.23029	1.19184	1.17469	1.1663	1.03918	1.20719	1.22911	1.23096	1.18491	0.0106508				14.9794	1.2527	1.34123	1.20559	1.22161	1.22472	1.22635	1.16597	1.19204	1.32345	1.27319	1.24001	1.26593	1.21418	1.2887	1.14618	1.22765	1.0838	1.22902	0.0152443
	15.1138	1.23371	1.08976	1.2388	1.10546	1.17756	1.15929	1.17521	1.1954	1.18195	1.21345	1.193	1.16774	1.22026	1.18567	1.23538	1.19192	1.1732	1.16096	1.03861	1.19879	1.22207	1.22966	1.18127	0.0106084				15.4794	1.24857	1.34084	1.20234	1.21733	1.22607	1.22574	1.17142	1.19682	1.32526	1.2736	1.22791	1.25844	1.19868	1.28915	1.14567	1.22863	1.08513	1.22715	0.0151407
	15.6138	1.23713	1.08147	1.23813	1.1027	1.17384	1.15991	1.17512	1.19072	1.17972	1.19725	1.18798	1.16529	1.21753	1.1809	1.22459	1.18696	1.17854	1.1595	1.03416	1.20009	1.21784	1.22461	1.17791	0.010645				15.9794	1.25129	1.34208	1.20748	1.22129	1.22931	1.22779	1.19797	1.19239	1.32489	1.27246	1.2338	1.25931	1.20824	1.29465	1.15154	1.22768	1.08355	1.23092	0.0148487
	16.1138	1.22073	1.08254	1.23904	1.10262	1.17439	1.15966	1.17325	1.19393	1.17618	1.20523	1.18687	1.16199	1.21385	1.18029	1.22131	1.17723	1.16013	1.14683	1.03015	1.19226	1.21379	1.21711	1.17406	0.0105109				16.4794	1.25269	1.34185	1.20655	1.22185	1.22781	1.22794	1.18767	1.19282	1.32366	1.27747	1.23768	1.26623	1.21734	1.29749	1.15187	1.23181	1.08645	1.2323	0.0149216
	16.6138	1.23448	1.08239	1.23628	1.11506	1.16962	1.15419	1.17279	1.19227	1.1748	1.20652	1.1847	1.16176	1.21146	1.18204	1.22798	1.17438	1.16684	1.14645	1.02857	1.18965	1.2094	1.21882	1.17457	0.0105392				16.9794	1.24311	1.33994	1.2067	1.21939	1.22921	1.22631	1.18079	1.19208	1.3242	1.2676	1.22398	1.25766	1.20726	1.2746	1.14419	1.22799	1.08373	1.2264	0.0147186
	17.1138	1.22509	1.08125	1.23052	1.10629	1.17421	1.1542	1.1691	1.18917	1.16958	1.20865	1.18178	1.15842	1.20717	1.18228	1.20462	1.17609	1.1534	1.14276	1.02268	1.19078	1.20993	1.2146	1.17057	0.0104584				17.4794	1.24619	1.33756	1.2044	1.2206	1.22761	1.22504	1.18087	1.191	1.32207	1.25953	1.22546	1.25477	1.20737	1.27616	1.14727	1.22514	1.08825	1.22584	0.0143271
	17.6138	1.21839	1.07751	1.22576	1.10276	1.16307	1.15392	1.17032	1.18505	1.16641	1.18889	1.1791	1.15722	1.20384	1.17618	1.22039	1.18526	1.15723	1.13745	1.02427	1.18767	1.20365	1.21303	1.16806	0.0103303				17.9794	1.24517	1.33741	1.20109	1.21589	1.23304	1.22593	1.18629	1.19056	1.32347	1.26125	1.22072	1.24007	1.19215	1.27411	1.14822	1.22769	1.08853	1.22421	0.0143112
	18.1138	1.22805	1.07298	1.22869	1.10598	1.16755	1.1503	1.16734	1.18793	1.16228	1.19118	1.17927	1.15684	1.2016	1.17684	1.18652	1.17205	1.13525	1.12917	1.01348	1.17742	1.19709	1.20368	1.16325	0.0105513				18.4794	1.24756	1.3368	1.20369	1.21927	1.22934	1.22621	1.18082	1.18934	1.323	1.27784	1.23411	1.24854	1.21735	1.27984	1.1465	1.22915	1.08615	1.22797	0.0146214
	18.6138	1.2201	1.07334	1.21066	1.10711	1.16479	1.14989	1.16399	1.17965	1.16045	1.19219	1.17671	1.15469	1.19952	1.17424	1.20579	1.18004	1.15786	1.13061	1.02616	1.1831	1.19889	1.20659	1.16438	0.00989063				18.9794	1.24248	1.33629	1.19844	1.21534	1.23205	1.22465	1.19343	1.18927	1.32165	1.27414	1.23389	1.25857	1.20489	1.28595	1.14591	1.22622	1.09141	1.22792	0.0144575
	19.1138	1.21197	1.07465	1.21256	1.09762	1.1647	1.14877	1.16177	1.17842	1.1604	1.19545	1.17033	1.14989	1.19536	1.16847	1.19737	1.1683	1.14698	1.12858	1.01929	1.17683	1.19346	1.20273	1.16018	0.00993132				19.4794	1.24246	1.33287	1.19764	1.22433	1.22777	1.22619	1.19403	1.1873	1.32026	1.25668	1.22906	1.23606	1.19717	1.26897	1.14419	1.22869	1.08818	1.22364	0.01399
	19.6138	1.20198	1.06992	1.20933	1.09103	1.15715	1.14858	1.16027	1.17485	1.15684	1.20474	1.16864	1.14866	1.19431	1.16699	1.18805	1.15622	1.1286	1.11052	1.00726	1.17181	1.18857	1.19536	1.15453	0.0104009				19.9794	1.2372	1.3321	1.20078	1.21666	1.23265	1.22327	1.16626	1.18948	1.31962	1.25814	1.22387	1.23938	1.21549	1.27326	1.14616	1.22861	1.09111	1.22318	0.0140675
	20.1138	1.20907	1.07207	1.20804	1.09407	1.15764	1.14372	1.15785	1.17437	1.15202	1.19175	1.16985	1.14795	1.18924	1.16456	1.20826	1.18022	1.14132	1.12914	1.01633	1.18146	1.18766	1.19775	1.15792	0.0100541				20.4794	1.24217	1.33432	1.19528	1.21743	1.23106	1.22329	1.18575	1.18896	1.32095	1.26223	1.22789	1.23865	1.21013	1.27794	1.14605	1.22626	1.09334	1.22481	0.0140178
	20.6138	1.21116	1.07021	1.20867	1.10502	1.14838	1.14304	1.15546	1.17233	1.14811	1.19202	1.16428	1.14469	1.18577	1.16183	1.2095	1.17454	1.14774	1.1258	1.01234	1.17953	1.18623	1.19488	1.15643	0.0100372				20.9794	1.23309	1.32959	1.19551	1.21637	1.22931	1.22395	1.18681	1.18702	1.31804	1.26009	1.22576	1.24198	1.20302	1.27525	1.14872	1.2296	1.09503	1.22348	0.0136587
	21.1138	1.19469	1.07056	1.2036	1.09729	1.14842	1.14075	1.15348	1.17066	1.14543	1.18335	1.15985	1.14449	1.18583	1.16393	1.19488	1.16456	1.12995	1.11544	1.00827	1.17221	1.18092	1.19074	1.15088	0.00978413				21.4794	1.23897	1.33394	1.18897	1.22183	1.22962	1.22192	1.15743	1.18849	1.31383	1.23937	1.22221	1.22078	1.20203	1.27171	1.14942	1.22752	1.09174	1.21881	0.0139534
	21.6138	1.20311	1.06998	1.19752	1.09159	1.14398	1.13892	1.15054	1.16399	1.14369	1.18577	1.15913	1.13927	1.17989	1.16114	1.19414	1.16791	1.13505	1.10784	1.00767	1.17059	1.17652	1.19217	1.14911	0.00989105				21.9794	1.23713	1.33216	1.18803	1.2183	1.2303	1.22489	1.17668	1.1874	1.31654	1.24232	1.2154	1.23181	1.19962	1.25804	1.14639	1.22334	1.09408	1.21897	0.0135683
	22.1138	1.19665	1.06712	1.19518	1.0952	1.14878	1.13869	1.15015	1.16287	1.14421	1.17826	1.15584	1.14085	1.17937	1.16026	1.19533	1.17022	1.13931	1.11238	1.01683	1.17334	1.17661	1.18835	1.14935	0.00939125				22.4794	1.23474	1.33269	1.18861	1.21646	1.22879	1.2231	1.16755	1.18609	1.31541	1.2383	1.21701	1.23347	1.20347	1.26703	1.14106	1.22345	1.09499	1.21837	0.0138056
	22.6138	1.19143	1.06497	1.19383	1.10183	1.14136	1.13672	1.14814	1.16249	1.14103	1.19317	1.1547	1.13821	1.18153	1.15269	1.19933	1.16835	1.12417	1.11393	1.00531	1.16985	1.17332	1.1855	1.14736	0.00980586				22.9794	1.23338	1.3244	1.19308	1.21633	1.23442	1.22318	1.17181	1.1835	1.31545	1.23356	1.2153	1.22514	1.18766	1.25593	1.14193	1.22168	1.09568	1.21603	0.0133746
	23.1138	1.20383	1.06516	1.1917	1.09007	1.1377	1.13587	1.14455	1.1575	1.13548	1.1871	1.15245	1.13708	1.17424	1.15515	1.18625	1.1674	1.12657	1.11113	1.00827	1.16248	1.17013	1.18267	1.14467	0.00964796				23.4794	1.23403	1.3308	1.19066	1.21372	1.23218	1.21876	1.16354	1.18532	1.31422	1.21346	1.21694	1.21746	1.20341	1.26147	1.14038	1.22154	1.09329	1.21478	0.0136631
	23.6138	1.19352	1.07491	1.19402	1.09119	1.14219	1.1356	1.14347	1.15758	1.13905	1.18009	1.14461	1.13556	1.17151	1.15046	1.17479	1.14718	1.12033	1.10774	1.00135	1.15931	1.16593	1.17601	1.1412	0.00927248				23.9794	1.23227	1.32822	1.18812	1.21584	1.23153	1.22027	1.16899	1.18242	1.31478	1.21351	1.21025	1.22564	1.19629	1.26168	1.14176	1.22303	1.09725	1.21481	0.0134538
	24.1138	1.191	1.06554	1.18785	1.08892	1.13792	1.13503	1.14219	1.15873	1.13272	1.1893	1.14493	1.13337	1.16558	1.14948	1.1918	1.1522	1.11074	1.10309	1.0019	1.15727	1.16456	1.17754	1.14008	0.0096648				24.4794	1.22958	1.32745	1.18824	1.21255	1.22957	1.21879	1.17188	1.18327	1.31167	1.21554	1.2201	1.21882	1.19658	1.26557	1.14689	1.22255	1.09627	1.21502	0.0132492
	24.6138	1.20614	1.07198	1.18441	1.09161	1.1386	1.13404	1.14101	1.15822	1.13096	1.21294	1.14642	1.13343	1.16813	1.15541	1.18611	1.16092	1.11967	1.10312	1.00341	1.16268	1.16339	1.17447	1.14305	0.00989567				24.9794	1.22593	1.32714	1.18321	1.21119	1.2326	1.22022	1.16392	1.18141	1.30786	1.20984	1.20899	1.21941	1.18933	1.26038	1.1371	1.2206	1.09596	1.21148	0.01346
	25.1138	1.19435	1.06652	1.18213	1.08093	1.1425	1.13199	1.13798	1.14742	1.12593	1.18459	1.14096	1.13128	1.16433	1.1469	1.19953	1.17379	1.11516	1.10052	1.00484	1.15796	1.1603	1.17619	1.13937	0.0097385				25.4794	1.22723	1.32458	1.18365	1.21232	1.23031	1.21877	1.17849	1.18107	1.31002	1.20092	1.20699	1.20564	1.1834	1.26153	1.14058	1.21889	1.09798	1.21073	0.0131954
	25.6138	1.19623	1.07007	1.17567	1.09212	1.14576	1.12982	1.13729	1.15189	1.12835	1.20374	1.14049	1.13165	1.16323	1.15322	1.17377	1.15396	1.10688	1.0892	1.00001	1.15347	1.15643	1.17079	1.13746	0.00961962				25.9794	1.22531	1.32291	1.17989	1.21053	1.23041	1.21803	1.16648	1.17944	1.30745	1.2123	1.20532	1.23007	1.18377	1.26284	1.13821	1.21997	1.09901	1.21129	0.0133051
	26.1138	1.18048	1.06388	1.17207	1.08518	1.13619	1.12895	1.13321	1.14249	1.12474	1.20846	1.14151	1.13037	1.1633	1.14968	1.17001	1.1523	1.10924	1.10191	0.996569	1.15409	1.15434	1.16906	1.13491	0.00953538				26.4794	1.22811	1.32572	1.17889	1.20994	1.22978	1.21691	1.16629	1.18092	1.31042	1.19796	1.2035	1.20984	1.17502	1.24956	1.1411	1.21887	1.09937	1.20836	0.013279
	26.6138	1.17352	1.06294	1.16899	1.08159	1.13478	1.1277	1.13348	1.14263	1.12561	1.185	1.13448	1.12806	1.15357	1.13781	1.18017	1.15421	1.11006	1.08707	0.997489	1.15608	1.14926	1.17071	1.1316	0.00926919				26.9794	1.22513	1.3249	1.17788	1.20939	1.22572	1.21751	1.16541	1.18109	1.3056	1.19847	1.19754	1.21511	1.16805	1.25638	1.14039	1.22413	1.10046	1.20783	0.0132729
	27.1138	1.18385	1.06667	1.16514	1.08168	1.13517	1.12549	1.13154	1.14041	1.12281	1.20761	1.13208	1.12769	1.15796	1.14603	1.18973	1.15551	1.11338	1.08818	0.998425	1.15179	1.15196	1.16342	1.13348	0.00966149				27.4794	1.22757	1.31674	1.17582	1.20518	1.22996	1.21446	1.15538	1.18073	1.30636	1.18776	1.19256	1.19032	1.1663	1.24876	1.1362	1.21373	1.09854	1.20273	0.0132868
	27.6138	1.19625	1.06814	1.17109	1.0922	1.14174	1.12458	1.12934	1.14768	1.12682	1.19896	1.12925	1.12711	1.15499	1.14065	1.16968	1.14485	1.10794	1.08753	0.993367	1.15043	1.14704	1.16553	1.13251	0.00952436				27.9794	1.21992	1.32227	1.17453	1.20323	1.22859	1.21484	1.17675	1.17788	1.30625	1.1952	1.18991	1.19003	1.15786	1.24562	1.13526	1.21341	1.09642	1.20282	0.0133405
	28.1138	1.18532	1.0685	1.16425	1.08371	1.13075	1.12354	1.1289	1.14099	1.11883	1.21258	1.12931	1.12447	1.15252	1.14284	1.1739	1.15989	1.10846	1.08479	0.991799	1.14631	1.14678	1.16018	1.13085	0.00974122				28.4794	1.22228	1.31521	1.1756	1.20028	1.22644	1.2146	1.14819	1.17747	1.30414	1.18788	1.19054	1.20823	1.16898	1.24337	1.13673	1.21367	1.09574	1.20173	0.0132111
	28.6138	1.18889	1.07425	1.17101	1.0862	1.12647	1.12348	1.12766	1.13907	1.12225	1.19438	1.1266	1.12404	1.14871	1.13739	1.17317	1.14096	1.10643	1.08344	0.994704	1.1409	1.13988	1.15901	1.12859	0.00918826				28.9794	1.21387	1.32188	1.17239	1.19724	1.22632	1.21411	1.16732	1.17434	1.30355	1.17959	1.18489	1.20798	1.1587	1.24571	1.13331	1.21008	1.09774	1.20053	0.0133757
	29.1138	1.18102	1.06439	1.16229	1.08814	1.12558	1.11926	1.12146	1.14165	1.11853	1.19823	1.12606	1.12143	1.1485	1.13835	1.17202	1.15188	1.09566	1.08185	0.991704	1.14469	1.13927	1.16005	1.12691	0.00944283				29.4794	1.2115	1.31725	1.16867	1.19776	1.225	1.21474	1.15109	1.17616	1.30093	1.18293	1.19325	1.19675	1.16351	1.24484	1.13856	1.20971	1.09808	1.19945	0.0131169
	29.6138	1.16348	1.06367	1.15213	1.0784	1.1229	1.11809	1.11855	1.13422	1.11633	1.21258	1.12277	1.1192	1.14701	1.13423	1.16827	1.14218	1.09272	1.07144	0.994562	1.14253	1.13625	1.15444	1.123	0.00941894				29.9794	1.21632	1.31981	1.1671	1.19719	1.22294	1.21277	1.16036	1.17557	1.29807	1.1678	1.18176	1.20127	1.16135	1.24148	1.13425	1.20749	1.09453	1.19765	0.0133092
	30.1138	1.17621	1.0648	1.15719	1.08604	1.12254	1.11577	1.11841	1.1334	1.11221	1.20737	1.11853	1.11922	1.14576	1.14059	1.1639	1.14523	1.09231	1.07112	0.987738	1.14169	1.13662	1.15525	1.12327	0.00961397				30.4794	1.21288	1.32532	1.17144	1.20176	1.22417	1.21143	1.14177	1.17378	1.29724	1.16803	1.17896	1.19381	1.15074	1.23847	1.13177	1.2091	1.09604	1.19569	0.0137704
	30.6138	1.15609	1.06466	1.15017	1.0733	1.11168	1.11779	1.11704	1.13455	1.11429	1.20379	1.11777	1.11899	1.14323	1.13216	1.16819	1.14619	1.10575	1.07379	0.988653	1.14196	1.13512	1.15504	1.12137	0.00930404				30.9794	1.21672	1.3167	1.16476	1.19308	1.22086	1.21167	1.14035	1.17415	1.29757	1.17801	1.17416	1.19584	1.13858	1.22636	1.12908	1.20422	1.09904	1.19301	0.0134973
	31.1138	1.17418	1.06798	1.15033	1.08761	1.12161	1.11688	1.11442	1.13303	1.11113	1.19398	1.11526	1.11676	1.13809	1.13412	1.16605	1.13476	1.08831	1.06736	0.98573	1.13961	1.13157	1.1511	1.11999	0.0092537				31.4794	1.20856	1.31672	1.1663	1.19525	1.2215	1.20931	1.14549	1.17137	1.29595	1.1645	1.17939	1.20033	1.15419	1.23785	1.12552	1.20276	1.09673	1.19363	0.0134421
	31.6138	1.18457	1.06801	1.14998	1.08462	1.11336	1.11621	1.11378	1.13405	1.11003	1.20231	1.11142	1.11514	1.13957	1.1326	1.15833	1.14269	1.10368	1.07359	0.992582	1.13794	1.13061	1.1481	1.12105	0.00914872				31.9794	1.21027	1.31686	1.16347	1.19412	1.22141	1.20884	1.14756	1.17257	1.29588	1.14613	1.17074	1.18756	1.14462	1.22959	1.12896	1.20238	1.09308	1.19024	0.013704
	32.1138	1.16553	1.06212	1.14484	1.08251	1.11556	1.11425	1.11267	1.13561	1.1072	1.1861	1.11031	1.11242	1.13606	1.13281	1.15471	1.13387	1.09201	1.06113	0.985689	1.1359	1.12479	1.14813	1.1161	0.00898783				32.4794	1.20726	1.30855	1.16162	1.18609	1.21847	1.20748	1.16365	1.17483	1.2949	1.14829	1.16841	1.18735	1.14514	1.22632	1.12395	1.20401	1.09309	1.18938	0.0132436
	32.6138	1.16393	1.06408	1.14227	1.08193	1.11241	1.11075	1.10936	1.12624	1.11143	1.19373	1.10983	1.11184	1.13453	1.13204	1.15528	1.13396	1.0972	1.06384	0.989365	1.13628	1.12624	1.14647	1.11605	0.00884841				32.9794	1.20504	1.30716	1.16095	1.187	1.21584	1.20553	1.14828	1.17151	1.29338	1.1606	1.16788	1.19025	1.14782	1.22601	1.12705	1.19901	1.0942	1.18868	0.0130193
	33.1138	1.1522	1.06207	1.13302	1.07943	1.10983	1.10888	1.10909	1.12628	1.1065	1.18705	1.10634	1.1091	1.13158	1.12762	1.16098	1.13731	1.08824	1.06354	0.984337	1.13141	1.12588	1.14711	1.11308	0.00885127				33.4794	1.20875	1.31042	1.16315	1.1912	1.21471	1.2049	1.14392	1.16948	1.28942	1.1564	1.15584	1.18353	1.13924	1.21642	1.12847	1.19861	1.09171	1.18624	0.0132466
	33.6138	1.16443	1.06103	1.14276	1.07961	1.10699	1.10854	1.10718	1.12615	1.10509	1.20755	1.1056	1.10871	1.12737	1.12747	1.15948	1.14088	1.0967	1.06051	0.989668	1.13722	1.12339	1.1446	1.11504	0.00929				33.9794	1.20427	1.30665	1.16034	1.18946	1.21448	1.20538	1.14944	1.16931	1.29037	1.15653	1.15928	1.17349	1.1463	1.21304	1.12341	1.19385	1.09231	1.18517	0.0130112
	34.1138	1.15928	1.06271	1.13416	1.07857	1.109	1.10592	1.10608	1.12507	1.10591	1.19067	1.10102	1.10797	1.12902	1.12758	1.14977	1.14002	1.10246	1.06258	0.986479	1.1298	1.12459	1.14306	1.11281	0.00874703				34.4794	1.19732	1.30518	1.15942	1.18497	1.21432	1.20329	1.14976	1.16984	1.28682	1.15272	1.15415	1.1824	1.14021	1.20366	1.12265	1.19542	1.09079	1.18311	0.0129267
	34.6138	1.15436	1.05499	1.14208	1.07924	1.10498	1.10554	1.10444	1.12556	1.10216	1.18847	1.10246	1.10726	1.12642	1.12423	1.15188	1.15104	1.09398	1.05795	0.98311	1.13057	1.12155	1.14072	1.1115	0.00906897				34.9794	1.1991	1.29946	1.15902	1.18802	1.21124	1.20251	1.14505	1.16989	1.28604	1.14879	1.16031	1.18547	1.14941	1.22089	1.12928	1.19415	1.09059	1.18466	0.0126589
	35.1138	1.14947	1.0577	1.13616	1.07404	1.10545	1.10288	1.1017	1.1188	1.09929	1.19813	1.10099	1.1076	1.12854	1.12612	1.16775	1.15824	1.09428	1.05388	0.990739	1.13147	1.11969	1.14264	1.11207	0.00928961				35.4794	1.19421	1.29619	1.15661	1.18407	1.21302	1.20277	1.14879	1.16929	1.28614	1.14955	1.1569	1.18554	1.14239	1.22104	1.12168	1.19358	1.0911	1.18311	0.0127398
	35.6138	1.15517	1.05971	1.13738	1.07481	1.10368	1.10186	1.10048	1.12228	1.10015	1.18212	1.09605	1.10544	1.12386	1.12215	1.14465	1.1402	1.07999	1.05175	0.983363	1.1227	1.11733	1.13984	1.1075	0.00884822				35.9794	1.19857	1.29724	1.15182	1.17767	1.21036	1.19967	1.14524	1.16694	1.28238	1.13214	1.14667	1.17308	1.14317	1.21258	1.12355	1.18765	1.08815	1.17864	0.0129446
	36.1138	1.14869	1.05703	1.13991	1.08013	1.10312	1.10241	1.10017	1.11896	1.09952	1.1949	1.09593	1.104	1.12244	1.12221	1.15729	1.15566	1.09324	1.05236	0.985128	1.12608	1.11825	1.13996	1.10988	0.00918401				36.4794	1.19904	1.29433	1.15263	1.18549	1.20733	1.20062	1.1392	1.16653	1.28479	1.13852	1.15391	1.18991	1.15751	1.22319	1.122	1.18813	1.0889	1.18189	0.012827
	36.6138	1.16362	1.05157	1.1388	1.07772	1.10323	1.0994	1.09755	1.11908	1.09678	1.19381	1.09401	1.10308	1.12339	1.12449	1.1392	1.14396	1.08502	1.04577	0.985603	1.12503	1.11541	1.14014	1.10758	0.00927138				36.9794	1.19017	1.29131	1.14941	1.18148	1.20663	1.19809	1.14387	1.16398	1.27996	1.15036	1.15582	1.17832	1.14257	1.22329	1.12109	1.19143	1.09006	1.17987	0.012493
	37.1138	1.14589	1.05257	1.13378	1.06272	1.09086	1.09931	1.09639	1.11133	1.09419	1.19716	1.08955	1.09926	1.11904	1.12332	1.13508	1.14083	1.08511	1.04652	0.983823	1.11717	1.11349	1.13582	1.10333	0.00913998				37.4794	1.19153	1.29259	1.14927	1.17935	1.20727	1.19721	1.14715	1.16487	1.28141	1.13342	1.14804	1.18502	1.13657	1.21165	1.12038	1.18665	1.08887	1.17772	0.0127628
	37.6138	1.15437	1.05924	1.13332	1.07022	1.0948	1.09649	1.09441	1.11467	1.09683	1.19044	1.089	1.10102	1.12021	1.12501	1.15189	1.14642	1.09188	1.05274	0.982092	1.12165	1.11507	1.13415	1.10618	0.00910713				37.9794	1.19371	1.28874	1.14762	1.1791	1.20505	1.19652	1.13449	1.16221	1.27779	1.14508	1.14755	1.1887	1.14964	1.2186	1.12362	1.19026	1.08481	1.17844	0.0125695
	38.1138	1.15498	1.05135	1.13764	1.08017	1.10341	1.09854	1.09405	1.11454	1.09045	1.19096	1.08802	1.09869	1.11533	1.1182	1.13964	1.13478	1.07987	1.04912	0.984026	1.1215	1.11455	1.13069	1.10411	0.00894977				38.4794	1.19045	1.28633	1.14577	1.17725	1.20692	1.1965	1.14614	1.1616	1.28014	1.1509	1.14259	1.17915	1.1447	1.21611	1.12008	1.18917	1.08378	1.17751	0.0125335
	38.6138	1.15842	1.05605	1.13499	1.0826	1.09821	1.09775	1.09567	1.11432	1.09308	1.17881	1.08645	1.09762	1.11481	1.1142	1.1418	1.14035	1.07723	1.04778	0.983919	1.12116	1.11359	1.13339	1.10374	0.00876689				38.9794	1.18939	1.28923	1.14808	1.17703	1.20591	1.19709	1.1432	1.16218	1.27419	1.13441	1.14915	1.18662	1.13374	1.20424	1.12226	1.1839	1.08301	1.17551	0.0125395
	39.1138	1.14591	1.06121	1.13291	1.07753	1.09886	1.09305	1.09126	1.11435	1.09124	1.17127	1.0827	1.09605	1.11311	1.11403	1.13359	1.14244	1.08413	1.04632	0.982501	1.11807	1.11156	1.12947	1.10143	0.00839059				39.4794	1.18373	1.28353	1.14257	1.17285	1.20297	1.19292	1.1432	1.16218	1.27419	1.14646	1.1505	1.18766	1.15126	1.20563	1.12239	1.18665	1.08383	1.17603	0.0120207
	39.6138	1.15447	1.05604	1.12949	1.07744	1.10121	1.09343	1.08922	1.11068	1.09436	1.19781	1.08302	1.09601	1.11352	1.12093	1.14716	1.13826	1.08862	1.04186	0.977257	1.11629	1.10826	1.13355	1.10313	0.00937263				39.9794	1.18612	1.27871	1.13795	1.17386	1.20099	1.19247	1.11918	1.15992	1.27726	1.12724	1.13438	1.1743	1.13537	1.20268	1.12085	1.18035	1.07942	1.16947	0.012845
	40.1138	1.148	1.05685	1.12979	1.07179	1.09681	1.09418	1.08984	1.10646	1.09298	1.19627	1.08097	1.09231	1.11152	1.11567	1.14072	1.14562	1.08146	1.04187	0.977232	1.11614	1.10987	1.13045	1.10122	0.00929809				41.1821	1.18168	1.28073	1.14115	1.17563	1.20065	1.19065	1.12558	1.15334	1.27169	1.11636	1.11846	1.16544	1.11341	1.19402	1.0911	1.15686	1.05646	1.16078	0.0141418
	40.6138	1.15195	1.059	1.12022	1.07069	1.09974	1.09293	1.08695	1.11069	1.09144	1.19231	1.08149	1.09203	1.11198	1.11803	1.14792	1.13935	1.08805	1.0446	0.982056	1.11529	1.11142	1.12953	1.10171	0.00902026				42.0313	1.18168	1.28073	1.14115	1.17563	1.20065	1.19065	1.11796	1.15182	1.26907	1.11636	1.11846	1.16544	1.11341	1.19402	1.0911	1.15686	1.05646	1.16008	0.0141466
	41.1138	1.14668	1.05798	1.12663	1.07168	1.09346	1.09166	1.08447	1.10793	1.08729	1.20941	1.07938	1.09309	1.11129	1.11619	1.14178	1.14708	1.07505	1.04291	0.978416	1.11593	1.11197	1.12723	1.1008	0.0096043				42.5243	1.17142	1.27776	1.13721	1.17005	1.19763	1.18527	1.11009	1.14479	1.26774	1.09101	1.09868	1.13697	1.09231	1.15648	1.08198	1.14307	1.04396	1.14744	0.0150736
	41.6138	1.14877	1.05411	1.12377	1.07714	1.09616	1.09019	1.08532	1.10769	1.08273	1.2008	1.07814	1.09156	1.11009	1.11533	1.1422	1.1473	1.07664	1.03516	0.980034	1.11186	1.10794	1.12446	1.09943	0.00944996				43.0243	1.16034	1.26621	1.13137	1.16159	1.19221	1.18094	1.10944	1.14222	1.26247	1.08509	1.09822	1.13081	1.10818	1.15737	1.0732	1.13848	1.04281	1.14359	0.0144855
																													43.5243	1.15651	1.25954	1.12466	1.15769	1.18658	1.17562	1.1017	1.14131	1.26182	1.07661	1.09673	1.12457	1.08915	1.15591	1.06704	1.13676	1.03802	1.13825	0.0147908
																													44.0243	1.14588	1.25059	1.12095	1.15646	1.18407	1.17047	1.11423	1.13842	1.25884	1.05398	1.0911	1.1217	1.09409	1.15298	1.06653	1.13191	1.03442	1.13451	0.0147351
																													44.5243	1.14404	1.24867	1.11594	1.14829	1.18014	1.16818	1.1066	1.13491	1.25584	1.06795	1.08598	1.10472	1.08186	1.13657	1.05627	1.1252	1.03067	1.12893	0.0147631
																													45.0243	1.14195	1.24196	1.11294	1.14988	1.1761	1.16415	1.10234	1.13222	1.25257	1.05644	1.08308	1.10232	1.08381	1.13709	1.05546	1.12666	1.02717	1.12624	0.0147168
																													45.5243	1.13246	1.2421	1.11198	1.1474	1.17335	1.16214	1.08683	1.12569	1.24762	1.06105	1.07992	1.09749	1.0784	1.13952	1.04986	1.11939	1.02537	1.12239	0.0147775
																													46.0243	1.13259	1.22966	1.10779	1.1395	1.17211	1.15786	1.07817	1.12568	1.24177	1.05534	1.08191	1.09456	1.06475	1.12947	1.04596	1.11692	1.02114	1.11736	0.0146074
																													46.5243	1.11957	1.22934	1.10323	1.13744	1.16912	1.15246	1.09133	1.12126	1.23685	1.05089	1.06933	1.09195	1.06984	1.12784	1.04305	1.1159	1.01942	1.11464	0.0144457
																													47.0243	1.11798	1.22366	1.09815	1.13069	1.16548	1.15103	1.0846	1.11866	1.23614	1.04098	1.07285	1.08528	1.07007	1.12524	1.04137	1.10864	1.01568	1.11097	0.0144911
																													47.5243	1.11115	1.21747	1.09548	1.13087	1.16195	1.14814	1.0753	1.11924	1.23548	1.03355	1.06605	1.07186	1.06299	1.11007	1.03524	1.10568	1.01366	1.10554	0.0147749
																													48.0243	1.10145	1.21262	1.09166	1.12214	1.16147	1.14469	1.08467	1.11806	1.2293	1.02431	1.06563	1.07854	1.05565	1.10663	1.03684	1.09992	1.00825	1.10246	0.0146011
																													48.5243	1.09806	1.21129	1.08766	1.11816	1.15617	1.14221	1.06282	1.1104	1.22532	1.0325	1.06193	1.08334	1.06416	1.10414	1.03036	1.10365	1.00906	1.10007	0.0143134
																													49.0243	1.10138	1.20404	1.08343	1.11546	1.15491	1.14013	1.08547	1.10811	1.22505	1.03243	1.06107	1.08307	1.05869	1.10615	1.02981	1.1018	1.00773	1.09993	0.0140159
																													49.5243	1.08759	1.1949	1.08078	1.11239	1.14845	1.13651	1.07106	1.10854	1.22347	1.02692	1.0513	1.05932	1.04072	1.11129	1.02967	1.0952	1.00423	1.09308	0.0143298
																													50.0243	1.09395	1.19301	1.07794	1.1122	1.14757	1.13328	1.05731	1.10446	1.21783	1.01406	1.05124	1.06452	1.03915	1.09388	1.02617	1.09155	1.00008	1.08931	0.0144436
																													50.5243	1.08753	1.18504	1.07199	1.10623	1.14668	1.13189	1.07647	1.10361	1.21726	1.00994	1.04223	1.06478	1.03809	1.08596	1.02468	1.0894	0.997518	1.08702	0.0143313
																													51.0243	1.08712	1.18112	1.07324	1.10363	1.14429	1.12856	1.06817	1.10163	1.21493	1.01703	1.04386	1.05319	1.03314	1.0881	1.02017	1.08491	0.995731	1.08464	0.0141913
																													51.5243	1.08011	1.17788	1.0671	1.10197	1.1415	1.12468	1.06804	1.09829	1.21014	1.01253	1.05145	1.04869	1.03155	1.09027	1.01966	1.08521	0.99345	1.0825	0.0139954
																													52.0243	1.07552	1.17428	1.06514	1.09557	1.13829	1.12152	1.05498	1.0954	1.20876	1.00426	1.03677	1.04875	1.02773	1.07833	1.01741	1.07882	0.989864	1.07714	0.0142402
																													52.5243	1.07535	1.16068	1.06293	1.09395	1.13747	1.12093	1.06761	1.09396	1.20337	1.0024	1.04308	1.03694	1.01978	1.07219	1.01146	1.07858	0.984843	1.07444	0.0140535
																													53.0243	1.07165	1.16215	1.05943	1.09062	1.13331	1.1181	1.04391	1.09379	1.19852	0.99554	1.02927	1.02845	1.02476	1.07871	1.01376	1.07088	0.983732	1.07039	0.0141904
																													53.5243	1.06499	1.16263	1.05671	1.08432	1.13352	1.11614	1.0592	1.08908	1.19787	0.992642	1.03271	1.0189	1.00074	1.06136	1.01006	1.0684	0.981859	1.06654	0.0146028
																													54.0243	1.06016	1.15672	1.05586	1.0843	1.13238	1.11192	1.06329	1.08754	1.19501	0.992603	1.03243	1.02884	1.0136	1.06335	1.00553	1.0691	0.978415	1.06653	0.0141306
																													54.5243	1.05906	1.15218	1.04701	1.0757	1.12627	1.1112	1.05045	1.08521	1.19299	0.982747	1.02692	1.019	1.00562	1.05763	1.00542	1.06664	0.976542	1.06121	0.0143498
																													55.0243	1.05344	1.14786	1.04551	1.07532	1.12793	1.10795	1.0423	1.08311	1.18977	0.990736	1.0251	1.02341	1.0098	1.06279	1.0046	1.06658	0.975084	1.06066	0.0139598
																													55.5243	1.04864	1.14417	1.03973	1.07193	1.12809	1.10619	1.0495	1.08322	1.18587	0.988411	1.02028	1.02077	1.00555	1.05747	1.00278	1.06326	0.970438	1.05802	0.0140224

## Sheet: Figure 2 - Supplement 1C-D
		DMSO addition 10 minutes post-EGF
	Time (min)	Cell 1	Cell 2	Cell 3	Cell 4	Cell 5	Cell 6	Cell 7	AVERAGE	SEM
	-6.049	0.962657	0.973101	0.935735	0.992108	0.984825	0.98914	0.963117	0.971526	0.0074699
	-5.549	0.965648	0.990644	0.953294	0.992722	0.986573	0.989795	0.964908	0.977655	0.00602136
	-5.049	0.967854	0.982704	0.956051	0.99269	0.988958	0.991733	0.972423	0.978916	0.00524745
	-4.54883	0.970463	0.993752	0.962435	0.993536	0.98905	0.991302	0.978623	0.982737	0.00470795
	-4.04883	0.968939	0.983063	0.964914	0.996486	0.990522	0.989361	0.978081	0.981624	0.00440431
	-3.54883	0.988055	0.987449	0.983615	0.997911	0.99596	0.991538	0.985294	0.989975	0.00203356
	-3.04883	0.99253	1.00333	0.993734	0.998649	0.994624	0.997743	0.987195	0.995401	0.00193904
	-2.54883	0.98658	0.996225	0.99385	1.00038	0.996964	0.993454	0.98495	0.993201	0.00211175
	-2.04883	0.993973	0.999329	0.993727	0.99872	0.997566	0.993861	0.984728	0.994558	0.00187268
EGF addition	0	1	1	1	1	1	1	1	1	0
	0.480167	0.987891	0.994382	0.991148	1.00057	0.994513	0.993121	0.999201	0.994403	0.00165946
	0.980167	0.98784	0.998466	1.0061	0.997948	0.995596	0.996603	0.998677	0.997318	0.00203512
	1.48017	0.978059	0.987951	0.993909	0.995683	0.995038	0.996773	1.00186	0.992754	0.00290017
	1.98017	0.991675	0.979282	1.00214	1.00127	0.993693	0.993793	1.00213	0.994853	0.00309411
	2.48017	0.978864	0.978677	1.00084	1.00082	1.00708	0.993424	1.01035	0.995722	0.00481863
	2.98017	1.00414	0.998868	1.02107	1.00829	1.03564	1.00083	1.02527	1.01344	0.00529029
	3.48017	1.00478	1.04244	1.05651	1.01217	1.0907	1.01341	1.0566	1.03952	0.0117966
	3.98017	1.03222	1.09244	1.08054	1.02273	1.15249	1.03791	1.09239	1.07296	0.0172866
	4.48017	1.06282	1.12597	1.06442	1.0406	1.19284	1.0822	1.1447	1.10194	0.0205628
	4.98017	1.1121	1.14543	1.08052	1.07321	1.21624	1.13786	1.18868	1.13629	0.0200584
	5.48017	1.14915	1.14786	1.08103	1.11959	1.22202	1.19095	1.20972	1.16005	0.0191545
	5.98017	1.17411	1.165	1.09173	1.16955	1.22601	1.22811	1.21674	1.18161	0.0182078
	6.48017	1.1784	1.15617	1.09226	1.21319	1.22967	1.24801	1.22897	1.19238	0.0205797
	6.98017	1.19087	1.17001	1.08436	1.24237	1.23131	1.26175	1.23366	1.20205	0.0229113
	7.48017	1.20284	1.16297	1.09384	1.25853	1.22428	1.27138	1.23003	1.20627	0.0230872
	9.32567	1.20284	1.16297	1.09384	1.25853	1.22428	1.27138	1.23003	1.20627	0.0230872
	9.80567	1.19809	1.18796	1.12075	1.26285	1.22671	1.27375	1.23241	1.21465	0.0195675
	10.3057	1.2024	1.18014	1.11399	1.25907	1.22084	1.2702	1.23313	1.2114	0.0200228
	10.8057	1.203	1.17885	1.12264	1.26306	1.2214	1.2704	1.22871	1.21258	0.01924
	11.3057	1.20694	1.17902	1.12461	1.26247	1.21953	1.27654	1.23556	1.21495	0.0195259
	11.8057	1.21496	1.19935	1.1274	1.26844	1.22813	1.27856	1.23217	1.22129	0.0189007
	12.3057	1.20935	1.19	1.12399	1.26635	1.23082	1.27971	1.2414	1.22023	0.0198329
	12.8057	1.22175	1.1997	1.12181	1.27094	1.23019	1.28116	1.24455	1.2243	0.020101
	13.3057	1.22199	1.20281	1.12384	1.26902	1.22834	1.2778	1.24049	1.22347	0.0193305
	13.8057	1.2225	1.18931	1.12051	1.27386	1.22996	1.287	1.2437	1.22383	0.0211546
	14.3057	1.22126	1.18633	1.108	1.27454	1.2303	1.28054	1.24208	1.22044	0.0223131
	14.8057	1.22711	1.18803	1.12037	1.27478	1.23259	1.28688	1.24273	1.22464	0.0212671
	15.3057	1.23567	1.19951	1.11715	1.27656	1.23292	1.28968	1.24822	1.22853	0.0216852
	15.8057	1.23927	1.20155	1.13392	1.27838	1.23357	1.28502	1.24976	1.23164	0.0194435
	16.3057	1.22922	1.20389	1.13008	1.283	1.23718	1.29129	1.25106	1.23225	0.0205241
	16.8057	1.22922	1.19333	1.11841	1.28277	1.23568	1.28799	1.25056	1.22828	0.0220281
	17.3057	1.23644	1.21358	1.1451	1.28336	1.23828	1.29354	1.2523	1.23751	0.0186274
	17.8057	1.22076	1.19744	1.1413	1.28238	1.23589	1.2942	1.24621	1.23117	0.0196199
	18.3057	1.2289	1.20814	1.12169	1.28681	1.23842	1.29479	1.25089	1.23281	0.021869
	18.8057	1.25468	1.22909	1.14679	1.28806	1.24085	1.30026	1.25952	1.24561	0.0189777
	19.3057	1.23957	1.21691	1.1455	1.28964	1.23658	1.2983	1.25385	1.24005	0.0192298
	19.8057	1.23666	1.1904	1.11508	1.28857	1.23933	1.29716	1.24969	1.23099	0.0235163
	20.3057	1.25099	1.19653	1.12601	1.28978	1.23512	1.29461	1.2562	1.23561	0.0221549
	20.8057	1.25126	1.19468	1.14241	1.29203	1.23551	1.29278	1.25662	1.2379	0.0203907
	21.3057	1.25118	1.21013	1.12899	1.29423	1.23438	1.29568	1.25664	1.23875	0.0216468
	21.8057	1.23935	1.19751	1.11426	1.29663	1.23505	1.29026	1.24299	1.23086	0.0232992
	22.3057	1.2505	1.19391	1.11891	1.2928	1.23211	1.29675	1.24958	1.23351	0.0232813
	22.8057	1.24883	1.20666	1.12439	1.29552	1.23489	1.29713	1.24951	1.2367	0.0223294
	23.3057	1.24212	1.20648	1.12069	1.29722	1.23657	1.29482	1.24803	1.23513	0.0226529
	23.8057	1.2532	1.19806	1.11121	1.29786	1.23133	1.29272	1.24955	1.23342	0.0241566
	24.3057	1.24608	1.19961	1.10952	1.30039	1.23214	1.29204	1.24878	1.23265	0.0243048
	24.8057	1.25046	1.20853	1.1105	1.29942	1.23065	1.29244	1.24342	1.23363	0.0238882
	25.3057	1.23708	1.19947	1.12053	1.29884	1.23174	1.29206	1.23878	1.23121	0.0226916
	25.8057	1.24452	1.19319	1.11196	1.30154	1.23228	1.288	1.23458	1.22944	0.0239071
	26.3057	1.24159	1.18928	1.10523	1.30097	1.22824	1.29014	1.22906	1.22636	0.0248439
	26.8057	1.24929	1.195	1.1164	1.29897	1.23088	1.29032	1.23637	1.23103	0.023366
	27.3057	1.23159	1.20672	1.10991	1.30157	1.2244	1.29096	1.236	1.22873	0.0238357
	27.8057	1.23992	1.19448	1.11814	1.30065	1.22366	1.28428	1.24024	1.22877	0.0228581
	28.3057	1.25465	1.19379	1.10124	1.30113	1.21926	1.27905	1.23281	1.22599	0.0248674
	28.8057	1.23331	1.18778	1.09974	1.30362	1.21938	1.27934	1.23139	1.22208	0.0250201
	29.3057	1.24081	1.19904	1.10247	1.30295	1.22226	1.28166	1.23767	1.22669	0.0245788
	29.8057	1.23988	1.18304	1.09362	1.30465	1.21664	1.27534	1.23372	1.22098	0.0258911
	30.3057	1.2512	1.19902	1.09864	1.30091	1.2172	1.27629	1.22541	1.2241	0.0247723
	30.8057	1.24185	1.20377	1.08975	1.30236	1.21938	1.2763	1.22595	1.22276	0.0256537
	31.3057	1.25131	1.21501	1.08793	1.30364	1.21824	1.27134	1.2221	1.22423	0.0258022
	31.8057	1.24941	1.21218	1.07351	1.30566	1.21793	1.26781	1.22358	1.22144	0.0276074
	32.3057	1.24938	1.18439	1.07594	1.30257	1.20989	1.26673	1.22155	1.21578	0.0275449
	32.8057	1.24626	1.19406	1.08879	1.30412	1.21322	1.26863	1.22111	1.21946	0.0258496
	33.3057	1.25052	1.18836	1.08822	1.30287	1.20653	1.26199	1.22334	1.2174	0.0258541
	33.8057	1.25095	1.18635	1.09397	1.30293	1.20529	1.26255	1.22279	1.21783	0.0252854
	34.3057	1.26408	1.18936	1.07352	1.30288	1.20067	1.26147	1.22447	1.21663	0.0281331
	34.8057	1.24515	1.17755	1.06669	1.30345	1.19935	1.2605	1.20888	1.20879	0.028542
	35.3057	1.23502	1.18521	1.07298	1.30676	1.20327	1.25744	1.20967	1.21005	0.0274609
	35.8057	1.24349	1.18245	1.07228	1.30777	1.195	1.25191	1.21369	1.20951	0.0277742
	36.3057	1.25503	1.17724	1.06954	1.30683	1.19481	1.25318	1.20379	1.20863	0.0285884
	36.8057	1.23716	1.16872	1.0624	1.30365	1.19189	1.25577	1.20897	1.20408	0.0289399
	37.3057	1.25247	1.19379	1.09426	1.30951	1.19261	1.26203	1.21194	1.21666	0.0258513
	37.8057	1.24167	1.18654	1.06782	1.30474	1.19085	1.24707	1.20105	1.20568	0.0277893
	38.3057	1.23396	1.17073	1.06498	1.30613	1.18397	1.24536	1.20385	1.20128	0.028377
	38.8057	1.23916	1.15605	1.05859	1.30646	1.18663	1.24369	1.19904	1.19852	0.029629
	39.3057	1.25181	1.14303	1.05677	1.30599	1.18146	1.2425	1.1993	1.19727	0.0307741
	39.8057	1.24285	1.15258	1.06368	1.30626	1.18253	1.23717	1.1981	1.1976	0.0291175
	40.3057	1.25114	1.16785	1.07664	1.30583	1.18374	1.23787	1.20175	1.20355	0.0274648
	40.8057	1.26841	1.16294	1.06093	1.3069	1.18734	1.24147	1.195	1.20328	0.0303354
	41.3057	1.25654	1.14677	1.06003	1.30632	1.17528	1.23645	1.19919	1.19723	0.0303986
	41.8057	1.2553	1.17378	1.08173	1.3064	1.17767	1.23129	1.19833	1.2035	0.0269252
	42.3057	1.26412	1.16759	1.06924	1.30833	1.18081	1.23308	1.19995	1.2033	0.0290251
	42.8057	1.26551	1.15478	1.05743	1.30941	1.17636	1.22815	1.18985	1.19736	0.0308752
	43.3057	1.25436	1.1455	1.05009	1.30981	1.17616	1.2241	1.19513	1.19359	0.0313742
	43.8057	1.27853	1.16926	1.08058	1.31103	1.17272	1.22923	1.1967	1.20543	0.0289098
												AVERAGE	SEM
	MAX	1.27853	1.22909	1.14679	1.31103	1.24085	1.30026	1.25952	1.251	0.01809		1.243	0.008414	pmEKAR4 only
	SAM40	0.871908	0.666035	0.433854	0.984691	0.757853	0.789866	0.763312	0.7525	0.06523		0.7672	0.01444
		Unpaired t test - MAX				Unpaired t test - SAM40
		P value	0.7546			P value	0.7695
		P value summary	ns			P value summary	ns
		Significantly different (P < 0.05)?	No			Significantly different (P < 0.05)?	No
		One- or two-tailed P value?	Two-tailed			One- or two-tailed P value?	Two-tailed
		t, df	t=0.3137 df=77			t, df	t=0.2941 df=76

## Sheet: Figure 2 - Supplement 2
	U0126 addition at 10 minutes post-EGF													U0126 addition 40 minutes post-EGF
	Time (min)	AVERAGE	SEM											Time (min)	AVERAGE	SEM
	-5.50128	0.986723	0.00350202											-5.90437	0.998298	0.00426068
	-5.00128	0.988916	0.00255365											-5.40437	1.00283	0.00263751
	-4.50128	0.990266	0.00283904											-4.90437	0.992851	0.00255436
	-4.00128	0.991223	0.00229172											-4.40437	0.998944	0.00337198
	-3.50128	0.994767	0.00183311											-3.90437	0.992233	0.00199312
	-3.00128	0.994411	0.00254532											-3.40437	0.990838	0.00255639
	-2.50128	0.999577	0.00152754											-2.90437	0.992157	0.00214041
	-2.00128	0.997301	0.00258126											-2.40437	0.98773	0.00198414
	-1.50128	1.00154	0.0012497											-1.90437	0.995709	0.00197275
EGF addition	0	1	0	EGF Addition										-1.42567	0.995239	0.00164711
	0.48	0.999201	0.000943068											-0.966	1.00364	0.0018468
	0.98	0.998793	0.00107234										EGF addition	0	1	0
	1.48	0.998226	0.00107753											0.4759	0.987326	0.00161536
	1.98	1.00046	0.00101231											0.9759	0.99153	0.00205298
	2.48	0.999734	0.00277686											1.4759	0.992284	0.00220629
	2.98	1.0159	0.00346688											1.9759	0.997665	0.0021391
	3.48	1.035	0.0068142											2.4759	0.996484	0.00439007
	3.98	1.05306	0.0103009											2.9759	1.00974	0.00761579
	4.48	1.08103	0.0131201											3.4759	1.0367	0.0105864
	4.98	1.09869	0.0145833											3.9759	1.05103	0.0122348
	5.48	1.12151	0.0153153											4.4759	1.07142	0.013587
	5.98	1.13288	0.0156912											4.9759	1.09828	0.0144796
	6.64667	1.15345	0.0159451											5.4759	1.1091	0.0143053
	7.14667	1.15839	0.0157915											5.9759	1.12423	0.014238
	7.48	1.146	0.0164028											6.4759	1.13869	0.0140816
	7.98	1.15677	0.0169196											6.9759	1.1524	0.0137986
	8.48	1.16097	0.0160474											7.4759	1.15219	0.0132585
	8.98	1.16698	0.0157688											7.9759	1.15544	0.0130406
	9.51317	1.17201	0.0158291											8.4759	1.16727	0.0129763
	10.0247	1.19007	0.0126374											8.9759	1.16277	0.0126426
	10.5247	1.1903	0.0126946											9.4759	1.16831	0.0123709
	11.0247	1.19467	0.012643											9.9759	1.17482	0.0125545
	11.5247	1.19852	0.0125555											10.4759	1.1786	0.0122775
	12.0472	1.19744	0.0178251											10.9759	1.18376	0.0121439
	12.5472	1.19616	0.0177494											11.4759	1.18897	0.012283
	13.0183	1.19365	0.0118799											11.9759	1.17721	0.0115905
	13.5275	1.19632	0.0127153											12.4759	1.19072	0.011993
	14.0275	1.19784	0.0129387											12.9759	1.18351	0.0115373
	14.5275	1.19959	0.0124312											13.4759	1.19674	0.0119314
	15.0275	1.19535	0.0129175											13.9759	1.18305	0.0120715
	15.4996	1.18319	0.0123631											14.4759	1.1888	0.0115311
	15.9931	1.18269	0.0123497											14.9759	1.19437	0.011374
	16.4931	1.1806	0.0124608											15.4759	1.1892	0.0112186
	16.9931	1.18124	0.0120554											15.9759	1.18611	0.0116238
	17.4931	1.17886	0.0120047											16.4759	1.19523	0.0118544
	17.9931	1.17236	0.0133852											16.9759	1.18691	0.0114549
	18.4931	1.1783	0.0120384											17.4759	1.18601	0.0112254
	18.9931	1.16986	0.0128878											17.9759	1.18763	0.0110567
	19.4931	1.17319	0.0120756											18.4759	1.20139	0.011443
	19.9931	1.16948	0.0124108											18.9759	1.19334	0.0116633
	20.4931	1.16826	0.012256											19.4759	1.17835	0.0117062
	20.9931	1.16431	0.0126709											19.9759	1.18435	0.0117951
	21.4931	1.16497	0.0122324											20.4759	1.17461	0.0109176
	21.9931	1.15803	0.0129153											20.9759	1.18152	0.010897
	22.4931	1.15566	0.0129204											21.4759	1.17905	0.0117552
	22.9931	1.15859	0.0123047											21.9759	1.17442	0.0109009
	23.4931	1.15101	0.0133052											22.4759	1.17633	0.0112927
	23.9931	1.14822	0.013143											22.9759	1.16895	0.0112808
	24.4931	1.1466	0.0130839											23.4759	1.1864	0.0114587
	24.9931	1.15008	0.0123578											23.9759	1.17298	0.0105439
	25.4931	1.14183	0.0132171											24.4759	1.17556	0.0116676
	25.9931	1.14107	0.0128996											24.9759	1.18136	0.0111421
	26.4931	1.14428	0.0120619											25.4759	1.17784	0.0108895
	26.9931	1.13654	0.0126498											25.9759	1.16918	0.0105082
	27.4931	1.13863	0.0120624											26.4759	1.1693	0.0107315
	27.9931	1.13292	0.0128867											26.9759	1.17062	0.0116739
	28.4931	1.13432	0.0122719											27.4759	1.1625	0.0112946
	28.9931	1.12995	0.0125773											27.9759	1.15967	0.0104118
	29.4931	1.12613	0.0130599											28.4759	1.16401	0.0112802
	29.9931	1.12842	0.0120436											28.9759	1.16715	0.0105865
	30.4931	1.12388	0.0122429											29.4759	1.15958	0.0106949
	30.9931	1.12454	0.0122329											29.9759	1.16796	0.0106753
	31.4931	1.12249	0.0121295											30.4759	1.16265	0.0107978
	31.9931	1.11968	0.0123461											30.9759	1.15833	0.0111741
	32.4931	1.12003	0.0123649											31.4759	1.15687	0.0105719
	32.9931	1.1156	0.0123912											31.9759	1.15875	0.0113897
	33.4931	1.11346	0.0127384											32.4759	1.15384	0.0109105
	33.9931	1.11186	0.0127087											32.9759	1.16537	0.0108943
	34.4931	1.109	0.0125802											33.4759	1.15439	0.010902
	34.9931	1.10808	0.0130643											33.9759	1.15385	0.0109336
	35.4931	1.10829	0.0127678											34.4759	1.1538	0.0108088
	35.9931	1.10752	0.0124756											34.9759	1.15565	0.0109372
	36.4931	1.10386	0.0129363											35.4759	1.15555	0.0108744
	36.9931	1.09945	0.0130709											35.9761	1.1498	0.0106951
	37.4931	1.09812	0.0130039											36.4761	1.14073	0.0105344
	37.9931	1.09788	0.0128889											36.9763	1.14625	0.00997326
	38.4931	1.09394	0.0130349											37.5493	1.15769	0.0105508
	38.9931	1.0929	0.0129539											38.0588	1.15183	0.0102227
	39.4931	1.09098	0.0131695											38.5718	1.15209	0.0103674
	39.9931	1.0906	0.0128023											39.0656	1.14673	0.0100905
	40.4931	1.08964	0.0127768											39.5759	1.14463	0.00963987
	40.9931	1.08707	0.0126685											40.0709	1.14289	0.00936216
	41.4931	1.08287	0.0133799											40.5709	1.14493	0.00950556
	41.9931	1.08276	0.0129197											41.2482	1.13977	0.00999942
	42.4931	1.08283	0.0129859											41.7441	1.13852	0.00910842
	42.9931	1.07906	0.0135085											42.2441	1.14141	0.00992757
	43.4931	1.07873	0.0131426											42.7441	1.12285	0.00956862
	43.9931	1.07369	0.0138451											43.2441	1.121	0.00938498
	44.4931	1.07382	0.0136934											43.7441	1.11942	0.00933264
	44.9931	1.07135	0.0135896											44.2441	1.12182	0.00956164
	45.4931	1.07171	0.0135089											44.7441	1.11169	0.00878846
														45.2441	1.13267	0.00948335
														45.7441	1.12532	0.00895302
		0.001234	0.0003716	pmEKAR4 only										46.2441	1.11992	0.00875047
	SLOPE decay	-0.002871	0.0003716	U0126										46.7441	1.12205	0.00898894
		-0.004674	0.0004113	SCH772984										47.2441	1.11291	0.00841874
														47.7441	1.11849	0.00912429
														48.2441	1.09769	0.00872349
														48.7441	1.11397	0.00879508
		1-way ANOVA with Multiple Comparisons												49.2441	1.09779	0.00837949
		# of families			1									49.7441	1.10084	0.00874564
		# of comparisons per family			3									50.2441	1.10257	0.00860426
		Alpha	0.05											50.7441	1.10003	0.00873195
														51.2441	1.09179	0.00823034
		Tukey's multiple comparisons test	Mean Diff.	95.00% CI of diff.	Significant?	Summary	Adjusted P Value							51.7441	1.09911	0.00841117
														52.2441	1.08914	0.0083841
		pmEKAR vs. U0126	0.004105	0.002454 to 0.005755	Yes	****	<0.0001	pmEKAR4 vs U0126						52.7441	1.09814	0.00839252
		pmEKAR vs. SCH772984	0.005908	0.004425 to 0.007391	Yes	****	<0.0001	pmEKAR4 vs SCH772984						53.2441	1.08124	0.0082253
		U0126 vs. SCH772984	0.001803	-0.0001148 to 0.003722	No	ns	0.0701	U0126 vs SCH772984						53.7441	1.08847	0.00831814
														54.2441	1.07937	0.008407
														54.7441	1.08194	0.00899808
		Test details	Mean 1	Mean 2	Mean Diff.	SE of diff.	n1	n2	q	DF				55.2441	1.0836	0.00878473
														55.7441	1.08166	0.00889091
		pmEKAR vs. U0126	0.001234	-0.002871	0.004105	0.0006953	71	21	8.349	117				56.2441	1.07771	0.00812796
		pmEKAR vs. SCH772984	0.001234	-0.004674	0.005908	0.0006246	71	28	13.38	117				56.7441	1.07127	0.00837148
		U0126 vs. SCH772984	-0.002871	-0.004674	0.001803	0.000808	21	28	3.156	117				57.2441	1.06951	0.00836865
														57.7441	1.07496	0.00843049
														58.2441	1.07528	0.00875875
														58.7441	1.07681	0.00848103
														59.2441	1.0728	0.00805422
														59.7441	1.06165	0.00818296
														60.2441	1.07173	0.00856136
														60.7441	1.0509	0.00826345
														61.2441	1.05894	0.00847357
														61.7441	1.0642	0.00818199
														62.2441	1.04933	0.00837539
														62.7441	1.04813	0.00837811
														63.2441	1.04833	0.00784365
														63.7441	1.05725	0.00856756
														64.2441	1.05795	0.00811721
														64.7441	1.04695	0.00770673
															-0.002506	0.0001943	pmEKAR4 only
														SLOPE decay	-0.004356	0.0003068	U0126
															-0.007522	0.0003784	SCH772984
														1-Way ANOVA with Multiple Comparisons
														Number of families			1
														Number of comparisons per family			3
														Alpha	0.05
														Tukey's multiple comparisons test	Mean Diff.	95.00% CI of diff.	Significant?	Summary	Adjusted P Value
														pmEKAR vs. U0126	0.00185	0.0009379 to 0.002761	Yes	****	<0.0001	pmEKAR4 vs U0126
														pmEKAR vs. SCH772984	0.005015	0.00396 to 0.006071	Yes	****	<0.0001	pmEKAR4 vs SCH772984
														U0126 vs. SCH772984	0.003166	0.002125 to 0.004207	Yes	****	<0.0001	U0126 vs SCH772984
														Test details	Mean 1	Mean 2	Mean Diff.	SE of diff.	n1	n2	q	DF
														pmEKAR vs. U0126	-0.002506	-0.004356	0.00185	0.0003807	27	29	6.871	70
														pmEKAR vs. SCH772984	-0.002506	-0.007522	0.005015	0.0004408	27	17	16.09	70
														U0126 vs. SCH772984	-0.004356	-0.007522	0.003166	0.0004348	29	17	10.3	70
