# Supplementary material for: Signaling diversity enabled by Rap1-regulated plasma membrane ERK with distinct temporal dynamics
Source: eLife. 2020 May 26;9:e57410. doi: 10.7554/eLife.57410 (PMC7289600; doi:10.7554/eLife.57410)
Supplement: Figure 3—source data 1. [file elife-57410-fig3-data1.xlsx]

## Sheet: Figure 3A-B
Values in time course data are Ratio of Y/C FRET	Rap1A-FLARE																Rap1A-FLARE + RAP1GAP																			Rap1B-FLARE
Due to differences in time for focusing between dishes, some cells may have "missing" data at certain time points	Time (Min)	Cell 1	Cell 2	Cell 3	Cell 4	Cell 5	Cell 6	Cell 7	Cell 8	Cell 9	Cell 10	Cell 11	AVERAGE	SEM			Time (Min)	Cell 1	Cell 2	Cell 3	Cell 4	Cell 5	Cell 6	Cell 7	Cell 8	Cell 9	Cell 10	Cell 11	Cell 12	Cell 13	Cell 14	AVERAGE	SEM			Time (Min)	Cell 1	Cell 2	Cell 3	Cell 4	Cell 5	Cell 6	Cell 7	Cell 8	Cell 9	AVERAGE	SEM
SEM = Standard Error of the Mean	-3.55767	1.01675	1.01493	1.02751	1.03035	1.00835	1.04641	0.998603	1.00717	0.999534	0.987181	0.999319	1.01237	0.00516929			-7.635	1.0096	1.00325	1.00773	1.01594	1.00319	1.02081	1.00218	1.01574	1.0044	0.997709	1.04727	0.981403	1.01152	1.00941	1.0093	0.00387212			-3.46478	0.980454	0.982178	1.00464	1.01376	1.01735	0.997957	0.994036	1.00399	0.977927	0.996921	0.00481478
	-3.05767	1.02823	1.01476	1.02425	1.02871	1.00699	1.04012	1.02888	1.02676	1.01404	0.985496	0.996265	1.01768	0.00487876			-7.135	1.00683	1.00615	1.00556	1.02415	0.997987	0.995024	1.00053	1.00511	0.999192	0.989274	1.02161	1.01518	1.00425	0.989345	1.0043	0.00281261			-2.96478	0.987221	0.981316	1.00575	1.00466	1.01796	1.00217	0.999425	1.00539	0.983603	0.99861	0.00404023
	-2.55767	1.02439	1.00755	1.00979	1.01969	1.00297	1.03367	1.0107	1.01318	1.00394	0.985954	0.999843	1.01015	0.00386703			-6.635	1.01837	1.00711	1.00603	1.01999	0.995809	0.995686	1.00141	1.01439	1.00376	0.992201	1.07513	1.00618	1.01272	0.997244	1.01043	0.00548375			-2.46478	0.996381	0.995293	1.01348	1.01196	1.01015	0.998706	0.997984	1.01306	0.980925	1.00199	0.0036657
	-2.05767	1.01371	1.01412	1.02388	1.02582	1.00617	1.02465	0.995821	1.00522	0.998532	0.986024	1.00938	1.00939	0.00384898			-6.135	1.01053	1.02121	1.01023	1.02308	1.00624	1.00944	1.01114	1.02568	1.01632	0.991828	1.05292	1.02321	1.01125	1.03146	1.01747	0.00379905			-1.96478	1.01431	0.991709	1.01812	1.01648	1.01787	0.994299	0.988701	0.998394	0.988468	1.00315	0.00440815
	-1.55767	1.01518	1.00776	1.01523	1.01394	1.00509	1.02156	0.996052	0.999854	0.999422	0.975658	1.0037	1.00486	0.00377787			-5.635	1.01062	0.995622	1.00651	1.00203	1.00379	0.996931	0.999183	0.999116	1.00794	0.996107	1.01241	0.974844	1.00352	0.980111	0.999195	0.00283965			-1.46478	1.01234	1.01352	1.0112	1.01453	1.03212	0.999955	0.999204	1.00274	0.98805	1.00818	0.00416925
	-1.05767	1.00832	1.00648	1.02525	1.01789	1.00303	1.01679	1.02269	1.0131	1.01526	0.997417	1.01201	1.01257	0.00250931			-5.135	1.01334	1.00486	0.99549	1.01477	1.00105	1.00196	1.00381	1.0075	0.992137	0.990739	1.04898	0.994752	1.00273	1.02103	1.00665	0.00400522			-1	1.01154	1.01228	1.01053	1.00422	1.0187	0.991118	0.996576			1.00642	0.00366504
	-0.5	1.00938	1.00756	1.03402	1.01065	1.00647	1.01417	1.01402	1.01007	1.01489			1.01347	0.00275206			-4.635	1.00537	0.995911	0.998953	1.01577	0.990735	1.00219	1.00512	1.00226	1.00354	0.984322	1.07407	1.01313	1.00161	1.06217	1.01108	0.00682719			-0.5	1.01323	1.01791	1.01247	1.01021	1.01063	1.00398	1.00099			1.00992	0.0021648
EGF addition	0	1	1	1	1	1	1	1	1	1	1	1	1	0			-4.135	1.00455	0.9947	0.997416	1.02041	0.987291	1.00886	0.991419	0.984842	1.00362	0.985183	1.01999	0.975025	0.999312	1.02042	0.999503	0.00384121		EGF Addition	0	1	1	1	1	1	1	1	1	1	1	0
	0.475167										1.08014	1.02091	1.05052	0.029614			-3.635	1.01135	1.00122	1.01459	1.01364	1.00742	1.01806	1.00339	0.99901	0.999562	0.991788	0.979143	0.948545	0.989883	1.00195	0.998539	0.00477487			0.475333								1.01804	1.02784	1.02294	0.00490366
	0.975167										1.1584	1.03143	1.09492	0.0634846			-3.135	1.0221	1.01166	1.01134	1.01667	0.998948	1.02492	1.01619	1.00759	1.0123	0.998492	1.03526	0.995213	0.992653	1.04699	1.01359	0.00410501			0.975333								1.08011	1.1129	1.0965	0.0163945
	1.31789	1.0759	1.21112	1.11426	1.05573	1.00925	1.03406	1.00346	1.07096	1.103	1.21484	1.03163	1.08402	0.0219302			-2.635	0.998545	1.0024	1.002	0.998921	0.976137	1.00933	1.01692	1.0119	0.998292	0.990965	1.04301	1.0063	1.0009	1.02696	1.0059	0.00426591			1.38117	1.04921	1.06135	1.05182	1.11616	1.07158	1.12729	1.14771	1.17043	1.17836	1.10821	0.0170694
	1.804	1.16419	1.40413	1.21664	1.18332	1.00943	1.09086	1.01333	1.22895	1.26456	1.25174	1.03509	1.16929	0.0370609			-2.135	1.0083	0.991109	1.00135	0.997784	0.984916	0.993112	0.989521	1.00007	0.990446	0.98537	1.08539	1.00978	0.997474	1.05136	1.00614	0.00754019			1.864	1.11476	1.16645	1.10779	1.21517	1.16678	1.27322	1.30146	1.24209	1.23141	1.20213	0.0225468
	2.304	1.20219	1.47934	1.24049	1.25122	1.01559	1.14341	1.04561	1.32907	1.37395	1.28048	1.04533	1.21879	0.0443926			-1.635	1.0123	1.00252	1.0085	1.00728	0.976419	0.999665	1.00242	1.00227	1.00388	0.982057	0.998054	0.961653	0.9941	1.00505	0.996869	0.00376832			2.364	1.1428	1.25246	1.11712	1.24655	1.22144	1.35835	1.3623	1.26938	1.24751	1.24643	0.0275382
	2.804	1.22253	1.49809	1.23691	1.28632	1.01365	1.1714	1.04259	1.3522	1.42252	1.27791	1.04857	1.23388	0.0474395		EGF Addition	0	1	1	1	1	1	1	1	1	1	1	1	1	1	1	1	0			2.864	1.12369	1.24798	1.11308	1.23889	1.26697	1.3763	1.37621	1.31437	1.24871	1.25624	0.0313562		EGF Addition
	3.304	1.22199	1.49527	1.21679	1.28549	1.01133	1.17916	1.04375	1.36963	1.44927	1.2957	1.0513	1.23815	0.0487918			0.4745	1.01361	0.99798	1.01271	1.01684	0.995639	1.02375	1.02128	0.997771	1.00689	1.00027	1.0118	0.973512	1.0023	1.01541	1.00641	0.003501			3.364	1.11522	1.23932	1.11766	1.22334	1.26092	1.37358	1.37218	1.31875	1.24456	1.25173	0.0315242
	3.804	1.23276	1.48903	1.20586	1.27893	1.01973	1.18316	1.05253	1.36642	1.4532	1.30198	1.04942	1.23936	0.0479811			0.9745	1.03189	1.02401	1.01516	1.0082	1.02411	1.03053	1.06906	1.01257	1.00509	1.00229	1.06512	1.00598	1.00559	1.07535	1.02678	0.00675516			3.864	1.08439	1.24038	1.10256	1.20663	1.27184	1.35064	1.35304	1.30382	1.23849	1.23909	0.0321279
	4.304	1.22118	1.45793	1.18549	1.26639	1.01506	1.17509	1.03121	1.34997	1.44116	1.30955	1.05365	1.22788	0.0467514			1.4745	1.032	1.02233	1.00599	1.03609	1.02729	1.05734	1.14486	1.03975	1.0072	1.01634	1.03667	1.01995	1.03373	1.03145	1.0365	0.00907678			4.364	1.08156	1.23304	1.0922	1.18828	1.28878	1.31687	1.31267	1.29256	1.22901	1.22611	0.0299043
	4.804	1.21991	1.43255	1.16588	1.26172	1.02022	1.1746	1.02054	1.32088	1.41678	1.31291	1.05625	1.21838	0.0443051			1.9745	1.0191	1.01416	1.00919	1.02883	1.02659	1.0711	1.20354	1.03818	1.00396	1.03347	1.02867	1.01144	1.04199	1.02444	1.03962	0.0133847			4.864	1.05317	1.19494	1.07102	1.15945	1.28182	1.29468	1.29716	1.28756	1.20898	1.20542	0.0317206
	5.304	1.21545	1.41982	1.1613	1.247	1.02364	1.17419	1.01916	1.29405	1.39502	1.31968	1.05806	1.21158	0.0422773			2.4745	1.02584	1.01842	1.0083	1.0254	1.04453	1.06657	1.22639	1.04078	1.00668	1.05008	1.08604	1.02181	1.04716	1.05616	1.05173	0.014714			5.364	1.06074	1.19894	1.07088	1.16275	1.29672	1.26176	1.26049	1.27327	1.18934	1.19721	0.0287939
	5.804	1.20227	1.38752	1.15356	1.22405	1.02592	1.16057	1.02058	1.27814	1.36514	1.32291	1.05416	1.19953	0.0395084			2.9745	1.00161	0.999606	1.00149	1.0021	1.03265	1.0525	1.1984	1.02291	0.997816	1.04758	1.14194	1.0295	1.03012	1.03294	1.04223	0.0155549			5.864	1.04931	1.17002	1.06307	1.14809	1.27469	1.23132	1.24091	1.25464	1.18954	1.18018	0.0270909
	6.304	1.18687	1.36052	1.14217	1.21225	1.02536	1.1568	1.02053	1.26139	1.34117	1.31895	1.05206	1.18892	0.0372197			3.4745	1.03649	1.01931	1.01918	1.02493	1.03313	1.06223	1.19931	1.02725	1.01741	1.05443	1.04877	0.997386	1.02504	1.00978	1.04105	0.0130335			6.364	1.03609	1.15296	1.05934	1.11838	1.27105	1.20824	1.21066	1.24627	1.18248	1.16505	0.0269289
	6.804	1.1765	1.33246	1.10474	1.20997	1.03167	1.14757	1.00937	1.23902	1.30009	1.31429	1.04878	1.17404	0.0350003			3.9745	1.01848	1.00757	1.00575	1.02277	1.01098	1.04345	1.16282	1.00836	1.00024	1.04401	1.0613	1.03311	1.04326	1.04736	1.03639	0.0109704			6.864	1.05312	1.11391	1.04535	1.11337	1.26611	1.17997	1.19563	1.2405	1.16643	1.15271	0.0257762
	7.304	1.15975	1.29319	1.10444	1.19523	1.0363	1.13979	1.00896	1.22543	1.27026	1.31325	1.05589	1.16386	0.0317935			4.4745	1.02925	1.0212	1.01524	1.0216	0.985404	1.03534	1.13905	1.00796	1.01347	1.04277	1.03947	1.03013	1.02328	1.05316	1.03267	0.00930839			7.364	1.04576	1.09888	1.03807	1.10573	1.25534	1.1685	1.18627	1.2379	1.15431	1.14342	0.0258407
	7.804	1.15327	1.26918	1.09096	1.18236	1.03352	1.13104	1.01242	1.19684	1.24207	1.30238	1.05623	1.15184	0.0292712			4.9745	1.01588	1.01792	1.0195	1.02309	1.00579	1.02079	1.11173	0.994318	0.997389	1.03722	1.05844	1.04227	1.03385	1.04611	1.03031	0.00794025			7.864	1.05512	1.12057	1.03777	1.09909	1.25933	1.14769	1.16277	1.22363	1.14863	1.1394	0.0240337
	8.304	1.14744	1.24972	1.07341	1.16816	1.03166	1.12201	1.00007	1.18035	1.21891	1.30606	1.06127	1.14173	0.0286926			5.4745	1.02892	1.02372	1.01627	1.02054	1.01571	1.03994	1.12004	1.00773	0.995505	1.03295	1.01889	1.0323	1.03267	1.06594	1.03222	0.00804579			8.364	1.04604	1.09073	1.0236	1.07443	1.26204	1.11981	1.13365	1.21811	1.14105	1.12327	0.0258281
	8.804	1.14158	1.2255	1.07385	1.15794	1.03878	1.11756	1.00894	1.1687	1.19638	1.32119	1.05766	1.1371	0.0275446			5.9745	1.01129	1.009	1.01218	1.00008	0.994604	1.00683	1.07481	0.986098	0.99736	1.02565	1.0803	1.02507	1.03865	1.06099	1.02307	0.00802764			8.864	1.04445	1.09709	1.03278	1.08252	1.25275	1.11282	1.14067	1.21238	1.13869	1.12379	0.0241807
	9.304	1.13918	1.20076	1.06839	1.14263	1.03885	1.10499	1.00616	1.14843	1.17333	1.30712	1.05953	1.12631	0.0255347			6.4745	1.02985	1.02587	1.01397	1.01216	1.00982	1.02489	1.06199	0.997954	1.0052	1.02423	1.0679	1.00005	1.03115	1.03306	1.02415	0.0055415			9.364	1.0442	1.07259	1.02451	1.07047	1.23755	1.09627	1.10861	1.21043	1.13174	1.11071	0.024041
	9.804	1.13222	1.18203	1.05257	1.134	1.03715	1.09543	0.999881	1.13773	1.15128	1.31143	1.06231	1.11782	0.025558			6.9745	1.0542	1.01665	1.01635	0.999261	0.990633	1.00963	1.05161	0.988632	1.00083	1.01899	1.14177	1.05334	1.06118	1.07669	1.03427	0.0112279			9.864	1.03022	1.08841	1.01907	1.07763	1.23429	1.0873	1.10344	1.19256	1.12609	1.10656	0.0233101
	10.304	1.12155	1.17222	1.05077	1.13255	1.03703	1.0884	1.00617	1.12051	1.13318	1.30957	1.0644	1.1124	0.0246953			7.4745	1.05243	1.01715	1.0159	1.0056	0.985651	1.01568	1.05573	1.00573	0.995353	1.0158	1.0923	1.05301	1.04159	1.06333	1.02966	0.00809995			10.364	1.03784	1.08495	1.02526	1.06416	1.24125	1.07188	1.09009	1.1848	1.1137	1.10155	0.0233213
	10.804	1.1182	1.16305	1.03922	1.10987	1.03734	1.08203	0.996403	1.09971	1.11436	1.3078	1.0624	1.10276	0.0248259			7.9745	1.04171	1.01175	1.01805	1.00125	1.00528	1.01386	1.04994	0.993163	1.0006	1.0052	1.05117	1.03252	1.05172	1.05513	1.02367	0.00599545			10.832						1.06516	1.0791	1.18191	1.10612	1.10807	0.0260393
	11.304	1.10713	1.14932	1.04072	1.1149	1.04091	1.07473	0.979266	1.08501	1.10541	1.29925	1.05835	1.09591	0.0245745			8.4745	1.057	1.02458	1.0118	1.01501	0.989295	1.00918	1.04347	0.997113	0.996634	1.00924	1.06678	1.03039	1.04993	1.0454	1.0247	0.00654889			11.332						1.05718	1.06734	1.16679	1.1037	1.09875	0.024781
	11.804	1.11052	1.14377	1.04299	1.1041	1.04169	1.07205	1.00102	1.08012	1.10282	1.29552	1.05842	1.09573	0.0232439			8.9745	1.03994	1.01654	1.00619	1.01103	0.995487	1.00907	1.03297	0.999196	1.007	1.00237	1.06757	1.02189	1.04205	1.04045	1.02084	0.00556838			11.8006	1.03389	1.03232	1.01269	1.10825	1.22139	1.04121	1.05178	1.15637	1.09054	1.08316	0.0229354
	12.304	1.09238	1.12981	1.03779	1.10067	1.04732	1.06886	0.99931	1.0825	1.09109	1.29483	1.05688	1.09104	0.0229664			9.4745	1.03317	1.01788	1.00806	1.01046	0.985545	0.996274	1.01928	0.98646	1.00491	1.00826	1.11153	1.07862	1.05196	1.0689	1.02724	0.0099854			12.2919	1.04582	1.06217	1.01769	1.03715	1.23018	1.04952	1.04954	1.1492	1.08202	1.08036	0.0224868
	12.804	1.09541	1.127	1.03849	1.10135	1.0443	1.06441	0.997048	1.07781	1.07817	1.28463	1.05957	1.08802	0.0222826			9.9745	1.0367	1.02607	0.995117	0.995237	0.996819	1.00726	1.01995	0.990572	1.00016	0.995493	1.06414	1.05887	1.05133	1.04451	1.02016	0.00708992			12.7919	1.04794	1.04834	1.02755	1.05282	1.23224	1.04694	1.04286	1.14088	1.06889	1.07872	0.0220432
	13.304	1.0934	1.10588	1.03247	1.09556	1.04642	1.05659	0.996838	1.07477	1.07514	1.28639	1.06536	1.08444	0.0222771			10.4745	1.05448	1.03872	1.00843	1.02046	1.00763	1.01409	1.02653	1.00936	1.0117	1.00729	1.03461	1.03586	1.0439	1.05159	1.02605	0.00455131			13.2919	1.02178	1.02954	1.0207	1.04215	1.20192	1.03609	1.03867	1.14511	1.06751	1.06705	0.0211714
	13.804	1.08644	1.10469	1.02149	1.09062	1.04537	1.05022	0.99571	1.06864	1.07537	1.2777	1.06033	1.07969	0.0219509			10.9745	1.04874	1.02836	1.00774	1.00511	1.00298	1.00873	1.02839	1.00257	1.0035	0.998152	1.06423	1.09812	1.04142	1.06152	1.02854	0.00812992			13.7919	1.01929	1.05892	1.01793	1.04543	1.19119	1.01748	1.03049	1.11961	1.04367	1.06045	0.0194898
	14.304	1.09051	1.10321	1.03709	1.07276	1.04808	1.05225	0.989231	1.05686	1.06377	1.2826	1.06284	1.07811	0.0222942			11.4745	1.04347	1.02199	1.00826	0.99003	0.990967	0.987856	1.0183	0.994593	0.987554	0.997907	1.02699	1.0859	1.04374	1.05163	1.0178	0.0079646			14.2919	1.02626	1.03823	1.0285	1.0349	1.19852	1.01931	1.02629	1.12643	1.04736	1.06064	0.0203384
	14.804	1.07887	1.09167	1.03213	1.0748	1.05287	1.04678	0.993347	1.05338	1.05214	1.28938	1.06505	1.07549	0.0227892			11.9745	1.04877	1.03098	1.00698	1.0074	0.986565	1.0119	1.03322	1.01098	1.00359	0.996981	1.03833	1.05553	1.02978	1.02712	1.02058	0.00537365			14.7919	1.02468	1.04437	1.01495	1.03855	1.17572	1.02807	1.02197	1.12159	1.03366	1.05595	0.018325
	15.304	1.07948	1.09694	1.03779	1.07433	1.05408	1.04222	0.997653	1.05514	1.05523	1.27859	1.05974	1.07556	0.0217096			12.4745	1.04501	1.03353	1.00921	1.00028	0.994235	1.0039	1.02278	1.00529	1.00207	1.00009	1.00821	1.03503	1.03727	1.03113	1.01629	0.00455287
	15.804	1.07829	1.08655	1.02259	1.07481	1.05394	1.04292	0.996917	1.05062	1.05464	1.28264	1.06367	1.07342	0.0222967			12.9745	1.03667	1.01345	1.00234	1.00279	0.975009	0.993533	0.999735	0.999177	1.00442	0.997132	1.05377	1.06228	1.04794	1.039	1.01623	0.00708443
	16.304	1.07643	1.08003	1.03713	1.06963	1.05094	1.03708	1.00072	1.05235	1.04812	1.27599	1.06234	1.07189	0.0214711			13.4745	1.03865	1.01814	1.00413	1.00458	0.995068	0.998411	1.00665	0.994006	1.00634	0.997642	1.07449	1.10744	1.04417	1.04393	1.02383	0.00908888
	16.804	1.08155	1.08178	1.04278	1.06959	1.05172	1.03279	0.996284	1.04719	1.04137	1.28021	1.0653	1.07187	0.0220902			13.9745	1.02615	1.00782	0.997378	0.998749	0.975393	0.996599	1.00173	0.99405	0.994477	0.996254	1.03974	1.04688	1.04549	1.01585	1.00975	0.00584543
	17.304	1.0814	1.07128	1.03431	1.07195	1.04998	1.02642	0.993909	1.04581	1.04099	1.27629	1.07038	1.06934	0.0220491			14.4745	1.04829	1.02926	1.0104	1.0047	0.992545	1.01088	1.02014	1.00953	1.0014	0.994094	1.05126	1.04526	1.04274	1.03777	1.0213	0.00554704
	17.804	1.07072	1.06756	1.02494	1.07211	1.05477	1.02759	0.997072	1.04132	1.04209	1.27438	1.06907	1.06742	0.0218866			14.9745	1.05543	1.02904	1.00614	1.00391	1.0009	1.01137	1.0113	1.00711	1.00914	0.995143	1.05878	1.04581	1.03255	1.01389	1.02004	0.0055323
	18.304	1.07013	1.06429	1.03275	1.0622	1.05638	1.02421	0.998012	1.03957	1.03637	1.28131	1.07814	1.06758	0.0224935			15.4745	1.04928	1.02286	1.01833	1.02086	1.00619	1.00775	1.02054	0.999789	1.00355	1.00185	1.07047	1.04064	1.03521	1.01507	1.02231	0.00543297
	18.804	1.06551	1.06054	1.02641	1.06072	1.05287	1.01905	0.999084	1.04225	1.04835	1.27456	1.07516	1.06586	0.0219372			15.9745	1.04876	1.01927	1.00842	1.02325	1.00839	1.00947	1.0245	0.995508	0.983373	0.991385	1.08616	1.03588	1.03266	1.03285	1.02142	0.00700294
	19.304	1.07083	1.06366	1.02104	1.06616	1.06231	1.02007	1.00565	1.0354	1.03959	1.27528	1.08062	1.06733	0.0220415			16.4745	1.02564	1.02492	1.00594	1.04247	1.00684	0.995388	1.02386	1.00611	1.0072	0.996799	1.05432	1.01399	1.02847	1.00303	1.01678	0.00461467
	19.804	1.05942	1.06178	1.02976	1.05852	1.06313	1.01506	0.995558	1.04653	1.03209	1.27422	1.07478	1.06462	0.0221437			16.9745	1.03234	1.01404	1.01543	1.01765	0.993889	0.992353	1.01783	0.996635	1.01315	0.998394	1.04456	1.05252	1.02488	0.99803	1.01512	0.00500509
	20.304	1.06606	1.06177	1.03888	1.06156	1.0711	1.01074	0.995681	1.03852	1.0395	1.26905	1.0737	1.06605	0.0216467			17.4745	1.04194	1.03106	1.01087	1.0284	1.01654	1.00985	1.0324	1.00802	1.00718	0.992674	1.04071	1.03378	1.03241	1.02803	1.02242	0.00394765
	20.804	1.05412	1.04931	1.0238	1.06168	1.07371	1.00555	0.992634	1.04532	1.02982	1.27043	1.07489	1.06193	0.0223075			17.9745	1.03962	1.01742	1.01968	1.02601	0.997727	1.00556	1.00876	1.01532	1.00219	0.996141	0.994379	1.02905	1.02253	1.00838	1.01305	0.00360998
	21.304	1.05801	1.05103	1.02349	1.05719	1.06808	1.00331	0.993437	1.04433	1.04147	1.26628	1.07598	1.06206	0.0218437			18.4745	1.02908	1.02349	1.00199	1.01411	0.996616	1.00004	1.0007	1.0038	0.996064	0.99189	1.06698	1.02589	1.02396	1.03768	1.01516	0.00556652
	21.804	1.06011	1.05638	1.02093	1.06273	1.07401	1.00278	0.996382	1.03688	1.02576	1.26425	1.07399	1.06129	0.0218812			18.9745	1.03359	1.01373	1.00053	1.00364	0.993478	0.995528	1.0099	0.996553	0.993665	0.986548	1.06603	1.02964	1.04142	1.01657	1.01291	0.00602953
	22.304	1.05923	1.05314	1.02217	1.07012	1.08072	0.99787	0.990215	1.03672	1.02669	1.26482	1.07273	1.06131	0.0222564			19.4745	1.02261	1.00559	0.995306	1.01798	1.00082	1.00391	0.995557	1.00487	0.989577	0.987041	1.05758	1.00744	1.01929	1.00472	1.00802	0.00473939
	22.804	1.05865	1.03923	1.01294	1.05937	1.07838	0.992343	0.985656	1.03874	1.02583	1.25836	1.06949	1.05627	0.0221556			19.9745	1.03879	1.02247	1.01182	1.02167	0.997487	0.995355	0.995456	1.00206	0.997609	0.993162	1.07866	1.02846	1.03636	1.03321	1.01804	0.00645776
	23.304	1.06408	1.05295	1.02198	1.06852	1.08067	0.991748	0.995938	1.03934	1.02715	1.26623	1.07727	1.06235	0.0223703			20.4745	1.04099	1.025	1.00884	1.03001	1.00235	1.01336	1.00852	0.999957	0.989176	0.990634	1.02892	1.00447	1.03586	1.02471	1.01449	0.00442322
	23.804	1.0597	1.05496	1.01142	1.06962	1.08719	0.991041	0.997419	1.04099	1.02829	1.26011	1.07259	1.06121	0.0220415			20.9745	1.04145	1.02181	1.01065	1.02891	1.01049	1.00912	1.01061	1.00969	1.0006	0.994664	1.04047	1.00966	1.02671	1.01789	1.01662	0.00368202
	24.5198	1.09281	1.06203	1.0117	1.07887	1.10215	1.00023	0.990644	1.03692	1.02934	1.256	1.07043	1.06647	0.0220472			21.4745	1.04109	1.02182	1.00583	1.01565	1.00919	1.0098	1.00118	1.00523	1.00311	0.99047	1.08074	1.02811	1.02975	0.973849	1.01542	0.00675476
	25.0111	1.07544	1.06631	1.03988	1.09747	1.10743	0.989103	0.991376	1.0356	1.03167	1.26152	1.07333	1.06992	0.0223966			21.9745	1.03982	1.01219	0.998063	1.02438	1.00241	0.999871	0.993711	1.00299	0.986125	0.987274	1.06666	1.04515	1.03366	1.03149	1.01599	0.00653407
																	22.4745	1.04684	1.02736	1.00598	1.02612	1.02435	1.0184	0.99259	1.00369	1.00391	0.994516	1.10019	1.07519	1.03433	1.03295	1.0276	0.00811861
																	22.9745	1.0386	1.0225	0.993122	1.02355	0.996345	0.997792	0.992895	1.00483	1.00029	0.990586	1.0184	1.01116	1.02238	1.01578	1.00916	0.00393474
[truncated: 18 more columns]

## Sheet: Figure 3C-D
	pmEKAR4 + Rap1GAP
	Time (Min)	Cell 1	Cell 2	Cell 3	Cell 4	Cell 5	Cell 6	Cell 7	Cell 8	Cell 9	Cell 10	Cell 11	Cell 12	Cell 13	Cell 14	Cell 15	Cell 16	Cell 17	Cell 18	Cell 19	Cell 20	Cell 21	Cell 22	Cell 23	Cell 24	Cell 25	Cell 26	Cell 27	Cell 28	Cell 29	Cell 30	Cell 31	Cell 32	Cell 33	Cell 34	Cell 35	Cell 36	Cell 37	Cell 38	Cell 39	Cell 40	Cell 41	Cell 42	Cell 43	Cell 44	Cell 45	Cell 46	Cell 47	Cell 48
	-5.68744	0.997906	0.987991	1.00835	0.973329	0.981096	0.961073	1.02423	0.996115	0.973689	1.01102	1.00343	0.98985	1.00099	1.01668	1.00986	1.00273	0.996611	0.997343	0.999042	0.982904	0.987489	0.988224	1.01454	0.999355	0.990281	0.975981	0.977502	1.01337	0.989051	1.01417	1.02544	1.00617	0.984221	1.01659	0.979392	0.996256	1.01713	0.996857	1.01834	1.01457	0.993165	1.00834	0.981486	1.01187	0.998793	1.00119	0.996217	1.00981
	-5.18744	0.992238	0.989865	1.00687	0.971702	0.979167	0.96582	1.01977	0.995505	0.979872	1.00829	1.00524	0.990352	0.998627	1.01906	1.00737	1.00076	0.997506	1.00232	0.995023	0.987506	0.992703	0.988448	1.01139	0.998512	0.993463	0.978328	0.976257	1.00779	0.988107	1.01234	1.02524	1.00287	0.986625	1.01396	0.979142	0.996609	1.01121	0.995381	1.01365	1.01386	0.984995	1.00432	0.980108	0.99933	0.997216	0.998526	0.996375	1.00959
	-4.68744	0.992817	0.988602	1.00435	0.96937	0.978843	0.965392	1.01786	0.99715	0.974322	1.00659	0.999659	0.990357	0.997067	1.02365	1.01389	1.00413	0.996795	1.00445	1.00244	0.98869	0.989811	0.988586	1.0112	0.997834	0.993484	0.97871	0.974433	1.00735	0.988293	1.00759	1.0226	1.00457	0.991925	1.01436	0.982763	0.995157	1.0114	1.00299	1.02134	1.01241	0.991777	1.00692	0.985713	0.989528	0.999989	1.00229	1.00014	1.01196
	-4.18744	0.992002	0.988539	1.00317	0.973943	0.978758	0.966961	1.01727	0.998232	0.982348	1.00799	1.00114	0.995742	0.99722	1.02964	1.01073	1.00165	1.00456	1.00188	0.99605	0.987264	0.995854	0.987136	1.00912	0.995369	0.994373	0.982524	0.980638	1.01595	0.988826	1.00812	1.02266	1.0065	0.990452	1.01512	0.981058	0.995633	1.00774	0.99293	1.00671	1.01018	0.986073	1.00156	0.981185	1.00135	0.991441	1.00505	1.00368	1.01448
	-3.69531	0.993881	0.986394	1.00452	0.973175	0.981156	0.971206	1.01715	0.996451	0.979894	1.00698	1.0044	0.994922	0.995753						0.995495	0.990493	0.998999	0.989796	1.01052	0.99595	0.992961	0.985617	0.983861	1.01544	0.994012	1.01231	1.01959	1.00658	0.994245	1.01486	0.983816	0.996603	0.994598	0.993919	1.00655	1.00758	0.987483	0.999165	0.978416	0.993041	0.989332	1.00592	1.00269	1.01281
	-3.18744	0.993405	0.990246	1.01034	0.985214	0.984491	0.976641	1.01462	0.99666	0.988508	1.00825	1.00413	0.996977	1.00157	1.01722	1.01266	1.00337	1.00106	1.0029	0.995277	0.987315	0.996136	0.98848	1.00966	1.00025	0.995429	0.986073	0.983772	1.01322	0.991677	1.00897	1.01678	1.00803	0.996929	1.01405	0.987296	1.00031	1.02614	1.02143	1.03717	1.03646	1.02048	1.02897	1.01508	1.02148	1.02954	1.03915	1.03389	1.0463
	-2.68744	0.992841	0.99349	1.0062	0.980514	0.982101	0.978545	1.01308	0.99304	0.990721	1.00588	1.00355	0.99903	1.00229	1.00755	1.0087	1.00449	0.996445	1.00362	1.00842	0.990831	0.993549	0.988378	1.00649	0.996042	0.998506	0.984644	0.985132	1.01279	0.996987	1.00927	1.01773	1.0062	1.0004	1.01447	0.988674	0.997567	0.983225	0.998183	0.999054	1.00375	0.990178	0.999596	0.985121	0.98802	0.992839	0.999549	1.00166	1.01278
	-2.18744	0.991997	0.989277	1.00622	0.984554	0.987037	0.980474	1.01274	0.994551	0.990339	1.00697	1.00245	0.999114	1.0044	1.01798	1.01488	1.00911	1.00414	1.00444	1.00697	0.997869	1.0021	0.989067	1.00695	0.999206	0.99504	0.988589	0.986327	1.00755	0.99956	1.00876	1.01321	1.00796	1.00155	1.01572	0.985384	0.996165	0.923496	0.934258	0.937009	0.940425	0.924298	0.938696	0.926674	0.926653	0.93203	0.943912	0.94005	0.951732
	-1.70681	0.993436	0.998238	1.00648	0.992599	0.992258	0.98234	1.01169	0.994757	0.999006	1.00381	1.00195	0.998873	1.00365	1.0146	1.01039	1.00616	1.00059	1.00174						0.996132	0.999223	0.990635	0.988863	1.017	0.994495	1.00671	1.01645	1.00741	1.00177	1.01493	0.989169	0.998063	0.981974	1.00001	0.996956	1.00467	0.988219	0.999277	0.987111	0.989774	0.99447	1.00292	0.998604	1.00725
	-1.23106																								0.997387	0.997373	0.99165	0.990925	1.01074	0.99827	1.00752	1.01267	1.01031	1.00684	1.01554	1.00022	1.00099
EGF Addition	0	1	1	1	1	1	1	1	1	1	1	1	1	1	1	1	1	1	1	1	1	1	1	1	1	1	1	1	1	1	1	1	1	1	1	1	1	1	1	1	1	1	1	1	1	1	1	1	1
	0.475524	0.992773	0.997451	0.996373	0.996308	0.993953	0.993484	0.999044	0.994457	0.997736	0.999433	0.996496	0.999183	1.00004	1.00087	1.00377	1.00047	0.992487	0.998916	0.999556	0.998659	0.993345	0.997227	0.996138	0.996196	0.996465	0.999837	1.00464	0.996299	0.990045	0.993721	0.989403	1.01449	1.01866	1.01298	1.00009	0.99861	0.994337	1.00318	0.993861	0.99693	0.992333	0.997065	0.990821	0.987564	0.995462	1.00086	0.995545	1.00478
	0.975833	0.99218	0.996835	0.993843	0.994673	0.985893	0.989742	0.999193	0.991796	1.00342	0.99461	0.996302	1.0006	0.997781	0.999307	0.993174	0.998931	0.992289	1.00425	0.990647	1.00061	0.996838	0.992746	0.993387	0.990348	0.994037	0.99614	1.00026	0.998194	0.988878	1.00114	0.991724	1.01741	1.01909	1.01415	0.999881	0.994179	0.990107	0.997346	0.990345	0.99327	0.991211	0.998705	0.989799	0.984693	0.993487	1.00129	0.991401	1.00496
	1.47583	0.983988	0.994446	0.993838	0.998763	0.98784	0.989148	0.999083	0.989979	0.991766	0.992272	0.99261	1.00118	0.998549	0.999515	0.996063	0.998618	0.98784	1.00253	1.00949	1.00394	0.983828	1.00083	0.988881	0.990015	0.987269	1.00048	1.0066	1.02386	0.992459	1.01054	0.991436	1.01722	1.0185	1.01667	0.997251	0.993056	0.989527	0.998054	0.994287	0.987276	0.991652	0.99719	0.98471	0.98216	0.992501	0.999559	0.990697	1.00499
	1.97583	0.989102	0.992719	0.999361	0.99756	0.986635	0.990512	0.996796	0.990524	0.998768	0.988549	0.993577	0.999387	1.00039	0.993428	0.992105	1.0002	0.992122	1.00353	1.00372	1.00211	0.986319	1.00134	0.987542	0.990662	0.99259	1.00195	1.00626	1.06687	0.99718	1.05618	0.998335	1.02291	1.02758	1.02186	0.995167	0.995816	0.982455	0.989433	0.995625	0.986594	0.999684	0.996206	0.982712	0.98727	0.991549	1.0011	0.991394	1.00531
	2.47583	0.983189	0.993032	1.01002	0.997425	0.9865	0.988154	0.994992	0.990351	0.99748	0.994014	0.991224	0.999371	1.00303	1.00477	0.990793	0.997016	0.99565	1.01921	0.986046	1.00456	0.996117	0.990113	0.987415	0.988009	0.996506	0.9998	1.00931	1.12724	0.993329	1.12081	1.0078	1.01461	1.03101	1.02869	0.998877	1.0066	0.9948	1.0006	1.0064	0.995561	1.00671	0.99788	0.981095	0.988156	0.995574	0.996471	0.989118	1.00302
	2.97583	0.99195	0.99579	1.03229	1.00271	0.989098	0.995546	0.996039	0.989584	0.993469	0.992518	0.988118	0.992853	0.998263	1.01174	0.992059	1.00088	1.01203	1.05704	0.999766	1.00957	0.992695	0.996497	0.985248	0.987314	0.991187	0.997576	1.00341	1.19993	1.00542	1.20347	1.01674	1.0144	1.04812	1.04127	1.00457	1.03626	0.993658	1.00736	1.02847	0.986177	1.01712	1.0009	0.977013	0.98353	0.992417	0.994989	0.989315	1.0023
	3.47583	0.989368	1.00168	1.06138	1.00233	0.991093	1.00727	0.989789	0.988996	1.00585	1.00626	0.991708	0.99545	1.0004	1.03378	0.989887	0.99615	1.04454	1.09131	1.00158	1.0188	1.00049	0.996288	0.984072	0.997318	0.994938	1.00555	1.01516	1.25512	1.01781	1.26379	1.0274	1.02025	1.06327	1.05188	1.01537	1.07846	0.982462	1.01067	1.04717	0.994067	1.03575	1.00309	0.973762	0.979164	0.993862	1.0023	0.991091	1.00214
	3.97583	0.995918	0.998835	1.10586	1.00912	0.996011	1.02255	0.988914	0.987293	1.012	1.03467	0.989761	0.995659	0.997393	1.0623	0.993476	0.999203	1.09219	1.1157	1.00618	1.02263	1.00596	1.00261	0.984369	1.0142	0.997661	1.0047	1.01382	1.27878	1.02564	1.30202	1.03266	1.01763	1.07726	1.06443	1.03129	1.13044	0.989067	1.03644	1.07166	0.999908	1.05395	1.01081	0.967698	0.976538	0.986851	0.99095	0.986695	0.998196
	4.47583	1.00231	1.00578	1.15882	1.02074	0.997697	1.04668	0.987004	0.989484	1.02993	1.07794	0.997012	0.996221	0.993974	1.09996	0.994015	0.991673	1.15223	1.12955	0.989808	1.03046	1.02243	0.999934	0.985225	1.0442	0.998298	1.00722	1.02198	1.29974	1.0378	1.32272	1.03909	1.0132	1.08804	1.07941	1.04784	1.1708	0.999908	1.07677	1.09328	1.01588	1.07666	1.02136	0.974696	0.986369	0.994048	1.00018	0.997646	1.01002
	4.97583	1.00211	1.00093	1.20605	1.01911	1.00089	1.05893	0.987009	0.989752	1.04683	1.12677	1.00221	0.999372	0.994868	1.1317	0.995235	0.996265	1.19195	1.12979	0.990416	1.03834	1.04817	1.00326	0.983603	1.08414	1.0058	1.01255	1.02968	1.3045	1.04908	1.3381	1.04753	1.0199	1.10154	1.09424	1.06322	1.19784	1.01071	1.10078	1.10126	1.02414	1.09169	1.0293	0.974732	0.98898	0.997393	1.00046	0.99631	1.01034
	5.47583	1.01222	1.00799	1.24714	1.03324	1.00956	1.07786	0.98538	0.990633	1.07059	1.17142	1.0055	0.99725	0.995708	1.14825	0.995001	0.990815	1.22912	1.12814	1.0016	1.04571	1.06705	1.01519	0.985687	1.11572	1.00828	1.01924	1.0385	1.31139	1.05645	1.34907	1.04799	1.01508	1.10938	1.11049	1.07922	1.21551	1.01061	1.11577	1.11236	1.03668	1.10121	1.03872	0.972588	0.987743	0.999872	1.00129	0.998205	1.01138
	5.97583	1.01072	1.00701	1.27214	1.03601	1.01239	1.08874	0.98569	0.993338	1.09481	1.20524	1.01013	0.998629	0.993142	1.17247	0.991803	0.993426	1.26283	1.12685	1.01076	1.05395	1.08863	1.0253	0.989673	1.15623	1.01278	1.0282	1.05039	1.30732	1.05615	1.3498	1.04987	1.01767	1.12368	1.13017	1.09092	1.2194	1.02374	1.13962	1.11756	1.04953	1.10956	1.04703	0.979472	0.994833	1.00621	1.00168	1.00118	1.01429
	6.47583	1.01853	1.01673	1.28558	1.04478	1.02069	1.0975	0.984573	0.997145	1.11581	1.22279	1.01686	1.00024	0.990083	1.17855	0.999215	0.999485	1.2744	1.12378	1.01524	1.06246	1.10255	1.03522	0.990883	1.1893	1.02131	1.04052	1.07369	1.30756	1.06234	1.35055	1.05796	1.01765	1.12494	1.14636	1.09933	1.23002	1.0335	1.14118	1.1184	1.06094	1.11953	1.04835	0.987138	0.994636	1.01457	1.00442	1.00341	1.01771
	6.97583	1.02334	1.01547	1.29973	1.05169	1.0287	1.10447	0.989991	0.999251	1.12356	1.23843	1.02106	1.00351	0.995301	1.17878	1.00038	0.997581	1.2875	1.13453	1.0223	1.0794	1.12037	1.05209	0.997117	1.20425	1.03297	1.05029	1.09032	1.30404	1.06319	1.34828	1.05288	1.01994	1.13466	1.15934	1.1066	1.23275	1.03454	1.1478	1.11706	1.0626	1.1151	1.0482	0.990094	0.992969	1.01545	1.00466	1.00567	1.0186
	7.47583	1.0344	1.02279	1.30327	1.05912	1.03746	1.11494	0.988678	0.997888	1.13948	1.24098	1.02878	1.00441	0.991721	1.18943	0.999241	0.991698	1.29118	1.13352	1.03399	1.09415	1.14431	1.05952	1.00487	1.21989	1.04258	1.06071	1.1081	1.29708	1.06628	1.35031	1.05561	1.01611	1.139	1.17386	1.11007	1.23328	1.02534	1.14862	1.12005	1.06344	1.12037	1.05012	0.99735	0.991008	1.0223	1.00209	1.00434	1.01905
	7.97583	1.03675	1.03119	1.30885	1.06684	1.04554	1.11921	0.986796	1.00279	1.14237	1.24085	1.0336	1.00838	0.990438	1.18814	0.998656	0.993816	1.29531	1.12638	1.04026	1.10358	1.14957	1.07489	1.01007	1.22321	1.04976	1.0693	1.12528	1.30642	1.06897	1.35147	1.05772	1.01931	1.1471	1.18861	1.11293	1.23454	1.02664	1.14863	1.11861	1.07695	1.12243	1.05392	1.00166	0.998636	1.02933	1.00341	1.00808	1.02045
	8.47583	1.04616	1.03656	1.30299	1.07043	1.05134	1.11856	0.988703	1.00368	1.14325	1.24575	1.04138	1.00929	0.990152	1.17889	1.0061	0.993606	1.29899	1.1295	1.04968	1.12403	1.17247	1.08043	1.01985	1.22963	1.05534	1.07894	1.13094	1.31964	1.07224	1.35463	1.05873	1.02093	1.14766	1.19824	1.11276	1.23315	1.04411	1.1563	1.11762	1.07613	1.11978	1.05369	1.01402	1.00461	1.03573	1.00209	1.00686	1.02314
	8.97583	1.04793	1.04516	1.3025	1.07992	1.05838	1.11834	0.987102	1.00705	1.14483	1.24735	1.04419	1.00821	0.986151	1.18029	1.00543	0.992551	1.293	1.13118	1.05232	1.13368	1.19732	1.08381	1.03268	1.23477	1.06409	1.0846	1.13985	1.30917	1.06767	1.34823	1.05006	1.01909	1.14734	1.21031	1.11615	1.23577	1.04421	1.15036	1.11892	1.08068	1.12337	1.05175	1.02352	1.00872	1.04308	0.999492	1.00665	1.02402
	9.47583	1.05384	1.05844	1.31131	1.08678	1.06556	1.11479	0.990211	1.00978	1.14943	1.25062	1.05193	1.01133	0.988107	1.18472	1.00489	0.994199	1.29729	1.12712	1.05383	1.14494	1.19993	1.08996	1.04319	1.23328	1.06935	1.0935	1.15333	1.3077	1.07014	1.35013	1.05274	1.02053	1.14839	1.21832	1.1171	1.2391	1.04865	1.14835	1.11557	1.07789	1.11924	1.0494	1.02861	1.00674	1.04573	0.998653	1.00486	1.02486
	9.97583	1.06057	1.06172	1.30814	1.09051	1.07052	1.1234	0.987001	1.0107	1.14854	1.251	1.05648	1.01162	0.989339	1.18403	1.01208	0.996305	1.29788	1.13339	1.07133	1.15368	1.21031	1.10787	1.05097	1.23519	1.07542	1.09443	1.15985	1.32169	1.07298	1.34397	1.05087	1.02132	1.15314	1.22855	1.12075	1.23725	1.05276	1.15795	1.11182	1.08161	1.114	1.04798	1.03477	1.00797	1.04693	1.00562	1.00923	1.02835
	10.4758	1.06232	1.06751	1.3061	1.09514	1.0713	1.1222	0.990529	1.01262	1.13894	1.24493	1.06177	1.01397	0.993163	1.17857	1.01321	0.990343	1.29454	1.1278	1.08354	1.16024	1.20983	1.12174	1.06258	1.23147	1.07899	1.0994	1.16481	1.3054	1.07304	1.34032	1.05501	1.01866	1.15688	1.23784	1.12261	1.23416	1.06062	1.15352	1.11547	1.08946	1.12209	1.04908	1.04394	1.00393	1.05353	1.00102	1.00735	1.03177
	10.9758	1.06717	1.07509	1.30724	1.09664	1.07654	1.12216	0.990679	1.01229	1.14543	1.24737	1.06678	1.01474	0.990466	1.17536	1.01046	0.995868	1.29782	1.12984	1.09124	1.16935	1.21122	1.1277	1.07224	1.23723	1.08362	1.10629	1.17527	1.31478	1.07551	1.34705	1.05013	1.02196	1.15439	1.24401	1.11918	1.2327	1.04942	1.15386	1.11557	1.081	1.12148	1.04844	1.04986	1.001	1.05763	1.00205	1.00659	1.03253
	11.4758	1.07101	1.08043	1.30639	1.10222	1.08471	1.12096	0.990498	1.01353	1.14825	1.24649	1.07396	1.01739	0.990425	1.17396	1.00976	0.993173	1.29316	1.12993	1.09772	1.17043	1.22055	1.12953	1.08087	1.23909	1.08719	1.11143	1.17932	1.31148	1.07278	1.347	1.05034	1.02328	1.15604	1.25013	1.12492	1.23198	1.06228	1.16029	1.11086	1.09287	1.12574	1.0494	1.05491	1.00873	1.06045	1.00404	1.00831	1.03571
	11.9758	1.07074	1.08251	1.30563	1.09873	1.08169	1.11569	0.98957	1.0134	1.14523	1.24465	1.0735	1.01909	0.993796	1.17921	1.01155	0.997876	1.29569	1.1322	1.09765	1.1705	1.21607	1.13742	1.09105	1.23435	1.08872	1.11323	1.17947	1.31358	1.06856	1.33886	1.05096	1.02306	1.15626	1.25463	1.12474	1.23299	1.06216	1.15005	1.10916	1.09586	1.12051	1.04695	1.06002	1.01066	1.06154	1.00259	1.00591	1.03721
	12.4758	1.07717	1.09192	1.30674	1.1031	1.08679	1.10931	0.994009	1.01784	1.14697	1.24737	1.07679	1.0161	0.989959	1.17349	1.01538	0.998481	1.28866	1.13169	1.1117	1.17579	1.21942	1.13607	1.10102	1.23004	1.08581	1.1116	1.18079	1.31491	1.07038	1.34107	1.05372	1.02356	1.15752	1.26301	1.12125	1.23106	1.05667	1.14995	1.10698	1.0896	1.11848	1.04592	1.06635	1.00719	1.06284	1.00192	1.0026	1.03595
	12.9758	1.08782	1.09383	1.30823	1.11067	1.08928	1.11238	0.992728	1.01549	1.14924	1.24787	1.08072	1.01883	0.991162	1.15873	1.01782	1.00069	1.28982	1.13112	1.11799	1.17511	1.22219	1.14193	1.10729	1.23699	1.08992	1.11518	1.18696	1.30837	1.06409	1.3447	1.04847	1.02876	1.15801	1.26247	1.1259	1.22893	1.05975	1.1523	1.10724	1.09107	1.12541	1.04804	1.06835	1.00192	1.06789	1.00089	1.00275	1.03844
	13.4758	1.09276	1.1027	1.31207	1.10657	1.09039	1.10725	0.994217	1.02022	1.14791	1.24445	1.08327	1.017	0.990165	1.1733	1.02032	1.00812	1.28979	1.12777	1.11354	1.17695	1.22448	1.14297	1.11323	1.23062	1.09121	1.11402	1.18806	1.3137	1.06227	1.3372	1.0467	1.01901	1.15699	1.26629	1.12441	1.22698	1.06328	1.14439	1.0999	1.09103	1.12289	1.04641	1.07135	1.00725	1.06716	1.00237	1.00089	1.03804
	13.9758	1.09673	1.10255	1.30703	1.1146	1.09261	1.11636	0.994685	1.01546	1.15325	1.24697	1.08339	1.01563	0.994602	1.15599	1.02211	1.0072	1.29189	1.13165	1.1139	1.18357	1.23057	1.14726	1.11979	1.23427	1.09432	1.11618	1.18468	1.3066	1.06621	1.33854	1.04762	1.02462	1.15964	1.27068	1.12338	1.22666	1.06574	1.14638	1.10107	1.09095	1.12347	1.03944	1.07315	1.01753	1.06949	1.00443	1.00335	1.04133
	14.4758	1.09485	1.10674	1.30902	1.11381	1.09229	1.11015	0.992518	1.01821	1.15405	1.24428	1.08693	1.0186	0.99571	1.15988	1.01871	1.00504	1.29763	1.12961	1.12028	1.18142	1.23217	1.15155	1.12748	1.23065	1.09444	1.11702	1.18511	1.30782	1.06807	1.33578	1.04284	1.02335	1.16082	1.27451	1.12296	1.22434	1.03802	1.10897	1.07034	1.06447	1.10028	1.01286	1.05201	0.995237	1.05124	0.990985	0.982455	1.01988
	14.9758	1.09605	1.11143	1.31095	1.11392	1.09555	1.10978	0.996282	1.02132	1.14882	1.23998	1.08694	1.01787	0.994322	1.15954	1.02329	1.00758	1.29647	1.12662	1.1141	1.18417	1.23436	1.15528	1.131	1.23088	1.09442	1.12034	1.18757	1.30571	1.06922	1.33298	1.04394	1.02623	1.15625	1.27926	1.12197	1.22593	1.05612	1.15883	1.09844	1.09002	1.12152	1.03512	1.0741	1.00806	1.06944	1.00848	1.00245	1.04213
	15.4758	1.10278	1.11203	1.30242	1.11293	1.09934	1.11277	0.998943	1.02166	1.15627	1.24328	1.09088	1.01727	0.997597	1.152	1.02119	1.00784	1.28993	1.12579	1.12022	1.18617	1.23439	1.1557	1.13372	1.23878	1.09996	1.1212	1.19036	1.2991	1.06186	1.33104	1.04395	1.02827	1.15511	1.2773	1.12679	1.2292	1.06843	1.14415	1.09562	1.08711	1.12005	1.03404	1.07401	1.01341	1.07106	1.00351	1.00087	1.04216
	15.9758	1.10187	1.11503	1.30548	1.11748	1.09805	1.11496	0.992841	1.02057	1.15627	1.24228	1.09146	1.02145	0.998399	1.14779	1.02217	1.00699	1.28665	1.1196	1.11877	1.18385	1.23589	1.16069	1.13903	1.23407	1.09717	1.11898	1.18518	1.28754	1.07145	1.32959	1.04353	1.02624	1.15699	1.28022	1.12663	1.22536	1.06554	1.15664	1.09115	1.08963	1.1232	1.02996	1.07656	1.01235	1.07043	1.00533	1.0021	1.04352
	16.4758	1.10217	1.11626	1.30831	1.11074	1.10081	1.1122	0.996367	1.02342	1.15625	1.23958	1.09164	1.01887	0.996196	1.14769	1.02015	1.0156	1.28915	1.12472	1.12414	1.18458	1.23664	1.18431	1.14245	1.23524	1.09757	1.12276	1.19375	1.2858	1.06751	1.32076	1.03984	1.02324	1.15679	1.28284	1.12879	1.22944	1.06424	1.1459	1.09197	1.08597	1.1214	1.02762	1.07732	1.0022	1.07127	1.00467	1.00078	1.04263
	16.9758	1.10594	1.11763	1.30644	1.11361	1.10447	1.11116	0.995314	1.02209	1.15085	1.2426	1.09064	1.01823	0.997861	1.14271	1.01931	1.01365	1.27938	1.12375	1.12388	1.18616	1.23307	1.16599	1.14433	1.23321	1.0955	1.12393	1.19349	1.28785	1.07329	1.32649	1.04227	1.02559	1.15621	1.28943	1.12443	1.22334	1.07059	1.16135	1.08868	1.09088	1.12139	1.02729	1.07618	1.0095	1.07194	1.00317	0.998723	1.04542
	17.49	1.10916	1.1196	1.3043	1.11499	1.10463	1.11276	0.996672	1.02146	1.15173	1.23621	1.09364	1.01659	1.00288	1.14011	1.02181	1.01316	1.2779	1.12306	1.11396	1.18067	1.23534	1.16445	1.14979	1.23416	1.10156	1.12607	1.19429	1.29083	1.06991	1.32264	1.03868	1.02772	1.15429	1.29212	1.12768	1.22528	1.06573	1.1574	1.09318	1.09254	1.12271	1.02994	1.08056	1.02537	1.0718	1.00352	1.00036	1.04732
	17.99	1.10491	1.11763	1.30358	1.11163	1.09954	1.10608	0.993378	1.0232	1.14508	1.24154	1.09345	1.01923	1.00392	1.13386	1.02349	1.01223	1.28348	1.12209	1.11887	1.17705	1.23455	1.16702	1.15014	1.23598	1.098	1.12457	1.19695	1.28338	1.0696	1.31374	1.03784	1.02838	1.15288	1.29103	1.12909	1.22367	1.0663	1.1426	1.08504	1.08268	1.11226	1.02497	1.07717	1.01057	1.07281	1.00196	0.997446	1.04122
	18.49	1.11188	1.1195	1.30157	1.11394	1.10704	1.11143	0.995178	1.02174	1.14346	1.23677	1.09502	1.01649	1.0037	1.13519	1.01929	1.01454	1.27888	1.12237	1.11575	1.18133	1.23141	1.17035	1.15224	1.23443	1.09649	1.1243	1.1982	1.27996	1.06321	1.3199	1.0396	1.03233	1.15647	1.2928	1.12535	1.22369	1.05668	1.14969	1.08708	1.08812	1.11624	1.02552	1.07695	1.0189	1.07154	1.00135	0.998402	1.0465
	18.99	1.10549	1.1152	1.29528	1.10851	1.10163	1.11	0.995424	1.0206	1.15085	1.23467	1.09554	1.01695	1.00185	1.1281	1.02184	1.01124	1.27763	1.11931	1.11152	1.18122	1.23166	1.16838	1.15341	1.23225	1.09549	1.11931	1.20024	1.2753	1.06753	1.31477	1.03512	1.02809	1.15468	1.29337	1.12779	1.22183	1.05922	1.13986	1.08234	1.09121	1.11222	1.02204	1.07556	1.00259	1.07115	1.00058	0.995389	1.04468
	19.49	1.10948	1.11768	1.30274	1.10965	1.10341	1.1115	0.999143	1.02377	1.15029	1.23578	1.09919	1.01584	1.00738	1.12958	1.02098	1.00958	1.27341	1.11493	1.10768	1.18361	1.2327	1.16826	1.15864	1.22902	1.09268	1.12159	1.19667	1.26751	1.06239	1.30935	1.03333	1.03437	1.15033	1.29763	1.12851	1.22303	1.05672	1.14155	1.08082	1.08478	1.10873	1.01727	1.07603	1.01858	1.06978	1.00089	0.993916	1.04454
	19.99	1.10835	1.11745	1.29787	1.11059	1.10856	1.10942	0.998174	1.0242	1.1436	1.22849	1.09691	1.01542	1.00089	1.13035	1.02894	1.01312	1.27311	1.12075	1.11496	1.18683	1.23673	1.16695	1.15896	1.2302	1.09711	1.11779	1.20074	1.25936	1.06895	1.31018	1.03604	1.03086	1.15247	1.29616	1.1281	1.21964	1.05006	1.13043	1.07918	1.08538	1.10988	1.01486	1.07573	1.01117	1.06974	1.00061	0.992325	1.04196
	20.49	1.11114	1.11756	1.29737	1.11629	1.10588	1.11391	0.996362	1.02522	1.13618	1.22908	1.09924	1.01467	1.00443	1.1191	1.02734	1.00554	1.2698	1.11959	1.1176	1.18034	1.2363	1.17126	1.15816	1.2292	1.09441	1.11889	1.2004	1.259	1.06373	1.31185	1.03285	1.03133	1.14902	1.29602	1.12614	1.22016	1.05251	1.13251	1.07624	1.08604	1.10685	1.01604	1.0739	1.0191	1.07098	1.00268	0.994426	1.04455
	20.99	1.10691	1.11991	1.29788	1.11061	1.10674	1.11485	0.998659	1.02839	1.13479	1.22777	1.1022	1.01288	1.00377	1.11252	1.03015	1.01493	1.26628	1.11996	1.11314	1.18251	1.23272	1.17498	1.15964	1.22719	1.09269	1.12146	1.20081	1.25787	1.05898	1.30015	1.0311	1.03107	1.1527	1.29873	1.12518	1.2189	1.04833	1.13548	1.07145	1.08636	1.10847	1.01029	1.07206	1.00973	1.06778	0.998382	0.991986	1.03998
	21.49	1.10796	1.11735	1.29719	1.10876	1.1067	1.11285	0.995042	1.02726	1.13295	1.22428	1.09819	1.00942	1.00551	1.11042	1.02321	1.00749	1.26861	1.11403	1.119	1.17986	1.23509	1.1686	1.16176	1.22968	1.0935	1.12413	1.20315	1.26488	1.06327	1.30118	1.03465	1.0295	1.15096	1.29982	1.1264	1.21896	1.04871	1.13656	1.07806	1.08379	1.10713	1.01332	1.07417	1.00733	1.07016	1.00194	0.994775	1.04362
	21.99	1.10908	1.1207	1.29992	1.11086	1.10646	1.11616	0.996488	1.02773	1.12831	1.22462	1.10209	1.01424	1.00724	1.11197	1.02933	1.01181	1.26607	1.11473	1.10983	1.18519	1.23275	1.16837	1.16165	1.22715	1.08985	1.12141	1.20291	1.25467	1.06273	1.2986	1.03017	1.03612	1.14846	1.29912	1.1249	1.21826	1.04716	1.12915	1.07257	1.08831	1.10249	1.00929	1.06914	1.01492	1.0672	1.00182	0.990714	1.04052
	22.49	1.10653	1.1172	1.29414	1.1139	1.10749	1.11386	0.998685	1.02831	1.13491	1.22068	1.09981	1.01459	1.0081	1.11272	1.03244	1.01037	1.26369	1.11166	1.11409	1.18308	1.23381	1.17357	1.16127	1.22503	1.0908	1.12535	1.20304	1.25712	1.06405	1.29793	1.03052	1.03597	1.14772	1.30341	1.12384	1.21265	1.03506	1.12736	1.07074	1.07801	1.11487	1.01813	1.07049	1.01129	1.06825	1.00268	0.988212	1.04387
	22.99	1.10418	1.11658	1.29272	1.11283	1.10325	1.11305	0.996892	1.03104	1.12833	1.21782	1.09962	1.00964	1.01105	1.10233	1.03122	1.01045	1.25694	1.10811	1.113	1.18125	1.23105	1.17306	1.1628	1.22355	1.08895	1.12039	1.19949	1.25651	1.06153	1.29466	1.02848	1.03659	1.14838	1.3059	1.12383	1.21292	1.04213	1.12967	1.07459	1.07878	1.11253	1.01972	1.06599	1.00847	1.06753	1.00183	0.986925	1.04579
	23.49	1.10273	1.11539	1.29349	1.11128	1.10356	1.11193	1.00011	1.02977	1.12894	1.21548	1.09865	1.01192	1.01137	1.09908	1.03145	1.00691	1.25148	1.11194	1.11134	1.18069	1.22832	1.1729	1.16686	1.22268	1.09259	1.12152	1.20609	1.25004	1.06106	1.29182	1.02619	1.03314	1.14712	1.30116	1.12195	1.21334	1.03613	1.1213	1.07273	1.07723	1.10562	1.01142	1.06591	1.00658	1.06747	1.00228	0.98653	1.04133
	23.99	1.10603	1.11509	1.29624	1.11144	1.10505	1.11325	0.998524	1.03078	1.12688	1.21569	1.10057	1.00896	1.01058	1.09355	1.02964	1.00706	1.24331	1.10363	1.11198	1.18363	1.22868	1.1715	1.16582	1.22571	1.09012	1.12428	1.20755	1.24447	1.05904	1.29216	1.02732	1.0337	1.14594	1.30642	1.12417	1.21159	1.04297	1.11535	1.06638	1.07568	1.10612	1.00886	1.06357	1.00223	1.06926	0.999454	0.982834	1.03733
	24.49	1.10707	1.11557	1.29352	1.11367	1.10683	1.11183	1.00073	1.0294	1.12485	1.21271	1.09678	1.0101	1.00985	1.09274	1.02787	1.00388	1.24403	1.10836	1.12033	1.18431	1.22618	1.17405	1.16319	1.22235	1.09021	1.12094	1.20696	1.23553	1.05806	1.28954	1.02668	1.03271	1.14516	1.30207	1.12224	1.2115	1.03768	1.11214	1.06425	1.0686	1.10534	1.00668	1.06427	0.99572	1.06367	1.00062	0.98595	1.03714
	24.99	1.10656	1.11754	1.29239	1.11062	1.10635	1.11249	0.996623	1.03135	1.11834	1.20646	1.08913	1.00878	1.00801	1.09106	1.0276	1.00711	1.2409	1.10789	1.11215	1.1803	1.22909	1.17459	1.16446	1.21898	1.08467	1.11672	1.20647	1.24336	1.05444	1.28771	1.02896	1.03332	1.14397	1.30721	1.11889	1.21037	1.0232	1.11322	1.06011	1.07067	1.10392	1.00471	1.06125	1.00159	1.06205	0.998968	0.983624	1.03743
	25.49	1.10466	1.11626	1.29453	1.11138	1.10488	1.10673	0.996242	1.03009	1.1158	1.20812	1.09211	1.00649	1.0113	1.08364	1.02289	1.00199	1.23753	1.11182	1.10921	1.18089	1.22885	1.17568	1.16594	1.21935	1.08638	1.11827	1.21585	1.23852	1.05417	1.28772	1.02541	1.03311	1.14293	1.30641	1.12602	1.20944	1.03958	1.10835	1.06057	1.07222	1.10311	1.00627	1.06473	0.999867	1.06527	1.00067	0.985576	1.03904
	25.99	1.10412	1.11332	1.29192	1.11467	1.10375	1.10745	0.99401	1.02949	1.11475	1.20394	1.0949	1.00605	1.01092	1.08364	1.02826	1.00493	1.22936	1.11039	1.10602	1.17844	1.22954	1.17112	1.16367	1.21928	1.08744	1.117	1.20556	1.23328	1.05979	1.28486	1.02446	1.03745	1.14516	1.30567	1.12249	1.20694	1.04005	1.11631	1.06175	1.07484	1.10327	1.00821	1.0656	1.00674	1.06468	1.00326	0.983541	1.03953
	26.49	1.10543	1.11024	1.29005	1.11576	1.10666	1.11126	1.00101	1.03127	1.11143	1.20201	1.08901	1.00544	1.0121	1.08421	1.03102	1.00617	1.23095	1.10673	1.11276	1.18206	1.22605	1.1766	1.16404	1.21694	1.08502	1.11464	1.2064	1.23206	1.05771	1.27794	1.02207	1.03687	1.14144	1.305	1.12164	1.20561	1.03165	1.10845	1.05787	1.07564	1.1015	1.00383	1.06009	1.00594	1.06094	1.00034	0.981516	1.03656
	26.99	1.10188	1.11283	1.29245	1.11314	1.10225	1.11007	0.995095	1.03148	1.10957	1.20016	1.08969	1.00327	1.01347	1.07371	1.02627	1.00398	1.23381	1.1038	1.1169	1.18049	1.22744	1.1763	1.1634	1.21629	1.08331	1.11716	1.21372	1.23257	1.05868	1.28095	1.02497	1.0374	1.14144	1.30506	1.12569	1.20463	1.03395	1.09475	1.05234	1.06763	1.09787	1.00233	1.06229	1.00608	1.0613	1.00248	0.984505	1.03774
	27.49	1.10169	1.10935	1.29004	1.11333	1.10458	1.10585	0.993544	1.03004	1.11456	1.2009	1.09363	1.00298	1.01673	1.06488	1.03314	0.997655	1.22417	1.09735	1.12332	1.18499	1.22518	1.17492	1.16193	1.2115	1.08532	1.11608	1.20628	1.22875	1.05223	1.27096	1.02104	1.03408	1.1373	1.30816	1.12214	1.20435	1.03233	1.0948	1.05579	1.06754	1.09134	1.0025	1.06299	1.00088	1.06204	1.00201	0.982106	1.03629
	27.99	1.09742	1.10649	1.29262	1.11258	1.10595	1.10526	0.998696	1.03344	1.10803	1.19597	1.09118	1.00183	1.01769	1.05512	1.029	1.00142	1.22496	1.10251	1.11664	1.17952	1.22544	1.17609	1.16438	1.21534	1.08771	1.11412	1.20992	1.22308	1.05184	1.27216	1.02013	1.03628	1.13882	1.30531	1.1264	1.20424	1.0305	1.09144	1.05328	1.06659	1.08797	0.998116	1.06032	1.00151	1.05907	1.00249	0.981357	1.03784
	28.49	1.10096	1.11176	1.29032	1.11458	1.1089	1.10595	0.994908	1.02907	1.11185	1.20002	1.0876	1.00135	1.01869	1.06076	1.03107	0.999455	1.23074	1.09746	1.11163	1.18123	1.22669	1.16966	1.16346	1.20977	1.08755	1.11148	1.20407	1.22488	1.05472	1.26788	1.01746	1.03644	1.13681	1.30609	1.12414	1.2014	1.03019	1.09399	1.05202	1.06822	1.09205	0.999396	1.06203	0.996685	1.05993	1.00145	0.980099	1.03829
	28.99	1.09289	1.10514	1.28786	1.11258	1.10549	1.10395	0.998	1.03291	1.10354	1.1948	1.0886	1.00149	1.02269	1.06117	1.03435	0.998015	1.21987	1.09919	1.10825	1.18144	1.22246	1.17034	1.16371	1.20927	1.08389	1.1117	1.20159	1.22194	1.0534	1.26845	1.01535	1.03906	1.13302	1.30426	1.12354	1.20273	1.0248	1.08785	1.05376	1.06748	1.09205	0.99721	1.06027	0.994541	1.05504	0.998513	0.976499	1.0369
	29.49	1.09485	1.10701	1.28904	1.11739	1.10364	1.10139	0.994844	1.03411	1.10316	1.19069	1.08526	1.00129	1.01901	1.05236	1.03604	1.00224	1.22071	1.09788	1.11123	1.17611	1.22517	1.17489	1.1639	1.21043	1.08514	1.11305	1.20469	1.2206	1.05323	1.26615	1.01996	1.04275	1.13625	1.30786	1.12669	1.20365	1.02909	1.08205	1.04686	1.07116	1.10032	0.989598	1.06022	0.993762	1.05929	0.999988	0.974526	1.03541
	29.99	1.0975	1.10567	1.28876	1.11797	1.10501	1.10729	0.996106	1.03178	1.11199	1.18945	1.08435	1.00495	1.01982	1.04726	1.02972	0.995103	1.21693	1.0937	1.10663	1.17686	1.21927	1.17696	1.16204	1.20367	1.08181	1.11128	1.20196	1.21654	1.0487	1.26862	1.01247	1.03762	1.13316	1.30597	1.12139	1.20133	1.05339	1.11204	1.06682	1.08974	1.1235	1.00659	1.0788	1.02154	1.07246	1.01596	0.990639	1.05285
	30.49	1.09652	1.10986	1.29296	1.11873	1.10448	1.10306	0.999115	1.0363	1.10013	1.18363	1.08126	0.997252	1.02041	1.04185	1.03214	1.00157	1.21684	1.09139	1.10682	1.17733	1.21932	1.17586	1.16177	1.20709	1.08346	1.11292	1.21196	1.212	1.05539	1.26387	1.01606	1.04146	1.1335	1.3074	1.12783	1.20008	1.00978	1.07684	1.03249	1.0569	1.0875	0.972293	1.04784	0.981658	1.04314	0.987626	0.960982	1.01999
	30.99	1.09592	1.1061	1.29208	1.11399	1.10434	1.10322	0.999591	1.03423	1.10467	1.18721	1.084	0.997587	1.02166	1.04384	1.03571	0.991654	1.2193	1.09459	1.10288	1.17618	1.21819	1.17859	1.15955	1.20925	1.08313	1.11552	1.2091	1.2026	1.05744	1.26379	1.01627	1.0385	1.13254	1.30401	1.12494	1.19889	1.02176	1.07448	1.0416	1.06705	1.0943	0.978873	1.05674	0.989081	1.04922	0.999179	0.9731	1.03369
	31.49	1.09146	1.10124	1.28844	1.11172	1.10276	1.10112	0.994986	1.03329	1.09256	1.18171	1.08052	0.998737	1.02451	1.03984	1.03795	0.991829	1.22191	1.09135	1.10476	1.17817	1.22525	1.17751	1.16111	1.20584	1.0829	1.11399	1.20448	1.20811	1.05648	1.26533	1.01069	1.04089	1.13443	1.30661	1.12505	1.19988	1.06119	1.11813	1.09472	1.12313	1.15647	1.02999	1.11742	1.0481	1.11145	1.05367	1.0252	1.08804
	31.99	1.09061	1.10098	1.29	1.11487	1.10393	1.10005	0.995842	1.03413	1.09071	1.17331	1.07722	0.998543	1.0217	1.03671	1.03699	0.988034	1.21461	1.08425	1.10615	1.18024	1.21687	1.17267	1.16051	1.20286	1.08022	1.11237	1.2051	1.20224	1.05224	1.26308	1.00973	1.0394	1.13	1.30684	1.12724	1.1972	1.02564	1.07411	1.0432	1.07172	1.09677	0.977571	1.06107	0.999334	1.05786	0.994037	0.970374	1.03186
	32.49	1.09201	1.10129	1.28813	1.11858	1.10689	1.0998	0.995121	1.03327	1.10351	1.17668	1.07809	0.994477	1.02152	1.03059	1.03037	0.989432	1.21532	1.0869	1.0983	1.17592	1.21638	1.18029	1.15935	1.19756	1.08009	1.11045	1.19536	1.19958	1.05197	1.25913	1.00911	1.04101	1.12811	1.30545	1.12564	1.19391	0.996366	1.07361	1.04656	1.06803	1.09878	0.975903	1.06343	1.00004	1.05368	0.996243	0.971583	1.03448
	32.99	1.08874	1.09331	1.2884	1.11334	1.10265	1.09785	0.998301	1.03715	1.09505	1.18021	1.0804	0.997612	1.02454	1.02952	1.0337	0.992957	1.20657	1.08222	1.09234	1.18092	1.2164	1.18197	1.15881	1.20102	1.08046	1.11007	1.20142	1.19966	1.0482	1.25793	1.01248	1.03692	1.12695	1.30355	1.12763	1.19751	0.962688	1.0263	1.0066	1.03351	1.06125	0.940437	1.029	0.965462	1.02018	0.965584	0.939309	0.998021
	33.49	1.09376	1.09276	1.29066	1.11437	1.10128	1.09925	0.99756	1.0371	1.09375	1.17625	1.07945	0.994934	1.02689	1.01754	1.03193	0.990086	1.19887	1.07971	1.10402	1.17474	1.21333	1.17643	1.15917	1.19387	1.07875	1.10573	1.19799	1.19671	1.04612	1.25679	1.01616	1.04478	1.12671	1.29925	1.12867	1.19525	1.00433	1.06405	1.03621	1.06146	1.09348	0.970517	1.05679	0.993694	1.05113	0.996429	0.970448	1.02963
	33.99	1.09278	1.09658	1.29051	1.11602	1.10292	1.09965	0.997087	1.03633	1.09621	1.16979	1.08302	0.993254	1.02856	1.01735	1.02946	0.992547	1.19886	1.07847	1.09953	1.17362	1.21477	1.18178	1.1585	1.1991	1.0764	1.11173	1.19651	1.19008	1.04528	1.25427	1.01074	1.04014	1.12805	1.29972	1.13033	1.19528	1.01079	1.03777	1.02551	1.05033	1.08163	0.957366	1.04972	0.992775	1.04332	0.99108	0.956659	1.02096
	34.49	1.08805	1.09225	1.28726	1.11293	1.10625	1.09585	1.0001	1.03748	1.10222	1.17497	1.08788	0.995554	1.02772	1.01015	1.03273	0.993085	1.19406	1.07547	1.10291	1.17468	1.21167	1.18206	1.15623	1.19547	1.07669	1.11004	1.19553	1.18438	1.04493	1.25223	1.01322	1.039	1.12448	1.30088	1.1308	1.19515	1.02091	1.04349	1.03525	1.06245	1.09144	0.969112	1.05843	0.990188	1.04842	0.99508	0.966776	1.03323
	34.99	1.08196	1.09361	1.28474	1.11793	1.10029	1.09666	1.00114	1.03863	1.09259	1.16482	1.088	0.993363	1.02875	1.01731	1.03239	0.989524	1.19177	1.07702	1.09631	1.17091	1.21127	1.17988	1.15579	1.19745	1.07981	1.11224	1.19952	1.18848	1.04786	1.25639	1.01125	1.03783	1.12304	1.29934	1.12972	1.19418	1.0102	1.02304	1.02146	1.04705	1.07662	0.956375	1.0488	0.975877	1.04135	0.993941	0.955852	1.02128
	35.49	1.0884	1.08983	1.28436	1.11789	1.10479	1.09767	0.997122	1.03701	1.0914	1.17199	1.08403	0.993582	1.03118	1.01593	1.03203	0.991562	1.19373	1.07471	1.09804	1.17219	1.20946	1.1799	1.15676	1.19275	1.07456	1.10618	1.19228	1.18326	1.04684	1.25879	1.01235	1.04003	1.1227	1.29729	1.13241	1.19186	0.979333	1.00054	0.99784	1.02998	1.06016	0.932655	1.02668	0.956301	1.01602	0.967164	0.93497	0.998055
	35.99	1.08698	1.09455	1.28596	1.11678	1.10058	1.09954	1.00115	1.04121	1.10295	1.17742	1.09372	0.994642	1.03382	1.00286	1.02876	0.985191	1.1875	1.07214	1.09351	1.16856	1.20703	1.17502	1.15513	1.19043	1.07492	1.10411	1.19258	1.18279	1.04239	1.24758	1.01154	1.04198	1.12091	1.29465	1.12866	1.19054	1.01185	1.04329	1.02879	1.05798	1.09277	0.965064	1.05764	0.99429	1.04569	0.99622	0.963068	1.03027
	36.49	1.08341	1.09006	1.28511	1.11808	1.09724	1.09549	0.998158	1.03424	1.09147	1.16971	1.08624	0.995032	1.03261	1.00678	1.03966	0.985844	1.18446	1.07331	1.09313	1.1716	1.20742	1.17597	1.15424	1.19286	1.07472	1.1033	1.19213	1.17991	1.04283	1.24914	1.01392	1.03729	1.12155	1.29774	1.12762	1.19102	1.01337	1.0383	1.02789	1.05296	1.08815	0.963509	1.05509	0.997307	1.04503	0.995132	0.965087	1.03207
	36.99	1.08654	1.09359	1.29053	1.11853	1.10252	1.0934	1.00067	1.03892	1.0956	1.16506	1.08862	0.991548	1.03601	1.01348	1.03364	0.991767	1.18988	1.07334	1.09834	1.1678	1.21113	1.17464	1.15258	1.18684	1.07487	1.107	1.19054	1.17891	1.04202	1.24489	1.01158	1.04332	1.11718	1.29311	1.12993	1.19193	1.01977	1.03955	1.03018	1.05434	1.08643	0.963448	1.05781	0.995672	1.04437	0.994217	0.965575	1.03308
	37.49	1.08148	1.08756	1.28063	1.11362	1.0957	1.09411	0.997813	1.03901	1.09026	1.16732	1.0862	0.992675	1.0364	0.992649	1.03188	0.97894	1.1855	1.07133	1.09326	1.16813	1.20156	1.17548	1.1523	1.18804	1.07282	1.10527	1.19403	1.1823	1.04272	1.24268	1.01029	1.03926	1.1184	1.29707	1.13122	1.19137	1.01687	1.02803	1.02105	1.0524	1.08561	0.961963	1.05432	0.995636	1.04195	0.99622	0.963535	1.0301
	37.99	1.08637	1.0891	1.28645	1.11486	1.09852	1.09603	0.998184	1.03768	1.08959	1.15964	1.08226	0.989943	1.03613	0.992431	1.03054	0.982343	1.18046	1.06928	1.09611	1.16585	1.20584	1.1742	1.15101	1.18661	1.07142	1.10444	1.19305	1.18847	1.04031	1.2418	1.01152	1.03827	1.12181	1.29421	1.13074	1.19157	1.01454	1.02921	1.02428	1.05367	1.08449	0.96097	1.05764	1.00223	1.0418	0.995658	0.962845	1.02731
	38.49	1.08815	1.09226	1.28823	1.11879	1.09831	1.09849	0.998297	1.0389	1.08302	1.15916	1.08421	0.989283	1.0391	0.991004	1.02675	0.981353	1.18571	1.06796	1.09339	1.16883	1.20515	1.17676	1.14842	1.19033	1.07393	1.10675	1.19198	1.17586	1.04434	1.24224	1.0072	1.04014	1.12131	1.29393	1.12972	1.19044	1.02496	1.02944	1.02954	1.06054	1.08744	0.959901	1.05761	1.0028	1.04001	0.998546	0.961979	1.03039
	38.99	1.09279	1.08884	1.28722	1.11977	1.0975	1.09486	1.00129	1.03892	1.09333	1.16374	1.08452	0.989517	1.03885	0.983872	1.02795	0.98353	1.17544	1.06089	1.09053	1.166	1.20963	1.1752	1.14987	1.18843	1.07434	1.10537	1.18303	1.17735	1.04645	1.24633	1.01136	1.04269	1.12106	1.29333	1.13198	1.18683	1.00247	1.0276	1.028	1.06088	1.08695	0.957033	1.05834	0.99696	1.03938	0.997554	0.964378	1.03083
	39.49	1.08661	1.0903	1.28858	1.1174	1.1002	1.09814	0.999495	1.03929	1.09163	1.15986	1.07958	0.989585	1.04332	0.995191	1.03017	0.990035	1.17584	1.06478	1.09425	1.16714	1.20937	1.17581	1.14851	1.18617	1.07239	1.10174	1.18474	1.17699	1.03894	1.24127	1.01244	1.04454	1.11952	1.29063	1.13161	1.19058	1.02308	1.02742	1.02572	1.05894	1.08632	0.961398	1.06002	0.997688	1.04024	0.996579	0.961555	1.03154
	39.99	1.08967	1.08568	1.28793	1.11752	1.09827	1.0944	1	1.04027	1.09036	1.1608	1.08305	0.990169	1.04155	0.988218	1.03031	0.981538	1.17688	1.06635	1.09309	1.16947	1.20432	1.17649	1.14806	1.1854	1.07048	1.10557	1.18738	1.17205	1.03846	1.24034	1.01217	1.04205	1.11821	1.28882	1.13539	1.18997	1.02035	1.02824	1.02957	1.05526	1.08657	0.961515	1.06111	0.998777	1.04274	0.994489	0.960358	1.03061
	40.49	1.08338	1.08331	1.28098	1.119	1.0962	1.09737	0.996437	1.03785	1.07472	1.15414	1.07743	0.988452	1.04297	0.977957	1.02948	0.979968	1.17958	1.06381	1.08861	1.16288	1.20602	1.17817	1.14678	1.18961	1.07211	1.10118	1.18469	1.16703	1.04236	1.23962	1.00984	1.04271	1.1193	1.29217	1.13217	1.18797	1.02282	1.01551	1.02541	1.05099	1.08896	0.955775	1.05784	0.992412	1.0395	0.998312	0.959779	1.02793
	40.99	1.0815	1.08267	1.28276	1.11722	1.09789	1.09345	1.00104	1.0396	1.08366	1.1546	1.08518	0.991579	1.04272	0.976637	1.03112	0.976057	1.17578	1.06498	1.09467	1.16523	1.20625	1.17588	1.14583	1.18477	1.07441	1.1033	1.18317	1.16926	1.04275	1.2371	1.00916	1.04291	1.11437	1.28842	1.13524	1.1904	1.0128	1.02323	1.02314	1.05378	1.08442	0.953014	1.05915	0.992796	1.03873	0.99613	0.958208	1.0279
	41.49	1.08969	1.08552	1.28623	1.12304	1.09642	1.09339	0.998975	1.04105	1.08112	1.15368	1.07742	0.991292	1.0437	0.976775	1.02902	0.981758	1.17614	1.06215	1.08893	1.1616	1.2037	1.17632	1.14596	1.17922	1.07142	1.10163	1.1812	1.17317	1.04009	1.23701	1.01279	1.04493	1.1115	1.29075	1.13538	1.18916	1.02149	1.01622	1.01781	1.0521	1.08238	0.949825	1.05943	1.00073	1.03774	0.990378	0.95312	1.02809
	41.99	1.08546	1.08468	1.28505	1.12253	1.09605	1.09547	1.00027	1.04057	1.07891	1.15382	1.07965	0.989161	1.04797	0.972205	1.03051	0.97966	1.17602	1.0632	1.09646	1.16126	1.2044	1.17883	1.14545	1.18331	1.07346	1.09907	1.18245	1.17182	1.03807	1.23275	1.00989	1.049	1.11019	1.28902	1.13808	1.18902	1.02566	1.01624	1.02201	1.05517	1.08364	0.950635	1.06291	1.00612	1.04018	0.992368	0.956326	1.03036
	MAX	1.11188	1.1207	1.31207	1.12304	1.1089	1.1234	1.02423	1.04121	1.15627	1.251	1.1022	1.02145	1.04797	1.18943	1.03966	1.0156	1.29899	1.13453	1.12414	1.18683	1.23673	1.18431	1.16686	1.23909	1.10156	1.12607	1.21585	1.32169	1.07551	1.35463	1.05873	1.049	1.16082	1.30816	1.13808	1.2391	1.07059	1.16135	1.12005	1.12313	1.15647	1.05392	1.11742	1.0481	1.11145	1.05367	1.03389	1.08804


















[truncated: 46 more columns]

## Sheet: Figure 3 - Supplement 3
		pmEKAR4 only (control)																									pmEKAR4 + GGTI preincubation
	Time (min)	Cell 1	Cell 2	Cell 3	Cell 4	Cell 5	Cell 6	Cell 7	Cell 8	Cell 9	Cell 10	Cell 11	Cell 12	Cell 13	Cell 14	Cell 15	Cell 16	Cell 17	Cell 18	Cell 19	Cell 20	AVERAGE	SEM			Cell 1	Cell 2	Cell 3	Cell 4	Cell 5	Cell 6	Cell 7	Cell 8	Cell 9	Cell 10	Cell 11	Cell 12	Cell 13	Cell 14	Cell 15	Cell 16	Cell 17	Cell 18	Cell 19	Cell 20	Cell 21	Cell 22	Cell 23	Cell 24
	-5.3095	1.00688	1.01736	0.988705	0.987279	0.996956	0.97992	1.02362	0.999275	0.97894	1.00167	1.03121	0.988272	1.04053	0.98499	0.981533	0.967019	0.997555	0.992466	1.02011	1.0126	0.999845	0.00431944			1.00828	0.999366	0.995054	0.995017	0.987269	0.960035	1.00911	0.997331	0.993932								0.989922	0.998711	0.940159	0.986695	0.994574	1.00097	0.984263	1.00601
	-4.8095	1.01311	1.01481	0.988367	0.990102	0.997984	0.97761	1.01939	0.998306	0.976073	1.00786	1.0264	0.990186	1.04466	0.988054	0.986492	0.968593	0.997588	0.987851	1.01354	1.01392	1.00004	0.0042216			1.02303	0.997078	0.99552	0.998806	0.984229	0.965031	1.00441	0.996578	0.995585	1.00624	1.01029	0.994189	1.03008	1.00127	1.02075	1.00359	0.993252	0.99724	0.944995	0.987761	0.996194	0.999748	0.984899	1.00784
	-4.3095	1.01571	1.01707	0.990948	0.990631	0.995425	0.979654	1.0191	0.998381	0.967628	1.00309	1.02241	0.985763	1.04949	0.985459	0.986757	0.976803	0.993279	0.987611	1.01515	1.01351	0.999694	0.00436964			1.02112	0.998145	0.993481	1.00198	0.986474	0.972526	1.00593	1.00113	0.997598	1.01381	1.00736	0.994729	1.02854	1.00062	1.01555	1.00185	0.99374	0.996659	0.947099	0.990912	0.993396	0.999927	0.983987	1.00468
	-3.8095	1.00625	1.00983	0.989984	0.99151	0.997651	0.982846	1.01613	0.999072	0.976032	1.01139	1.01918	0.986348	1.0482	0.986074	0.987562	0.976293	0.991483	0.992879	1.01527	1.01234	0.999816	0.00392998			1.01171	0.995763	0.997022	0.999805	0.988477	0.973874	1.009	0.997138	0.996599	1.00526	1.00973	0.997105	1.02477	1.00088	1.01184	1.00143	0.989185	0.993732	0.946468	0.990103	0.993652	0.999025	0.983872	1.0059
	-3.3095	0.998019	1.0074	0.991566	0.990191	0.99619	0.98399	1.01198	0.998333	0.977005	1.01153	1.0213	0.998935	1.03962	0.988528	0.991331	0.975882	0.996119	0.990072	1.01142	1.00918	0.99943	0.00341812			1.01053	0.999018	0.995559	0.999639	0.991554	0.964826	1.01111	0.996843	0.996136	1.00474	1.00639	0.999571	1.04026	1.00059	1.01002	1.00728	0.986546	0.995601	0.937623	0.989628	0.994513	0.997771	0.984928	1.00835
	-2.8095	1.01076	1.01085	0.992174	0.993842	0.998681	0.986193	1.01109	0.999621	0.984275	1.01212	1.01812	0.987774	1.04154	0.988745	0.990082	0.982512	0.996359	0.991732	1.01201	1.01262	1.00105	0.0033003			1.00818	0.99938	0.999404	1.00406	0.995141	0.97504	1.00833	1.00432	0.999233	1.00647	1.00608	0.996296	1.04006	1.00176	1.00469	1.00697	0.989754	0.99251	0.952486	0.993945	0.993975	0.998807	0.987112	1.00893
	-2.3095	1.00884	1.00274	0.996018	0.993535	0.995879	0.989951	1.00836	0.997783	0.97907	1.01009	1.0224	0.988585	1.04243	0.991391	0.994296	0.983733	0.991972	0.994009	1.00867	1.01224	1.0006	0.00324352			1.01882	0.999141	0.999481	1.00219	0.996319	0.96728	1.01139	0.99884	0.999182	1.00554	1.00747	0.996919	1.03983	1.00062	1.0053	1.00733	0.994781	0.994275	0.954529	0.996285	0.995475	0.999784	0.989417	1.00667
	-1.8095	1.01469	1.00703	0.995761	0.995793	0.998085	0.990844	1.00778	0.997963	0.971105	1.01494	1.01527	0.981062	1.04333	0.99327	0.990304	0.988822	0.993811	0.990582	1.01338	1.01037	1.00071	0.0034976			1.01891	1.00198	0.996148	1.00247	0.998057	0.973129	1.01	1.0014	1.00026	1.0019	1.00154	0.997191	1.04022	1.0002	0.999775	1.00711	0.992054	0.99535	0.951922	0.996965	0.996327	0.999436	0.990952	1.00615
	-1.3095	1.00692	1.00854	0.998951	0.997401	1.00037	0.992891	1.00504	0.99841	0.981532	1.01421	1.02092	0.981644	1.04407	0.994952	0.995333	0.991278	0.987719	0.99327	1.00436	1.00889	1.00133	0.00318252			1.01148	1.00158	0.995252	1.0008	1.00016	0.97664	1.01037	0.996921	0.999151	1.00803	1.00127	0.998342	1.04323	1.00083	0.999561	1.00755	0.994316	0.990708	0.957247	0.997511	0.997241	1.00076	0.988811	1.00214
	-0.8095	1.00321	1.01066	0.998664	0.998071	0.997974	0.995519	1.00307	0.999995	0.984625	1.01038	1.01405	0.984966	1.0533	0.996985	0.995301	0.993147	0.976637	0.991235	1.01196	1.01052	1.00151	0.00350948					0.998706	1.00158	1.00485	0.97843	1.01138	0.999818	0.999127	0.994706	1.00131	0.997469	1.04193	1.00008	0.99861	1.00428	0.997882	0.996112	0.96021	0.999488	0.999439	0.999429	0.993434	1.00738
EGF Addition	0	1	1	1	1	1	1	1	1	1	1	1	1	1	1	1	1	1	1	1	1	1	0		EGF Addition	1	1	1	1	1	1	1	1	1	1	1	1	1	1	1	1	1	1	1	1	1	1	1	1
	0.475417	1.00205	0.993802	0.996348	0.993641	0.995371	0.996299	0.992245	0.994204	0.988936	1.00591	0.998273	0.976063	1.0488	0.983855	0.9941	0.994955	0.997702	0.999221	0.993453	0.992791	0.996901	0.0030651			1.00328	0.994553	0.988634	1.00246	1.009	0.970263	1.01499	0.993057	0.997029	0.997542	1.00195	0.996671	1.03337	0.996994	0.994626	0.996119	0.992489	0.99223	0.958014	0.998134	0.998237	0.996188	0.994549	0.99889
	0.975417	1.01516	1.00463	0.999698	0.995809	0.99563	1.00307	0.990566	0.99737	0.979503	1.00432	0.997565	0.988016	1.02639	0.986369	0.994371	0.9962	1.00485	0.996159	0.988944	0.990706	0.997766	0.00232654			0.992947	0.995877	0.987889	1.00478	1.01023	0.978255	1.016	0.99361	0.997448	1.00263	0.997176	0.994367	1.03022	0.995377	1.00182	1.0051	0.991591	0.993368	0.963931	0.999924	0.999139	0.997486	1.00252	1.00059
	1.47542	0.992908	0.991471	0.996767	0.990812	0.994173	1.00099	0.986011	0.99576	0.987876	1.01793	1.00996	0.999134	1.04925	0.984596	0.987424	0.988351	1.00143	0.994338	0.992266	0.987655	0.997456	0.00328826			1.00018	0.995734	0.987964	1.00471	1.00814	0.979718	1.0153	0.992042	0.997974	1.00461	0.98703	0.986895	1.02458	0.992004	0.999849	1.00692	0.990028	0.989425	0.955024	0.998428	0.993724	0.995937	1.00423	0.999189
	1.97542	0.995457	1.00361	0.999109	0.990702	0.994193	1.00509	0.986528	0.998085	0.996912	1.00045	1.01128	0.993201	1.06185	0.995673	0.987711	0.997893	0.996127	0.9988	0.998828	0.990599	1.0001	0.00349967			0.996717	0.99821	0.986256	0.99906	1.00573	0.985302	1.01345	0.990005	0.996841	0.996345	0.988905	0.984411	1.02433	0.991907	0.996691	1.01099	0.985074	0.982452	0.951526	0.998176	0.989123	0.992377	1.00282	0.996151
	2.47542	1.01573	1.02201	0.996452	0.991069	0.995416	1.00744	0.983743	0.996596	1.02415	1.02234	1.02127	1.00331	1.11844	1.01565	0.990203	1.00036	0.993418	0.995233	1.02413	0.993386	1.01052	0.00640145			0.993127	0.995331	0.986731	0.999364	1.00743	0.980535	1.01242	0.990801	0.995717	0.986793	0.985499	0.983264	1.02548	0.991318	0.994916	1.01568	0.982705	0.979209	0.952119	0.993517	0.98708	0.989221	1.00051	0.993149
	2.97542	1.03677	1.05551	0.997659	0.997294	0.998102	1.00994	0.980599	0.997074	1.03582	1.04489	1.02765	1.01198	1.1564	1.06298	0.996742	1.01747	1.01526	0.997513	1.05345	1.00447	1.02488	0.00867833			0.996041	0.998721	0.984243	1.00427	1.01355	0.979556	1.0132	0.9926	0.997773	0.991431	0.986205	0.977315	1.02072	0.990503	0.992994	1.01271	0.984074	0.976846	0.941318	0.988751	0.985875	0.985699	1.00017	0.991552
	3.47542	1.06058	1.08308	0.999067	0.999925	1.00229	1.01531	0.977781	1.00035	1.07835	1.07151	1.04353	1.03027	1.174	1.12874	1.0027	1.04118	1.03697	1.00395	1.09504	1.01662	1.04306	0.0111834			1.00244	1.0009	0.986294	1.00611	1.00655	0.973885	1.01281	0.988092	0.997136	0.986574	0.981642	0.97623	1.01848	0.988478	0.989958	1.01269	0.991773	0.973772	0.947809	0.989608	0.987707	0.984227	0.996833	0.988042
	3.97542	1.06469	1.09665	1.00757	1.01153	1.0106	1.02103	0.977238	1.00506	1.10838	1.0815	1.0614	1.04437	1.18526	1.18893	1.01014	1.06598	1.07245	1.00834	1.11575	1.03179	1.05843	0.0130639			1.01767	1.00096	0.991569	1.00711	1.01098	0.978897	1.01205	0.9882	1.00093	0.98283	0.984583	0.974401	1.01738	0.986229	0.987058	1.0077	0.993264	0.970465	0.936711	0.987469	0.983276	0.984411	1.00176	0.989921
	4.47542	1.08686	1.10347	1.0167	1.02355	1.0204	1.02749	0.9754	1.0111	1.12392	1.08209	1.08069	1.05397	1.19488	1.23716	1.0202	1.08454	1.08758	1.0115	1.13743	1.04783	1.07134	0.0146429			1.02885	1.0036	0.984766	0.998402	1.00707	0.962167	1.00625	0.989342	0.997555	0.975492	0.978043	0.970668	1.01361	0.987863	0.983781	1.0018	0.993505	0.975168	0.930805	0.985219	0.983224	0.983968	1.00562	0.992726
	4.97542	1.08433	1.10444	1.02462	1.039	1.03308	1.03962	0.974464	1.01854	1.15293	1.07919	1.09143	1.06377	1.19426	1.26247	1.03048	1.1056	1.11024	1.01334	1.14897	1.06996	1.08204	0.0153396			1.04161	1.00743	0.985566	1.00894	1.01147	0.957611	1.00406	0.988012	1.00059	0.978561	0.982665	0.97075	1.01513	0.985571	0.983166	0.994754	0.996482	0.98281	0.935263	0.984714	0.982227	0.987918	1.00775	0.995064
	5.47542	1.09536	1.10182	1.03654	1.05269	1.04306	1.05156	0.974008	1.02614	1.14399	1.07908	1.10019	1.06839	1.20582	1.27495	1.03956	1.12223	1.12198	1.01663	1.15831	1.08984	1.09011	0.0155184			1.09963	1.01398	0.988331	1.00465	1.00904	0.960734	1.00506	0.98625	1.00846	0.976935	0.985447	0.970164	1.01371	0.985719	0.979131	0.99192	0.995094	0.98864	0.939371	0.987994	0.982403	0.990918	1.00848	0.999864
	5.97542	1.08249	1.10549	1.05199	1.06987	1.05871	1.0675	0.973671	1.03964	1.15461	1.08202	1.11235	1.0755	1.20356	1.28138	1.05032	1.13302	1.12563	1.01643	1.16804	1.10252	1.09774	0.015332			1.08165	1.01879	0.987611	1.0045	1.01552	0.955109	1.00232	0.988239	1.00672	0.97846	0.987088	0.970243	1.01667	0.98592	0.978856	0.989924	0.997564	1.00262	0.943558	0.986553	0.985073	0.99704	1.01048	1.0013
	6.47542	1.09518	1.10215	1.06996	1.08262	1.07225	1.08184	0.975188	1.04996	1.16269	1.07989	1.11905	1.08044	1.22761	1.28638	1.06212	1.14543	1.1305	1.0185	1.17792	1.12299	1.10713	0.0156581			1.0701	1.02327	0.984147	1.00511	1.01368	0.957726	1.0088	0.9906	1.00668	0.981156	0.989391	0.968893	1.01501	0.985895	0.979162	0.988621	1.00156	1.01703	0.939077	0.993605	0.983207	1.00378	1.00827	1.01733
	6.97542	1.098	1.10133	1.08609	1.09765	1.08153	1.09183	0.974566	1.05959	1.14722	1.07967	1.12806	1.0875	1.22586	1.28866	1.06492	1.14916	1.12644	1.02059	1.18288	1.14082	1.11162	0.0153459			1.06507	1.02976	0.980752	1.00961	1.02499	0.958636	1.00957	0.990764	1.00864	0.984644	0.996603	0.971027	1.01526	0.987479	0.980372	0.989671	0.998791	1.04161	0.945897	0.99925	0.985008	1.0147	1.01426	1.02702
	7.47542	1.09726	1.09891	1.09424	1.10449	1.09076	1.1064	0.972717	1.07329	1.14112	1.07594	1.1313	1.08363	1.2286	1.29205	1.07111	1.15163	1.13623	1.02241	1.18922	1.14876	1.1155	0.0154241			1.07193	1.03928	0.981223	1.00761	1.02908	0.956365	1.00685	0.987483	1.00998	0.993251	1.0091	0.977346	1.01692	0.991205	0.982548	0.987984	1.00266	1.06399	0.949511	1.01373	0.984935	1.02985	1.01969	1.04707
	7.97542	1.07961	1.09821	1.10203	1.10807	1.09708	1.11489	0.972898	1.08492	1.14842	1.07923	1.13445	1.08738	1.22905	1.29364	1.07424	1.15399	1.13281	1.02315	1.19078	1.16026	1.11826	0.0154867			1.06685	1.04551	0.985345	1.0144	1.03034	0.958043	1.00866	0.99281	1.01275	0.989011	1.00829	0.972549	1.01242	0.988496	0.981243	0.987087	0.999879	1.08352	0.952015	1.02834	0.987535	1.04526	1.02596	1.06259
	8.47542	1.08978	1.0956	1.11328	1.11278	1.10325	1.12498	0.973079	1.09679	1.15513	1.07689	1.14182	1.09013	1.2391	1.29109	1.08074	1.14911	1.14251	1.02445	1.1941	1.1685	1.12316	0.0155278			1.07085	1.05243	0.989782	1.019	1.0429	0.962496	1.01187	0.992579	1.01774	0.992989	1.02166	0.977294	1.01429	0.992608	0.989532	0.983257	1.00465	1.10046	0.968582	1.04975	0.991587	1.0633	1.03492	1.07782
	8.97542	1.07555	1.09388	1.12066	1.11466	1.1072	1.13455	0.971465	1.10674	1.15848	1.07339	1.13583	1.0918	1.23039	1.29618	1.0822	1.14888	1.12602	1.02817	1.19632	1.17545	1.12339	0.0156125			1.07896	1.05943	0.982677	1.01693	1.04259	0.957426	0.992724	0.991563	1.01529	0.993563	1.01925	0.976337	1.01401	0.993003	0.985275	0.983435	1.00251	1.12069	0.974165	1.06727	0.993753	1.08014	1.04262	1.09412
	9.47542	1.08272	1.09908	1.12762	1.11801	1.11217	1.14471	0.971661	1.1191	1.16308	1.07236	1.1421	1.09075	1.22119	1.28796	1.08052	1.13836	1.1696	1.02142	1.20819	1.17014	1.12704	0.0155477			1.0759	1.06465	0.98585	1.02269	1.04703	0.958944	0.994523	0.990151	1.01747	1.0004	1.02623	0.977566	1.01047	0.99471	0.987845	0.98367	1.00375	1.13598	0.982648	1.08476	0.997356	1.09553	1.04663	1.10757
	9.97542	1.07185	1.10437	1.12693	1.11832	1.11423	1.14877	0.970204	1.12919	1.15525	1.07237	1.14322	1.0931	1.21502	1.28613	1.08448	1.14091	1.14034	1.02461	1.19885	1.18435	1.12613	0.0152368			1.07811	1.07074	0.990826	1.03098	1.05735	0.970531	1.01798	0.993463	1.02625	1.00099	1.03046	0.97807	1.01156	0.998307	0.985124	0.988216	1.00283	1.14492	0.980389	1.09955	1.00145	1.11265	1.05168	1.11573
	10.4754	1.08665	1.09979	1.13413	1.11773	1.11789	1.15679	0.968991	1.13699	1.16877	1.06853	1.1436	1.08969	1.22688	1.28184	1.08387	1.14081	1.09464	1.03129	1.1798	1.19291	1.12608	0.0152779			1.08232	1.07648	0.996484	1.02834	1.05585	0.981048	1.03594	0.996114	1.03157	1.00769	1.03727	0.979986	1.01703	0.999899	0.984534	0.987054	1.00396	1.15515	0.985823	1.11422	1.00472	1.12501	1.05679	1.12971
	10.9754	1.07971	1.10247	1.13579	1.1191	1.12077	1.16116	0.969512	1.14515	1.15697	1.0726	1.13801	1.09671	1.22939	1.28639	1.08271	1.13841	1.11638	1.02981	1.19243	1.18979	1.12816	0.0153853			1.07286	1.07862	0.989805	1.03166	1.05922	0.998806	1.05854	0.994048	1.03544	1.00825	1.0344	0.979748	1.01034	1.00283	0.978306	0.986114	1.00382	1.15681	0.991681	1.12357	1.00872	1.13513	1.06324	1.13847
	11.4754	1.0861	1.09723	1.13857	1.12149	1.12033	1.16238	0.969964	1.15484	1.16346	1.0744	1.13726	1.09595	1.22582	1.28411	1.08288	1.14417	1.12681	1.02828	1.20293	1.19257	1.13048	0.0154647			1.07191	1.08148	0.99381	1.02749	1.06255	1.00322	1.07608	0.994048	1.03882	1.0186	1.03997	0.98341	1.01324	1.00572	0.980098	0.986345	1.0065	1.1561	0.993494	1.12851	1.01276	1.14544	1.06679	1.14091
	11.9754	1.08126	1.09285	1.13724	1.11556	1.12166	1.16621	0.967925	1.15828	1.16332	1.06866	1.13468	1.08855	1.21978	1.28787	1.08317	1.1416	1.1191	1.03109	1.19937	1.19561	1.12869	0.0156755			1.08297	1.08444	0.99439	1.03348	1.08005	1.00886	1.07576	0.996409	1.04454	1.02029	1.04062	0.981471	1.01154	1.00661	0.97892	0.985842	1.01515	1.16502	0.995178	1.13996	1.01821	1.15537	1.06618	1.14948
	12.4754	1.08628	1.09619	1.13651	1.11584	1.12268	1.17059	0.965846	1.16703	1.17391	1.06843	1.13027	1.08364	1.21374	1.28523	1.08041	1.13862	1.12191	1.02995	1.1975	1.19566	1.12901	0.0157071			1.06759	1.08617	0.971869	1.02402	1.04959	1.00374	1.08222	0.986354	1.03394	1.0217	1.0452	0.985151	1.01176	1.01229	0.986212	0.989037	1.01279	1.16913	0.995008	1.14013	1.02181	1.16154	1.06862	1.14979
	12.9754	1.09093	1.09812	1.1398	1.11255	1.12234	1.1731	0.966053	1.17119	1.16986	1.06408	1.13675	1.08303	1.21232	1.28756	1.07824	1.14064	1.12298	1.0333	1.1963	1.19448	1.12968	0.015725			1.0713	1.08597	0.989127	1.03103	1.06261	1.00932	1.08622	0.991013	1.04082	1.02552	1.04443	0.985921	1.00886	1.01326	0.983678	0.987353	1.01397	1.16815	1.00201	1.1441	1.027	1.16484	1.07127	1.15211
	13.4754	1.07906	1.10602	1.13957	1.11322	1.1268	1.17728	0.965036	1.17442	1.18389	1.06187	1.13963	1.08542	1.20661	1.28468	1.08022	1.13856	1.11968	1.0311	1.19116	1.19452	1.12994	0.0157897			1.07104	1.08824	0.971383	1.02296	1.05529	1.0044	1.08073	0.985967	1.035	1.02818	1.0447	0.986567	1.01388	1.01744	0.990068	0.989339	1.01314	1.16538	0.994254	1.14653	1.03226	1.17184	1.07186	1.15283
	13.9754	1.09257	1.10488	1.13987	1.11302	1.12437	1.18058	0.963813	1.1773	1.17814	1.06524	1.1388	1.08235	1.20718	1.28215	1.07687	1.14038	1.12029	1.03234	1.19488	1.19471	1.13049	0.0157096			1.06831	1.08859	0.977904	1.031	1.06572	1.01195	1.09109	0.988595	1.0404	1.04095	1.05888	0.982356	1.01426	1.0188	1.00078	0.992137	1.01573	1.16825	1.00259	1.15486	1.03789	1.17539	1.07594	1.15672
	14.4754	1.0823	1.09976	1.14216	1.11093	1.1258	1.18445	0.963812	1.1797	1.17402	1.06244	1.13034	1.08163	1.19242	1.28541	1.07868	1.1391	1.11738	1.03094	1.19172	1.19644	1.12847	0.0157722			1.06038	1.08789	0.98165	1.03215	1.06566	1.0138	1.08719	0.991658	1.04005	1.02859	1.04523	0.987081	1.01534	1.01991	1.00171	0.9921	1.01807	1.17263	1.01004	1.15053	1.04485	1.17789	1.08045	1.15875
	14.9754	1.07706	1.105	1.13793	1.10831	1.12512	1.18385	0.962545	1.18102	1.18391	1.06814	1.12521	1.0793	1.20383	1.28972	1.07668	1.13519	1.11007	1.03292	1.18944	1.19681	1.1286	0.0160972			1.06997	1.08704	0.980067	1.03213	1.0531	1.01024	1.08802	0.988093	1.03858	1.0349	1.05022	0.98754	1.01415	1.0217	0.999911	0.99394	1.01757	1.16548	1.00542	1.14906	1.0492	1.18136	1.08402	1.16258
	15.4754	1.0948	1.1027	1.13902	1.10724	1.12698	1.18491	0.960728	1.18335	1.18687	1.06884	1.122	1.07652	1.19376	1.28549	1.07561	1.13385	1.10611	1.03235	1.18434	1.19152	1.12785	0.015809			1.05902	1.0873	0.971406	1.02594	1.04073	1.01171	1.08177	0.985583	1.03293	1.03155	1.04883	0.984139	1.0133	1.02181	1.0077	0.996697	1.01847	1.17171	0.994253	1.14788	1.05142	1.18476	1.08664	1.16405
	15.9754	1.08062	1.09639	1.14051	1.10456	1.12545	1.18892	0.96045	1.18296	1.17674	1.05809	1.12377	1.08377	1.19779	1.28263	1.07449	1.13844	1.10662	1.02866	1.1804	1.19257	1.12619	0.0159709			1.0684	1.08928	0.983068	1.03487	1.05253	1.01351	1.08483	0.988342	1.03936	1.03669	1.04919	0.984612	1.01582	1.02442	1.00205	0.997228	1.02263	1.16721	1.00158	1.14786	1.05765	1.18583	1.08746	1.1612
	16.4754	1.07723	1.09326	1.14117	1.10392	1.12564	1.18862	0.959681	1.18448	1.17483	1.06158	1.11669	1.0768	1.18885	1.28159	1.07329	1.1229	1.11086	1.02915	1.17985	1.1912	1.12408	0.0158816			1.07469	1.08498	0.975387	1.03289	1.05661	1.0166	1.08168	0.987507	1.03879	1.03239	1.04936	0.982981	1.01687	1.02624	0.996173	0.995304	1.02171	1.16759	0.994114	1.14454	1.06049	1.18625	1.08812	1.1606
	16.9754	1.07139	1.0965	1.13656	1.10565	1.12422	1.18891	0.957325	1.18288	1.17692	1.05394	1.12201	1.07607	1.18007	1.27748	1.07108	1.12864	1.10729	1.02932	1.18035	1.19238	1.12295	0.0159014			1.06307	1.08533	0.97366	1.03505	1.06249	1.01419	1.07603	0.986241	1.03701	1.0371	1.04999	0.986272	1.01282	1.02673	0.992019	0.994143	1.02096	1.16406	0.999776	1.14448	1.06304	1.18682	1.09226	1.16097
	17.4754	1.07846	1.09958	1.1403	1.10497	1.12833	1.19246	0.957202	1.18475	1.18088	1.06149	1.11952	1.07909	1.1868	1.28338	1.0707	1.11894	1.09628	1.02935	1.17867	1.19031	1.12407	0.0160608			1.06012	1.08448	0.96022	1.02294	1.06514	0.999475	1.07199	0.978528	1.03036	1.03574	1.04991	0.987341	1.0188	1.02679	0.992723	0.992108	1.02004	1.16495	0.990977	1.14368	1.06818	1.18556	1.09287	1.1631
	17.9754	1.07761	1.09173	1.13708	1.10405	1.12562	1.19316	0.955733	1.18545	1.17944	1.06192	1.11873	1.0745	1.19565	1.27999	1.0729	1.11422	1.10532	1.02696	1.17114	1.18806	1.12296	0.0160826			1.06589	1.08462	0.972636	1.03832	1.09178	1.01353	1.07395	0.985332	1.04076	1.03159	1.05043	0.984899	1.01515	1.02699	0.997588	0.992413	1.02221	1.15359	0.983268	1.13724	1.0641	1.18455	1.09466	1.15823
	18.4754	1.08586	1.10166	1.13821	1.10317	1.12666	1.19343	0.95473	1.18449	1.18175	1.04947	1.11241	1.07474	1.1793	1.27731	1.0685	1.11528	1.10053	1.03177	1.17369	1.18544	1.12192	0.0159038			1.06768	1.08224	0.971003	1.03307	1.09798	1.01055	1.07525	0.983889	1.04021	1.03351	1.04845	0.9823	1.01415	1.02769	0.99613	0.996565	1.02524	1.15678	0.992187	1.13957	1.07439	1.18482	1.10189	1.16171
	18.9754	1.07841	1.09382	1.13648	1.10406	1.12852	1.19555	0.953524	1.18417	1.18307	1.04884	1.10885	1.0604	1.16791	1.26985	1.06517	1.10468	1.09737	1.03119	1.16827	1.18565	1.11829	0.0159144			1.05906	1.08209	0.95999	1.02315	1.09135	0.994765	1.06377	0.976055	1.03128	1.02836	1.05125	0.984611	1.02023	1.02696	1.00444	0.994328	1.01849	1.15661	0.986157	1.13858	1.07506	1.18599	1.09862	1.15894
	19.4754	1.07864	1.09437	1.1328	1.09996	1.12638	1.19506	0.952783	1.18591	1.18057	1.04798	1.11014	1.06082	1.16265	1.26639	1.06487	1.10865	1.1434	1.02197	1.17826	1.18148	1.11965	0.0159864			1.06232	1.08284	0.955086	1.02776	1.09609	0.995822	1.06268	0.977516	1.03251	1.03113	1.04685	0.982839	1.01575	1.02795	0.997667	0.998461	1.01964	1.15115	0.987094	1.13638	1.07682	1.18267	1.10501	1.15867
	19.9754	1.08709	1.08621	1.13443	1.09932	1.12923	1.19859	0.952805	1.18603	1.18017	1.04375	1.11145	1.05284	1.16504	1.27334	1.0667	1.1047	1.06234	1.0317	1.15623	1.18739	1.11547	0.0162735			1.05653	1.07847	0.959896	1.02267	1.10061	0.994008	1.06084	0.975731	1.03109	1.02954	1.05159	0.984214	1.01504	1.0291	0.999321	0.999865	1.02121	1.15061	0.987631	1.1327	1.07827	1.18938	1.10468	1.16133
	20.4754	1.08675	1.08642	1.13313	1.0946	1.12697	1.19992	0.951974	1.18478	1.17034	1.04142	1.11055	1.05359	1.16374	1.2687	1.06231	1.11396	1.14014	1.02237	1.18049	1.17867	1.11854	0.0161823			1.0603	1.07863	0.954653	1.02849	1.09556	0.993487	1.06012	0.972377	1.03045	1.03778	1.05417	0.984387	1.01924	1.02842	1.00181	0.99843	1.01663	1.15003	0.987149	1.13107	1.08003	1.18837	1.10736	1.16079
	20.9754	1.07645	1.09353	1.1316	1.09783	1.12632	1.19992	0.953387	1.18334	1.16486	1.04597	1.1099	1.05314	1.16282	1.27006	1.06402	1.10602	1.09662	1.02537	1.15855	1.18175	1.11507	0.0158515			1.05749	1.07736	0.96994	1.02724	1.10317	0.998956	1.05411	0.981252	1.03369	1.0328	1.05763	0.985516	1.01944	1.02903	1.00632	1.00108	1.02136	1.14644	0.986578	1.12695	1.0817	1.1867	1.10769	1.16111
	21.4754	1.07481	1.0947	1.1299	1.09536	1.12589	1.20123	0.9508	1.18519	1.15779	1.04233	1.10844	1.05341	1.15335	1.26609	1.06284	1.10458	1.09822	1.02654	1.15923	1.1809	1.11358	0.0157714			1.06088	1.0766	0.96904	1.03142	1.1032	0.999903	1.05898	0.980143	1.03502	1.03683	1.05125	0.982214	1.02002	1.02966	1.00664	1.00364	1.02196	1.14263	0.991035	1.12563	1.08247	1.18848	1.10622	1.16112
	21.9754	1.06711	1.08887	1.13002	1.09385	1.1244	1.20479	0.949699	1.1846	1.17224	1.03219	1.1059	1.0483	1.14892	1.26178	1.06226	1.0991	1.09369	1.02618	1.15981	1.18136	1.11175	0.0161333			1.06028	1.07386	0.96754	1.02877	1.10403	0.996798	1.05627	0.97876	1.03329	1.03176	1.05788	0.984943	1.02256	1.03058	1.00703	1.00645	1.0191	1.14171	0.990188	1.12597	1.08413	1.19501	1.10706	1.16327
	22.4754	1.07663	1.08194	1.12774	1.09064	1.12494	1.20329	0.948349	1.18491	1.16139	1.03641	1.10381	1.04881	1.14625	1.25809	1.06011	1.10143	1.09135	1.02264	1.15434	1.17893	1.1101	0.0158612			1.06092	1.07502	0.95682	1.02642	1.09305	0.991936	1.04525	0.974798	1.02802	1.02713	1.05056	0.981469	1.01788	1.03003	1.0133	1.01101	1.02018	1.14082	0.982196	1.12204	1.0878	1.19428	1.11055	1.16363
	22.9754	1.07057	1.08776	1.1272	1.08999	1.12493	1.20555	0.94906	1.18327	1.17529	1.03299	1.10325	1.0439	1.13787	1.25455	1.05674	1.09421	1.09498	1.02459	1.15367	1.17419	1.10923	0.0159166			1.05416	1.07353	0.965955	1.03074	1.08846	0.997338	1.04777	0.976242	1.02927	1.02908	1.0486	0.980331	1.01852	1.02901	1.01555	1.00799	1.01872	1.13661	0.978443	1.11927	1.08594	1.19412	1.10921	1.16756
	23.4754	1.06805	1.08805	1.12701	1.08762	1.12674	1.20714	0.948209	1.18342	1.1653	1.02881	1.1023	1.04707	1.14462	1.25742	1.05428	1.08741	1.08569	1.0231	1.15338	1.1762	1.10809	0.0161298			1.05707	1.06975	0.968386	1.02662	1.08881	0.992558	1.04853	0.975226	1.02837	1.02791	1.04544	0.981677	1.01847	1.02939	1.02019	1.01035	1.0169	1.13369	0.985107	1.12246	1.08948	1.1956	1.11042	1.16541
	23.9754	1.06003	1.08241	1.12532	1.08944	1.1256	1.20513	0.947545	1.17998	1.16666	1.02969	1.09722	1.04232	1.13108	1.25334	1.05595	1.0846	1.08333	1.02357	1.15405	1.1766	1.10569	0.0160301			1.05669	1.0711	0.964047	1.02586	1.08569	0.998171	1.0463	0.975575	1.02793	1.0285	1.04929	0.976543	1.01816	1.0302	1.01834	1.01522	1.01637	1.13295	0.983763	1.11474	1.08503	1.19532	1.11185	1.16616
	24.4754	1.06888	1.0773	1.12548	1.09072	1.12706	1.20945	0.946538	1.18167	1.15213	1.02337	1.09921	1.05445	1.14182	1.25132	1.05468	1.08639	1.07929	1.02379	1.14693	1.17158	1.1056	0.0158643			1.06517	1.07008	0.952023	1.02375	1.07856	0.986258	1.04282	0.977175	1.02448	1.02593	1.05402	0.981191	1.01951	1.02999	1.01196	1.01725	1.0112	1.12806	0.979161	1.11183	1.0867	1.19686	1.10993	1.16913
	24.9754	1.06483	1.08028	1.12327	1.08943	1.12813	1.20846	0.946055	1.18021	1.16219	1.02532	1.09581	1.05013	1.1392	1.24585	1.05486	1.08214	1.08688	1.02078	1.14603	1.17068	1.10503	0.0158229			1.06457	1.06824	0.954624	1.02209	1.08003	0.987451	1.0411	0.970194	1.02354	1.0238	1.04537	0.978846	1.02	1.02811	1.01128	1.0191	1.01022	1.13006	0.976112	1.11169	1.08447	1.19541	1.11084	1.16816
	25.4754	1.06413	1.07889	1.12445	1.0892	1.12657	1.20984	0.944733	1.18084	1.16536	1.02469	1.09382	1.05187	1.13554	1.24707	1.05162	1.08154	1.08252	1.02041	1.14548	1.16938	1.1044	0.0159663			1.06395	1.06815	0.956104	1.02374	1.07575	0.987608	1.0433	0.971975	1.02382	1.02844	1.04819	0.97635	1.02113	1.0311	1.01175	1.0237	1.00954	1.12581	0.975958	1.11126	1.08833	1.1962	1.11161	1.17063
	25.9754	1.07024	1.07931	1.1241	1.08742	1.12475	1.20872	0.944501	1.17724	1.15844	1.01941	1.0961	1.05418	1.13143	1.24077	1.05081	1.08146	1.07839	1.01956	1.14303	1.16792	1.10289	0.0156828			1.05245	1.0651	0.959026	1.03038	1.07467	0.995469	1.03774	0.972839	1.02346	1.02836	1.04517	0.977983	1.01757	1.03105	1.01027	1.02092	1.00727	1.12241	0.974958	1.10813	1.08835	1.19903	1.1093	1.16784
	26.4754	1.06769	1.06986	1.12091	1.08465	1.12481	1.20894	0.943674	1.17948	1.14911	1.02048	1.10486	1.04732	1.12288	1.23935	1.04939	1.07995	1.08178	1.0225	1.14064	1.16857	1.10134	0.0156406			1.055	1.06373	0.951698	1.03019	1.07737	0.983216	1.03352	0.97099	1.02072	1.02527	1.04976	0.979635	1.0206	1.03169	1.00976	1.02272	1.00747	1.12248	0.981814	1.10171	1.08516	1.19567	1.10741	1.16833
	26.9754	1.07781	1.07839	1.12291	1.08319	1.12383	1.20852	0.943765	1.17799	1.15601	1.01756	1.10061	1.04479	1.12403	1.2382	1.04861	1.08239	1.07837	1.01637	1.13721	1.1642	1.10124	0.0156566			1.04818	1.06306	0.94572	1.02459	1.07171	0.989496	1.03864	0.9726	1.01925	1.02838	1.04741	0.980774	1.02112	1.03256	1.00835	1.02248	1.0036	1.12203	0.976393	1.09913	1.08589	1.19316	1.10911	1.16538
	27.4754	1.08082	1.06862	1.12188	1.08062	1.12235	1.20823	0.942883	1.17818	1.15067	1.01368	1.09923	1.04175	1.11009	1.23631	1.04862	1.08056	1.07422	1.02043	1.1385	1.1652	1.09914	0.0156479			1.0542	1.06213	0.94815	1.02843	1.07206	0.989867	1.03471	0.974156	1.02046	1.02362	1.04713	0.978825	1.0226	1.03172	1.01069	1.02435	1.00974	1.11736	0.981679	1.09862	1.0865	1.19491	1.10873	1.16666
	27.9754	1.08012	1.07416	1.11993	1.08658	1.12374	1.21184	0.94326	1.17679	1.15291	1.01048	1.09691	1.04206	1.11884	1.23167	1.0445	1.0748	1.07075	1.0174	1.13434	1.16292	1.0987	0.0156899			1.04914	1.06259	0.946891	1.0256	1.07463	0.98249	1.03482	0.969522	1.01821	1.02578	1.04507	0.977534	1.01939	1.03249	1.01771	1.02892	1.0073	1.11425	0.971137	1.10011	1.08751	1.19463	1.10777	1.16434
	28.4754	1.07428	1.07072	1.12153	1.08065	1.12636	1.20864	0.942524	1.17707	1.13759	1.00659	1.09776	1.04284	1.11694	1.23229	1.04396	1.07702	1.06562	1.01503	1.13039	1.16153	1.09647	0.0156709			1.04798	1.06216	0.952961	1.02628	1.07409	0.983139	1.03174	0.968511	1.01836	1.02495	1.04571	0.97483	1.01884	1.03179	1.02082	1.03134	1.00558	1.11312	0.971291	1.09012	1.07958	1.19225	1.10778	1.16056
	28.9754	1.07502	1.06641	1.1187	1.07998	1.12154	1.21078	0.939408	1.17565	1.15763	1.01055	1.10082	1.04875	1.10824	1.22839	1.04419	1.07957	1.06947	1.01411	1.13317	1.157	1.09697	0.0156657			1.05588	1.05924	0.945928	1.02375	1.0657	0.982573	1.03109	0.971685	1.01698	1.02487	1.04593	0.978345	1.01639	1.0303	1.02024	1.02922	1.00296	1.11223	0.964288	1.09649	1.07607	1.19237	1.10774	1.16174
	29.4754	1.06376	1.06291	1.11708	1.07713	1.12419	1.21093	0.941763	1.17338	1.14569	1.00635	1.10364	1.04234	1.11658	1.2232	1.04031	1.0672	1.04534	1.01252	1.12037	1.15401	1.09243	0.0157223			1.04916	1.05632	0.947208	1.0307	1.07161	0.982624	1.02918	0.970367	1.01715	1.0199	1.04392	0.976334	1.01656	1.03104	1.02557	1.02653	1.009	1.10971	0.96726	1.09205	1.08009	1.19095	1.10466	1.15257
	MAX	1.098	1.10602	1.14216	1.12149	1.12923	1.21184	1	1.18603	1.18687	1.08209	1.1436	1.09671	1.2391	1.29618	1.08448	1.15399	1.1696	1.0333	1.20819	1.19681	1.144	0.01581			1.09963	1.08928	0.996484	1.03867	1.10403	1.0166	1.09109	0.996409	1.04095	1.05888	0.996671	1.03337	1.03394	1.04349	1.05219	1.02524	1.17263	1.01004	1.15486	1.08948	1.19903	1.11185	1.17063	1.05134
																								Unpaired t test
																								P value	0.0002
																								P value summary	***
																								Significantly different (P < 0.05)?	Yes
																								One- or two-tailed P value?	Two-tailed
																								t, df	t=4.046 df=46
																								How big is the difference?
																								Mean ± SEM of column A	1.144 ± 0.01581, n=20
																								Mean ± SEM of column B	1.071 ± 0.01046, n=28
																								Difference between means	-0.07361 ± 0.01819
																								95% confidence interval	-0.1102 to -0.03699
																								R squared (eta squared)	0.2624
																								F test to compare variances
																								F, DFn, Dfd	1.632, 19, 27
																								P value	0.2382
																								P value summary	ns
																								Significantly different (P < 0.05)?	No
[truncated: 52 more columns]

## Sheet: Figure 3 - Supplement 4
		eGFP-RalGDS Translocation assay														eGFP only translocation assay						eGFP-RalGDS + Rap1GAP
	Time (min)	Cell 1	Cell 2	Cell 3	Cell 4	Cell 5	Cell 6	Cell 7	Cell 8	Cell 9	Cell 10	Cell 11			Time (min)	Cell 1	Cell 2	Cell 3			Time (min)	Cell 1	Cell 2	Cell 3	Cell 4	Cell 5
	-6.58763					1.1024	1.10944	1.24938	1.17866	1.03289	0.98611	1.00797			-6.00347	0.987036	1.0294	1.00901			-5.50415	1.0751	1.06108	1.01384	0.986305	0.950229
	-6.04935					1.06898	1.09202	1.23522	1.11545	1.04773	0.978665	1.01657			-5.50317	0.987673	1.01603	0.988025			-5.00377	1.0827	1.05476	0.99177	0.989213	0.980695
	-5.53236	1.10749	1.06741	0.984953	1.16571	1.03145	1.08573	1.23198	1.11138	1.03991	0.950712	1.00468			-5.00288	0.997327	1.01717	0.986415			-4.50339	1.07389	1.05426	0.991114	0.994096	0.978511
	-5.02942	1.10704	1.06983	0.950725	1.08626	1.05117	1.06323	1.23419	1.09134	1.02675	0.971051	0.998154			-4.5026	0.995823	1.01243	0.997416			-4.00302	1.06278	1.03436	1.0086	0.986742	0.976271
	-4.52396	1.08056	1.08036	0.94498	1.02764	0.983868	1.04371	1.20095	1.04586	1.02088	0.989868	0.983515			-4.00231	1.00134	1.0065	0.969767			-3.50264	1.06549	1.03469	1.01248	1.01489	0.95973
	-4.0213	1.05867	1.05945	0.952645	0.99518	0.973566	1.02129	1.23478	1.05044	1.01525	1.01025	0.966712			-3.50202	1.00296	1.00731	0.979588			-3.00227	1.06675	1.01797	1.00777	1.02103	0.962687
	-3.51864	1.01766	1.03749	0.969408	1.00365	0.983831	1.02359	1.20582	1.03791	1.01743	0.989619	0.982873			-3.00173	0.999082	1.00293	0.970645			-2.50188	1.06068	1.0113	1.00981	1.0245	0.976543
	-3.01598	1.03214	1.02161	0.968821	0.993254	0.968178	1.05821	1.20655	1.03174	1.01386	0.988488	0.990768			-2.50144	1.00428	1.00293	0.976777			-2.00151	1.06394	0.996831	1.0068	1.00881	0.982378
	-2.51331	1.02808	0.988421	0.978273	1.00592	0.964565	1.04554	1.1479	1.05536	1.01837	0.974879	0.993501			-2.00116	0.997205	1.00416	1.00144			-1.50113	1.03574	0.983264	0.990615	1.00048	1.01195
	-2.01065	1.05357	0.967399	1.00363	1.01064	0.974835	1.04343	1.11065	1.04129	1.01052	0.982059	1.00066			-1.50087	0.98922	1.01313	0.988172			-1.00076	1.0238	0.993425	0.993299	0.993358	1.02549
	-1.50799	1.0085	0.991258	0.991244	1.02403	0.978315	1.02578	1.07095	0.984212	1.01606	0.990708	1.00884			-1.00057	0.990258	1.0027	0.997811			-0.500378	0.998993	1.00288	0.997729	0.990198	1.00985
	-1.00532	1.0082	1.00388	1.00656	0.997446	0.981596	1.02269	1.02132	0.979235	1.00624	1.01834	0.997894			-0.500283	0.987809	1.00071	0.996941		EGF Addition	0	1	1	1	1	1
	-0.502663	1.00014	0.975733	1.01148	0.985855	0.988611	1.03865	1.03829	1.04998	1.01364	0.99799	1.01533		EGF Addition	0	1	1	1			1.00075	1.02888	0.981694	0.990276	0.988466	1.03637
EGF Addition	0	1	1	1	1	1	1	1	1	1	1	1			1.00057	1.0071					1.50113	1.05517	0.975068	1.00046	0.988658	1.07973
	1.00593			1.00759	1.27699					1.06703	1.13664	1.11056			1.50087	1.01261	0.99596	1.04305			2.00151	1.0729	0.96815	1.01591	0.976349	1.12733
	1.50799	1.13	1.22245	0.98017	1.45241	1.57342	1.39848	1.58489	1.77715	1.13438	1.20951	1.12388			2.00116	1.04725	1.00028	1.08871			2.50189	1.03961	0.98159	1.0359	0.977121	1.15847
	2.01065	1.2897	1.62958	0.998838	1.59315	1.57007	1.36844	1.5836	1.87007	1.17272	1.24489	1.13781			2.50144	1.06191	1.03302	1.1579			3.00226	1.05921	0.979186	1.01928	0.965076	1.17889
	2.51331	1.33896	1.58596	1.10662	1.54832	1.53513	1.43344	1.55072	2.03422	1.17338	1.23935	1.12767			3.00172	1.06409	1.02938	1.16786			3.50264	1.08301	0.984217	1.0029	0.972739	1.18937
	3.01597	1.35096	1.65356	1.26085	1.54327	1.55133	1.4559	1.60133	2.05467	1.18664	1.27199	1.14425			3.50202	1.05188	1.04985	1.1787			4.00302	1.08952	0.984169	0.993167	1.0004	1.18286
	3.51864	1.37378	1.74797	1.35606	1.57182	1.52876	1.42826	1.65487	2.1349	1.18587	1.29453	1.15986			4.00231	1.04268	1.05475	1.17366			4.50339	1.11107	0.990665	0.97321	1.01227	1.16857
	4.0213	1.37756	1.70845	1.43313	1.51828	1.56441	1.42632	1.65005	2.08951	1.20657	1.31994	1.15013			4.5026	1.04595	1.04302	1.14679			5.00377	1.08289	1.00949	0.943149	0.934443	1.15049
	4.52396	1.38797	1.79927	1.51639	1.48994	1.53397	1.40288	1.68546	2.18006	1.18983	1.33877	1.16331			5.00288	1.03578	1.05153	1.13642			5.50414	1.05652	1.01558	0.93404	0.913742	1.15662
	5.02663	1.43073	1.82003	1.53554	1.49199	1.4981	1.36926	1.80604	2.27418	1.19014	1.34551	1.16529			5.50317	1.04163	1.04341	1.15989			6.00453	1.02781	1.02656	0.931398	0.890705	1.17232
	5.52929	1.46542	1.81108	1.62465	1.46053	1.49488	1.35034	1.87233	2.24611	1.16945	1.35798	1.17457			6.00346	1.0228	1.0498	1.18372			6.5049	1.05992	1.02343	0.927631	0.92161	1.18181
	6.03196	1.43853	1.78268	1.6131	1.49383	1.44729	1.33476	1.85856	2.30279	1.17401	1.35407	1.15946			6.50375	1.03261	1.05145	1.16114			7.00528	1.05037	1.02569	0.92313	0.904849	1.16049
	6.53462	1.5227	1.83727	1.61286	1.44355	1.4152	1.3132	1.93199	2.38865	1.16162	1.35303	1.14325			7.00404	1.02856	1.05015	1.14591			7.50566	1.04728	1.03204	0.922125	0.917491	1.14262
	7.03728	1.4832	1.91868	1.60651	1.45717	1.36067	1.31847	1.80188	2.38397	1.17007	1.38404	1.15519			7.50432	1.04098	1.05579	1.14159			8.00603	1.03906	1.03725	0.935818	0.898051	1.16339
	7.53994	1.58544	1.93866	1.58888	1.42817	1.35248	1.34965	1.87276	2.43822	1.15697	1.36718	1.13943			8.00462	1.06027	1.04958	1.14756			8.50641	1.02449	1.02716	0.938173	0.898656	1.19107
	8.0426	1.56867	1.92645	1.5826	1.38603	1.288	1.31136	1.82782	2.31763	1.15761	1.37614	1.14848			8.50491	1.06159	1.05076	1.15823			9.00679	0.993759	1.03776	0.948982	0.897841	1.16145
	8.54527	1.61726	1.93466	1.61105	1.38709	1.28234	1.28108	1.71831	2.35105	1.16063	1.39558	1.16073			9.00519	1.06116	1.05743	1.16386			9.50717	0.998278	1.04044	0.940224	0.902822	1.17289
	9.04793	1.68224	2.00567	1.59844	1.31859	1.2466	1.28003	1.82868	2.39258	1.15677	1.39897	1.15922			9.50548	1.06614	1.05113	1.15318			10.0075	1.01498	1.06316	0.956995	0.923543	1.15788
	9.55059	1.56049	1.97461	1.56167	1.29638	1.21313	1.31918	1.71091	2.32247	1.15418	1.38872	1.15454			10.0058	1.07216	1.05487	1.16557			10.5079	0.982922	1.08778	0.954202	0.962922	1.15413
	10.0533	1.57824	1.97397	1.51916	1.27255	1.26501	1.31249	1.70066	2.29852	1.15584	1.41722	1.14749			10.5061	1.08714	1.06239	1.14276			11.0083	0.974855	1.10392	0.959451	0.931506	1.20356
	10.5559	1.61993	1.9371	1.50251	1.30512	1.26583	1.29257	1.71569	2.29461	1.15813	1.40512	1.16391			11.0063	1.06882	1.05404	1.14945			11.5087	0.991374	1.09838	0.950339	0.976611	1.16695
	11.0586	1.60306	1.96395	1.48151	1.263	1.29102	1.30602	1.64742	2.24051	1.16532	1.3904	1.17752			11.5066	1.07537	1.05618	1.15795			12.009	0.990707	1.1185	0.946899	0.950593	1.12551
	11.5612	1.57453	1.9482	1.51167	1.22125	1.26541	1.31252	1.57837	2.19714	1.14042	1.37951	1.16104			12.0069	1.08144	1.04262	1.15604			12.5094	0.995982	1.13392	0.944572	0.929817	1.10678
	12.0639	1.56131	1.90766	1.47247	1.20602	1.21319	1.3222	1.56507	2.25259	1.16083	1.39634	1.16026			12.5072	1.08466	1.04691	1.15384			13.0098	0.961404	1.14012	0.975963	0.921656	1.10498
	12.5666	1.57877	1.87686	1.46949	1.23465	1.23918	1.33085	1.5549	2.23641	1.16009	1.3851	1.15076			13.0075	1.10214	1.04371	1.17332			13.5102	0.938932	1.14989	0.986674	0.921743	1.10099
	13.0692	1.52778	1.87383	1.4289	1.20314	1.22139	1.29401	1.50723	2.19827	1.16418	1.38157	1.12832			13.5078	1.10429	1.04671	1.17502			14.0106	0.911056	1.16511	1.00599	0.965828	1.10279
	13.5719	1.51777	1.86567	1.39765	1.18583	1.18366	1.27043	1.50214	2.21807	1.16408	1.42691	1.14044			14.0081	1.10726	1.04543	1.16106			14.5109	0.896197	1.17231	1.02995	1.00174	1.09135
	14.0746	1.54849	1.82542	1.41937	1.15967	1.19868	1.25718	1.49398	2.18198	1.16003	1.40016	1.12093			14.5084	1.09858	1.04616	1.14996			15.0113	0.899527	1.17022	1.05083	1.00909	1.07378
	14.5772	1.489	1.75522	1.39411	1.15733	1.20751	1.21484	1.50929	2.08101	1.17377	1.42772	1.11967			15.0086	1.09122	1.04266	1.11848			15.5117	0.894614	1.16501	1.04023	0.985788	1.10271
	15.0799	1.548	1.7503	1.34532	1.14381	1.18715	1.22663	1.53022	2.13133	1.17517	1.4141	1.13269			15.5089	1.07973	1.04458	1.12792			16.0121	0.886272	1.17298	0.994687	0.950252	1.09119
	15.5825	1.55734	1.70905	1.32148	1.1557	1.21008	1.19664	1.48468	2.07834	1.18195	1.41782	1.1392			16.0092	1.08408	1.03998	1.1151			16.5124	0.895968	1.14357	0.986621	0.916425	1.09909
	16.0852	1.51878	1.74191	1.27917	1.16964	1.19001	1.2041	1.49115	2.0554	1.17197	1.41012	1.13312			16.5095	1.09563	1.04064	1.1121			17.0128	0.849329	1.15272	0.994017	0.88748	1.13387
	16.5879	1.48252	1.67861	1.26733	1.13918	1.21086	1.22059	1.47458	1.98858	1.19347	1.43658	1.1119			17.0098	1.07558	1.03884	1.10071			17.5132	0.839355	1.14603	0.975062	0.873711	1.17135
	17.0905	1.45286	1.70448	1.25075	1.13873	1.24255	1.19731	1.45216	1.97386	1.20132	1.38947	1.14431			17.5101	1.07192	1.04635	1.08572			18.0136	0.825363	1.14952	0.973542	0.85792	1.16826
	17.5932	1.44349	1.61709	1.25122	1.11966	1.25938	1.18168	1.44233	1.95006	1.19553	1.38152	1.14358			18.0104	1.09615	1.04281	1.05809			18.514	0.802115	1.15893	0.973211	0.850049	1.12262
	18.0959	1.43248	1.64312	1.26523	1.15548	1.20985	1.15079	1.37328	1.88877	1.18728	1.37919	1.14056			18.5107	1.09355	1.03538	1.08077			19.0143	0.816373	1.17269	0.967954	0.857888	1.08575
	18.5985	1.44991	1.63004	1.24514	1.15396	1.20612	1.16514	1.30935	1.8603	1.18581	1.35448	1.13741			19.011	1.09879	1.02962	1.0871			19.5147	0.796799	1.17829	0.956548	0.861104	1.07925
	19.1012	1.42466	1.61142	1.24572	1.14428	1.17735	1.12171	1.33558	1.89301	1.18531	1.36013	1.14983			19.5113	1.09848	1.02677	1.06996			20.0151	0.815141	1.17735	0.957416	0.911421	1.12005
	19.6038	1.41556	1.59682	1.22998	1.14851	1.17736	1.08903	1.30278	1.86761	1.17398	1.33113	1.1142			20.0115	1.08862	1.02592	1.07772			20.5155	0.806504	1.18809	0.954804	0.872798	1.12169
	20.1065	1.42057	1.634	1.23201	1.1413	1.17109	1.10402	1.25904	1.83931	1.18101	1.34303	1.12323			20.5118	1.09825	1.02202	1.09225			21.0158	0.800694	1.18667	0.927411	0.900352	1.13719
	20.6092	1.40847	1.58667	1.232	1.15384	1.18795	1.06112	1.25688	1.83379	1.21031	1.3248	1.14135			21.0121	1.09361	1.01901	1.09798			21.5162	0.803606	1.17485	0.947121	0.90098	1.10079
	21.1118	1.41399	1.58617	1.2164	1.167	1.16127	1.04274	1.23429	1.82373	1.20048	1.32059	1.15622			21.5124	1.10093	1.02382	1.09701			22.0166	0.786127	1.18225	0.931972	0.86073	1.09069
	21.6145	1.42644	1.57422	1.22436	1.12954	1.16575	1.03025	1.26188	1.81509	1.20246	1.33444	1.1467			22.0127	1.08315	1.02288	1.08258			22.517	0.782042	1.19984	0.94648	0.852772	1.07136
	22.1172	1.43723	1.51924	1.23986	1.12338	1.14739	1.04853	1.30348	1.81169	1.19198	1.30462	1.14397			22.513	1.09828	1.01819	1.07966			23.0174	0.789405	1.20051	0.959627	0.85842	1.06543
	22.6198	1.4097	1.52546	1.25301	1.13061	1.07167	1.1015	1.24346	1.75836	1.1853	1.29633	1.14426			23.0133	1.08423	1.02178	1.08701			23.5177	0.787608	1.21311	0.954726	0.885858	1.06201
	23.1225	1.37694	1.52271	1.27928	1.11669	1.08092	1.09258	1.25633	1.74829	1.18199	1.29326	1.15627			23.5136	1.09715	1.01973	1.0737			24.0181	0.749217	1.19878	0.961923	0.914947	1.10807
	23.6251	1.3735	1.4805	1.24093	1.12388	1.11116	1.04677	1.25081	1.71575	1.18938	1.25285	1.14333			24.0139	1.09182	1.02267	1.07311			24.5185	0.76276	1.1929	0.945079	0.945765	1.14168
	24.1278	1.33097	1.50945	1.26687	1.10395	1.09768	1.04542	1.24203	1.75347	1.18236	1.26833	1.15312			24.5141	1.11205	1.02595	1.07578			25.0189	0.760113	1.20288	0.972797	0.931751	1.15066
	24.6305	1.34474	1.45847	1.27731	1.11759	1.12477	1.06871	1.21751	1.73729	1.19201	1.21111	1.14651			25.0144	1.10621	1.02242	1.08734			25.5192	0.756628	1.19852	0.960723	0.931594	1.15265
	25.1331	1.38011	1.44313	1.27528	1.09569	1.10956	1.05784	1.24724	1.66188	1.19353	1.2056	1.15204			25.5147	1.11364	1.02167	1.08358			26.0196	0.744623	1.19577	0.953287	0.884117	1.14285
	25.6358	1.36389	1.42883	1.24148	1.112	1.08801	1.03496	1.21434	1.68561	1.17886	1.23006	1.15664			26.015	1.12121	1.02129	1.05483			26.52	0.740056	1.18997	0.953719	0.870339	1.10837
	26.1385	1.35673	1.4169	1.2682	1.12354	1.08455	1.03408	1.1676	1.65701	1.17098	1.23476	1.16094			26.5153	1.10283	1.0135	1.09934			27.0204	0.744126	1.18535	0.950802	0.87651	1.13081
	26.6411	1.35429	1.42451	1.27105	1.10285	1.07272	1.02403	1.17848	1.68803	1.19107	1.22993	1.15774			27.0156	1.11506	1.01707	1.11964			27.5207	0.724778	1.19785	0.948232	0.917391	1.11569
	27.1438	1.3526	1.41096	1.26086	1.10085	1.08726	1.01061	1.18217	1.63542	1.17683	1.23038	1.13911			27.5159	1.1048	1.02339	1.11967			28.0211	0.701566	1.19028	0.949904	0.919	1.15683
	27.6464	1.36719	1.38319	1.24859	1.11078	1.11457	1.00184	1.16907	1.6151	1.13385	1.22973	1.14569			28.0162	1.10679	1.0247	1.12044			28.5215	0.722539	1.19307	0.973036	0.892763	1.15832
	28.1491	1.35186	1.38812	1.27536	1.07115	1.07492	0.986807	1.14425	1.58683	1.15076	1.2135	1.161			28.5164	1.12496	1.0259	1.13108			29.0219	0.720705	1.18329	0.981148	0.878378	1.13988
	28.6518	1.32019	1.40566	1.29318	1.11451	1.07722	0.967797	1.10413	1.6393	1.16893	1.20962	1.1542			29.0167	1.09845	1.02465	1.10247			29.5223	0.733957	1.19365	0.972621	0.858486	1.12644
	29.1544	1.30635	1.4059	1.27438	1.05824	1.0598	1.0068	1.11819	1.71773	1.17608	1.24173	1.15001			29.517	1.09591	1.01509	1.08782			30.0226	0.737314	1.17558	0.984456	0.910236	1.13852
	29.6571	1.28203	1.37981	1.26319	1.07629	1.04246	0.977699	1.10987	1.76277	1.17482	1.22314	1.11979			30.0173	1.10305	1.02167	1.11265			30.523	0.73172	1.20145	0.994223	0.937539	1.09476
	30.1598	1.31425	1.38526	1.25847	1.07254	1.02636	0.969302	1.08783	1.74792	1.19156	1.22778	1.12063			30.5176	1.11655	1.02461	1.11295			31.0234	0.722134	1.19189	0.963382	0.97376	1.10744
	30.6624	1.25538	1.38505	1.22671	1.0803	1.03839	0.962344	1.03871	1.72837	1.19868	1.24088	1.11812			31.0179	1.10609	1.01784	1.11833			31.5238	0.715048	1.19188	0.981151	0.923725	1.0901
	31.1651	1.25663	1.39469	1.25196	1.08286	1.01334	0.963646	1.04818	1.68199	1.19535	1.23025	1.12378			31.5182	1.09751	1.0172	1.12207			32.0241	0.734171	1.17877	0.975602	0.926745	1.12269
	31.6677	1.29605	1.34865	1.26197	1.10957	1.01434	0.9478	1.04876	1.6673	1.19103	1.20831	1.13241			32.0185	1.10651	1.01795	1.13418			32.5245	0.733162	1.17567	0.970223	0.944741	1.13216
	32.1704	1.30494	1.37085	1.24202	1.09229	1.02021	0.969053	1.03742	1.64297	1.17859	1.19975	1.11728			32.5188	1.09866	1.01341	1.09243			33.0249	0.720294	1.16329	0.953188	0.91549	1.15358
	32.6731	1.2909	1.35416	1.22128	1.10418	0.992872	0.939586	1.02328	1.61508	1.17821	1.20479	1.11429			33.019	1.10068	1.01551	1.10399			33.5253	0.721495	1.18781	0.931176	0.90621	1.17113
	33.1757	1.29392	1.38232	1.23033	1.08402	0.969836	0.953083	0.99898	1.64015	1.17804	1.22829	1.11916			33.5193	1.13369	1.01424	1.11946			34.0256	0.730485	1.17462	0.923726	0.910602	1.16227
	33.6784	1.29699	1.39109	1.20801	1.11235	0.990621	0.950549	0.987347	1.62987	1.15938	1.23536	1.11387			34.0196	1.13318	1.01592	1.10231			34.526	0.712076	1.16419	0.924833	0.996134	1.13274
	34.1811	1.28928	1.39221	1.22955	1.11313	0.989081	0.935826	1.00172	1.60442	1.15562	1.21017	1.13369			34.5199	1.12438	1.01636	1.10876			35.0264	0.723884	1.16283	0.923855	0.984443	1.11154
	34.6837	1.2763	1.41849	1.20087	1.13477	0.975991	0.940439	1.01533	1.61985	1.16798	1.19878	1.13499			35.0202	1.13341	1.00408	1.10276			35.5268	0.727219	1.15566	0.958227	0.952048	1.08107
	35.1864	1.29765	1.40378	1.19413	1.13625	0.995226	0.978545	1.02657	1.65156	1.175	1.21465	1.15554			35.5205	1.1485	1.00271	1.09952			36.0272	0.711729	1.17234	0.951325	0.953826	1.08404
	35.6891	1.26866	1.39148	1.21478	1.11317	0.994519	0.957863	1.01174	1.66162	1.17925	1.21668	1.15379			36.0208	1.13323	1.00617	1.09092			36.5275	0.718476	1.16299	0.956672	0.94593	1.08437
	36.1917	1.24821	1.40632	1.18944	1.11702	0.986335	0.925818	1.02605	1.64697	1.16492	1.21985	1.14819			36.5211	1.1193	1.01336	1.11209			37.0279	0.72689	1.1669	0.974307	0.912789	1.11988
	36.6944	1.24702	1.38213	1.19079	1.12886	0.972987	0.925185	1.08573	1.62113	1.17285	1.19855	1.12254			37.0213	1.13731	1.00354	1.12269			37.5283	0.735641	1.16497	0.97536	0.923811	1.10168
	37.197	1.27955	1.40644	1.21736	1.14429	1.00358	0.926467	1.03863	1.60263	1.16752	1.17742	1.14667			37.5216	1.12988	1.00915	1.12655			38.0287	0.745716	1.1522	0.969719	0.889239	1.11199
	37.6997	1.25817	1.3798	1.24059	1.15474	0.990493	0.928995	1.04186	1.62215	1.16914	1.18222	1.15915			38.0219	1.12614	1.0179	1.11113			38.529	0.740096	1.15152	0.975014	0.893825	1.11948
	38.2024	1.2497	1.30501	1.22142	1.17092	1.02261	0.958301	1.01801	1.58827	1.17902	1.1896	1.12546			38.5222	1.1431	1.01247	1.08762			39.0294	0.745606	1.14053	0.941846	0.866561	1.1017
	38.705	1.21327	1.37225	1.20059	1.13442	1.02814	0.948985	1.06092	1.58573	1.16754	1.17307	1.12276			39.0225	1.14446	1.00626	1.10063			39.5298	0.747049	1.16955	0.956903	0.902805	1.13246
	39.2077	1.22345	1.32721	1.18729	1.16123	0.997135	0.95201	1.01624	1.53565	1.17243	1.18717	1.09595			39.5228	1.13356	1.01114	1.0875			40.0302	0.731334	1.16518	0.962996	0.937167	1.14673
	39.7104	1.20662	1.36325	1.1915	1.11822	0.951159	0.982193	1.02724	1.55023	1.18394	1.19293	1.09665			40.0231	1.11718	1.01072	1.11517			40.5305	0.737423	1.15748	0.962377	0.943366	1.11771
	40.213	1.21955	1.38593	1.182	1.17033	0.961495	0.962328	0.990717	1.55104	1.1696	1.17739	1.09438			40.5234	1.12755	1.01716	1.12846			41.0309	0.723161	1.15891	0.97212	0.925714	1.12471
	40.7157	1.22726	1.38468	1.16494	1.12312	0.984232	0.967616	1.00477	1.57315	1.15498	1.18527	1.09002			41.0237	1.11968	1.01062	1.12491			41.5313	0.730553	1.1462	0.968052	0.865828	1.11908
	41.2183	1.21238	1.38416	1.19586	1.13073	0.948004	0.966254	1.01027	1.54227	1.16898	1.14422	1.08877			41.5239	1.13392	1.01489	1.10195			42.0317	0.746199	1.129	0.940362	0.89936	1.08675
	41.721	1.1917	1.36303	1.22275	1.15925	0.941238	0.968945	0.976643	1.5569	1.15362	1.1293	1.08186			42.0242	1.13821	1.02073	1.10612			42.5321	0.751579	1.13954	0.937887	0.879306	1.13967
	42.2237	1.23979	1.36367	1.1786	1.10672	0.936762	0.965631	1.01624	1.58831	1.16122	1.11285	1.06828			42.5245	1.11937	1.01735	1.1074			43.0324	0.759535	1.15049	0.96374	0.851438	1.1702
	42.7263	1.23872	1.36066	1.18871	1.15473	0.937007	0.973628	0.991253	1.56888	1.15449	1.12589	1.06092			43.0248	1.13443	1.01374	1.10632			43.5328	0.724149	1.14674	0.969346	0.855297	1.17399
	43.229	1.20089	1.37733	1.21968	1.11377	0.941545	0.98623	0.976733	1.55965	1.171	1.13505	1.08939			43.5251	1.13278	1.01719	1.11623			44.0332	0.742913	1.13857	0.956039	0.86181	1.15625
	43.7317	1.23403	1.34901	1.18095	1.12622	0.972841	0.996278	0.964722	1.53151	1.17428	1.12127	1.08384			44.0254	1.1223	1.01387	1.13115			44.5336	0.7705	1.14096	0.95506	0.858097	1.12144
	44.2343	1.22037	1.36686	1.20575	1.09899	0.9756	0.974531	0.994734	1.54753	1.19744	1.12066	1.09881			44.5257	1.12477	1.02115	1.14005			45.0339	0.781392	1.14382	0.986361	0.883962	1.11277
	44.737	1.25358	1.36257	1.20306	1.10717	0.978347	0.976874	0.999032	1.4951	1.18591	1.13175	1.10606			45.026	1.13972	1.01649	1.14996			45.5343	0.790273	1.13927	0.96252	0.901723	1.09312
	45.2396	1.23336	1.36909	1.17512	1.08273	0.970727	1.00795	0.968617	1.48254	1.18865	1.12359	1.07229			45.5263	1.12042	1.01195	1.13635			46.0347	0.722824	1.15041	0.965038	0.921353	1.11341
	45.7423	1.22319	1.33989	1.17309	1.07368	0.996872	1.00332	0.980591	1.47083	1.18894	1.12766	1.08533			46.0265	1.14408	1.02409	1.12134			46.5351	0.746525	1.14921	0.963051	0.899188	1.12312
	46.245	1.20713	1.40495	1.1891	1.08588	1.04815	0.968857	1.01337	1.46651	1.19677	1.12673	1.0837			46.5268	1.1194	1.02083	1.1322			47.0354	0.752024	1.14242	0.963029	0.891204	1.142
	46.7476	1.20917	1.40518	1.15885	1.10423	1.02421	0.966607	1.0013	1.50007	1.17967	1.12597	1.08096			47.0271	1.12583	1.02569	1.10996			47.5358	0.731053	1.14367	0.982229	0.884187	1.17931
	47.2503	1.22487	1.40294	1.15954	1.13796	1.05561	0.974594	1.01703	1.53834	1.17712	1.14613	1.05913			47.5274	1.13769	1.02437	1.10132			48.0362	0.722959	1.14017	0.99054	0.880693	1.19194
	47.753	1.1921	1.37608	1.14658	1.12333	1.01901	0.994858	1.01946	1.50612	1.19465	1.14674	1.04238			48.0277	1.14648	1.01334	1.1094
	48.2556	1.21679	1.37854	1.18458	1.10284	0.978973	1.00361	1.02748	1.50492	1.17611	1.13796	1.03228			48.528	1.13864	1.01758	1.09695
															49.0283	1.1572	1.01985	1.10788
															49.5286	1.14774	1.01153	1.11012
															50.0289	1.13379	1.01336	1.10375
															50.5292	1.14777	1.02035	1.12466
															51.0294	1.1582	1.01998	1.11204
															51.5297	1.1495	1.01762	1.11678
															52.03	1.15217	1.02306	1.11714
															52.5303	1.16072	1.01674	1.11255
															53.0306	1.16448	1.00854	1.10728
															53.5309	1.17019	1.0136	1.10275
															54.0312	1.16591	1.01458	1.10454

## Sheet: Figure 3 - Supplement 5
		Rap1A-FLARE + Rap1AN17																			Rap1B-FLARE + Rap1BN17																		pmEKAR4 + Rap1AN17
	Time (Min)	Cell 1	Cell 2	Cell 3	Cell 4	Cell 5	Cell 6	Cell 7	Cell 8	Cell 9	Cell 10	Cell 11	Cell 12	Cell 13	Cell 14	AVERAGE	SEM			Time (Min)	Cell 1	Cell 2	Cell 3	Cell 4	Cell 5	Cell 6	Cell 7	Cell 8	Cell 9	Cell 10	Cell 11	Cell 12	AVERAGE	SEM				Time (min)	Cell 1	Cell 2	Cell 3	Cell 4	Cell 5	Cell 6	Cell 7	Cell 8	AVERAGE	SEM
	-4.16567	1.05466	1.00353	0.994349	0.983114	1.00186	0.989713	0.998437	1.0088	1.00222	0.959408	0.979995	0.999786	0.996897	0.989888	0.997332	0.0055327			-7.60308	0.976639	0.982357	1.00051	1.03745	0.982685	1.02166	1.0277	0.97439	0.962886	1.01766	0.997347	1.01193	0.999434	0.00690125				-4.43622	1.01137	1.01194	0.998489	1.01678	0.998827	1.00475	1.00339	1.0034	1.00612	0.00232684
	-3.66567	1.06006	1.00106	1.02088	1.01235	1.00754	1.00083	0.999607	1.03205	1.02279	0.968141	0.981164	1.01542	0.997077	0.98847	1.00767	0.00607901			-7.10308	0.964503	0.958928	0.999804	1.02127	0.965936	0.995582	1.02199	0.967669	0.950963	0.992458	0.993864	1.01024	0.986934	0.00710515				-3.93622	1.00788	1.00395	0.998666	1.01373	0.999817	1.00566	1.00693	1.02469	1.00767	0.00295053
	-3.16567	1.04634	1.00142	1.01668	1.00285	1.00958	1.00464	1.00303	1.02559	1.00371	0.960628	0.973086	1.00867	1.0004	0.991132	1.00341	0.0054933			-6.60308	0.977049	0.963384	1.00527	1.03664	0.965213	1.02464	1.01938	0.97502	0.96725	1.00528	0.995431	1.0057	0.995022	0.00723577				-3.43622	1.00536	1.00645	1.00108	1.01385	1.00121	1.00415	1.00559	0.985738	1.00293	0.00282839
	-2.66567	1.03593	1.00536	1.00634	0.999184	1.00177	0.994621	1.0002	1.0159	0.999265	0.950888	0.98387	0.993696	0.994732	0.988273	0.997859	0.00494989			-6.10308	0.955075	0.967614	1.00053	1.01432	0.958012	1.0148	1.02161	0.990855	0.959206	1.00912	0.993747	1.01486	0.991646	0.00726913				-2.93622	1.00527	1.00385	1.00222	1.01443	1.00261	1.00303	1.00457	1.01233	1.00604	0.0016527
	-2.16567	1.02017	1.00476	1.0124	0.997004	1.01633	1.00601	0.999216	1.0403	1.0093	0.940358	0.995792	1.01792	0.995867	0.991044	1.00332	0.00595102			-5.60308	0.98551	0.965483	1.00889	1.02686	0.966462	1.038	1.02273	1.00133	0.967844	1.00078	0.995945	1.01735	0.999766	0.00709268				-2.43622	1.00878	1.00652	1.00334	1.01402	1.00362	1.00498	1.00516	0.989212	1.00445	0.00249822
	-1.66567	1.04537	0.997451	1.01019	1.00095	1.0061	0.993414	0.993181	1.03319	1.02032	0.944154	0.99884	1.00821	0.989017	0.99469	1.00251	0.00622804			-5.10308	0.972953	0.949846	1.01281	1.03226	0.967007	1.02385	1.03181	0.99568	0.975124	1.00294	1.01389	1.0101	0.999023	0.00780957				-1.93622	1.0081	1.00359	1.00272	1.01267	1.0066	1.00419	1.00497	1.03224	1.00938	0.00345093
	0	1	1	1	1	1	1	1	1	1	1	1	1	1	1	1	0			-4.60308	0.978389	0.958841	0.992521	1.01627	0.967527	1.03091	1.03301	1.00482	0.981084	1.01144	1.03075	1.01033	1.00132	0.00734663				-1.43622	1.00759	1.00259	1.00673	1.01298	1.00456	1.00561	1.00604	0.987525	1.0042	0.00260888
	0.475222	1.15562	1.00945	1.03299	1.04944	1.08425	0.999488	1.08519	1.05905	1.07819	1.05054	1.13454	1.06953	1.12709	1.1058	1.07437	0.012225			-4.10308	0.989047	0.967829	1.02287	1.02908	0.976197	1.03187	1.03822	1.01132	0.984553	1.01979	1.02912	1.02316	1.01026	0.00698907				-1.09283	1.01699	1.00981	1.00945	1.01505	1.0097	1	1	0.998043	1.00738	0.00254537
	0.975222	1.28306	1.01385	1.10601	1.22532	1.218	1.03922	1.25508	1.08306	1.0564	1.01554	1.1906	1.10407	1.27207	1.25556	1.15128	0.0270214			-3.60308	0.978492	0.973437	1.00854	1.00862	0.969436	1.03156	1.03324	0.982015	0.976134	1.00931	1.0234	1.01075	1.00041	0.00673735			EGF Addition	0	1	1	1	1	1	0.991451	0.991682	1	0.997892	0.00138043
	1.47522	1.38681	1.02558	1.15366	1.29619	1.30689	1.1112	1.37003	1.07118	1.04166	1.02931	1.22133	1.13185	1.35926	1.36754	1.20518	0.0373503			-3.10308	0.970293	0.958061	0.988043	1.02739	0.967363	1.03553	1.02967	1.01288	0.995797	1.02462	1.02395	1.01394	1.00396	0.00783914				0.477889	0.997665	0.997503	0.993952	0.994977	0.996341	0.98629	0.991441	1.00193	0.995013	0.00165206
	1.97522	1.42459	1.02491	1.17108	1.338	1.34424	1.15113	1.41797	1.08569	1.03298	1.00779	1.23008	1.15172	1.40439	1.44529	1.2307	0.0433214			-2.60308	0.974561	0.957619	0.98318	1.03101	0.974955	1.03654	1.02687	1.02055	0.981277	1.02431	1.0221	1.02091	1.00449	0.00798649				0.977889	0.996968	0.990825	0.992577	0.992528	0.995392	0.983396	0.989796	1.01888	0.995046	0.00369737
	2.47522	1.39013	1.02256	1.16546	1.32545	1.34731	1.15978	1.42408	1.09097	1.0813	1.02837	1.24986	1.15567	1.41458	1.48964	1.23894	0.0423673			-2.10308	0.989702	0.960019	0.993805	1.03146	0.974795	1.0182	1.02548	1.00437	1.00027	1.01173	1.02915	1.00524	1.00369	0.00628838				1.47789	0.99485	0.987408	0.994391	0.99267	0.993606	0.986057	0.994965	0.970557	0.989313	0.00294014
	2.97522	1.42849	1.02274	1.14655	1.30643	1.33727	1.15569	1.41877	1.07985	1.09724	1.04503	1.24277	1.14194	1.39477	1.49653	1.23672	0.0424316			-1.60308	0.975282	0.968435	0.986186	1.03391	0.974429	1.01385	1.02213	1.00884	1.01799	1.01415	1.00272	1.01823	1.00301	0.00622565				1.97789	1.00412	0.978513	1.00062	0.991017	0.994477	0.985226	0.992572	0.989171	0.991965	0.00287992
	3.47522	1.40273	1.01661	1.13023	1.28386	1.32228	1.15447	1.41451	1.06788	1.07028	1.05319	1.23499	1.12714	1.3522	1.4708	1.22151	0.0407391		EGF Addition	0	1	1	1	1	1	1	1	1	1	1	1	1	1	0				2.47789	1.02957	0.974193	1.00498	0.990755	0.993617	0.996693	0.992061	1.007	0.998608	0.00566717
	3.97522	1.38775	1.01352	1.117	1.24704	1.29344	1.12626	1.37258	1.09589	1.08365	1.03803	1.21513	1.1222	1.31429	1.44334	1.20501	0.0372031			0.475333	1.05312	1.05433	1.03501	1.01781	1.05119	1.06688	1.00941	1.03121	1.0342	1.02841	1.06659	1.02156	1.03914	0.00547843				2.97789	1.08728	0.982945	1.01721	0.993464	0.994409	1.0204	1.00151	1.04152	1.01734	0.0119641
	4.47522	1.36299	1.02491	1.10196	1.22445	1.26213	1.13551	1.36151	1.05347	1.08205	1.05465	1.21323	1.12025	1.28928	1.41402	1.19289	0.0345816			0.975333	1.05969	1.04832	1.06481	0.999966	1.07867	1.07902	1.02022	1.05972	1.12358	1.05456	1.14392	1.07648	1.06741	0.0112758				3.47789	1.15804	1.00241	1.0446	0.999633	0.996841	1.05852	1.02096	1.06711	1.04351	0.0189932
	4.97522	1.32803	1.01794	1.10772	1.20235	1.23771	1.11463	1.33874	1.08586	1.09315	1.08874	1.21786	1.10801	1.26164	1.37686	1.18423	0.0299469			1.47533	1.07144	1.05482	1.08325	1.00247	1.08406	1.08736	1.03613	1.14034	1.15976	1.06375	1.17451	1.1022	1.08834	0.0144549				3.97789	1.19643	1.01966	1.07436	1.01053	0.998057	1.10391	1.0493	1.10148	1.06921	0.0230735
	5.47522	1.30377	1.0121	1.08456	1.19141	1.21438	1.10168	1.30633	1.05573	1.08773	1.03993	1.18987	1.09726	1.214	1.33459	1.15952	0.0282967			1.97533	1.07019	1.05123	1.08656	0.996036	1.08898	1.09157	1.04542	1.15433	1.21491	1.08765	1.17545	1.1241	1.09887	0.0174065				4.47789	1.22457	1.03377	1.10948	1.02996	1.00326	1.15088	1.08751	1.1053	1.09309	0.0255816
	5.97522	1.30092	1.0196	1.07735	1.15458	1.19463	1.08514	1.30137	1.05891	1.10687	1.04705	1.18323	1.09668	1.199	1.30341	1.15205	0.0261831			2.47533	1.03841	1.03258	1.08885	0.989169	1.07773	1.06846	1.05194	1.183	1.19393	1.0724	1.15669	1.11733	1.08921	0.0180774				4.97789	1.23766	1.0447	1.14227	1.05675	1.01417	1.19512	1.13313	1.17183	1.12445	0.0278888
	6.47522	1.30148	1.02119	1.07565	1.14312	1.18808	1.0848	1.28812	1.07834	1.08289	1.05105	1.18072	1.07489	1.17674	1.28367	1.14505	0.0250434			2.97533	1.05383	1.0355	1.08603	1.00354	1.07314	1.06958	1.04558	1.20784	1.19312	1.05218	1.15067	1.11124	1.09019	0.0183661				5.47789	1.24134	1.04771	1.16577	1.0893	1.03091	1.22244	1.17937	1.13088	1.13846	0.0274946
	6.97522	1.28105	1.01217	1.0779	1.12	1.15752	1.06911	1.26062	1.06834	1.09313	1.05429	1.17395	1.0548	1.15351	1.25939	1.13113	0.0230623			3.47533	1.0669	1.03984	1.09995	1.00369	1.06971	1.06513	1.04837	1.22585	1.19599	1.07343	1.13165	1.11715	1.09481	0.0185697				5.97789	1.24543	1.05632	1.18273	1.12741	1.05705	1.24129	1.21677	1.21959	1.16832	0.0277274
	7.47522	1.27167	1.01965	1.06657	1.12024	1.15355	1.08495	1.26041	1.0574	1.1095	1.0677	1.1608	1.08065	1.14092	1.23213	1.13044	0.0208947			3.97533	1.05504	1.01901	1.08405	0.993893	1.06219	1.06734	1.05517	1.21568	1.19045	1.05476	1.11237	1.09955	1.08413	0.018533				6.47789	1.25044	1.06052	1.19186	1.16456	1.08078	1.25737	1.24261	1.19879	1.18087	0.0266302
	7.97522	1.27362	1.01806	1.05592	1.10406	1.12313	1.06216	1.2304	1.0639	1.11464	1.0601	1.15609	1.06531	1.13124	1.22021	1.11992	0.0203157			4.47533	1.04382	1.00256	1.10033	1.00342	1.05502	1.05193	1.02461	1.19528	1.15381	1.02708	1.11478	1.08598	1.07155	0.0174055				6.97789	1.2514	1.06539	1.19836	1.19325	1.10354	1.26735	1.26782	1.16377	1.18886	0.0265825
	8.47522	1.25144	1.01724	1.05877	1.08996	1.1184	1.05961	1.22333	1.05158	1.08509	1.07386	1.14286	1.06347	1.13101	1.21167	1.11273	0.0190932			4.97533	1.02949	1.00008	1.07665	0.986763	1.04019	1.07511	1.04452	1.22818	1.16193	1.03936	1.11212	1.08702	1.07345	0.0197326				7.47789	1.25164	1.06604	1.20212	1.22022	1.12265	1.26926	1.2763	1.2093	1.20219	0.0259371
	8.97522	1.26378	1.01995	1.05323	1.08416	1.11409	1.06087	1.21471	1.06205	1.11775	1.08322	1.14383	1.05838	1.11836	1.19863	1.11378	0.0187009			5.47533	1.02393	1.02019	1.07506	0.997849	1.02876	1.08177	1.0551	1.22427	1.14165	1.04075	1.10164	1.07069	1.07181	0.0179742				7.97789	1.25219	1.06677	1.20217	1.24001	1.13893	1.26845	1.28711	1.18723	1.20536	0.026055
	9.47522	1.24273	1.01311	1.04427	1.08439	1.10659	1.04813	1.20091	1.05982	1.08975	1.10173	1.11472	1.07286	1.11692	1.18837	1.10602	0.017297			5.97533	1.00221	0.971975	1.04464	0.986617	1.0117	1.04914	1.03775	1.21966	1.11989	1.00943	1.08593	1.04898	1.04899	0.0195849				8.47789	1.24739	1.06566	1.20055	1.25192	1.15062	1.27162	1.29065	1.17166	1.20626	0.0264796
	9.97522	1.24041	1.00862	1.0442	1.07902	1.09215	1.05778	1.17564	1.05271	1.08113	1.08804	1.13163	1.05575	1.104	1.18029	1.09938	0.0167947			6.47533	1.02464	1.01228	1.06823	1.00193	1.02627	1.05843	1.02593	1.22764	1.09757	1.0244	1.07713	1.03584	1.05669	0.0175805				8.97789	1.24953	1.06234	1.20083	1.26354	1.15976	1.27129	1.29118	1.17943	1.20974	0.0267663
	10.4752	1.23205	1.02335	1.0396	1.0607	1.08359	1.05101	1.15909	1.0552	1.08981	1.05992	1.12126	1.06923	1.10503	1.17077	1.09433	0.0156126			6.97533	1.0206	1.01075	1.05288	0.98991	1.02646	1.07591	1.03481	1.22535	1.07602	1.01479	1.09626	1.03638	1.05501	0.0178737				9.47789	1.24939	1.06639	1.20064	1.27159	1.16839	1.27384	1.29732	1.16464	1.21153	0.0272311
	10.9752	1.24484	1.01743	1.03934	1.07654	1.07209	1.06166	1.14764	1.04938	1.07732	1.05594	1.10199	1.04279	1.10011	1.16529	1.08945	0.0161629			7.47533	1.02627	1.00436	1.06703	1.0045	1.02394	1.04994	1.02476	1.19548	1.05523	1.03062	1.09516	1.03538	1.05106	0.0151086				9.97789	1.24894	1.06231	1.20065	1.27839	1.17158	1.27043	1.30189	1.17945	1.21421	0.0275345
	11.4752	1.22941	1.01738	1.02831	1.05741	1.06679	1.03171	1.135	1.04069	1.09579	1.05302	1.10663	1.0493	1.08867	1.15603	1.08258	0.0157058			7.97533	1.04155	0.998374	1.04779	0.9978	1.01442	1.0532	1.03315	1.20749	1.05635	1.01124	1.09797	1.02901	1.04903	0.0165378				10.4779	1.2473	1.06326	1.19779	1.28164	1.17361	1.26702	1.2953	1.1716	1.21219	0.0272208
	11.9752	1.21183	1.01423	1.03806	1.06356	1.07853	1.03036	1.12216	1.04765	1.08403	1.06911	1.12441	1.04176	1.08763	1.1506	1.08314	0.0143539			8.47533	1.04137	0.988893	1.05347	0.987978	1.01069	1.04371	1.02326	1.16825	1.03609	1.01891	1.09326	1.01503	1.04008	0.0143078				10.9779	1.25249	1.06845	1.19772	1.28623	1.17385	1.26815	1.29939	1.19174	1.21725	0.0268577
	12.4752	1.20511	1.01222	1.01674	1.04763	1.05004	1.03119	1.10257	1.05516	1.09858	1.07972	1.11623	1.03815	1.08626	1.14508	1.07748	0.0143155			8.97533	1.02721	0.99132	1.04122	1.00199	1.00263	1.03771	1.02901	1.15932	1.02814	1.01691	1.09294	1.02062	1.03742	0.0133463				11.4779	1.25487	1.07379	1.19824	1.28388	1.17375	1.26804	1.2945	1.22329	1.2213	0.0257535
	12.9752	1.20206	1.01264	1.02258	1.06093	1.05787	1.0342	1.09735	1.05468	1.0582	1.04349	1.11125	1.02312	1.08133	1.14215	1.07156	0.0139689			9.47533	1.04711	0.999339	1.05539	1.00537	1.01148	1.04437	1.04916	1.15516	1.02786	1.02428	1.08618	1.00864	1.04286	0.0125322				11.9779	1.25188	1.06983	1.20241	1.28753	1.1764	1.26825	1.29875	1.18039	1.21693	0.0268459
	13.4752	1.18915	1.00897	1.01313	1.05051	1.04726	1.03854	1.08975	1.05271	1.09218	1.07757	1.11027	1.02217	1.08351	1.14757	1.07309	0.0137194			9.97533	1.02137	0.987607	1.05476	0.995394	1.0162	1.02406	1.0357	1.16047	1.01632	1.00163	1.0812	1.01143	1.03385	0.0136917				12.4779	1.25258	1.06973	1.20336	1.29045	1.17383	1.2657	1.29049	1.13837	1.21056	0.0280383
	13.9752	1.19854	1.00652	1.00667	1.04253	1.04527	1.03549	1.07751	1.04417	1.08271	1.07583	1.10807	1.03324	1.07616	1.14746	1.07001	0.0142346			10.4753	1.02357	0.981359	1.05284	0.992252	1.01815	1.03221	1.02454	1.12681	1.01611	0.998379	1.10062	1.00534	1.03102	0.0125155				12.9779	1.25012	1.06779	1.20226	1.28804	1.17357	1.27025	1.29521	1.14088	1.21102	0.0283386
	14.4752	1.19028	1.01085	1.00764	1.05161	1.04305	1.03605	1.05628	1.03083	1.0584	1.05835	1.10446	1.02047	1.07955	1.15111	1.06421	0.0140458			10.9753	1.04152	0.985563	1.0564	1.00672	1.01173	1.03277	1.04383	1.12343	1.00631	1.01027	1.1066	1.00989	1.03625	0.012111				13.4779	1.24927	1.06455	1.20237	1.28976	1.17199	1.26949	1.29256	1.16532	1.21317	0.0276564
	14.9752	1.15759	1.01756	1.0136	1.05372	1.03527	1.02067	1.05356	1.02823	1.08109	1.06449	1.10187	1.02432	1.08113	1.1588	1.06371	0.0128882			11.4753	1.04182	0.999265	1.05442	1.01186	1.00808	1.04321	1.02929	1.12952	1.00861	0.996681	1.10379	1.00793	1.03621	0.0121875				13.9779	1.25254	1.06374	1.20221	1.28976	1.17319	1.27029	1.29814	1.18437	1.21678	0.0276047
	15.4752	1.14135	1.0213	1.02499	1.0452	1.04029	1.01719	1.04462	1.02808	1.06634	1.03621	1.07738	1.01695	1.08262	1.15562	1.05701	0.0117968			11.9753	1.03885	0.987008	1.05323	1.01666	1.01194	1.04322	1.03773	1.11696	1.01856	1.00413	1.0934	1.0067	1.0357	0.0109198				14.4779	1.24725	1.06103	1.20358	1.28783	1.17128	1.27158	1.29505	1.12881	1.2083	0.0295119
	15.9752	1.17413	1.02084	1.01185	1.03914	1.04018	1.01403	1.03545	1.0401	1.06767	1.05791	1.09788	1.01544	1.08095	1.15534	1.06078	0.0136316			12.4753	1.03826	0.987122	1.05729	1.01056	1.00968	1.03771	1.01891	1.09524	1.00155	0.994689	1.08638	0.984139	1.02679	0.0106938				14.9779	1.24862	1.06658	1.20324	1.28671	1.17068	1.27036	1.29358	1.17096	1.21384	0.0272463
	16.4752	1.16576	1.01459	1.01606	1.03568	1.03869	1.00877	1.025	1.03498	1.08856	1.04434	1.09151	1.01245	1.08185	1.15757	1.05827	0.0138617			12.9753	1.02309	0.984428	1.02606	0.986994	1.00688	1.03131	1.04059	1.10831	0.996968	1.01107	1.087	0.988162	1.02424	0.0112887				15.4779	1.25016	1.06695	1.2029	1.2874	1.17129	1.27062	1.29389	1.11948	1.20784	0.0294242
	16.9752	1.17689	1.01637	1.018	1.0318	1.033	1.01784	1.03142	1.03945	1.06533	1.06366	1.09512	0.997625	1.07792	1.16404	1.05918	0.0144823			13.4753	1.02077	0.972133	1.0535	1.00254	0.991971	1.05135	1.05756	1.09867	1.01024	1.0191	1.09534	1.0004	1.03113	0.0115981				15.9779	1.24934	1.06484	1.20286	1.28712	1.16817	1.2696	1.29449	1.1905	1.21587	0.0271113
	17.4752	1.15354	1.01095	1.00424	1.0434	1.02998	1.00411	1.01658	1.04121	1.06201	1.07621	1.09647	1.0117	1.08426	1.16517	1.05713	0.0141163			13.9753	1.01625	0.967637	1.03275	1.00218	0.995962	1.00774	1.02678	1.06751	1.00363	0.99318	1.10055	0.989084	1.01694	0.0105122				16.4779	1.24425	1.069	1.19989	1.28692	1.16899	1.26936	1.29364	1.18398	1.2145	0.0266559
	17.9752	1.17428	1.01131	1.01044	1.04742	1.0265	1.02276	1.01811	1.02126	1.02536	1.05232	1.09592	1.00794	1.07889	1.16817	1.05433	0.0149499			14.4753	1.02479	0.974886	1.04265	0.999997	1.00057	1.03176	1.03438	1.09024	1.00385	1.00059	1.08766	0.985152	1.02304	0.0106409				16.9779	1.24845	1.06808	1.20127	1.28485	1.17025	1.26732	1.28816	1.18488	1.21416	0.0263106
	18.4752	1.18431	1.01741	1.0068	1.03955	1.02368	0.999377	1.01233	1.01548	1.0258	1.03497	1.07466	0.999722	1.0808	1.17112	1.049	0.0159835			14.9753	1.02035	0.974491	1.04084	1.00636	0.998532	1.01357	1.0459	1.06272	0.996326	0.99764	1.08923	0.988053	1.0195	0.00975488				17.4779	1.24922	1.06311	1.20028	1.28517	1.16736	1.2659	1.29271	1.17017	1.21174	0.0274533
	18.9752	1.1717	1.01239	0.995775	1.02795	1.01786	1.00389	1.00775	1.04223	1.06461	1.0829	1.08866	1.00694	1.08779	1.17437	1.05606	0.0158435																					17.9779	1.24434	1.06331	1.20554	1.28442	1.16869	1.2673	1.29371	1.19183	1.21489	0.0268568
	19.4752	1.1842	1.01488	1.00581	1.04033	1.02965	1.01358	1.01249	1.03853	1.0569	1.05667	1.08087	1.00998	1.0951	1.17777	1.05834	0.0156542																					18.4779	1.23988	1.05936	1.20254	1.28374	1.16794	1.2631	1.28935	1.2056	1.21394	0.0266792
	19.9752	1.16041	1.01265	0.99964	1.04972	1.02838	0.995757	1.01162	1.03984	1.04106	1.07257	1.08769	1.00643	1.08763	1.18037	1.05527	0.0153784																					18.9779	1.24465	1.06127	1.20144	1.28315	1.1677	1.26409	1.29078	1.20499	1.21476	0.026669
	20.4752	1.16941	1.01049	0.992777	1.02986	1.02175	0.993317	0.998086	1.01181	1.03125	1.05206	1.06396	0.99768	1.08961	1.17694	1.04564	0.0163025																					19.4779	1.23737	1.05365	1.20264	1.28137	1.16519	1.26214	1.28967	1.18475	1.2096	0.0274033
																																						19.9779	1.2368	1.05269	1.20197	1.27962	1.16496	1.26174	1.28629	1.18405	1.20851	0.0272414
																																						20.4779	1.24055	1.0501	1.20083	1.28318	1.16664	1.26322	1.28589	1.17114	1.20769	0.0279917
	MAX	1.42849	1.02558	1.17108	1.338	1.34731	1.15978	1.42408	1.09589	1.11775	1.10173	1.24986	1.15567	1.41458	1.49653	1.233	0.03919			MAX	1.07144	1.05482	1.10033	1.03745	1.08898	1.10033	1.10872	1.22818	1.21491	1.08765	1.17545	1.1241	1.116	0.0174				20.9779	1.23862	1.05411	1.19953	1.28005	1.16446	1.2595	1.28162	1.15462	1.20406	0.0275742
																1.254	0.04554	Rap1A-FLARE only															1.26	0.03403	Rap1B-FLARE only			21.4779	1.23311	1.05208	1.19636	1.27904	1.16522	1.25921	1.28383	1.15976	1.20357	0.0275469
																																						21.9779	1.2348	1.05045	1.19971	1.28	1.16362	1.25884	1.28016	1.13739	1.20062	0.0283803
																																						22.4779	1.23957	1.05355	1.19725	1.27818	1.1636	1.25888	1.27954	1.10891	1.19743	0.029429
																		Unpaired t test																	Unpaired t test			22.9779	1.23595	1.05954	1.19646	1.27692	1.16321	1.25674	1.27817	1.2269	1.21173	0.0257933
																		P value	0.7329																P value	0.0006		23.4779	1.238	1.06071	1.19498	1.27918	1.16314	1.25597	1.27886	1.13428	1.20064	0.0274401
																		P value summary	ns																P value summary	***		23.9779	1.23464	1.05749	1.19513	1.27568	1.16282	1.25232	1.27643	1.16557	1.20251	0.0261714
																		Significantly different (P < 0.05)?	No																Significantly different (P < 0.05)?	Yes		24.4779	1.22956	1.05552	1.19394	1.27435	1.16328	1.2539	1.27377	1.16471	1.20113	0.0261329
																		One- or two-tailed P value?	Two-tailed																One- or two-tailed P value?	Two-tailed		24.9779	1.23465	1.04841	1.19309	1.27316	1.16179	1.25111	1.26956	1.16833	1.20001	0.0265571
																		t, df	t=0.3457 df=22																t, df	t=4.132 df=18		25.4779	1.22736	1.04664	1.19091	1.27046	1.16291	1.2505	1.26992	1.16479	1.19794	0.0265033
																																						25.9779	1.22847	1.04639	1.19122	1.2724	1.16018	1.24679	1.26945	1.16032	1.1969	0.0266665
																		How big is the difference?																	How big is the difference?			26.4779	1.22828	1.04866	1.19001	1.27176	1.16136	1.24686	1.26772	1.1722	1.19836	0.0260415
																		Mean ± SEM of column A	1.254 ± 0.04554, n=11																Mean ± SEM of column A	1.26 ± 0.03403, n=8		26.9779	1.22818	1.04878	1.18962	1.2711	1.16163	1.24374	1.26715	1.12469	1.19186	0.0273404
																		Mean ± SEM of column B	1.233 ± 0.03919, n=13																Mean ± SEM of column B	1.116 ± 0.0174, n=12		27.4779	1.22768	1.04875	1.1858	1.26903	1.15793	1.24759	1.26508	1.14857	1.1938	0.0264637
																		Difference between means	-0.02065 ± 0.05974																Difference between means	-0.1439 ± 0.03483		27.9779	1.2217	1.04743	1.18728	1.26813	1.16067	1.24701	1.26516	1.17791	1.19691	0.0256928
																		95% confidence interval	-0.1445 to 0.1032																95% confidence interval	-0.2171 to -0.07073		28.4779	1.22912	1.04793	1.18452	1.26734	1.1604	1.24297	1.26332	1.15222	1.19348	0.0260884
																		R squared (eta squared)	0.005402																R squared (eta squared)	0.4868		28.9779	1.21982	1.04769	1.18463	1.26731	1.16035	1.24122	1.26092	1.16343	1.19317	0.0254619
																																						29.4779	1.22455	1.04243	1.18522	1.26389	1.15868	1.23883	1.26079	1.09098	1.18317	0.0287421
																		F test to compare variances																	F test to compare variances			29.9779	1.22268	1.04181	1.18439	1.2635	1.15886	1.23852	1.25761	1.11725	1.18558	0.0272205
																		F, DFn, Dfd	1.143, 10, 12																F, DFn, Dfd	2.551, 7, 11		30.4779	1.22256	1.0401	1.18203	1.26235	1.15679	1.23697	1.26085	1.11616	1.18473	0.0275121
																		P value	0.8146																P value	0.1598		30.9779	1.21838	1.03593	1.17776	1.26133	1.15574	1.23504	1.25402	1.14837	1.18582	0.0262792
																		P value summary	ns																P value summary	ns		31.4779	1.21802	1.03286	1.18084	1.25745	1.15508	1.2359	1.25966	1.12437	1.18302	0.0274542
																		Significantly different (P < 0.05)?	No																Significantly different (P < 0.05)?	No		31.9779	1.22192	1.03851	1.17974	1.25835	1.1567	1.22945	1.25135	1.14439	1.18505	0.0257253
																																						32.4779	1.21314	1.03059	1.1783	1.25605	1.1545	1.22853	1.24911	1.14554	1.18197	0.0260991
																																						32.9779	1.21477	1.02944	1.17355	1.25802	1.15356	1.22964	1.24835	1.12663	1.17924	0.0269541
																																						33.4779	1.21491	1.02683	1.17432	1.25645	1.1531	1.22463	1.24544	1.15094	1.18083	0.0261842
																																						33.9779	1.21063	1.02451	1.17175	1.25418	1.15089	1.2221	1.24476	1.15659	1.17943	0.0260652
																																						34.4779	1.21299	1.02282	1.16834	1.25163	1.15069	1.22317	1.24788	1.12039	1.17474	0.0272957
																																						34.9779	1.21536	1.02422	1.16917	1.25372	1.14944	1.22243	1.24185	1.14582	1.17775	0.0263072
																																						35.4779	1.21813	1.02068	1.17033	1.24934	1.15179	1.2215	1.23798	1.14585	1.17695	0.0262913
																																						35.9779	1.20416	1.01917	1.1688	1.24882	1.14799	1.2175	1.23763	1.14135	1.17318	0.026113
																																						36.4779	1.21323	1.02004	1.16586	1.24972	1.14783	1.21902	1.23582	1.12157	1.17164	0.0268192
																																						36.9779	1.20866	1.01777	1.1654	1.24646	1.14559	1.22093	1.23853	1.13327	1.17207	0.0266383
																																						37.4779	1.20458	1.01501	1.16427	1.24549	1.14502	1.21402	1.23161	1.12513	1.16814	0.0264892
																																						37.9779	1.20609	1.01307	1.16122	1.2451	1.14537	1.20928	1.22688	1.11748	1.16556	0.0266026
																																						38.4779	1.20573	1.01522	1.16346	1.24531	1.14517	1.21338	1.22798	1.16562	1.17273	0.0256236
																																						38.9779	1.20211	1.01374	1.16072	1.23991	1.14373	1.2082	1.22502	1.11366	1.16339	0.0261937
																																						39.4779	1.20512	1.01179	1.16093	1.24277	1.14346	1.2102	1.22496	1.10102	1.16253	0.027155
																																						39.9779	1.20048	1.01254	1.16239	1.24005	1.14053	1.20503	1.22405	1.1215	1.16332	0.0259459
																																						40.4779	1.20003	1.01016	1.16191	1.23823	1.14046	1.20735	1.22286	1.11504	1.162	0.0263027
																																						MAX	1.25487	1.07379	1.20554	1.29045	1.1764	1.27384	1.30189	1.2269	1.225	0.02642
																																															1.243	0.008414	pmEKAR4 only

## Sheet: Figure 3 - Supplement 6
		pmEKAR4 + HRasN17																											cytoEKAR4 + HRasN17
	Time (min)	Cell 1	Cell 2	Cell 3	Cell 4	Cell 5	Cell 6	Cell 7	Cell 8	Cell 9	Cell 10	Cell 11	Cell 12	Cell 13	Cell 14	Cell 15	Cell 16	Cell 17	Cell 18	Cell 19	Cell 20	Cell 21	AVERAGE	SEM				Time (Min)	Cell1	Cell2	Cell3	Cell4	Cell5	Cell6	Cell7	Cell8	Cell9	Cell10	Cell11	Cell12	Cell13	Cell14	Cell15	Cell16	Cell17	Cell18	Cell19	Cell20	Cell21
	-4.06807	0.991101	0.990822	0.989973	0.995597	0.976767	0.98859	1.00702	0.996458	0.985556	1.00402	1.00642	0.996265	0.998421	0.988339	0.995116	1.0115	0.991641	1.00106	1.0098	0.99694	0.996417	0.996087	0.00186288				-4.55872	0.974016	0.977949	0.99641	0.988635	0.979201	0.962299	0.976049	0.982162	0.950098	0.941194	0.946048	0.955862	0.974211	0.978209	1.00428	1.00707	1.02458	0.986245	1.00835	1.01633	1.01385
	-3.56807	0.993974	0.994326	0.993718	0.998767	0.981719	0.984019	1.00175	0.994484	0.981288	1.00193	1.00391	0.997961	0.999257	0.989385	1.00023	1.01167	0.992805	1.00005	1.00986	0.996785	0.997673	0.996455	0.00172948				-4.05872	0.98389	0.978165	0.99786	0.997382	0.988757	0.968602	0.979862	0.988095	0.956212	0.942855	0.9425	0.969231	0.974143	0.983322	1.01182	1.0107	1.03109	1.00069	1.01567	1.02028	1.01948
	-3.06807	0.990142	0.992743	0.996391	1.00212	0.998675	0.994646	1.00393	1.00253	0.984722	0.997219	1.00223	0.994318	0.996328	0.985723	0.993579	1.0097	0.992724	1.00172	1.0086	0.999885	0.997488	0.9974	0.00141838				-3.55872	0.965078	0.975305	0.983453	0.977313	0.96711	0.956764	0.964842	0.971403	0.95297	0.951649	0.956318	0.966043	0.973865	0.979525	0.998534	0.999633	1.02131	0.986055	1.00533	1.01011	1.00766
	-2.56807	0.992876	0.993456	0.999319	1.00127	1.0002	0.990876	1.00072	0.995204	0.9891	1.00132	0.999843	0.997424	0.997283	0.986663	0.992443	1.00858	0.991985	1.00398	1.01043	0.998872	0.997906	0.997607	0.00130934				-3.05872	0.989057	0.986855	1.00546	0.995502	0.993179	0.974158	0.984133	0.992272	0.958104	0.947279	0.955126	0.96647	0.971102	0.976364	1.00976	0.997641	1.01739	0.991497	1.00353	1.01017	1.01014
	-2.06807	0.997192	0.994404	0.993904	0.998864	0.993528	0.998129	1.00406	0.999934	0.992994	0.99769	0.999204	0.999929	0.995819	0.986588	0.994461	1.00737	0.993898	1.00375	1.00362	1.00022	1.00038	0.997902	0.00103403				-2.55872	0.980203	0.973648	0.986912	0.991112	0.983404	0.977543	0.983026	0.987381	0.96908	0.969614	0.973327	0.974963	0.977296	0.98088	1.01976	1.01029	1.02827	1.00237	1.01363	1.01568	1.01453
	-1.56807	1.00017	0.998743	0.993056	1.00042	0.991635	0.995081	1.00349	0.999865	0.995746	0.998256	1.00143	1.0019	1.0003	0.992153	0.996862	1.00609	0.997449	1.00175	1.00309	0.999597	0.999049	0.998864	0.000823554				-2.05872	0.995656	0.99148	1.00478	1.0011	0.990839	0.989182	0.991705	0.993508	0.983707	0.975565	0.983964	0.992934	0.99045	1.0029	1.0232	1.01182	1.02415	1.00693	1.0186	1.01866	1.01895
	-1.06807	1.00248	0.997324	0.99343	1.00047	0.995673	0.994857	1.00136	0.996567	0.998632	1.00114	0.998228	1.00663	0.999277	0.997694	1.00009	1.00529	0.999818	1.00394	1.00226	1.00364	1.00138	1.00001	0.000748642				-1.55872	0.980675	0.97409	0.989084	0.982086	0.979405	0.978312	0.976871	0.983691	0.996935	0.992142	0.985145	0.994254	1.00071	1.00824	1.0206	1.01447	1.02976	1.00801	1.0185	1.01743	1.02038
	-0.56104		0.998984	0.992964	1.00097	1.00406	0.995769	0.999861	1.00252	0.989877	1.00198	1.00136	1.0054	1.00272	1.00039	0.997828	1.0047	0.998104	1.00214	1.00502	1.00105	0.999791	1.00027	0.000883991				-1.05872	0.975344	0.986629	0.995985	0.9904	0.988636	0.988362	0.987235	0.988442	0.987864	0.986597	0.987859	0.985416	0.992069	0.997883	1.01673	1.01493	1.01852	1.0091	1.01794	1.01668	1.01447
EGF Addition	0	1	1	1	1	1	1	1	1	1	1	1	1	1	1	1	1	1	1	1	1	1	1	0			EGF Addition	0	1	1	1	1	1	1	1	1	1	1	1	1	1	1	1	1	1	1	1	1	1
	0.486958	0.998222	0.996633	1.00594	0.997945	1.00472	1.02201	1.0062	1.00638	1.00817							0.99786	0.995714	0.997433	0.999719	0.995264	0.998605	1.00205	0.00182205				0.474056	0.998084	0.972327	0.993446	0.99527	0.991007	1.00959	0.986726	0.996759	1.01988	1.01629	1.02628	1.02129	1.01801	1.0304	1.0113	1.00105	1.00602	1.00402	1.00611	1.00443	0.993049
	0.986958	0.994684	0.999797	1.00701	1	1.00529	1.0143	1.00732	1.00675	1.0145							0.997106	0.99679	0.992952	0.998399	0.997406	0.996677	1.00193	0.00176201				0.974056	1.01162	1.0017	1.01216	1.00435	1.00455	1.02185	1.00255	1.01077	1.00248	0.996072	1.00519	0.994376	0.986686	0.995361	0.991975	0.981128	0.992012	0.992156	0.995949	0.990918	0.97701
	1.48696	0.994998	0.999566	1.01071	1.00269	0.999009	1.02048	1.00811	1.00694	1.01226							0.994056	0.998619	0.993678	1.00035	0.997214	0.997742	1.00243	0.00199217				1.47406	0.993836	0.988454	0.994509	0.982834	0.980934	1.00651	0.98276	0.992886	0.998657	0.997865	0.999722	0.989394	0.989834	0.990639	1.01805	1.00881	1.0098	1.03114	1.01801	1.01588	1.00762
	1.9955	1.00693	0.998153	1.00574	0.99896	1.00674	1.01528	1.00489	1.00292	1.01632	1.03249	1.02894	1.04133	1.0088	1.02927	0.981468	0.993101	1.00187	0.995962	0.999604	0.996669	0.997538	1.00776	0.00322278				1.97406	1.01102	1.00844	1.00593	1.00066	1.00226	1.03088	1.00498	1.00778	1.00145	1.00401	1.00622	0.989572	0.981036	0.98275	1.0239	1.00085	0.999885	1.02647	1.00913	1.00643	0.998258
	2.4955	1.00948	0.998911	1.00631	1.00181	1.01184	1.01871	1.00352	1.00385	1.02408	1.03691	1.0315	1.04921	1.01543	1.04154	1.00063	0.995111	1.00241	0.995805	1.00031	1.00008	0.999738	1.01177	0.00348805				2.47406	0.992085	0.992684	0.990297	0.981292	0.984989	1.0119	0.985201	0.994366	1.02923	1.0231	1.02852	1.0102	1.00765	1.01298	1.03756	1.02721	1.02212	1.05444	1.02823	1.02806	1.01501
	2.9955	1.01226	1.00108	1.00516	1.00177	1.01404	1.00664	0.999854	1.00589	1.01495	1.03625	1.02851	1.05091	1.01632	1.04122	0.998908	0.995544	1.00614	0.99685	0.999346	1.00133	0.999337	1.01106	0.00340381				2.97406	1.00573	1.00251	1.00232	0.990762	1.00418	1.02965	1.00219	1.00771	1.01651	1.01448	1.0131	0.994251	0.988364	0.982607	1.02743	1.01314	0.999542	1.05646	1.02183	1.01937	1.01344
	3.4955	1.0151	1.00056	1.01008	1.00333	1.01111	1.01803	1.00097	1.00588	1.02343	1.03694	1.0285	1.04738	1.01958	1.04263	1.00386	0.991847	1.00668	0.998036	1.00192	1.00258	1.00042	1.0128	0.00334324				3.47406	1.00667	1.0135	1.00953	0.98798	1.00653	1.0345	1.006	1.00908	1.01629	1.01446	1.02138	1.00208	0.99238	0.993302	1.01788	1.00229	0.994865	1.05143	1.01697	1.01076	0.997068
	3.9955	1.01233	1.00196	1.00913	1.00138	1.01336	1.02907	1.00172	1.00607	1.02255	1.03982	1.03127	1.05273	1.02254	1.04903	1.00072	0.989867	1.00984	0.998658	0.99749	1.00517	1.0021	1.01413	0.00381513				3.97406	1.0176	1.02075	1.00846	0.990389	1.0139	1.04715	1.00985	1.01418	1.02297	1.02099	1.02626	1.00119	0.989903	0.985751	1.03404	1.01484	1.00374	1.08185	1.02952	1.02793	1.01624
	4.4955	1.01372	1.00134	1.01149	1.00551	1.01553	1.02107	1.00431	1.00727	1.02335	1.0414	1.03112	1.05347	1.02057	1.04851	1.00745	0.990683	1.01279	0.999461	0.996487	1.00483	1.00051	1.0148	0.00368766				4.47406	1.01476	1.01172	1.01019	0.988767	1.01599	1.0443	1.00499	1.01043	1.03865	1.03475	1.05167	1.01587	1.01065	1.01171	1.02335	0.997128	0.988886	1.06641	1.00544	1.00927	0.986969
	4.9955	1.01511	1.00397	1.01045	1.0059	1.01948	1.02182	1.00865	1.0053	1.03099	1.03554	1.02809	1.05524	1.02381	1.04974	1.0127	0.9913	1.01613	1.00046	0.998328	1.0057	1.00053	1.01615	0.00362024				4.97406	1.02385	1.02354	1.02158	0.994847	1.01941	1.05912	1.01302	1.01988	1.04562	1.04627	1.05711	1.02829	1.028	1.02304	1.0124	0.998392	0.981054	1.06691	1.00686	1.01117	0.989984
	5.4955	1.01429	1.00487	1.01493	1.00799	1.01334	1.02668	1.02148	1.01071	1.0318	1.04353	1.03053	1.05707	1.02646	1.05642	1.017	0.992233	1.01581	1.00157	0.998719	1.00774	1.00206	1.01882	0.00383847				5.47406	1.00559	1.00584	0.994536	0.964251	0.998698	1.03644	0.991524	1.00131	1.04605	1.0403	1.05815	1.03232	1.02391	1.0194	1.06289	1.03397	1.00141	1.11125	1.03496	1.04281	1.02436
	5.9955	1.01738	1.00322	1.00931	1.00979	1.01282	1.0278	1.02756	1.00864	1.03061	1.04271	1.02621	1.06131	1.02845	1.05524	1.01757	0.98996	1.01377	1.00343	1.00053	1.00842	1.00441	1.01901	0.00391834				5.97406	1.02283	1.02599	1.01342	0.981823	1.02232	1.05934	1.00923	1.01796	1.055	1.05123	1.07131	1.03105	1.03299	1.02288	1.05598	1.02663	0.995496	1.12208	1.03725	1.04161	1.01848
	6.4955	1.01977	1.00759	1.0087	1.00982	1.01666	1.03273	1.05082	1.01297	1.03288	1.04733	1.02907	1.06179	1.02859	1.0564	1.01781	0.991719	1.01354	1.00191	0.999751	1.01154	1.00497	1.02173	0.00423031				6.47406	1.01814	1.02506	1.00975	0.978241	1.0148	1.06395	1.00744	1.01546	1.05345	1.04834	1.06774	1.03137	1.02685	1.02067	1.02761	0.999578	0.974396	1.08693	1.00978	1.01682	0.98404
	6.9955	1.01708	1.00664	1.00821	1.00971	1.01749	1.03457	1.05551	1.01075	1.03255	1.04619	1.03018	1.06716	1.03437	1.0608	1.01641	0.989222	1.01937	1.00524	1.00016	1.01141	1.00494	1.02276	0.0045648				6.97406	1.03515	1.04239	1.01507	0.980982	1.02756	1.07168	1.01687	1.02613	1.0398	1.03272	1.05359	1.00951	1.01651	1.00651	1.04353	1.00752	0.976391	1.09836	1.01795	1.02512	0.997283
	7.4955	1.02071	1.00883	1.01097	1.01288	1.01197	1.03174	1.07128	1.0157	1.03143	1.04885	1.02891	1.06722	1.03567	1.05787	1.01186	0.987645	1.01846	1.00527	1.00221	1.00988	1.00423	1.0235	0.00483102				7.47406	1.01305	1.01841	1.00422	0.964726	1.00791	1.06121	0.998798	1.01277	1.04052	1.02959	1.0568	1.00818	1.01251	1.00668	1.06896	1.03224	0.993983	1.13326	1.0348	1.04833	1.02212
	7.9955	1.02357	1.00764	1.00774	1.00951	1.01149	1.03378	1.08396	1.01965	1.03924	1.043	1.0279	1.06721	1.03265	1.05878	1.00052	0.986768	1.01578	1.00369	0.9992	1.01066	1.00636	1.02329	0.00531834				7.97406	1.03193	1.03674	1.01559	0.980961	1.03334	1.0837	1.01763	1.03092	1.04786	1.02968	1.0728	1.02254	1.03102	1.02994	1.06981	1.02971	0.996835	1.12301	1.03952	1.05007	1.01637
	8.4955	1.02194	1.00926	1.0092	1.01312	1.00897	1.04555	1.08821	1.01944	1.04364	1.04936	1.0289	1.07129	1.03372	1.06323	1.01342	0.984389	1.01937	1.00599	1.00128	1.01239	1.00522	1.02609	0.00561735				8.47406	1.03827	1.04756	1.02495	0.98551	1.03703	1.09322	1.02411	1.03933	1.05866	1.04124	1.08146	1.0327	1.04123	1.03229	1.08279	1.04013	0.993451	1.13453	1.04052	1.05764	1.02311
	8.9955	1.02415	1.00932	1.00827	1.01165	1.00403	1.03431	1.09704	1.02708	1.04398	1.04937	1.02858	1.07407	1.03651	1.06664	1.00794	0.986278	1.01833	1.00479	1.00244	1.01327	1.00543	1.02636	0.00595621				8.97406	1.01702	1.0236	1.00107	0.960101	1.0039	1.07153	0.993638	1.01238	1.03852	1.02369	1.05866	1.01008	1.02163	1.01606	1.07333	1.03355	0.98026	1.12516	1.03304	1.05133	1.02223
	9.4955	1.02762	1.00903	1.00701	1.01069	1.00659	1.03632	1.09879	1.02895	1.04839	1.04528	1.0271	1.07136	1.03447	1.06168	1.00969	0.987876	1.02094	1.0089	1.00154	1.01411	1.00499	1.02673	0.00580643				9.47406	1.02344	1.0448	1.01825	0.970954	1.02573	1.0943	1.0178	1.03457	1.05771	1.03428	1.06626	1.01836	1.02956	1.01907	1.04898	1.02605	0.967574	1.11297	1.03144	1.0457	1.01449
	9.9955	1.02828	1.01173	1.00698	1.00872	1.00454	1.02865	1.1	1.03015	1.04751	1.04991	1.02992	1.07928	1.03707	1.06449	1.01498	0.987205	1.02157	1.00746	1.00404	1.01432	1.00479	1.0277	0.00603952				9.97406	1.03767	1.05799	1.0184	0.978599	1.03852	1.09744	1.02065	1.04135	1.05124	1.0356	1.06497	1.01484	1.026	1.01926	1.06283	1.02204	0.971541	1.1068	1.03014	1.04492	1.00973
	10.4955	1.02744	1.01377	1.009	1.01116	1.00914	1.04318	1.1008	1.03279	1.04371	1.04875	1.03014	1.07657	1.04195	1.0655	1.01662	0.984248	1.02856	1.00691	1.00149	1.01477	1.00302	1.02902	0.00604861				10.4741	1.02216	1.05257	1.00875	0.961562	1.01849	1.08846	1.00626	1.02798	1.05166	1.03413	1.07373	1.0179	1.02104	1.01291	1.09939	1.04561	0.986716	1.12986	1.0522	1.06836	1.03164
	10.9955	1.02884	1.01408	1.01362	1.01199	1.00806	1.03871	1.10404	1.03394	1.03797	1.05144	1.03082	1.0792	1.04303	1.06909	1.01375	0.983492	1.02716	1.00787	1.00213	1.01504	1.00609	1.02954	0.00617932				10.9741	1.0312	1.05573	1.02005	0.966035	1.02938	1.09347	1.01475	1.03765	1.05313	1.03445	1.06615	1.01313	1.02823	1.01731	1.07856	1.01846	0.969944	1.10922	1.036	1.05468	1.0164
	11.4955	1.03349	1.01299	1.00733	1.0096	1.00773	1.03804	1.10629	1.03565	1.04411	1.05006	1.02964	1.08141	1.045	1.06826	1.01739	0.984834	1.02657	1.0054	1.00236	1.01956	1.00353	1.02996	0.00635615				11.4741	1.03511	1.0642	1.02928	0.974157	1.03852	1.11282	1.02543	1.05061	1.04319	1.02629	1.05641	0.999222	1.0107	0.999678	1.10674	1.05007	0.987456	1.12305	1.05354	1.07103	1.02989
	11.9955	1.03447	1.01871	1.01222	1.01938	1.01258	1.03767	1.10795	1.03791	1.04379	1.05406	1.0294	1.08064	1.04649	1.06635	1.01982	0.984362	1.02438	1.00918	1.00387	1.01974	1.00595	1.03185	0.00616238				11.9741	1.02596	1.06406	1.01802	0.958365	1.03133	1.10443	1.01671	1.04501	1.05939	1.04111	1.07449	1.01558	1.02864	1.01744	1.07184	1.01546	0.964141	1.08956	1.03221	1.05692	1.00762
	12.4955	1.03515	1.01743	1.00921	1.01424	1.01656	1.04645	1.10577	1.03588	1.04731	1.05656	1.03298	1.08658	1.04788	1.0746	1.01964	0.977232	1.02632	1.00938	1.00425	1.02179	1.00598	1.03291	0.00656031				12.4741	1.0493	1.07981	1.03767	0.976863	1.05266	1.11751	1.03117	1.05992	1.0629	1.05111	1.06391	1.0061	1.02869	1.02245	1.08388	1.03593	0.971412	1.10763	1.04866	1.07506	1.02747
	12.9955	1.03916	1.01643	1.00913	1.01635	1.01856	1.04096	1.1098	1.03655	1.0538	1.05513	1.03328	1.08789	1.04427	1.07527	1.01987	0.978606	1.02599	1.00841	1.0029	1.0193	1.00633	1.03324	0.00668699				12.9741	1.03817	1.07035	1.02085	0.962965	1.04554	1.11232	1.02863	1.0577	1.06873	1.06667	1.07625	1.02064	1.03689	1.03601	1.06582	1.00552	0.955566	1.06564	1.01793	1.04549	0.992156
	13.4955	1.04024	1.01576	1.00834	1.01646	1.01874	1.05043	1.10498	1.04036	1.04794	1.05388	1.0324	1.09131	1.04483	1.07055	1.01172	0.978259	1.03205	1.01251	1.00609	1.02355	1.00623	1.03365	0.00654177				13.4741	1.04903	1.08139	1.03069	0.968775	1.04862	1.12117	1.03245	1.06712	1.06664	1.05912	1.06339	1.00799	1.02866	1.02467	1.11742	1.04009	0.973951	1.09717	1.05159	1.07815	1.02594
	13.9955	1.04393	1.01565	1.00985	1.02033	1.01803	1.05999	1.11488	1.04418	1.05368	1.05483	1.0325	1.08898	1.04574	1.07101	1.01877	0.979068	1.0324	1.01086	1.00488	1.02147	1.00656	1.0356	0.00683615				13.9741	1.03977	1.08063	1.025	0.963217	1.04226	1.12127	1.02695	1.06634	1.06079	1.06241	1.07465	1.01158	1.02716	1.02593	1.08939	1.02356	0.956473	1.07645	1.03411	1.06842	1.01696
	14.4955	1.04133	1.01957	1.00916	1.02005	1.02182	1.05603	1.11812	1.04343	1.06129	1.05431	1.03413	1.09144	1.04888	1.07394	1.01863	0.979893	1.0344	1.0131	1.00367	1.0238	1.00564	1.03679	0.00697109				14.4741	1.05838	1.09258	1.03582	0.969224	1.05238	1.13145	1.04189	1.0762	1.03954	1.04568	1.03983	0.985878	1.00239	0.99313	1.10031	1.03415	0.96638	1.07949	1.04096	1.07555	1.01816
	14.9955	1.04331	1.01778	1.00823	1.01815	1.01995	1.05637	1.11404	1.04358	1.05067	1.05787	1.03337	1.09377	1.05102	1.07278	1.0232	0.980505	1.0405	1.0133	1.00776	1.02572	1.00844	1.03716	0.00678316				14.9741	1.02553	1.0773	1.01862	0.95	1.02921	1.10862	1.02503	1.06128	1.05564	1.05592	1.04973	0.989001	1.01346	1.0058	1.07496	1.01011	0.95611	1.05637	1.02659	1.0638	1.00143
	15.4955	1.04447	1.01986	1.00767	1.01868	1.01639	1.05802	1.11974	1.04962	1.05882	1.05767	1.03464	1.09296	1.04563	1.0761	1.01084	0.977965	1.03862	1.01151	1.00354	1.02427	1.00808	1.03691	0.00723786				15.4741	1.04086	1.07863	1.02841	0.957041	1.04109	1.12351	1.03856	1.07029	1.06074	1.0663	1.05236	1.00098	1.0163	1.02122	1.11042	1.04255	0.980239	1.07972	1.06038	1.09103	1.02852
	15.9955	1.04881	1.01952	1.00651	1.01618	1.01146	1.04677	1.11727	1.05048	1.06016	1.06048	1.03129	1.09876	1.04907	1.07476	1.01765	0.980413	1.04226	1.01313	1.00306	1.02559	1.00885	1.03726	0.00722642				15.9741	1.03184	1.07305	1.02193	0.949422	1.0309	1.1172	1.03272	1.06639	1.06781	1.07085	1.0596	0.996661	1.02488	1.02805	1.10559	1.03865	0.970319	1.07309	1.04727	1.08501	1.02619
	16.4955	1.05013	1.01935	1.00935	1.0199	1.01102	1.06326	1.12448	1.04964	1.06128	1.06264	1.03101	1.10081	1.04861	1.0764	1.01996	0.978935	1.04542	1.01276	0.999987	1.02384	1.00897	1.03894	0.00761105				16.4741	1.03992	1.10299	1.03912	0.960697	1.0523	1.13194	1.04978	1.08543	1.05627	1.07561	1.04394	0.996541	1.01871	1.01872	1.09022	1.02468	0.962835	1.05262	1.04064	1.07635	1.00758
	16.9955	1.05018	1.02171	1.00644	1.01866	1.01358	1.05402	1.12056	1.05151	1.06162	1.06339	1.0338	1.09903	1.05141	1.07749	1.01513	0.978464	1.05023	1.01315	1.00337	1.02433	1.00943	1.03893	0.00745429				16.9741	1.02788	1.08986	1.01856	0.951475	1.03609	1.12194	1.0373	1.07609	1.08111	1.08947	1.0565	1.01152	1.03042	1.03598	1.06397	1.00568	0.956548	1.02145	1.02253	1.06	0.99016
	17.4955	1.05053	1.02378	1.00787	1.02015	1.02337	1.05986	1.12343	1.05389	1.06587	1.06685	1.03847	1.1013	1.05395	1.08008	1.01904	0.980007	1.053	1.01467	1.00669	1.0266	1.01122	1.04194	0.00747452				17.4741	1.0332	1.0999	1.03876	0.953683	1.04333	1.12827	1.04857	1.08623	1.07998	1.09349	1.05684	1.0041	1.03415	1.04307	1.08526	1.01586	0.957714	1.03243	1.03502	1.07767	1.00485
	17.9955	1.05028	1.026	1.0107	1.02412	1.02452	1.05299	1.12251	1.05343	1.0608	1.06388	1.03715	1.09987	1.0531	1.07937	1.02251	0.980136	1.05718	1.01664	1.00526	1.02656	1.00972	1.04175	0.00725351				17.9741	1.04149	1.11625	1.03531	0.958112	1.05072	1.1358	1.05631	1.09659	1.05273	1.07291	1.03999	0.982765	1.00873	1.01603	1.129	1.05	0.982343	1.05331	1.06018	1.10184	1.02932
	18.4955	1.05184	1.02376	1.01401	1.02672	1.02615	1.06143	1.12699	1.05586	1.0658	1.06546	1.03327	1.10175	1.05056	1.07512	1.01398	0.97809	1.05854	1.0172	1.00259	1.02799	1.0089	1.04219	0.00756326				18.4741	1.05057	1.12254	1.05143	0.964508	1.06278	1.152	1.06364	1.10824	1.08653	1.09828	1.06062	1.01843	1.04577	1.05653	1.08005	1.00657	0.956766	1.00998	1.02449	1.06602	0.989144
	18.9955	1.05669	1.0258	1.01129	1.02671	1.02357	1.06586	1.12404	1.05553	1.06596	1.0689	1.03243	1.10445	1.05361	1.07821	1.02105	0.978749	1.05861	1.01771	1.00657	1.03277	1.01079	1.04377	0.00752249				18.9741	1.04519	1.12184	1.0542	0.969897	1.06091	1.1517	1.06282	1.11076	1.06274	1.07905	1.0193	0.979506	1.00634	1.01255	1.05063	0.997889	0.945512	0.997405	1.01941	1.063	0.986729
	19.4955	1.06014	1.02596	1.01082	1.02679	1.02387	1.06284	1.12554	1.05635	1.05953	1.06881	1.03583	1.10359	1.05416	1.07906	1.01827	0.977543	1.06356	1.0214	1.00697	1.0324	1.01046	1.04399	0.00755214				19.4741	1.04289	1.12955	1.04956	0.966757	1.06109	1.14562	1.06076	1.11221	1.08767	1.1157	1.05754	1.00956	1.04357	1.05833	1.09386	1.03412	0.976614	1.03173	1.052	1.10081	1.01966
	19.9955	1.05835	1.02666	1.01153	1.02295	1.01568	1.06573	1.12471	1.05921	1.06667	1.07186	1.03303	1.10644	1.05816	1.08235	1.02141	0.977178	1.06905	1.02219	1.00605	1.03517	1.01211	1.04507	0.00780615				19.9741	1.02704	1.11436	1.02739	0.944822	1.03729	1.13077	1.04103	1.09596	1.0822	1.09572	1.04614	1.00421	1.03389	1.05523	1.10665	1.04677	0.984163	1.03601	1.06379	1.11112	1.02599
	20.4955	1.06514	1.02682	1.0136	1.02581	1.02856	1.06524	1.12456	1.06486	1.06591	1.07569	1.0377	1.10731	1.05675	1.0832	1.02211	0.979697	1.06943	1.01913	1.00698	1.03117	1.01243	1.04677	0.00772947				20.4741	1.04439	1.1291	1.04697	0.967544	1.06802	1.14446	1.06053	1.12081	1.0721	1.08706	1.01912	0.983418	1.01289	1.02999	1.07387	1.01965	0.965599	1.00479	1.0357	1.08606	1.00144
	20.9955	1.06263	1.02803	1.01083	1.02623	1.02564	1.06345	1.1276	1.06011	1.07065	1.07553	1.03512	1.10878	1.05854	1.08022	1.02303	0.977811	1.07324	1.01965	1.00493	1.03342	1.01282	1.04658	0.00790179				20.9741	1.03001	1.12181	1.03782	0.948863	1.05645	1.13553	1.05583	1.11549	1.10031	1.11829	1.05575	1.01983	1.04689	1.07561	1.08218	1.02564	0.970799	1.00779	1.04172	1.09048	1.00528
	21.4955	1.06678	1.03102	1.01246	1.02842	1.03007	1.0704	1.12707	1.0582	1.06831	1.07631	1.03389	1.11047	1.05911	1.08321	1.02416	0.978878	1.07709	1.02197	1.00838	1.03427	1.01316	1.04827	0.00786589				21.4741	1.02462	1.11604	1.02371	0.947692	1.0451	1.12631	1.04193	1.10741	1.07534	1.10497	1.03323	0.995434	1.031	1.05495	1.07146	1.01429	0.964884	0.988545	1.03204	1.08687	0.997471
	21.9955	1.06995	1.03019	1.01143	1.02635	1.02644	1.06439	1.12327	1.06414	1.0695	1.07843	1.03864	1.10776	1.057	1.08249	1.01697	0.98289	1.0774	1.0256	1.00945	1.03531	1.01432	1.04819	0.00770443				21.9741	1.04808	1.13068	1.04277	0.954499	1.0581	1.15043	1.05808	1.12532	1.07346	1.09265	1.02572	0.991576	1.02253	1.04682	1.08196	1.02718	0.964992	1.00256	1.04068	1.10172	1.01454
	22.4955	1.07216	1.02843	1.01168	1.02648	1.02225	1.06465	1.11813	1.06128	1.06809	1.07787	1.04183	1.10906	1.05768	1.0812	1.02194	0.985609	1.0842	1.0226	1.01027	1.03619	1.01465	1.04839	0.00759733				22.4741	1.024	1.12109	1.03168	0.942468	1.05008	1.1296	1.04766	1.11733	1.07938	1.10885	1.0335	0.994507	1.0343	1.06146	1.0984	1.03747	0.978427	1.00565	1.05474	1.1091	1.0189
	22.9955	1.06752	1.03067	1.01166	1.02983	1.02938	1.07325	1.11708	1.06512	1.06751	1.07873	1.04241	1.10708	1.05619	1.08295	1.02605	0.985026	1.08632	1.02255	1.01257	1.03421	1.01385	1.04952	0.00750276				22.9741	1.03041	1.12876	1.04225	0.954514	1.05718	1.14181	1.0558	1.12557	1.07787	1.1078	1.03663	1.00431	1.03791	1.06232	1.0736	1.01787	0.961275	0.976608	1.03137	1.0939	0.996834
	23.4955	1.07107	1.03212	1.01041	1.03386	1.02803	1.06912	1.12478	1.06106	1.06711	1.08167	1.0399	1.11401	1.05853	1.08549	1.02959	0.981188	1.08771	1.02431	1.01583	1.0344	1.01714	1.05083	0.00782127				23.4741	1.04262	1.13786	1.04308	0.962568	1.06306	1.15077	1.06547	1.13855	1.07495	1.10253	1.02551	0.984269	1.03367	1.06017	1.07305	1.01402	0.969971	0.968572	1.03184	1.09459	0.991955
	23.9955	1.07405	1.0289	1.00928	1.03235	1.02919	1.06799	1.12069	1.05947	1.06431	1.07925	1.03892	1.10875	1.05541	1.08374	1.02589	0.981401	1.09287	1.02489	1.01129	1.03441	1.0162	1.04949	0.00775708				23.9741	1.0211	1.11949	1.0291	0.93482	1.04749	1.12505	1.04847	1.12094	1.08139	1.10988	1.03201	0.999481	1.04463	1.07331	1.08829	1.04197	0.984669	0.989427	1.05529	1.11982	1.01928
	24.4955	1.07286	1.03521	1.01406	1.03576	1.03028	1.07469	1.12561	1.06161	1.06926	1.08404	1.04221	1.10694	1.0575	1.08659	1.02527	0.982696	1.08869	1.0263	1.01248	1.0368	1.01702	1.05171	0.00773407				24.4741	1.02816	1.12617	1.03298	0.942116	1.05373	1.13527	1.05527	1.13083	1.0592	1.09658	1.00838	0.975416	1.02184	1.04448	1.10022	1.05648	0.998993	0.999875	1.06742	1.13896	1.03175
	24.9955	1.07351	1.03464	1.01311	1.03762	1.03575	1.06609	1.12019	1.05994	1.067	1.08209	1.04345	1.10723	1.06021	1.08721	1.0217	0.982778	1.09409	1.02846	1.01266	1.03767	1.01729	1.05156	0.00759219				24.9741	1.04638	1.14969	1.05214	0.954075	1.06701	1.14536	1.06876	1.14654	1.08354	1.1139	1.03123	0.996674	1.04196	1.07237	1.09367	1.04085	0.988839	0.981932	1.0534	1.12666	1.02099
	25.4955	1.07644	1.03278	1.01446	1.03545	1.02727	1.06242	1.12075	1.06573	1.06518	1.08943	1.04332	1.11163	1.05956	1.08706	1.0244	0.985383	1.09719	1.02871	1.01132	1.03414	1.01775	1.05192	0.00782355				25.4741	1.02914	1.12888	1.02496	0.937294	1.04869	1.12144	1.05497	1.13491	1.07024	1.1156	1.02748	0.996168	1.04483	1.07528	1.07348	1.03056	0.982227	0.970373	1.04101	1.1217	1.0147
	25.9955	1.07217	1.03682	1.01343	1.03741	1.03177	1.0627	1.12014	1.06493	1.07235	1.08699	1.04191	1.11221	1.06183	1.08628	1.01996	0.983005	1.10202	1.02712	1.01422	1.03557	1.01711	1.05238	0.00788742				25.9741	1.03635	1.14302	1.03661	0.941706	1.05961	1.12949	1.0662	1.14366	1.08326	1.11983	1.03171	1.00649	1.05163	1.07803	1.0922	1.05073	0.998351	0.979165	1.05882	1.13601	1.02453
	26.4955	1.07535	1.03689	1.01268	1.03606	1.03722	1.07006	1.11743	1.06299	1.07151	1.08716	1.03985	1.1123	1.05903	1.0834	1.01832	0.984603	1.10296	1.02652	1.01475	1.03817	1.0204	1.05274	0.00778351				26.4741	1.02967	1.14166	1.0404	0.939733	1.05209	1.12549	1.05841	1.14034	1.06948	1.11932	1.0142	0.997571	1.04084	1.07194	1.06963	1.02784	0.980145	0.949163	1.03529	1.11605	0.995406
	26.9955	1.07727	1.03762	1.01373	1.0399	1.03589	1.07268	1.12236	1.06431	1.0675	1.08987	1.04388	1.10998	1.06079	1.08576	1.01861	0.986475	1.10686	1.02977	1.01494	1.03588	1.02003	1.054	0.00787511				26.9741	1.06108	1.17406	1.06088	0.962012	1.07266	1.14902	1.08211	1.16412	1.07665	1.12048	1.02253	1.00207	1.04356	1.08512	1.066	1.0298	0.979364	0.943202	1.03551	1.11887	0.994951
	27.4955	1.07847	1.03863	1.01161	1.03671	1.03669	1.07461	1.11901	1.06935	1.07075	1.09089	1.03941	1.11325	1.06043	1.08548	1.01819	0.985757	1.11225	1.0313	1.01485	1.0393	1.02087	1.05466	0.00804736				27.4741	1.04516	1.15623	1.04696	0.963485	1.0648	1.14351	1.0776	1.15924	1.06522	1.11342	1.0111	0.989609	1.04232	1.07567	1.09284	1.05365	1.00428	0.97178	1.05818	1.14837	1.02639
	27.9955	1.07817	1.03994	1.01384	1.04217	1.03892	1.06459	1.11721	1.06442	1.07047	1.09294	1.04249	1.11221	1.05972	1.08522	1.02175	0.98557	1.10614	1.02935	1.0143	1.03764	1.01995	1.05414	0.00776841				27.9741	1.04693	1.17289	1.06035	0.968809	1.07784	1.14557	1.09037	1.16869	1.06825	1.10924	1.01841	0.997737	1.04953	1.07997	1.0529	1.03407	0.983669	0.944938	1.0382	1.12819	1.00008
	28.4955	1.07394	1.04057	1.01669	1.04652	1.04251	1.07498	1.11973	1.06364	1.07265	1.09262	1.04111	1.11608	1.06341	1.0863	1.01818	0.988048	1.1098	1.03173	1.01647	1.03727	1.02184	1.05591	0.00785134				28.4741	1.05605	1.17409	1.05443	0.967644	1.06795	1.15219	1.08327	1.1642	1.04534	1.09009	0.99282	0.971496	1.01747	1.05095	1.07681	1.05686	0.997532	0.955148	1.05256	1.15054	1.0175
	28.9955	1.07492	1.04007	1.01394	1.04347	1.04012	1.07081	1.11827	1.06657	1.06794	1.09479	1.04328	1.1151	1.06246	1.08282	1.01769	0.986315	1.1147	1.03236	1.01639	1.03924	1.0222	1.0554	0.00792451				28.9741	1.04961	1.17718	1.06465	0.968981	1.07412	1.14196	1.08473	1.16586	1.04388	1.08478	0.980214	0.967513	1.01596	1.04042	1.05942	1.04301	0.992535	0.941862	1.04505	1.14473	1.00993
	29.4955	1.07559	1.04506	1.01579	1.04562	1.04351	1.05445	1.11458	1.06618	1.06581	1.09578	1.04348	1.11672	1.0622	1.087	1.02168	0.985975	1.11293	1.03324	1.01806	1.04073	1.02306	1.05559	0.00772102				29.4741	1.0324	1.14257	1.03572	0.945344	1.04588	1.11744	1.05998	1.14513	1.04769	1.09333	0.990294	0.97737	1.023	1.06326	1.06647	1.05177	0.99073	0.940066	1.0399	1.15021	1.01318
	29.9955	1.07793	1.04329	1.01424	1.0476	1.05051	1.06763	1.11096	1.06615	1.06943	1.09852	1.04342	1.11848	1.05998	1.08948	1.01482	0.983569	1.12089	1.03375	1.01555	1.03972	1.0232	1.05662	0.00809924				29.9741	1.04466	1.15847	1.04375	0.955706	1.06168	1.13285	1.07208	1.16117	1.07022	1.11802	1.01013	1.00444	1.0498	1.09309	1.05677	1.03905	0.984725	0.923858	1.02999	1.14074	0.996323
	30.4955	1.08092	1.04628	1.01618	1.04833	1.05371	1.06395	1.11001	1.06496	1.06493	1.10069	1.03744	1.11748	1.05946	1.08976	1.01956	0.984634	1.12066	1.03552	1.01518	1.04002	1.02376	1.05683	0.00798017				30.4741	1.04232	1.14639	1.03573	0.946791	1.05257	1.12354	1.06681	1.15368	1.03956	1.10115	0.987607	0.979154	1.02263	1.05455	1.07268	1.06417	1.00186	0.943219	1.04961	1.17015	1.02214
	30.9955	1.07819	1.04497	1.01852	1.04804	1.04554	1.06414	1.11043	1.06326	1.06832	1.10029	1.04187	1.11786	1.05995	1.08907	1.02306	0.9837	1.1269	1.03642	1.01605	1.03991	1.0242	1.05718	0.00802983				30.9741	1.0549	1.18205	1.05524	0.971335	1.07478	1.1418	1.08322	1.17447	1.06587	1.12155	1.00209	1.00155	1.05314	1.09767	1.08514	1.07067	1.00554	0.945893	1.05363	1.17609	1.02342
	31.4955	1.07965	1.04247	1.017	1.04947	1.04757	1.06565	1.1112	1.06653	1.07388	1.10023	1.03849	1.11491	1.05994	1.08713	1.01501	0.984828	1.12918	1.0358	1.01979	1.04201	1.02507	1.05742	0.00810569				31.4741	1.0548	1.17666	1.05673	0.965631	1.08015	1.13739	1.09013	1.17642	1.04473	1.09503	0.988411	0.978049	1.02605	1.07042	1.04719	1.04452	0.986885	0.917229	1.03075	1.15264	1.00071
	31.9955	1.08161	1.04649	1.0189	1.05084	1.0513	1.06815	1.1074	1.06724	1.06819	1.10827	1.04431	1.11794	1.06439	1.0922	1.02079	0.986296	1.13269	1.03816	1.01784	1.04088	1.0248	1.05946	0.00816864				31.9741	1.03656	1.15394	1.03072	0.950934	1.04863	1.11694	1.06482	1.15592	1.05023	1.09832	0.983852	0.979532	1.02746	1.07056	1.04588	1.04747	0.987961	0.912832	1.0263	1.15386	0.9968
	32.4955	1.08368	1.04643	1.01776	1.04941	1.03972	1.0774	1.10786	1.0697	1.0698	1.10708	1.04282	1.11287	1.06085	1.08978	1.01805	0.986856	1.13432	1.03747	1.02146	1.04076	1.02577	1.05904	0.00819083				32.4741	1.05308	1.18658	1.05447	0.979595	1.08326	1.14352	1.09084	1.18294	1.0407	1.09867	0.979321	0.977455	1.02589	1.07428	1.08753	1.08615	1.01621	0.945797	1.05867	1.19435	1.0321
	32.9955	1.08331	1.04709	1.02049	1.05121	1.04996	1.06911	1.10755	1.06911	1.07521	1.10873	1.04407	1.11731	1.06156	1.09306	1.0168	0.986456	1.13803	1.03756	1.02169	1.04075	1.02637	1.06026	0.00830253				32.9741	1.0195	1.14678	1.02733	0.942054	1.03807	1.10629	1.05533	1.14918	1.07241	1.12953	1.00956	1.00889	1.06225	1.11097	1.03968	1.03868	0.982024	0.902011	1.02065	1.15354	0.992637
	33.4955	1.07914	1.0507	1.02056	1.05629	1.05201	1.07488	1.10377	1.07188	1.07328	1.10751	1.03887	1.11711	1.05801	1.08856	1.01656	0.987544	1.13714	1.03875	1.02381	1.0408	1.02649	1.06018	0.00811611				33.4741	1.03043	1.15273	1.02507	0.948076	1.04114	1.10642	1.05497	1.1499	1.06724	1.12504	0.997937	1.00586	1.05071	1.09716	1.05949	1.05654	0.985602	0.910817	1.02697	1.16442	1.00545
	33.9955	1.07696	1.04843	1.02033	1.05547	1.04496	1.06337	1.10114	1.06521	1.07127	1.10928	1.03871	1.11994	1.05852	1.08977	1.01589	0.989699	1.14057	1.03657	1.02412	1.04391	1.02797	1.05915	0.00815737				33.9741	1.03083	1.15906	1.02842	0.962786	1.04947	1.11025	1.06462	1.15814	1.04632	1.10256	0.979168	0.984922	1.02808	1.08061	1.06134	1.0669	1.00233	0.923422	1.03896	1.1789	1.02023
	34.4955	1.07854	1.05122	1.01979	1.05482	1.04528	1.07666	1.10535	1.07697	1.07219	1.11179	1.04246	1.11692	1.05845	1.08905	1.01917	0.987711	1.14333	1.03994	1.02462	1.04324	1.02776	1.0612	0.00829655				34.4741	1.04391	1.17433	1.04701	0.972713	1.06373	1.11848	1.07353	1.1723	1.0721	1.12882	1.0001	1.01016	1.05269	1.10462	1.08468	1.09077	1.01573	0.940622	1.05844	1.20481	1.0397
	34.9955	1.08055	1.05089	1.02047	1.05906	1.04111	1.0736	1.09672	1.07223	1.07012	1.11211	1.04273	1.11897	1.06114	1.09282	1.01864	0.98499	1.15061	1.04258	1.02729	1.04751	1.02825	1.06154	0.00842552				34.9741	1.05661	1.18521	1.05991	0.990053	1.08246	1.14072	1.09306	1.18876	1.0572	1.11753	0.988082	1.00057	1.04719	1.10284	1.04278	1.04667	0.984664	0.898305	1.02324	1.16266	1.00133
	35.4955	1.08053	1.05226	1.02058	1.05799	1.03884	1.07907	1.10314	1.07185	1.0754	1.11387	1.04406	1.12077	1.0594	1.09006	1.01337	0.986162	1.15226	1.04178	1.02683	1.04546	1.02995	1.06208	0.00865141				35.4741	1.05557	1.17802	1.04837	0.987215	1.07644	1.12972	1.08591	1.18278	1.03373	1.09335	0.963245	0.973835	1.02428	1.07708	1.06502	1.07259	1.00105	0.916984	1.04065	1.18464	1.02148
	35.9955	1.08065	1.04446	1.01547	1.05067	1.04188	1.06474	1.09869	1.07011	1.07538	1.1174	1.04756	1.12038	1.06067	1.09076	1.01479	0.985827	1.15487	1.0437	1.02692	1.04489	1.02979	1.06093	0.00872801				35.9741	1.03395	1.16619	1.03589	0.968825	1.04899	1.1138	1.06437	1.16147	1.06228	1.11377	0.980368	1.0021	1.04182	1.09648	1.07792	1.08125	1.00719	0.929845	1.04673	1.19948	1.03899
	36.4955	1.077	1.0519	1.02443	1.06265	1.03947	1.05922	1.0975	1.0676	1.06638	1.11641	1.04533	1.11639	1.0592	1.08615	1.01756	0.985458	1.15677	1.04262	1.0273	1.04301	1.03053	1.06061	0.00845979				36.4741	1.02659	1.1592	1.03217	0.974599	1.05395	1.10473	1.07107	1.16503	1.05925	1.13122	0.989937	1.01189	1.04996	1.11113	1.05596	1.06805	0.991929	0.916075	1.03417	1.19062	1.02917
	36.9955	1.07647	1.05558	1.02837	1.06435	1.04275	1.07343	1.09393	1.0728	1.07106	1.12057	1.04612	1.1198	1.05718	1.08871	1.01801	0.988103	1.15637	1.04316	1.02655	1.04405	1.03018	1.06274	0.00846583				36.9741	1.03489	1.16731	1.03496	0.977453	1.05382	1.1122	1.07398	1.16856	1.05897	1.12017	0.991128	1.00286	1.05061	1.10866	1.0614	1.07958	0.992383	0.918797	1.03945	1.19422	1.0315
	37.4955	1.07665	1.05495	1.02712	1.0613	1.05008	1.06593	1.09429	1.07515	1.07302	1.11757	1.04216	1.11737	1.05263	1.08923	1.00962	0.98698	1.15919	1.0457	1.03035	1.04391	1.03058	1.06209	0.00855662				37.4741	1.04234	1.17199	1.04443	0.988985	1.05838	1.11996	1.07759	1.17476	1.02301	1.07833	0.952937	0.958713	1.00333	1.05528	1.04233	1.0584	0.985568	0.905091	1.02355	1.17621	1.01917
	37.9955	1.07873	1.05733	1.02771	1.06422	1.04294	1.0706	1.09119	1.07433	1.07354	1.12059	1.04166	1.11689	1.05758	1.0869	1.01729	0.987561	1.16086	1.04841	1.03239	1.0455	1.03064	1.06318	0.00847371				37.9741	1.0403	1.1663	1.03569	0.987764	1.06292	1.11493	1.0779	1.17647	1.04215	1.10281	0.974781	0.988625	1.0309	1.08541	1.06978	1.07039	0.982043	0.90899	1.0329	1.18724	1.02067
	38.4955	1.07816	1.05638	1.02756	1.06713	1.04121	1.06833	1.09043	1.07128	1.06896	1.12092	1.0455	1.11705	1.05584	1.08541	1.02196	0.98655	1.16143	1.04509	1.03193	1.04517	1.03079	1.06272	0.00843736				38.4741	1.03544	1.163	1.03663	0.986018	1.05255	1.11134	1.07248	1.16752	1.04181	1.10271	0.9727	0.986908	1.0284	1.08075	1.04808	1.07374	0.985614	0.916748	1.03564	1.19632	1.03637
	38.9955	1.07859	1.05705	1.02777	1.06526	1.0483	1.07474	1.08884	1.07068	1.06802	1.12227	1.04821	1.12033	1.05961	1.08678	1.01861	0.987849	1.15738	1.04671	1.03324	1.04401	1.03201	1.06363	0.00834029				38.9741	1.06368	1.18088	1.0635	1.01283	1.07901	1.13171	1.09377	1.19134	1.05277	1.10971	0.979156	1.00748	1.04331	1.10358	1.07393	1.10449	1.01558	0.934608	1.06138	1.22264	1.05314
	39.4955	1.07524	1.06183	1.02869	1.06775	1.05558	1.06496	1.08876	1.07438	1.07616	1.12782	1.05011	1.11764	1.05881	1.08766	1.01988	0.990568	1.15603	1.04442	1.03047	1.04295	1.03295	1.06441	0.00827829				39.4741	1.05376	1.18593	1.06019	1.01637	1.08711	1.12974	1.10332	1.19819	1.02499	1.08283	0.963037	0.976959	1.01374	1.06003	1.05176	1.07593	0.986085	0.914499	1.03481	1.19439	1.03565
	39.9955	1.07543	1.06209	1.02896	1.06919	1.05142	1.07209	1.08389	1.07076	1.06791	1.12187	1.0483	1.11567	1.05558	1.09025	1.02135	0.993098	1.16163	1.04463	1.03523	1.04486	1.0327	1.06414	0.00816806				39.9741	1.03535	1.15664	1.03344	1.00085	1.05109	1.10945	1.06984	1.16679	1.04603	1.11488	0.984098	0.997236	1.04361	1.09655	1.05829	1.08336	0.986024	0.915892	1.03347	1.19709	1.03503
	40.4955	1.07757	1.06373	1.03069	1.07102	1.05534	1.07376	1.08804	1.0755	1.07405	1.12724	1.05077	1.1204	1.06265	1.08764	1.0245	0.991586	1.16144	1.04707	1.03521	1.0453	1.03443	1.06657	0.00827219				40.4741	1.0457	1.17582	1.04679	1.01157	1.06649	1.12082	1.08695	1.17905	1.05238	1.10789	0.989233	1.00235	1.049	1.10508	1.06143	1.07881	0.989122	0.908064	1.03311	1.1974	1.02959
	40.9955	1.07715	1.06399	1.03287	1.07141	1.05028	1.0759	1.08737	1.07597	1.07209	1.12413	1.05185	1.11875	1.05781	1.08715	1.01444	0.992707	1.16552	1.04554	1.03465	1.04662	1.03383	1.06572	0.00842532				40.9741	1.0394	1.15501	1.03776	1.00177	1.05172	1.1101	1.07473	1.16765	1.03499	1.10835	0.984011	0.992804	1.03358	1.08557	1.04584	1.08409	0.989335	0.915535	1.03994	1.2035	1.0394
	41.4955	1.07612	1.07168	1.03409	1.07459	1.05481	1.07413	1.08385	1.07415	1.07664	1.12368	1.05364	1.11487	1.06039	1.08643	1.02045	0.995163	1.16484	1.04659	1.03545	1.04608	1.03335	1.06671	0.00814407				41.4741	1.05453	1.1825	1.05699	1.01931	1.06903	1.12092	1.09077	1.18378	1.02348	1.09301	0.965292	0.975512	1.02296	1.07189	1.08445	1.10004	1.00736	0.927509	1.05017	1.21926	1.05261
																												41.9741	1.05551	1.17346	1.04998	1.01333	1.06462	1.11789	1.09123	1.18348	1.0457	1.10823	0.996595	1.00019	1.05165	1.09956	1.06191	1.09624	0.996598	0.924764	1.04431	1.21793	1.04927
																												42.4741	1.03705	1.16914	1.04505	1.00695	1.05216	1.10029	1.07963	1.16769	1.02174	1.08892	0.965697	0.968448	1.01727	1.06201	1.0658	1.09374	0.993679	0.917982	1.03915	1.20943	1.04382
	MAX	1.08092	1.04628	1.01669	1.04833	1.05371	1.07498	1.1276	1.06935	1.07265	1.10827	1.04431	1.11848	1.06439	1.0922	1.02959	1	1.12089	1.03552	1.01806	1.04073	1.02376	1.061	0.00802				42.9741	1.05187	1.17659	1.04684	1.01944	1.06157	1.11496	1.0844	1.17849	1.02589	1.08976	0.979078	0.97454	1.0259	1.07104	1.05442	1.08361	0.986551	0.906851	1.03238	1.20105	1.03134
																							1.144	0.01581	pmEKAR only control
																									Unpaired t test with Welch's correction
																									P value	<0.0001
																									P value summary	****
																									Significantly different (P < 0.05)?	Yes
																									One- or two-tailed P value?	Two-tailed
																									Welch-corrected t, df	t=4.683 df=28.26
																									How big is the difference?
																									Mean ± SEM of column A	1.144 ± 0.01581, n=20
																									Mean ± SEM of column B	1.061 ± 0.00802, n=21
																									Difference between means	-0.08301 ± 0.01773
																									95% confidence interval	-0.1193 to -0.04672
																									R squared (eta squared)	0.437
																									F test to compare variances
																									F, DFn, Dfd	3.701, 19, 20
																									P value	0.0055
																									P value summary	**
																									Significantly different (P < 0.05)?	Yes
[truncated: 2 more columns]
