# Supplementary material for: Signaling diversity enabled by Rap1-regulated plasma membrane ERK with distinct temporal dynamics
Source: eLife. 2020 May 26;9:e57410. doi: 10.7554/eLife.57410 (PMC7289600; doi:10.7554/eLife.57410)
Supplement: Figure 4—source data 1. [file elife-57410-fig4-data1.xlsx]

## Sheet: Figure 4A-B, F4 - Supplement 1
		pmEKAR4 + pmEMBer																																								cytoEKAR4 + pmEMBer
	Time (Min)	Cell 1	Cell 2	Cell 3	Cell 4	Cell 5	Cell 6	Cell 7	Cell 8	Cell 9	Cell 10	Cell 11	Cell 12	Cell 13	Cell 14	Cell 15	Cell 16	Cell 17	Cell 18	Cell 19	Cell 20	Cell 21	Cell 22	Cell 23	Cell 24	Cell 25	Cell 26	Cell 27	Cell 28	Cell 29	Cell 30	Cell 31	Cell 32	Cell 33	Cell 34	Cell 35	Cell 36	AVERAGE	SEM		Time (min)	Cell 1	Cell 2	Cell 3	Cell 4	Cell 5	Cell 6	Cell 7	Cell 8
	-5.70889	0.974454	0.970257	0.998636	1.00367	1.00744	1.00407	1.01058	1.00504	0.996899	1.01049	0.972401	0.995894	0.999871	0.999352	1.00262	1.003	1.00648	1.00601	1.00086	1.02566	1.00957	1.0119	1.00022	1.01593	1.00031	0.994881	1.01153	1.0174	0.997582	1.00396	0.993912	0.999072	1.0054	1.01225	0.980896	0.977715	1.00073	0.00207854		-5.8185	0.932971	0.968859	0.984505	0.982867	1.02119	0.941043	0.977961	1.0163
	-5.20889	0.987549	0.966764	0.996729	1.00286	1.0091	1.00368	1.00675	1.0017	0.99047	1.00629	0.973299	0.991255	0.997766	0.995853	1.00053	1.01933	1.00426	1.02832	0.998959	1.02336	1.0067	1.00634	1.00463	1.00433	1.00582	0.994832	1.00538	1.00907	0.99175	1.00232	0.995809	0.995947	1.00701	1.01214	0.990024	0.97963	1.00046	0.00203434		-5.53683	0.936142	0.959666	0.962882	0.9836	1.0175	0.955964	0.984532	0.989967
	-4.70889	0.996988	0.987421	1.00069	1.0036	1.00506	1.00436	1.00148	1.00569	0.993364	1.00597	0.978186	0.994166	1.00059	0.997986	1.00236	1.02153	1.01854	1.02578	1.00251	1.02202	1.00979	1.00607	1.00226	1.00707	1.00696	0.991033	1.00909	1.00897	0.993785	1.00138	0.993949	1.00031	1.00243	1.00934	0.978811	0.979241	1.00191	0.0018304		-5.03683	0.932301	0.944555	0.960632	0.981579	1.01424	0.957056	0.985892	0.981656
	-4.20889	0.983845	0.984956	0.999348	1.0046	1.00716	1.004	0.999749	1.00046	0.997663	1.00321	0.976318	0.991045	0.998839	0.997308	1.0003	1.01971	1.01587	1.02226	0.999851	1.01941	1.00837	1.00412	1.00139	1.01129	1.00802	0.99587	1.00879	1.00942	0.99743	1.00185	0.996627	0.995241	1.00273	1.00773	0.989662	0.985955	1.0014	0.00168155		-4.53683	0.942719	0.950277	0.958998	0.983623	1.00934	0.961199	0.984516	0.986577
	-3.70889	1.00093	0.990846	0.998559	1.00276	1.00409	1.00253	1.0005	1.00392	0.99497	1.00347	0.980164	0.998923	0.999366	0.999941	1.0014	1.01668	1.0079	1.01585	0.999064	1.01486	1.00909	1.00604	1.00199	1.01371	1.00474	0.999457	1.00513	1.00891	0.992285	1.00311	0.998969	0.998618	1.00214	1.0053	0.988196	0.990388	1.0018	0.00127249		-4.03683	0.950635	0.959057	0.9662	0.986085	1.01017	0.966896	0.990197	0.9912
	-3.20889	1.00195	0.992336	1.00043	1.00096	1.00374	1.00401	1.01019	1.00129	0.994987	1.00106	0.976755	0.992083	0.997505	0.998098	0.999926	1.01838	1.00889	1.01382	0.997604	1.01238	1.00866	1.0042	0.999501	1.01374	1.00526	0.9958	1.00747	1.00552	0.99398	0.999234	1.00455	0.998713	1.00537	1.00296	0.990987	0.986498	1.00136	0.00135467		-3.53683	0.954752	0.9655	0.96908	0.986616	1.00645	0.971219	0.985937	0.983099
	-2.70889	1.00794	0.993513	0.998888	1.00483	1.00432	1.0024	1.00686	0.999358	0.996753	1.00573	0.98852	0.997473	0.999689	0.998314	1.0015	1.01455	1.018	1.01767	0.998691	1.01079	1.00676	1.00358	0.998994	1.01101	1.00236	0.995753	1.00482	1.00514	0.997312	1.00043	0.993915	0.998996	0.998919	1.00378	1.01518	0.993484	1.00267	0.00115635		-3.03683	0.960661	0.975031	0.963899	0.98821	1.00417	0.972947	0.989054	0.997001
	-2.20889	0.998356	0.992656	0.999977	1.00355	0.99932	1.00232	1.00936	0.997377	0.998069	1.00236	0.986685	0.991466	0.997782	0.99894	0.999998	1.01064	1.00679	1.01852	0.996975	1.00778	1.0058	1.00377	0.999748	1.01111	0.997091	1.00111	1.00409	1.00603	0.996386	1.00275	0.991548	0.998288	1.00075	1.00384	1.00169	0.993089	1.001	0.00104121		-2.53683	0.964093	0.983676	0.984997	0.991862	1.00335	0.978335	0.990613	1.00824
	-1.70889	1.0103	0.997799	0.999427	0.999518	0.996555	1.00192	1.00504	0.998297	0.996148	1.00154	0.985242	0.997257	0.999889	1.0003	1.00335	1.00905	1.01215	1.0124	0.994562	1.00752	1.00378	1.00334	1.0004	1.01081	1.00015	1.00402	1.00771	1.00507	1.00007	1.00301	0.999597	1.00673	0.999714	1.00143	1.00928	0.995464	1.00219	0.000939901		-2.03683	0.976491	0.984469	0.984699	0.990437	1.00169	0.981682	0.991593	1.00232
	-1.35833							1.00024	1.00048	0.999358	1.00402	0.991429	0.997378	0.998423	1.00001	1.00192									1.00954	1.00767	1.00782	1.00867	1.00508	0.997553	1.00091	0.992491	0.997842	0.997736	0.998299			1.00084	0.00112042		-1.53683	0.974175	0.97958	0.979909	0.992594	0.999298	0.986702	0.992353	0.995471
EGF addition	0	1	1	1	1	1	1	1	1	1	1	1	1	1	1	1	1	1	1	1	1	1	1	1	1	1	1	1	1	1	1	1	1	1	1	1	1	1	0		0	1	1	1	1	1	1	1	1
	0.478028	1.02204	0.994452	0.995019	0.999533	0.993629	0.997042	0.991506	0.990844	0.990671	0.993958	0.995752	0.99007	0.995041	0.994611	0.994563	1.01138	1.0038	0.994293	0.992697	0.999564	1.00002	1.00157	1.00065	0.999869	0.997789	0.994597	0.999016	0.999385	0.997021	0.997698	0.993636	0.996304	0.991241	0.993833	1.01596	1.00312	0.997838	0.00113324		0.478	1.00946	1.02669	1.00925	1.01302	1.00615	1.01046	1.01049	1.01021
	0.978028	1.01292	1.00612	0.997903	0.995853	0.992206	0.998274	1.01106	0.990776	0.992866	0.9939	0.9996	0.992045	0.99646	0.99197	0.995433	1.02788	0.998679	0.989526	0.990327	0.996235	0.998609	0.994713	1.00105	1.00294	0.994677	1.00268	0.993979	0.996005	0.997674	0.998088	0.99886	0.996098	0.991834	0.990477	1.02773	1.00547	0.998915	0.00149347		0.978	1.01698	1.03367	1.01485	1.01017	1.00493	1.0161	1.01167	1.01667
	1.47803	1.01221	1.00219	0.996898	0.996177	0.989948	0.994146	1.00723	0.99036	0.991919	0.993594	0.998724	0.984554	0.994064	0.992957	0.993946	1.03353	1.00612	0.991589	0.98678	0.992866	0.999863	0.991767	0.996497	0.994171	0.983253	0.99407	0.992992	0.985588	0.997527	0.998411	0.995004	0.99847	0.992406	0.991031	1.02345	1.00091	0.996811	0.0016499		1.478	1.02212	1.0627	1.0273	1.0223	0.999633	1.01923	1.01638	1.01415
	1.97803	1.02749	1.00342	0.99737	0.994517	0.988692	0.996185	0.994287	0.980976	0.989703	0.989408	0.995718	0.985605	0.991096	0.992127	0.993188	1.03124	1.00407	0.992643	0.989389	0.99757	1.00073	0.9943	0.998022	1.00004	0.992753	1.00068	0.994398	0.993478	0.997356	0.999326	1.00039	0.999021	0.988237	0.986735	1.02497	1.0033	0.997457	0.00178752		1.978	1.0198	1.12617	1.04935	1.03862	0.997766	1.02131	1.02907	1.01678
	2.47803	1.02763	1.01267	0.997595	0.992058	0.98588	0.992221	1.00102	0.983863	0.995437	0.98378	0.998876	0.984238	0.989912	0.991447	0.991867	1.0267	1.00611	0.996071	0.989292	0.994733	0.998457	0.989076	0.99443	0.998342	1.00213	1.00139	1.00277	1.01881	1.00451	0.995549	0.990689	0.998914	0.988364	0.985839	1.02699	1.00528	0.998415	0.00196203		2.478	1.04364	1.35522	1.14092	1.11658	1.00722	1.02616	1.08919	1.06052
	2.97803	1.02336	1.00074	0.993569	0.987689	0.987038	0.987129	1.0146	0.984256	1.00685	0.976963	0.999929	0.989696	0.990081	0.988248	0.987551	1.02977	1.00371	0.995687	0.984036	0.996869	0.999484	0.986137	0.993271	1.00915	1.02425	1.00722	1.01037	1.05923	1.01769	0.995438	0.994708	0.998957	0.987939	0.983596	1.00313	1.0172	1.00043	0.00273794		2.978	1.04602	1.55934	1.27325	1.30985	1.0189	1.02934	1.27619	1.11896
	3.47803	1.04229	1.01788	0.993506	0.988112	0.985996	0.985655	1.04972	0.984874	1.0339	0.977387	1.00247	1.00402	0.988117	0.986586	0.986455	1.02581	1.00256	0.987454	0.987175	0.993442	0.994353	0.988932	0.99112	1.02019	1.04438	1.02142	1.03754	1.12424	1.04106	0.99504	0.991923	0.998837	0.980813	0.980307	1.01864	1.04324	1.00821	0.00494894		3.478	1.08069	1.68209	1.44454	1.60556	1.05184	1.04287	1.61081	1.2113
	3.97803	1.04272	1.02841	1.00528	0.9856	0.981583	0.979973	1.07769	0.995228	1.08492	0.982905	1.01853	1.02775	0.988973	0.986936	0.987903	1.03547	0.997673	0.994908	0.985144	0.991528	0.99118	0.985368	0.990781	1.02634	1.0529	1.02038	1.06567	1.19057	1.06944	0.999372	0.99514	0.99902	0.991475	0.977966	1.0299	1.08412	1.01802	0.00728683		3.978	1.15628	1.69251	1.54839	1.88532	1.11399	1.05988	1.8834	1.27688
	4.47803	1.04494	0.990513	1.01025	0.990465	0.985616	0.982275	1.11268	1.01196	1.14506	0.979962	1.02691	1.06303	0.988182	0.984417	0.988503	1.04562	1.00069	0.99295	0.988285	0.989526	0.992886	0.985041	0.989239	1.04329	1.06597	1.02878	1.10263	1.23232	1.09335	1.00102	0.995345	0.994512	0.988392	0.973361	1.04017	1.11224	1.02668	0.00954751		4.478	1.25185	1.69165	1.59993	2.03945	1.20284	1.08584	1.99124	1.29557
	4.97803	1.04306	1.02566	1.04609	1.01614	0.996089	0.983988	1.12372	1.04758	1.20397	0.98096	1.04974	1.11142	0.991524	0.982753	0.988103	1.05526	1.00353	0.994518	0.989438	0.991452	0.991373	0.986735	0.98909	1.05905	1.05931	1.02954	1.12561	1.25936	1.10475	1.00322	0.990035	0.991706	0.990383	0.971789	1.03199	1.11703	1.03683	0.0110049		4.978	1.38777	1.69229	1.58074	2.08288	1.31473	1.12713	2.01695	1.29649
	5.47803	1.073	1.02784	1.08802	1.06199	1.00833	1.00471	1.12892	1.09303	1.23731	0.988774	1.08028	1.16023	0.993699	0.983488	0.990247	1.04864	0.993396	0.991306	0.992908	0.987586	0.991858	0.986018	0.989462	1.06857	1.05718	1.03615	1.13682	1.2787	1.12262	1.01154	0.991826	0.98928	0.990867	0.97035	1.03869	1.12571	1.04776	0.0123527		5.478	1.51036	1.69005	1.60609	2.09213	1.44566	1.18139	2.01496	1.31594
	5.97803	1.08306	1.03206	1.14823	1.09599	1.02647	1.03913	1.13435	1.14058	1.25098	0.995548	1.10628	1.20039	0.998402	0.983989	0.991801	1.05501	1.00078	0.991939	0.998826	0.9876	0.99199	0.990557	0.99052	1.07658	1.04818	1.03354	1.14351	1.2802	1.12291	1.01764	0.994446	0.990122	1.00905	0.971875	1.03022	1.12058	1.05759	0.0131631		5.978	1.58299	1.66979	1.60023	2.08295	1.56484	1.24987	2.01532	1.32143
	6.47803	1.07925	1.02103	1.21245	1.1077	1.04119	1.07367	1.13488	1.17808	1.25331	0.99469	1.12749	1.22049	1.00347	0.981818	0.991069	1.05286	0.992472	0.991428	0.999888	0.987271	0.988867	0.990833	0.989112	1.08265	1.04339	1.04352	1.14601	1.28532	1.13117	1.0258	0.995774	0.990976	1.04101	0.972765	1.044	1.12312	1.06497	0.0141495		6.478	1.65093	1.69658	1.61333	2.09883	1.65879	1.33327	2.01554	1.33886
	6.97803	1.10046	1.03312	1.25323	1.11235	1.05557	1.09805	1.14675	1.21227	1.25261	1.00252	1.15015	1.23479	1.01404	0.983294	0.99147	1.05363	1.00313	1.00147	1.00281	0.985172	0.987337	0.998667	0.988496	1.09015	1.05717	1.03957	1.1498	1.28685	1.13225	1.03175	0.994148	0.992118	1.09304	0.979922	1.03615	1.12048	1.07402	0.0148162		6.978	1.6863	1.69377	1.60361	2.0814	1.72643	1.41596	2.01297	1.35307
	7.47803	1.10677	1.02347	1.28711	1.11428	1.06717	1.10698	1.14771	1.23242	1.25477	1.008	1.16153	1.24319	1.02323	0.983676	0.992067	1.05271	0.992934	0.997572	1.00017	0.984724	0.990524	0.999232	0.993296	1.09893	1.06326	1.04799	1.14588	1.27805	1.13109	1.04123	0.996865	0.995675	1.15425	0.987414	1.03959	1.11905	1.07952	0.0154083		7.478	1.68947	1.66321	1.59263	2.0836	1.76458	1.49371	2.01038	1.36199
	7.97803	1.11966	1.03256	1.30708	1.11693	1.07487	1.10628	1.14415	1.25471	1.26064	1.02306	1.17125	1.24686	1.03555	0.983959	0.992947	1.05814	0.993655	1.00073	1.00213	0.987126	0.988549	1.0025	0.994694	1.09874	1.06026	1.04745	1.14732	1.28263	1.13175	1.04636	0.994508	1.00591	1.19851	0.994567	1.04352	1.11884	1.08523	0.0159532		7.978	1.69322	1.67579	1.58836	2.07494	1.78974	1.57126	2.00887	1.37838
	8.47803	1.12278	1.04415	1.31267	1.11569	1.07615	1.10626	1.15102	1.24996	1.2587	1.0158	1.16626	1.24546	1.04313	0.982549	0.994823	1.05776	0.99392	1.0028	0.999686	0.986623	0.985388	1.0087	0.994901	1.10076	1.05396	1.04682	1.14811	1.28274	1.13623	1.05264	0.997548	1.017	1.22057	1.00208	0.995404	1.10988	1.08553	0.0161311		8.478	1.70221	1.66905	1.5872	2.09006	1.80588	1.63416	2.00402	1.37334
	8.97803	1.12827	1.03032	1.3162	1.11448	1.08167	1.1055	1.14899	1.25771	1.26017	1.02407	1.17243	1.24568	1.05255	0.98632	0.999381	1.05774	0.99085	1.00278	1.00309	0.984363	0.983262	1.01416	0.997752	1.10636	1.05564	1.04566	1.14324	1.28883	1.13424	1.05536	1.00314	1.02815	1.22129	1.00479	1.04441	1.12019	1.08914	0.0160363		8.978	1.691	1.64813	1.58058	2.07795	1.81605	1.68902	2.001	1.37238
	9.47803	1.12701	1.04297	1.31649	1.11511	1.08529	1.10408	1.13368	1.25256	1.25349	1.02482	1.17531	1.24298	1.05972	0.98599	1.00209	1.0724	0.992636	1.00471	0.999285	0.981755	0.986762	1.02017	1.00163	1.09972	1.05689	1.05299	1.14741	1.28566	1.13185	1.05628	1.01973	1.04381	1.22388	1.00947	1.06598	1.12326	1.09161	0.0155745		9.478	1.69872	1.67016	1.58872	2.07936	1.81585	1.73784	1.9955	1.4101
	9.97803	1.13841	1.04463	1.31849	1.11569	1.0879	1.1077	1.15444	1.26273	1.26099	1.03302	1.1778	1.24598	1.06786	0.987767	1.00411	1.06126	0.989321	1.00454	1.00065	0.983215	0.98485	1.03001	1.00435	1.10491	1.04848	1.0458	1.14109	1.27974	1.13589	1.05836	1.03994	1.0713	1.23032	1.00978	1.05601	1.11898	1.09462	0.0156825		9.978	1.70057	1.7017	1.63097	2.08753	1.81701	1.77101	1.99422	1.41084
	10.478	1.132	1.04728	1.32083	1.11153	1.08924	1.10383	1.15869	1.26165	1.25346	1.03186	1.17851	1.2479	1.07207	0.989872	1.00639	1.0647	0.994762	1.01303	1.00245	0.98115	0.9885	1.03451	1.00995	1.10172	1.05904	1.04178	1.14143	1.28287	1.13414	1.0596	1.06532	1.08994	1.22624	1.00721	1.06909	1.1281	1.09724	0.015405		10.478	1.69423	1.67158	1.61745	2.08818	1.80659	1.79407	1.98948	1.42219
	10.978	1.16881	1.06309	1.32465	1.11831	1.09392	1.10621	1.15315	1.26356	1.25913	1.03653	1.17794	1.24328	1.07617	0.989391	1.00839	1.04957	0.993337	1.00869	1.00726	0.984169	0.989586	1.03868	1.01143	1.10448	1.05408	1.04913	1.14408	1.28445	1.13394	1.06431	1.09303	1.10544	1.22643	1.00965	1.05832	1.11649	1.10025	0.015459		10.978	1.69115	1.67961	1.62183	2.07632	1.79894	1.81402	1.9835	1.42152
	11.478	1.13761	1.04519	1.3222	1.11385	1.09418	1.10165	1.16183	1.27036	1.26107	1.03719	1.18215	1.24386	1.07849	0.991567	1.01277	1.05758	0.999269	1.01554	1.00715	0.982059	0.990001	1.03482	1.01638	1.10407	1.06115	1.04545	1.146	1.28073	1.13319	1.06344	1.12771	1.1196	1.2234	1.00559	1.06155	1.12249	1.10142	0.0153763		11.478	1.68914	1.67284	1.63061	2.07924	1.78955	1.82678	1.97247	1.42929
	11.978	1.14629	1.05661	1.31927	1.11428	1.09188	1.10545	1.15446	1.25988	1.2553	1.03705	1.17824	1.2383	1.08016	0.993242	1.01416	1.06135	1.01166	1.01857	1.00839	0.979515	0.99041	1.03747	1.02015	1.10342	1.05906	1.04597	1.14156	1.28173	1.13533	1.06446	1.15834	1.12376	1.22517	1.00608	1.07069	1.12389	1.1031	0.0150651		11.978	1.67841	1.6471	1.58104	2.06823	1.77864	1.83347	1.96861	1.40857
	12.478	1.16155	1.06466	1.31966	1.11711	1.09367	1.09811	1.14963	1.26263	1.25294	1.03672	1.17973	1.23852	1.08183	0.994059	1.01673	1.05659	1.0051	1.01305	1.00236	0.981992	0.987198	1.0401	1.02521	1.10679	1.06169	1.04337	1.13987	1.27827	1.13337	1.06437	1.17092	1.12584	1.22337	1.00292	1.06022	1.12424	1.10318	0.0151815		12.478	1.67552	1.66232	1.60832	2.0719	1.7723	1.83931	1.96383	1.39453
	12.978	1.13525	1.0476	1.31028	1.11369	1.09159	1.09941	1.16194	1.27456	1.26243	1.04096	1.18082	1.24229	1.08466	0.995633	1.01938	1.06039	1.00292	1.0251	1.00791	0.980042	0.99378	1.04997	1.02981	1.10463	1.0568	1.04399	1.14028	1.28252	1.13214	1.06559	1.18195	1.12955	1.22157	1.00039	1.05379	1.11584	1.10387	0.0152113		12.978	1.66956	1.64989	1.61004	2.06948	1.76513	1.84043	1.95005	1.4293
	13.478	1.15033	1.04809	1.319	1.11294	1.08987	1.09914	1.16716	1.27647	1.26026	1.03738	1.17982	1.24238	1.08654	0.997369	1.02287	1.06244	1.00398	1.01715	1.01178	0.980732	0.991389	1.0464	1.03313	1.10211	1.05641	1.03977	1.13503	1.27815	1.1319	1.06766	1.18817	1.13547	1.22337	1.00051	1.04079	1.11749	1.10426	0.0153926		13.478	1.65169	1.62426	1.60483	2.07109	1.74999	1.83613	1.94113	1.39607
	13.978	1.13698	1.06922	1.312	1.11214	1.09202	1.0996	1.16996	1.27367	1.2586	1.04085	1.18461	1.24373	1.08943	0.999119	1.02059	1.05815	0.997946	1.01235	1.00989	0.977794	0.991948	1.043	1.03781	1.1	1.05656	1.03929	1.14167	1.28009	1.12859	1.06647	1.18568	1.1307	1.22205	0.999029	1.06567	1.11994	1.10464	0.0152529		13.978	1.64465	1.65128	1.61295	2.07312	1.74784	1.83912	1.93511	1.40187
	14.478	1.13571	1.05289	1.31483	1.11157	1.09168	1.09676	1.16724	1.27533	1.25694	1.04596	1.1886	1.24232	1.08562	0.99926	1.02296	1.06784	1.00233	1.0209	1.0093	0.980945	0.996856	1.04793	1.04287	1.09386	1.05758	1.03572	1.1388	1.28035	1.13185	1.06453	1.19648	1.1363	1.22117	0.998737	1.06021	1.12293	1.10542	0.0152179		14.478	1.64336	1.665	1.59962	2.06165	1.73156	1.83156	1.92348	1.37966
	14.978	1.16271	1.06712	1.31418	1.1103	1.0899	1.09832	1.17278	1.27423	1.25867	1.04522	1.18262	1.2453	1.08761	1.00056	1.02621	1.05696	0.997453	1.01838	1.0089	0.979105	0.999224	1.04702	1.04778	1.09278	1.05536	1.03725	1.13829	1.27902	1.12915	1.06484	1.18713	1.14326	1.22144	0.998096	1.06502	1.11683	1.10608	0.015232		14.978	1.64902	1.6639	1.62308	2.065	1.72175	1.83069	1.9173	1.4016
	15.478	1.15556	1.06736	1.31106	1.11002	1.09153	1.09645	1.16885	1.2714	1.25657	1.04186	1.17943	1.24508	1.08662	1.0028	1.02764	1.06362	1.00343	1.02071	1.01301	0.977824	0.996304	1.04914	1.05002	1.09508	1.05955	1.04444	1.13505	1.28042	1.13047	1.06585	1.18668	1.14338	1.21838	1.00041	1.07892	1.12036	1.10681	0.0149475		15.478	1.63547	1.65665	1.60236	2.06178	1.69972	1.81826	1.90497	1.40437
	15.978	1.13877	1.06859	1.30947	1.10951	1.09168	1.09618	1.16359	1.27707	1.2597	1.03858	1.18968	1.2396	1.08677	1.00212	1.02987	1.05958	0.997741	1.01823	1.00735	0.975639	0.99765	1.0448	1.05057	1.0895	1.05393	1.04051	1.13533	1.27924	1.13033	1.06512	1.19029	1.13685	1.21426	0.999278	1.06161	1.11665	1.1046	0.0150974		15.978	1.6336	1.66554	1.62827	2.0584	1.69415	1.8124	1.89237	1.39309
	16.478	1.17468	1.08801	1.31036	1.11242	1.09065	1.09633	1.17209	1.26876	1.26001	1.03957	1.18974	1.24401	1.08711	1.00407	1.03269	1.0626	0.998562	1.02233	1.01043	0.978369	0.997759	1.04742	1.05491	1.09526	1.0526	1.0297	1.1358	1.27811	1.13244	1.06858	1.18558	1.13224	1.2127	0.995737	1.0834	1.1212	1.1074	0.0150287		16.478	1.6121	1.63022	1.60583	2.05518	1.67708	1.80291	1.87357	1.35817
	16.978	1.12712	1.06088	1.30216	1.10568	1.09157	1.09403	1.16727	1.27077	1.25758	1.04224	1.19257	1.24247	1.08926	1.0064	1.03529	1.05088	0.999504	1.01761	1.00649	0.975353	0.998903	1.04328	1.05571	1.08002	1.05174	1.03297	1.14051	1.27869	1.13141	1.06436	1.18909	1.13404	1.2124	0.996627	1.06345	1.11396	1.1034	0.0149767		16.978	1.59629	1.60365	1.59421	2.04631	1.66044	1.78788	1.85837	1.36878
	17.478	1.16013	1.06859	1.30379	1.10885	1.08774	1.09278	1.16841	1.2691	1.25212	1.03958	1.19325	1.24036	1.08851	1.00787	1.03816	1.05651	1.00695	1.02462	1.00997	0.975586	1.00036	1.04463	1.05665	1.08676	1.05922	1.02946	1.13301	1.27868	1.12969	1.06568	1.18647	1.13724	1.21566	0.999706	1.0532	1.11426	1.1051	0.0148445		17.478	1.58852	1.62671	1.59753	2.03497	1.64156	1.78184	1.84178	1.35
	17.978	1.16075	1.10078	1.30433	1.10754	1.09264	1.0959	1.16311	1.27182	1.25897	1.04008	1.19158	1.23962	1.08791	1.00849	1.03704	1.05742	0.99908	1.01923	1.01384	0.975642	1.00206	1.04421	1.06021	1.07432	1.04943	1.03933	1.13558	1.27316	1.12818	1.06556	1.18709	1.13142	1.20957	0.998891	1.07167	1.11121	1.10577	0.0147641		17.978	1.58365	1.61272	1.58972	2.03367	1.62825	1.7698	1.82493	1.35325
	18.478	1.15861	1.05392	1.29448	1.1036	1.09034	1.0896	1.16845	1.26862	1.25739	1.0373	1.19443	1.24244	1.08944	1.00903	1.03972	1.03913	1.00398	1.01933	1.01308	0.97372	1.00158	1.04558	1.06179	1.07628	1.06222	1.035	1.13548	1.27754	1.12969	1.06333	1.19304	1.13385	1.21496	0.996082	1.06619	1.11265	1.10422	0.0148908		18.478	1.56383	1.60859	1.60071	2.03082	1.61548	1.75601	1.80916	1.33625
	18.978	1.16633	1.09629	1.2995	1.10493	1.093	1.09266	1.16767	1.26664	1.25762	1.04113	1.19868	1.24034	1.08818	1.01046	1.04081	1.0583	1.00691	1.01968	1.01468	0.974326	1.00659	1.04457	1.06598	1.07313	1.05197	1.02388	1.13694	1.28114	1.12706	1.06636	1.1915	1.13249	1.2147	0.994482	1.0544	1.11666	1.10611	0.014869		18.978	1.55815	1.60861	1.60438	2.02166	1.60281	1.74419	1.79392	1.33036
	19.478	1.15365	1.08439	1.29033	1.10996	1.09145	1.0913	1.17024	1.26499	1.2554	1.03353	1.1978	1.23997	1.08946	1.01204	1.04205	1.04809	1.00214	1.02237	1.01116	0.969736	1.00199	1.04277	1.06536	1.06878	1.04042	1.02347	1.13323	1.27245	1.12532	1.06625	1.18826	1.13609	1.21688	0.995535	1.07264	1.114	1.10399	0.0147726		19.478	1.55721	1.59728	1.59751	2.00891	1.58491	1.73042	1.76955	1.32619
	19.978	1.17773	1.08764	1.29521	1.10942	1.08996	1.09221	1.16989	1.26375	1.25907	1.03047	1.19354	1.24255	1.08742	1.01089	1.04211	1.04897	1.0026	1.01853	1.01487	0.970993	1.005	1.0447	1.06772	1.07227	1.04959	1.02901	1.13332	1.27989	1.12577	1.06586	1.18939	1.13266	1.21258	0.993951	1.08646	1.11124	1.10576	0.0148643		19.978	1.54667	1.60466	1.59191	2.02529	1.57361	1.71822	1.75118	1.33195
	20.478	1.18375	1.06484	1.28889	1.10387	1.08998	1.09099	1.16593	1.27171	1.25872	1.0292	1.19288	1.23933	1.08662	1.01004	1.04363	1.05386	1.00492	1.02015	1.01672	0.966443	1.00426	1.0435	1.06787	1.06886	1.04832	1.02629	1.13458	1.27286	1.12406	1.06609	1.19046	1.13108	1.21341	0.992015	1.07472	1.10318	1.104	0.0148799		20.478	1.52651	1.56672	1.57452	1.98642	1.55519	1.70081	1.73606	1.30818
	20.978	1.16317	1.10518	1.28968	1.10387	1.09407	1.09047	1.17093	1.27287	1.25913	1.03375	1.1931	1.23946	1.08849	1.00957	1.0461	1.05583	0.995045	1.02024	1.01445	0.964171	1.00521	1.04367	1.06705	1.06008	1.05414	1.02575	1.13625	1.27723	1.12107	1.06413	1.18565	1.13297	1.21322	0.991491	1.0832	1.10368	1.10484	0.014869		20.978	1.49405	1.53209	1.55196	1.97133	1.53964	1.69005	1.71393	1.25977
	21.478	1.1896	1.10019	1.28557	1.10895	1.09466	1.09185	1.17148	1.26951	1.25831	1.03327	1.19566	1.23594	1.08832	1.01164	1.04473	1.05326	0.99243	1.01513	1.01529	0.966712	1.00591	1.04094	1.0691	1.0641	1.04806	1.02223	1.13463	1.27654	1.12252	1.0671	1.18378	1.12678	1.20326	0.990764	1.06927	1.09945	1.10408	0.0148668		21.478	1.50907	1.52917	1.59017	1.98071	1.52792	1.67433	1.69407	1.27967
	21.978	1.18227	1.10059	1.28902	1.10819	1.09422	1.09057	1.17755	1.26675	1.26182	1.04006	1.19579	1.24029	1.0891	1.01338	1.04699	1.05531	1.0234	1.02119	1.00842	0.964473	1.00937	1.04489	1.0698	1.06142	1.04749	1.01996	1.13249	1.2678	1.12212	1.06832	1.18788	1.12966	1.20595	0.990709	1.07484	1.09845	1.10557	0.0146714		21.978	1.48194	1.53116	1.56214	1.96598	1.51504	1.66362	1.67514	1.27806
	22.478	1.18125	1.10255	1.28437	1.1064	1.09251	1.09194	1.17335	1.26167	1.25461	1.0341	1.19585	1.23664	1.08932	1.01191	1.04753	1.05121	1.02876	1.01719	1.01144	0.963859	1.0089	1.04517	1.07041	1.05976	1.04727	1.01628	1.13749	1.27102	1.11762	1.06574	1.18659	1.12916	1.20727	0.993322	1.07248	1.09667	1.10449	0.014549		22.478	1.47371	1.51495	1.54854	1.9565	1.49914	1.64899	1.65271	1.27507
	22.978	1.17187	1.08783	1.28027	1.10439	1.09289	1.0904	1.18019	1.26427	1.26347	1.03485	1.19477	1.24004	1.08635	1.01351	1.0501	1.05269	1.02852	1.00857	1.0107	0.961017	1.00824	1.04343	1.07137	1.05039	1.04729	1.01731	1.13213	1.26799	1.11986	1.06598	1.18238	1.12871	1.20527	0.989285	1.07629	1.10056	1.10342	0.0146525		22.978	1.46458	1.51323	1.54383	1.94431	1.48359	1.63539	1.63539	1.25189
	23.478	1.18393	1.10513	1.27659	1.10996	1.09332	1.0901	1.16148	1.2641	1.2555	1.0307	1.19228	1.23445	1.0864	1.01155	1.04804	1.05893	1.0458	1.01418	1.01258	0.96548	1.01354	1.04453	1.07163	1.05277	1.04307	1.02894	1.13142	1.267	1.11448	1.06537	1.18681	1.12987	1.20512	0.988924	1.0902	1.09924	1.10482	0.0142666		23.478	1.45545	1.50291	1.53584	1.92957	1.47409	1.61966	1.61797	1.25128
	23.978	1.19358	1.11568	1.279	1.10651	1.09181	1.08672	1.15864	1.26097	1.2568	1.02808	1.1891	1.23654	1.08594	1.01184	1.05095	1.05268	1.03545	1.0095	1.00838	0.962762	1.01176	1.04026	1.07411	1.04907	1.04693	1.0209	1.12983	1.26511	1.11617	1.06472	1.18192	1.12708	1.20787	0.990438	1.08149	1.0946	1.10342	0.0144641		23.978	1.44937	1.4944	1.55903	1.93313	1.46116	1.6048	1.59252	1.24118
	24.478	1.19881	1.09659	1.28072	1.10659	1.09156	1.08804	1.1686	1.25767	1.25589	1.02991	1.18999	1.2341	1.08523	1.01134	1.05173	1.05086	1.03727	1.01109	1.01232	0.964656	1.01157	1.0468	1.07272	1.05466	1.04319	1.02132	1.1347	1.26174	1.11758	1.06479	1.17762	1.12649	1.204	0.989255	1.06579	1.09326	1.10301	0.0143841		24.478	1.43847	1.48907	1.54209	1.91915	1.45079	1.59428	1.57309	1.24646
	24.978	1.19478	1.10302	1.28677	1.1047	1.09176	1.08975	1.16206	1.25671	1.25917	1.02137	1.19127	1.2353	1.08626	1.01245	1.05662	1.05008	1.04483	1.01401	1.01267	0.961544	1.0151	1.04442	1.07285	1.05456	1.03901	1.01548	1.12675	1.26405	1.11924	1.06397	1.17993	1.12137	1.20455	0.986839	1.05878	1.09393	1.10267	0.0145137		24.978	1.40682	1.46168	1.49931	1.89453	1.4427	1.57339	1.55048	1.23001
	25.478	1.20564	1.09272	1.2842	1.10602	1.09216	1.08593	1.18298	1.26542	1.26055	1.02038	1.19713	1.23913	1.08689	1.01427	1.0576	1.03626	1.02744	1.00728	1.01253	0.957192	1.01313	1.04263	1.07381	1.04701	1.04256	1.01384	1.12499	1.25832	1.11559	1.06396	1.17806	1.12586	1.20474	0.986755	1.07572	1.09567	1.10262	0.0148828		25.478	1.38901	1.4399	1.49747	1.87686	1.42722	1.55462	1.53371	1.2192
	25.978	1.20832	1.12328	1.2834	1.10954	1.09388	1.08972	1.16359	1.25621	1.25397	1.02436	1.19327	1.23067	1.08609	1.01339	1.05976	1.03963	1.03009	1.00617	1.00968	0.961302	1.0131	1.04058	1.07226	1.05213	1.04343	1.00948	1.12285	1.25672	1.11824	1.06473	1.17556	1.12661	1.20152	0.987211	1.06751	1.08804	1.10212	0.0145437		25.978	1.39192	1.43395	1.50662	1.87253	1.42217	1.54116	1.51987	1.22523
	26.478	1.19661	1.10262	1.27787	1.10753	1.09149	1.08729	1.17083	1.25593	1.25442	1.02348	1.19151	1.23659	1.08446	1.01121	1.05837	1.05218	1.04218	1.01292	1.0138	0.961165	1.01681	1.03927	1.07353	1.03468	1.03995	1.00743	1.11798	1.25421	1.10998	1.06445	1.17596	1.12351	1.2006	0.986756	1.0782	1.09342	1.10137	0.014366		26.478	1.37828	1.44791	1.51298	1.85653	1.4152	1.53036	1.50057	1.21777
	26.978	1.17731	1.11292	1.27526	1.10687	1.08965	1.08822	1.16064	1.25536	1.25749	1.01747	1.18779	1.23276	1.08523	1.01188	1.05803	1.04046	1.02791	1.00968	1.01148	0.957281	1.01496	1.04078	1.0735	1.04373	1.04457	1.01655	1.12112	1.26757	1.11347	1.06265	1.18069	1.12249	1.20118	0.98669	1.0816	1.08495	1.10056	0.0144243		26.978	1.36584	1.43533	1.50028	1.85673	1.41061	1.5132	1.47999	1.2189
	27.478	1.238	1.15576	1.29113	1.112	1.09319	1.09007	1.1724	1.26311	1.25782	1.02412	1.18751	1.23188	1.08453	1.01154	1.05768	1.04817	1.02927	1.00488	1.012	0.957309	1.01288	1.03853	1.07384	1.03253	1.042	0.997207	1.11963	1.25663	1.1137	1.06188	1.17917	1.12209	1.20139	0.985608	1.08769	1.08958	1.1038	0.0151234		27.478	1.35129	1.43365	1.48186	1.84034	1.40175	1.49832	1.46338	1.20744
	27.978	1.215	1.11347	1.27961	1.10871	1.08924	1.09045	1.16997	1.25156	1.25651	1.02478	1.18796	1.2348	1.08632	1.01329	1.0592	1.05286	1.02613	1.01373	1.00997	0.959888	1.01673	1.03835	1.07313	1.03848	1.04085	1.00377	1.11806	1.26443	1.11426	1.06366	1.17769	1.11828	1.20216	0.987072	1.09401	1.0904	1.10236	0.0145972		27.978	1.33447	1.39494	1.45801	1.81974	1.39424	1.48359	1.44449	1.19861
	28.478	1.22561	1.11278	1.28045	1.10752	1.08984	1.08873	1.17286	1.25958	1.2572	1.01973	1.19335	1.23514	1.08637	1.01347	1.06073	1.05629	1.04272	1.0177	1.01281	0.957158	1.01537	1.03861	1.07481	1.03957	1.04745	1.0208	1.12056	1.25964	1.10961	1.06259	1.17647	1.12242	1.20018	0.985516	1.10248	1.08899	1.10431	0.0145703		28.478	1.32863	1.39202	1.45839	1.80793	1.38729	1.46874	1.43144	1.19126
	28.978	1.21575	1.11874	1.28247	1.10623	1.09135	1.08825	1.15984	1.25005	1.24829	1.01606	1.19093	1.23275	1.08689	1.01304	1.05933	1.05068	1.04175	1.01512	1.01498	0.960046	1.01574	1.03902	1.07582	1.03616	1.05355	1.00807	1.11607	1.26205	1.10959	1.06094	1.1781	1.12326	1.20166	0.984931	1.11207	1.08858	1.103	0.0144184		28.978	1.31646	1.38379	1.4421	1.79484	1.37839	1.45215	1.41225	1.20243
	29.478	1.19806	1.13205	1.28131	1.11019	1.09195	1.08894	1.17818	1.2517	1.25741	1.01926	1.18891	1.23248	1.084	1.01337	1.05825	1.04548	1.03392	1.012	1.01477	0.959949	1.02124	1.04009	1.07524	1.03884	1.03225	1.0004	1.11588	1.25664	1.10865	1.05797	1.16175	1.11715	1.19619	0.985324	1.13773	1.08718	1.10235	0.0144841		29.478	1.30245	1.40206	1.42262	1.78754	1.37242	1.4392	1.39626	1.17873
	29.978	1.20412	1.13076	1.27983	1.10904	1.09319	1.09048	1.17334	1.2512	1.25703	1.01969	1.18935	1.23026	1.08279	1.01238	1.05845	1.04328	1.04039	1.01173	1.0152	0.956613	1.01357	1.03918	1.07648	1.03472	1.03958	0.999582	1.11778	1.2594	1.103	1.06037	1.1703	1.11591	1.19944	0.983238	1.11197	1.0868	1.10168	0.0145463		29.978	1.29853	1.3681	1.40791	1.76907	1.36984	1.42393	1.38534	1.18124
	30.478	1.20211	1.12015	1.27079	1.10582	1.08715	1.08814	1.16166	1.25154	1.25205	1.02076	1.18811	1.22911	1.08388	1.0117	1.05778	1.04815	1.03121	1.00238	1.01236	0.956282	1.01718	1.04214	1.07692	1.03163	1.03737	0.999634	1.11241	1.25452	1.11034	1.06014	1.17528	1.11895	1.19756	0.982201	1.11802	1.08805	1.1001	0.0143949		30.478	1.28103	1.38176	1.42701	1.76729	1.36935	1.41111	1.36904	1.19549
	30.978	1.22423	1.11337	1.27384	1.10747	1.08585	1.088	1.17085	1.25722	1.25085	1.01876	1.18782	1.22741	1.08013	1.0109	1.05746	1.038	1.02519	1.00104	1.01569	0.952949	1.01379	1.0408	1.07882	1.0413	1.04688	1.00308	1.10868	1.25463	1.10593	1.05798	1.17384	1.12316	1.19436	0.981765	1.12179	1.08847	1.10062	0.0146298		30.978	1.27788	1.40647	1.41128	1.75463	1.36379	1.39954	1.35655	1.19275
	31.478	1.20328	1.11618	1.2688	1.10715	1.08513	1.08624	1.16476	1.25287	1.25066	1.0178	1.18636	1.22675	1.08317	1.01045	1.0585	1.04487	1.0272	1.00076	1.01424	0.95651	1.02003	1.04227	1.07765	1.03184	1.04142	1.00612	1.11248	1.24951	1.10037	1.05408	1.16203	1.11664	1.19527	0.983003	1.12697	1.0905	1.09922	0.0142541		31.478	1.25705	1.36111	1.40495	1.7405	1.35505	1.38525	1.33778	1.17187
	31.978	1.21446	1.11488	1.27185	1.10519	1.0847	1.09134	1.1611	1.24591	1.25229	1.01666	1.18492	1.22829	1.08327	1.0108	1.0573	1.04757	1.03409	1.0016	1.01196	0.955976	1.01876	1.04247	1.0759	1.03247	1.03867	0.996274	1.10329	1.24381	1.10455	1.05393	1.16266	1.11888	1.1923	0.982201	1.13424	1.08929	1.099	0.0143008		31.978	1.24611	1.36825	1.39049	1.73096	1.35117	1.3731	1.32674	1.16555
	32.478	1.20686	1.12272	1.26986	1.10389	1.08304	1.08829	1.16352	1.24627	1.25327	1.01386	1.18647	1.22634	1.08157	1.00871	1.05754	1.03847	1.02259	1.00258	1.00668	0.952752	1.01601	1.04095	1.07844	1.02344	1.0382	0.995967	1.11065	1.24613	1.09947	1.05041	1.16206	1.11789	1.19355	0.981086	1.10896	1.08448	1.09675	0.0144635		32.478	1.24195	1.36518	1.39021	1.73359	1.34623	1.36017	1.31351	1.17994
	32.978	1.19208	1.13377	1.27411	1.10686	1.08218	1.08682	1.15475	1.24019	1.25524	1.00809	1.18435	1.22971	1.08038	1.01035	1.05765	1.03985	1.02157	1.00195	1.01213	0.952729	1.01978	1.0429	1.07722	1.03039	1.03727	0.99232	1.10675	1.24361	1.09946	1.05353	1.15696	1.11511	1.19011	0.980487	1.12946	1.08682	1.09686	0.0143261		32.978	1.23975	1.38123	1.38013	1.7153	1.34888	1.34829	1.30547	1.18964
	33.478	1.25742	1.19324	1.27646	1.10854	1.07973	1.0895	1.1711	1.24953	1.25463	1.01129	1.18191	1.22813	1.08186	1.00908	1.05958	1.03768	1.02316	1.00136	1.01007	0.950115	1.01845	1.03789	1.08098	1.02704	1.02964	0.987687	1.10139	1.24062	1.09614	1.05144	1.16377	1.12117	1.19026	0.979453	1.1308	1.0834	1.1004	0.015227		33.478	1.22005	1.36494	1.35804	1.70109	1.34119	1.33804	1.29443	1.175
	33.978	1.20226	1.12914	1.27184	1.10471	1.07818	1.08875	1.15455	1.23822	1.25051	1.00665	1.17586	1.22341	1.0814	1.00845	1.05634	1.04996	1.01751	0.998643	1.00961	0.953615	1.02144	1.04096	1.08007	1.02778	1.03761	0.991568	1.10371	1.24958	1.10014	1.05091	1.16159	1.11452	1.18694	0.979465	1.12453	1.08142	1.09588	0.0143055		33.978	1.20917	1.35143	1.34869	1.69027	1.33999	1.32408	1.28009	1.18319
	34.478	1.2108	1.11949	1.27417	1.10003	1.08019	1.0882	1.16066	1.24377	1.25405	1.00909	1.18744	1.23052	1.07884	1.00851	1.05642	1.05072	1.01922	0.998096	1.00907	0.950096	1.01677	1.03584	1.07656	1.02812	1.02896	0.988591	1.09792	1.24558	1.10001	1.04781	1.15711	1.11707	1.1899	0.981003	1.11767	1.08089	1.09553	0.0146179		34.478	1.20945	1.36104	1.36319	1.68366	1.34173	1.3138	1.26652	1.1806
	34.978	1.23785	1.15477	1.27056	1.10359	1.07713	1.09077	1.15703	1.24625	1.24964	1.01073	1.18299	1.2304	1.08004	1.0072	1.05729	1.04766	1.01269	0.995353	1.01003	0.952362	1.0223	1.04106	1.07895	1.02404	1.03967	0.979763	1.09965	1.23786	1.09454	1.04729	1.15722	1.12022	1.18527	0.978009	1.1358	1.08136	1.09715	0.0147857		34.978	1.19886	1.35891	1.33788	1.66598	1.34065	1.30218	1.25604	1.16287
	35.478	1.19068	1.11502	1.26266	1.10063	1.07708	1.08502	1.148	1.23918	1.25079	1.0067	1.18158	1.22571	1.07881	1.00671	1.05747	1.03959	1.02184	1.00554	1.01297	0.953447	1.02103	1.04112	1.0764	1.02801	1.04503	0.985702	1.10006	1.2329	1.09788	1.04832	1.1504	1.11658	1.18274	0.97759	1.12864	1.07875	1.09363	0.0139797		35.478	1.18908	1.38291	1.312	1.65279	1.33596	1.29137	1.24443	1.17193
	35.978	1.28112	1.17732	1.26983	1.10709	1.08055	1.09058	1.16232	1.25058	1.25091	1.00729	1.179	1.22632	1.07779	1.00598	1.05669	1.04064	1.02464	0.998269	1.00831	0.945968	1.01644	1.03779	1.07398	1.02581	1.03919	0.983972	1.10074	1.23556	1.09938	1.048	1.15378	1.11679	1.18462	0.97783	1.11531	1.07646	1.09797	0.015232		35.978	1.17521	1.37105	1.33003	1.64708	1.32858	1.27892	1.23294	1.17258
	36.478	1.2189	1.13714	1.26174	1.10237	1.07821	1.08598	1.1594	1.2366	1.24414	1.00472	1.17731	1.22865	1.0777	1.00263	1.05572	1.05106	1.02458	1.00378	1.01378	0.950506	1.0237	1.04429	1.07521	1.02646	1.04516	0.984668	1.09657	1.24021	1.09861	1.04874	1.14915	1.1146	1.18487	0.977593	1.11098	1.07783	1.09482	0.0141984		36.478	1.17408	1.36427	1.31922	1.63903	1.32658	1.26681	1.22867	1.16999
	36.978	1.25868	1.17796	1.26424	1.10524	1.0776	1.08844	1.15576	1.23777	1.24739	1.00853	1.17335	1.22815	1.07584	1.00333	1.05563	1.05017	1.00916	0.997995	1.00625	0.948013	1.02117	1.03899	1.07406	1.01934	1.03866	0.980368	1.09602	1.23165	1.09811	1.05096	1.15249	1.11583	1.18734	0.977866	1.13763	1.07669	1.0963	0.0149009		36.978	1.16691	1.36452	1.31278	1.63125	1.32345	1.25988	1.21878	1.18073
	37.478	1.20694	1.14348	1.25658	1.10319	1.07307	1.08332	1.15995	1.23888	1.24572	1.00532	1.17225	1.22282	1.07736	1.00476	1.05733	1.03828	1.0019	0.997891	1.01009	0.947547	1.02069	1.03808	1.07279	1.02259	1.04141	0.974946	1.09584	1.23381	1.09711	1.04962	1.14773	1.11242	1.18165	0.976255	1.11918	1.07042	1.0917	0.0143206		37.478	1.16028	1.37168	1.29229	1.62144	1.31457	1.24814	1.20829	1.17828
	37.978	1.2091	1.11626	1.25981	1.10045	1.07491	1.08458	1.14234	1.22341	1.2457	1.00209	1.17092	1.22204	1.07448	1.00365	1.05454	1.04231	1.0284	0.997171	1.00772	0.949893	1.02463	1.03899	1.07317	1.0237	1.03761	0.977583	1.09421	1.2321	1.09549	1.04876	1.14541	1.11592	1.18285	0.977517	1.12708	1.07245	1.09104	0.0139769		37.978	1.15528	1.38094	1.30787	1.61587	1.31898	1.24324	1.20147	1.16527
	38.478	1.222	1.14675	1.25513	1.09864	1.0751	1.08406	1.15145	1.23289	1.24817	1.00244	1.17386	1.22195	1.07362	1.00344	1.05528	1.04671	1.02876	1.00261	1.01258	0.950438	1.02659	1.03994	1.07737	1.02508	1.04348	0.985126	1.09028	1.22662	1.09564	1.04841	1.14257	1.11239	1.17883	0.978374	1.11702	1.07434	1.093	0.0139735		38.478	1.14166	1.37751	1.27839	1.60295	1.30988	1.2313	1.19227	1.17475
	38.978	1.18646	1.10639	1.25401	1.09699	1.06947	1.08247	1.15313	1.23053	1.24339	1.0064	1.17445	1.22174	1.0752	1.00413	1.05579	1.04213	1.01872	1.00086	1.01173	0.950915	1.02509	1.04039	1.07461	1.02109	1.03399	0.980711	1.09505	1.22961	1.09227	1.04852	1.13798	1.11425	1.18059	0.976619	1.11535	1.07188	1.08953	0.0137492		38.978	1.14234	1.36453	1.26841	1.59695	1.30736	1.22303	1.18657	1.17511
	39.478	1.21415	1.13824	1.25004	1.09767	1.07202	1.08377	1.14677	1.23409	1.24349	1.00285	1.16914	1.22198	1.07247	1.00331	1.0535	1.04059	1.01947	0.995195	1.0074	0.949102	1.02438	1.03782	1.0739	1.02079	1.03422	0.976779	1.09173	1.2211	1.08974	1.04828	1.14782	1.11695	1.17723	0.976903	1.11673	1.06806	1.08993	0.0140134		39.478	1.13168	1.37559	1.30045	1.58657	1.30668	1.21491	1.17854	1.16463
	39.978	1.20551	1.12381	1.25322	1.09221	1.06749	1.08258	1.14358	1.23389	1.24247	1.00262	1.16189	1.21859	1.06915	1.00171	1.05492	1.04429	1.0259	0.996789	1.00849	0.949278	1.02274	1.03904	1.07476	1.01862	1.0412	0.976439	1.08567	1.21704	1.09083	1.0497	1.14207	1.11425	1.17838	0.976243	1.1083	1.06833	1.08839	0.0137702		39.978	1.13134	1.39209	1.26002	1.57668	1.3021	1.20907	1.17135	1.17558
	40.478	1.28544	1.18693	1.25749	1.09697	1.06984	1.08353	1.13943	1.2246	1.24493	1.00283	1.15699	1.222	1.07182	0.999452	1.05345	1.05125	1.01924	1.00439	1.0063	0.946312	1.02399	1.03782	1.07344	1.01906	1.03789	0.967115	1.09039	1.21883	1.08995	1.04905	1.14262	1.11265	1.17103	0.974377	1.13134	1.0701	1.09258	0.0147769		40.478	1.12309	1.36662	1.25651	1.57979	1.30105	1.19882	1.16249	1.19381
	40.978	1.28185	1.19484	1.25537	1.09501	1.07159	1.08448	1.14618	1.22358	1.2402	1.00262	1.16363	1.22225	1.07033	1.00198	1.0532	1.04962	1.02538	0.998503	1.00934	0.950646	1.02505	1.04303	1.07548	1.01699	1.03992	0.970827	1.08943	1.21491	1.08907	1.04973	1.13896	1.11145	1.17105	0.975405	1.098	1.0667	1.09213	0.0145882		40.978	1.11687	1.36654	1.23326	1.55711	1.2965	1.19125	1.15722	1.16364
	41.478	1.17871	1.12953	1.2508	1.0917	1.06629	1.08022	1.15761	1.22332	1.24206	1.0019	1.16445	1.22313	1.07084	0.999946	1.05316	1.04794	1.02289	0.999558	1.0064	0.947583	1.02719	1.03803	1.07187	1.01703	1.04904	0.968336	1.08765	1.21554	1.08816	1.04422	1.13423	1.11217	1.17037	0.976336	1.10996	1.06964	1.08716	0.0135984		41.478	1.11708	1.37471	1.23558	1.55093	1.29249	1.18414	1.15136	1.16536
	41.978	1.20298	1.15026	1.24463	1.08865	1.06237	1.07993	1.13705	1.21598	1.24173	0.997626	1.1609	1.21987	1.06795	0.997764	1.05027	1.04621	1.03226	0.995068	1.01011	0.947527	1.02469	1.04194	1.07416	1.01911	1.03567	0.96519	1.08946	1.21285	1.0846	1.0446	1.13783	1.10826	1.16702	0.97537	1.12042	1.06199	1.08645	0.0136491		41.978	1.11383	1.40247	1.2482	1.54817	1.29699	1.18066	1.14958	1.18382
																																									42.478	1.11019	1.37367	1.2498	1.5464	1.29543	1.17496	1.14537	1.18908
[truncated: 67 more columns]

## Sheet: Figure 4D
	protrusion length (μm)				protrusion persistance (min)				Morphological distribution (width:height)
pmEMBer	-	+			-	+			-	+
	4.215	8.33			3.50948	48.2553			0.973684	0.914894
	3.136	5.88			3.75003	27.9154			0.97561	0.95
	1.569	3.921			5.50005	15.7013			0.952381	1
	2.548	3.43			14.238	12.7624			0.969697	0.532258
	4.247	3.528			6.12633	21.6695			0.97561	0.837209
	2.744	3.138			4.12693	26.6253			0.894737	0.532258
	2.561	2.94			16.0644	7.24535			0.974359	0.808511
	4.377	10.503			3.73212	23.3419			0.930233	0.860465
	2.941	10			9.06047	23.1774			0.971429	0.804348
	2.809	7.504			7.39725	21.8462			0.85	0.659091
	2.549	11			8.04348	10.8963			0.755556	0.974359
	2.225	2.452			24.3781	5.35477			0.657143	0.491803
	6.471	2.55			5.61555	35.6985			0.928571	0.921053
	2.29	2.844			24.3177	22.0078			0.972222	1
	3.017	1.47			0.154517	5.30008			0.714286	0.95122
	2.157	9.119			0.104233	7.75013			0.9	0.197917
	8.298	5.979			1.41667	6.49732			1	0.563636
	3.725	8.919			0	4.66715			0.723404	0.948718
	6.142	9.706			16.3077	14.5256			0.645833	0.966667
	5.227	5.979			10.669	32.8296			0.704545	1
	2.597	15.974			11.0948	35.0343			0.970588	0.857143
	3.139	4.508			7.05977	25.6532			0.903226	0.868421
	5.031	1.767			5.35477	15.6229			0.810811	0.903226
	2.418	3.724			8.7114	35.7457			0.833333	0.833333
	3.397	3.332			4.86797	9.2361			0.882353	0.3
	4.573	8.433			4.61325	39.3787			0.852941	0.388889
	1.914	8.037			3.45402	11.6832			0.935484	0.666667
	1.912	8.628			5.49062	15.4873			0.953488	0.62
	4.181	12.677			2.41188	18.7134			0.921053	0.95122
	7.589	6.377			3.15972	8.45385			0.783784	0.804348
	1.519	9.605			12.3117	40.9054			0.780488	0.551724
	1.568	3.005			6.37415	41.1797			0.970588	0.6
	0	5.553			7.0649	14.9157			0.860465	0.585238
	3.92	7.057			5.35227	37.7014			0.972973	0.88109
	6.143	5.979			0	29.6381			0.947368	0.520364
	1.573	9.279			22.6641	37.8004			0.914286	0.793742
	6.664	6.578			12.5794	20.8871			0.622642	0.766435
	5.783	6.174			11.8331	38.1382			0.62069	0.91675
	6.143	6.371			39.0287	39.8891			0.880952	0.446733
	4.312	9.017			13.0756	40.3816			0.911765	0.967298
	2.844	5.293			11.72	28.6938			0.829268	0.986195
	1.078	8.037			17.7926	38.6721			0.785714	0.430454
	1.666	5.292			23.7808	28.5531			0.972222	0.44637
	1.568	4.215			29.2748	27.6456			0.6	0.51061
	3.235				21.0474	30.9437			0.857143	0.417246
	7.057				7.22932	31.6406			0.784314	0.844186
	2.744				14.1898	38.9438			0.902439	0.89967
	10.78				10.4114	40.0797			0.972973	0.428441
	1.764				11.0305	40.0145			0.978723	0.425549
	2.156				13.6388	36.2456			0.8	0.408342
	2.55				9.1473				0.794118	0.822737
	0				24.0908				0.972222	0.460565
	0				8.74162				0.697674	0.328439
	1.767				28.3569				0.829268	0.424436
	6.763				14.57				0.925	0.532606
	0.98				7.23407				0.8	0.375248
	3.789				0				0.970588	0.495458
	2.417				0				0.64
	7.252				25.9625				0.970588
	0.49				32.2909				0.970588
	1.568				20.1965				0.925926
	6.599				11.4115				0.933333
	2.287				12.2265				0.972222
	3.528				7.33595				0.918919
					24.5087				0.533333
					13.626				0.781818
					10.4322				0.968524
					36.2385				0.871732
					8.64538				0.964033
					17.7379				0.798323
									0.710615
Protrusion Length Analysis				Protrusion Persistance Analysis					0.77783
Identify Outliers				Identify Outliers					0.642283
Method				Method					0.891617
ROUT (Q = 1%)				ROUT (Q = 1%)					0.946063
									0.726477
Number of points				Number of points					0.733797
# Y values analyzed	68	50		# Y values analyzed	70	50			0.664106
Outliers	4	6		Outliers	0	0			0.895943
									0.764238
#33	17.248								0.453808
#39	11.767								0.958959
#52	11.564								0.682383
#59	11.368								0.928968
#6		64.827							0.719274
#13		22.667							0.640979
#14		20.669							0.844752
#19		21.011							0.385431
#20		19.667							0.56
#42		28.485							0.759
									0.854373
Unpaired t test with Welch's correction				Unpaired t test with Welch's correction					0.535658
P value	<0.0001			P value	<0.0001				0.628631
P value summary	****			P value summary	****				0.759496
Significantly different (P < 0.05)?	Yes			Significantly different (P < 0.05)?	Yes				0.713344
One- or two-tailed P value?	Two-tailed			One- or two-tailed P value?	Two-tailed				0.797605
Welch-corrected t, df	t=5.424 df=71.39			Welch-corrected t, df	t=6.648 df=85.23				0.482884
									0.570399
How big is the difference?				How big is the difference?					0.578398
Mean ± SEM of column A	3.477 ± 0.2761, n=64			Mean ± SEM of column A	11.77 ± 1.086, n=70				0.817359
Mean ± SEM of column B	6.457 ± 0.475, n=44			Mean ± SEM of column B	25.44 ± 1.746, n=50				0.927504
Difference between means	2.98 ± 0.5494			Difference between means	13.67 ± 2.056				0.756098
95% confidence interval	1.885 to 4.076			95% confidence interval	9.581 to 17.76				0.928632
R squared (eta squared)	0.2918			R squared (eta squared)	0.3415
								Morphological Distribution Analysis
F test to compare variances				F test to compare variances				Identify Outliers
F, DFn, Dfd	2.035, 43, 63			F, DFn, Dfd	1.844, 49, 69			Method
P value	0.01			P value	0.0191			ROUT (Q = 1%)
P value summary	**			P value summary	*
Significantly different (P < 0.05)?	Yes			Significantly different (P < 0.05)?	Yes			Number of points
								# Y values analyzed	103	57
								Outliers	1	0
								#88	0.385431
								Unpaired t test with Welch's correction
								P value	0.0002
								P value summary	***
								Significantly different (P < 0.05)?	Yes
								One- or two-tailed P value?	Two-tailed
								Welch-corrected t, df	t=3.873 df=80
								How big is the difference?
								Mean ± SEM of column A	0.8209 ± 0.01399, n=103
								Mean ± SEM of column B	0.6908 ± 0.03056, n=57
								Difference between means	-0.1302 ± 0.03361
								95% confidence interval	-0.1971 to -0.06329
								R squared (eta squared)	0.1579
								F test to compare variances
								F, DFn, Dfd	2.641, 56, 102
								P value	<0.0001
								P value summary	****
								Significantly different (P < 0.05)?	Yes

## Sheet: Figure 4 - Supplement 1E,F
	Max Y/C Ratio																SAM40
	Cytoplasm		Plasma Membrane		Nucleus												Cytoplasm		Plasma Membrane		Nucleus
pmEMBer	-	+	-	+	-	+										pmEMBer	-	+	-	+	-	+
	1.51549	1.70221	1.23425	1.18298	1.45369	1.72605											0.278622	0.187038	0.81526	0.784693	0.442708	0.235705
	1.47319	1.7017	1.17063	1.27707	1.46009	1.78811											0.490632	0.558773	0.740798	0.844147	0.262777	0.476673
	1.72313	1.63097	1.12636	1.26347	1.59747	1.54043											0.611421	0.412089	0.838342	0.920289	0.157274	0.595529
	1.71097	2.09883	1.31873	1.04596	2.10695	1.95677											0.381215	0.524813	0.69767	0.057034	0.245649	0.15079
	1.87362	1.81701	1.17797	1.19868	1.53332	1.79079											0.447589	0.369762	0.778106	0.814851	0.857294	0.22515
	1.57337	1.84043	1.13154	1.2479	1.78958	1.97216											0.424115	0.248768	0.729129	0.881796	0.525893	0.24473
	1.74468	2.01695	1.10987	1.08946	1.83088	1.75993											0.463908	0.168498	0.884459	0.772974	0.43835	0.422677
	1.7865	1.4293	1.25266	1.01427	1.46737	1.01103											0.31402	0.408979	0.855246	0.11954	0.65308	-2.23642
	1.54559	1.77472	1.2556	1.06073	1.65287	1.76446											0.363479	0.532219	0.883096	0.904281	0.924711	0.412137
	1.46688	1.86093	1.28849	1.0724	1.80028	1.49942											0.557656	0.503771	0.580888	0.611774	0.0295829	0.269501
	1.47361	1.80592	1.38846	1.0458	1.47056	2.05528											0.471583	0.616201	0.721275	0.565519	0.117049	0.324276
	1.91609	1.57459	1.33453	1.02832	1.78915	1.81413											0.386482	0.60377	0.76923	-0.11336	0.259382	0.304237
	1.56264	1.72641	1.29942	1.01672	1.70656	1.66534											0.161648	0.054918	0.88804	0.507654	0.285942	0.425265
	1.84553	1.68184	1.2695	1.03136	1.42038	1.29744											0.439848	0.261314	0.882366	-1.61758	0.175779	0.197235
	1.73257	1.76428	1.25159	1.02719	1.79	1.53024											0.330796	0.413957	0.84708	0.83641	0.261046	0.035361
	1.73281	1.42704	1.1411	1.04997	1.64796	1.63235											0.640052	0.20574	0.81752	0.781344	0.396743	0.179414
	1.43155	1.83204	1.25976	1.08098	1.86031	1.62625											0.766716	0.366726	0.960271	0.923109	0.558615	0.234391
	1.73486	1.87714	1.20459	1.10679	1.41596	1.02158											0.505134	0.457926	0.778987	0.174392	0.14647	0.779331
	1.84423	2.12177	1.37316	1.06597	1.67761	2.01039											0.449594	0.387297	0.871163	0.624578	0.374955	0.262028
	1.71752	1.8079	1.26753	1.05299	1.59511	1.5645											0.364552	0.21313	0.909869	-0.44461	0.565761	0.255399
	1.74481	1.8516	1.26694	1.1498	1.98306	1.23276											0.547121	0.51829	0.917338	0.571896	0.487927	0.255271
	1.63964	1.96354	1.22913	1.28883	1.80614	1.26642											0.749859	0.4175	0.76267	0.751444	0.474265	0.584843
	1.41589	1.39303	1.17349	1.13623	1.47089	1.4456											0.60178	0.154554	0.628109	0.666754	0.085065	0.294952
	1.78904	1.76549	1.29672	1.06858	1.54918	1.59896											0.627182	0.553795	0.880638	0.724801	0.369967	0.292473
	1.94568	2.00848	1.2945	1.19648	1.61883	2.01973											0.608025	0.701216	0.787164	0.723087	0.177715	0.226005
	1.97021	1.66778	1.36748	1.14338	1.8563	1.86715											0.464132	0.170004	0.87672	0.796843	0.165387	0.331233
	1.585	1.54627	1.3129	1.23032	1.61243	1.78284											0.570222	0.120412	0.932206	0.774515	0.361498	0.084977
	1.8032	1.37955	1.27997	1.01696	1.36182	1.94353											0.457533	0.688942	0.882243	-1.40053	0.039463	0.045499
	1.57481	1.50563	1.32752	1.28544	1.83752	1.91212											0.357342	0.430183	0.769625	0.71997	0.257243	0.294802
	2.01191	1.42695	1.24926	1.19484		1.54694											0.316137	0.499167	0.596987	0.635434		0.124425
	2.02353	1.78188	1.27439	1.32465		1.88319											0.203665	0.411345	0.694765	0.779972		0.299149
	1.85248	1.79422	1.29498	1.11831		2.04577											0.451972	0.343664	0.75964	0.779325		0.16431
	1.89666	1.93823	1.16645	1.09466		1.55694											0.326089	0.43899	0.613892	0.712934		0.264124
	1.82329	1.92857	1.28507	1.1077		1.93033											0.230206	0.804674	0.810212	0.766765		0.31561
	1.93354	1.75313	1.32712	1.13773													0.454571	0.50419	0.868651	0.836495
	1.78911	1.96791	1.33161	1.1281													0.806929	0.528011	0.803952	0.547337
	1.99102	1.73373	1.1821														0.542825	0.395904	0.8588
	1.58941		1.167														0.407478		0.796118
	1.88711		1.20033														0.608314		0.689847
	1.67227		1.19993														0.440361		0.787357
	1.62641		1.19524														0.353734		0.63844
	1.94168		1.18927														0.61154		0.69905
	1.8835		1.26633														0.481827		0.647151
	1.97752		1.2334														0.509979		0.749384
	1.68211		1.18974														0.544436		0.390534
	1.61827		1.15012														0.517612		0.821536
	1.76538		1.23636														0.592362		0.757745
	1.49866		1.32885														0.63432		0.682936
	1.91104		1.24552														0.375222		0.773506
	1.96534		1.16596														0.557326		0.692974
	2.01948		1.16085														0.664663		0.603457
	1.90251		1.17822														0.668842		0.335972
	1.9549		1.17231														0.385089		0.753006
	1.64472		1.23236														0.656574		0.858036
	1.4805		1.22669														0.479863		0.697425
	1.56884		1.32933														0.557352		0.834104
	1.59627		1.31531														0.371002		0.849063
	1.78356		1.21304														0.455462		0.821218
	1.94928		1.12548														0.240948		0.807318
	1.86402		1.13553														0.283055		0.942369
	1.98088		1.29171														0.290842		0.659806
	1.80152		1.32098														0.464623		0.804311
	1.59971		1.23823														0.308194		0.768631
	1.39613		1.31252														0.471232		0.848832
	1.73592		1.25871														0.421048		0.736273
	1.90193		1.20774														0.424832		0.61172
	1.72957		1.21051														0.348266		0.864173
	2.02883		1.13218														0.543448		0.459697
	2.13781		1.1958														0.228368		0.654465
	2.08094		1.35929														0.275167		0.856013
	2.11232		1.37749														0.376857		0.888816
	1.45123																0.802907
	1.64931																0.869469
	1.74317																0.642033
	1.80026																0.584456
	1.54436																0.6079
	1.98352																0.426052
	1.8274																0.282976
	2.03083																0.385734
	1.61443																0.173609
	1.48573																0.354361
	1.22843																0.265342
																Identify Outliers
1-Way ANOVA with Multiple Comarisons																Method
Number of families	1															ROUT (Q = 1%)
Number of comparisons per family	15
Alpha	0.05															Number of points
																# Y values analyzed	83	37	71	36	29	34
Tukey's multiple comparisons test	Mean Diff.	95.00% CI of diff.	Significant?	Summary	Adjusted P Value											Outliers	1	0	2	6	0	1
Cytoplasm vs. Cyto + EMB	-0.008669	-0.1107 to 0.09341	No	ns	0.9999											#96	-0.51345
Cytoplasm vs. Plasma membrane	0.502	0.4185 to 0.5855	Yes	****	<0.0001											#50			0.390534
Cytoplasm vs. PM + EMB	0.6181	0.515 to 0.7211	Yes	****	<0.0001											#57			0.335972
Cytoplasm vs. Nucleus	0.08456	-0.02683 to 0.196	No	ns	0.2512											#4				0.057034
Cytoplasm vs. Nucl + EMB	0.06713	-0.03802 to 0.1723	No	ns	0.447											#8				0.11954
Cyto + EMB vs. Plasma membrane	0.5107	0.4059 to 0.6154	Yes	****	<0.0001											#12				-0.11336
Cyto + EMB vs. PM + EMB	0.6267	0.5059 to 0.7476	Yes	****	<0.0001											#14				-1.61758
Cyto + EMB vs. Nucleus	0.09323	-0.03484 to 0.2213	No	ns	0.2961											#20				-0.44461
Cyto + EMB vs. Nucl + EMB	0.0758	-0.04688 to 0.1985	No	ns	0.4851											#28				-1.40053
Plasma membrane vs. PM + EMB	0.1161	0.01044 to 0.2218	Yes	*	0.0219											#8						-2.23642
Plasma membrane vs. Nucleus	-0.4174	-0.5312 to -0.3036	Yes	****	<0.0001
Plasma membrane vs. Nucl + EMB	-0.4349	-0.5426 to -0.3272	Yes	****	<0.0001											1-Way ANOVA with Multiple Comparisons
PM + EMB vs. Nucleus	-0.5335	-0.6624 to -0.4047	Yes	****	<0.0001											Number of families	1
PM + EMB vs. Nucl + EMB	-0.551	-0.6744 to -0.4275	Yes	****	<0.0001											Number of comparisons per family	15
Nucleus vs. Nucl + EMB	-0.01744	-0.148 to 0.1131	No	ns	0.9989											Alpha	0.05
																Tukey's multiple comparisons test	Mean Diff.	95.00% CI of diff.	Significant?	Summary	Adjusted P Value
Test details	Mean 1	Mean 2	Mean Diff.	SE of diff.	n1	n2	q	DF
																Cytoplasm vs. Cyto + EMB	0.05458	-0.03317 to 0.1423	No	ns	0.4771
Cytoplasm vs. Cyto + EMB	1.745	1.754	-0.008669	0.03558	83	37	0.3446	284								Cytoplasm vs. Plasma membrane	-0.3142	-0.3866 to -0.2418	Yes	****	<0.0001
Cytoplasm vs. Plasma membrane	1.745	1.243	0.502	0.02909	83	71	24.4	284								Cytoplasm vs. PM + EMB	-0.2598	-0.3543 to -0.1652	Yes	****	<0.0001
Cytoplasm vs. PM + EMB	1.745	1.127	0.6181	0.03592	83	36	24.34	284								Cytoplasm vs. Nucleus	0.1166	0.02084 to 0.2123	Yes	**	0.0072
Cytoplasm vs. Nucleus	1.745	1.661	0.08456	0.03882	83	29	3.08	284								Cytoplasm vs. Nucl + EMB	0.1736	0.08228 to 0.265	Yes	****	<0.0001
Cytoplasm vs. Nucl + EMB	1.745	1.678	0.06713	0.03665	83	34	2.591	284								Cyto + EMB vs. Plasma membrane	-0.3688	-0.459 to -0.2785	Yes	****	<0.0001
Cyto + EMB vs. Plasma membrane	1.754	1.243	0.5107	0.03649	37	71	19.79	284								Cyto + EMB vs. PM + EMB	-0.3143	-0.4232 to -0.2055	Yes	****	<0.0001
Cyto + EMB vs. PM + EMB	1.754	1.127	0.6267	0.04213	37	36	21.04	284								Cyto + EMB vs. Nucleus	0.06198	-0.0479 to 0.1719	No	ns	0.5867
Cyto + EMB vs. Nucleus	1.754	1.661	0.09323	0.04464	37	29	2.954	284								Cyto + EMB vs. Nucl + EMB	0.119	0.01296 to 0.2251	Yes	*	0.0178
Cyto + EMB vs. Nucl + EMB	1.754	1.678	0.0758	0.04276	37	34	2.507	284								Plasma membrane vs. PM + EMB	0.05443	-0.04246 to 0.1513	No	ns	0.5911
Plasma membrane vs. PM + EMB	1.243	1.127	0.1161	0.03682	71	36	4.459	284								Plasma membrane vs. Nucleus	0.4308	0.3327 to 0.5288	Yes	****	<0.0001
Plasma membrane vs. Nucleus	1.243	1.661	-0.4174	0.03966	71	29	14.88	284								Plasma membrane vs. Nucl + EMB	0.4878	0.394 to 0.5816	Yes	****	<0.0001
Plasma membrane vs. Nucl + EMB	1.243	1.678	-0.4349	0.03754	71	34	16.38	284								PM + EMB vs. Nucleus	0.3763	0.2609 to 0.4917	Yes	****	<0.0001
PM + EMB vs. Nucleus	1.127	1.661	-0.5335	0.04491	36	29	16.8	284								PM + EMB vs. Nucl + EMB	0.4334	0.3216 to 0.5451	Yes	****	<0.0001
PM + EMB vs. Nucl + EMB	1.127	1.678	-0.551	0.04304	36	34	18.1	284								Nucleus vs. Nucl + EMB	0.05706	-0.05571 to 0.1698	No	ns	0.695
Nucleus vs. Nucl + EMB	1.661	1.678	-0.01744	0.04549	29	34	0.542	284
																Test details	Mean 1	Mean 2	Mean Diff.	SE of diff.	n1	n2	q	DF
																Cytoplasm vs. Cyto + EMB	0.4648	0.4102	0.05458	0.03057	82	37	2.525	274
																Cytoplasm vs. Plasma membrane	0.4648	0.7789	-0.3142	0.02522	82	69	17.62	274
																Cytoplasm vs. PM + EMB	0.4648	0.7245	-0.2598	0.03294	82	30	11.15	274
																Cytoplasm vs. Nucleus	0.4648	0.3482	0.1166	0.03335	82	29	4.942	274
																Cytoplasm vs. Nucl + EMB	0.4648	0.2911	0.1736	0.03182	82	33	7.715	274
																Cyto + EMB vs. Plasma membrane	0.4102	0.7789	-0.3688	0.03146	37	69	16.58	274
																Cyto + EMB vs. PM + EMB	0.4102	0.7245	-0.3143	0.03793	37	30	11.72	274
																Cyto + EMB vs. Nucleus	0.4102	0.3482	0.06198	0.03829	37	29	2.29	274
																Cyto + EMB vs. Nucl + EMB	0.4102	0.2911	0.119	0.03696	37	33	4.555	274
																Plasma membrane vs. PM + EMB	0.7789	0.7245	0.05443	0.03376	69	30	2.28	274
																Plasma membrane vs. Nucleus	0.7789	0.3482	0.4308	0.03416	69	29	17.83	274
																Plasma membrane vs. Nucl + EMB	0.7789	0.2911	0.4878	0.03267	69	33	21.11	274
																PM + EMB vs. Nucleus	0.7245	0.3482	0.3763	0.0402	30	29	13.24	274
																PM + EMB vs. Nucl + EMB	0.7245	0.2911	0.4334	0.03894	30	33	15.74	274
																Nucleus vs. Nucl + EMB	0.3482	0.2911	0.05706	0.03929	29	33	2.054	274

## Sheet: Figure 4E, F4 - Supplement 3
		Rac1-2G control (no pmEMBer)																													Rac-2G + pmEMBer
	Time (min)	Cell 1	Cell 2	Cell 3	Cell 4	Cell 5	Cell 6	Cell 7	Cell 8	Cell 9	Cell 10	Cell 11	Cell 12	Cell 13	Cell 14	Cell 15	Cell 16	Cell 17	Cell 18	Cell 19	Cell 20	Cell 21	Cell 22	Cell 23	Cell 24	AVERAGE	SEM			Time (min)	Cell 1	Cell 2	Cell 3	Cell 4	Cell 5	Cell 6	Cell 7	Cell 8	Cell 9	Cell 10	Cell 11	Cell 12	Cell 13	Cell 14	Cell 15	Cell 16	Cell 17	Cell 18	Cell 19
	-5.2491	1.08527	1.03541	0.987435	1.03611	1.03779	1.01619	1.03895	0.994261	1.00004	1.00631	1.00473	1.0153	1.01555	1.0097	1.01945	1.01871	1.01238	1.01018	1.01197	1.00259	0.987705	0.990785	1.00482	1.04819	1.01624	0.00451313			-3.63307	0.976282	1.0054	1.00589	1.00076	1.00463	1.00545	0.985719	0.998558	0.968178	0.965892	0.966858	0.977934	1.01488	1.01111	1.02529	1.02446	1.019	1.00375	0.983182
	-4.7491	1.07982	1.03365	0.991741	1.03228	1.03162	1.00394	1.03876	0.993741	1.00246	1.00852	1.00768	1.01647	1.02056	1.00986	1.02078	1.02159	1.01279	1.00948	1.01063	1.00168	0.992975	0.992397	0.997807	1.04599	1.01572	0.00418409			-3.13307	0.9839	0.999413	1.00633	1.00164	1.004	1.00146	0.990032	0.997104	0.973769	0.973295	0.974744	0.979299	1.00967	1.00512	0.999691	1.02635	1.02285	1.00229	0.970225
	-4.2491	1.06891	1.03328	0.989588	1.02588	1.02715	1.01066	1.04219	0.988858	0.997866	1.005	1.01314	1.01184	1.02125	1.00644	1.02508	1.01852	1.00995	1.00668	1.00879	1.00118	0.985324	0.99268	0.999085	1.04195	1.0138	0.00400993			-2.63307	0.989405	1.01243	1.00529	0.997643	1.00003	0.99934	0.988477	1.01059	0.977936	0.974928	0.979394	0.982169	1.00497	1.00254	1.00836	1.01555	1.02189	1.00565	0.986362
	-3.7491	1.05737	1.02494	0.991652	1.02373	1.02564	1.00807	1.03035	0.990812	1.00034	1.00292	1.00722	1.01495	1.0213	1.00397	1.01915	1.0183	1.01197	1.00899	1.01272	1.00102	0.991088	0.989138	1.00541	1.03337	1.01227	0.00325397			-2.13307	0.990512	1.00076	1.00561	1.00499	0.997288	0.99644	0.991772	1.01207	0.975686	0.977835	0.981792	0.986894	1.00515	1.00464	1.00101	1.0204	1.02257	1.00255	0.988098
	-3.2491	1.04988	1.0172	0.988245	1.01862	1.0186	1.00258	1.03155	0.987732	0.996606	1.00185	1.00448	1.01109	1.01536	1.00229	1.02063	1.01425	1.00406	1.007	1.007	0.998229	0.995872	0.987487	1.00319	1.027	1.00878	0.00300171			-1.63307	0.996536	1.00748	1.01014	1.00424	1.00017	0.990491	0.983134	0.986731	0.978128	0.976134	0.980796	0.9879	1.00365	1.00183	1.01595	1.03766	1.01989	1.01264	0.983698
	-2.7491	1.04605	1.01082	0.98741	1.01833	1.01883	1.00081	1.0255	0.988877	0.992154	1.0009	1.00432	1.00698	1.01703	0.995312	1.02311	1.02186	1.00477	1.00372	1.00656	0.996928	0.993741	0.994695	1.00117	1.03403	1.00808	0.00302869			-1.1871	0.992269	1.00048	1.00254	1.00209	0.99446	0.991522	0.994002	0.986134	0.982452	0.977767	0.985793	0.988667	0.998807	0.993777	1.02445	1.0258	1.00608	1.00267	0.990823
	-2.2491	1.03194	1.01843	0.985528	1.00947	1.01605	0.999017	1.02099	0.983955	0.990363	1.00078	1.00657	1.01566	1.02041	1.0027	1.02652	1.02024	1.00504	1.00629	1.01016	0.998322	0.992033	0.996853	1.002	1.02352	1.00762	0.00267265			0	1	1	1	1	1	1	1	1	1	1	1	1	1	1	1	1	1	1	1
	-1.7491	1.02595	1.0061	0.985524	1.00481	1.0139	1.00909	1.0232	0.987227	0.99038	1.00224	1.00509	1.01837	1.01627	0.996642	1.02272	1.01605	1.0018	1.00855	1.00833	0.998274	0.987744	0.990541	0.991655	1.01053	1.00504	0.00247822			0.485167	1.00358	1.0071	1.01074	1.00925	1.03395	1.03012	1.00057	1.00481	1.00999	1.00887	1.01914	1.01754	1.00437	0.995706	1.00693	1.02557	1.00535	1.01216	0.988273
	0	1	1	1	1	1	1	1	1	1	1	1	1	1	1	1	1	1	1	1	1	1	1	1	1	1	0			0.985167	1.01703	1.00915	1.03107	1.02104	1.06193	1.07049	1.00358	1.01778	1.01949	1.01275	1.02709	1.02885	0.996622	0.994302	1.03128	1.0518	1.01531	1.04138	1.0107
	0.485133	0.988695	1.00285	1.01895	1.00028	0.99905	1.00025	1.00352	1.01649	1.01748	0.996294	0.996272	0.998147	1.0078	1.00067	0.995966	1.00259	0.996521	1.00027	0.999566	0.997093	1.02087	1.02718	1.00354	0.992752	1.00346	0.00198433			1.48517	1.02841	1.00527	1.04046	1.0325	1.08179	1.08309	1.0166	1.02534	1.0256	1.018	1.03311	1.03849	0.999145	0.996118	1.01329	1.02888	1.02709	1.05948	1.02137
	0.985133	0.984728	0.998205	1.02287	1.00186	1.00212	1.00044	1.0121	1.03513	1.03214	0.997874	1.00098	0.999821	0.999437	0.994696	1.00003	0.996801	0.999033	0.99791	0.998377	0.995182	1.02333	1.03571	1.00763	0.993206	1.0054	0.00284893			1.98517	1.02794	1.01792	1.04507	1.03892	1.07983	1.09371	1.01879	1.03346	1.02759	1.02357	1.03876	1.03352	0.994436	1.00221	1.04388	1.03576	1.05685	1.08964	1.04947
	1.48513	1.00615	1.02647	1.05061	1.01694	1.01502	1.00694	1.02289	1.04875	1.04434	0.995555	0.999864	0.999441	1.0106	0.999898	1.00643	1.00107	0.996035	0.996999	0.993904	0.99367	1.03256	1.04665	1.00431	0.995739	1.01295	0.00386629			2.48517	1.03973	1.04335	1.05537	1.04637	1.0821	1.0992	1.02796	1.03803	1.03441	1.02903	1.03702	1.03838	0.99828	1.00848	1.0473	1.05677	1.06534	1.09104	1.04361
	1.98513	0.979832	1.00691	1.03167	1.00458	0.998113	1.00272	1.02611	1.05871	1.05014	0.995851	0.994557	1.00261	1.00561	0.992385	1.00364	0.99778	0.996539	0.997135	0.992982	0.991233	1.03984	1.05222	1.00263	0.996106	1.00916	0.00441528			2.98517	1.03563	1.04261	1.04836	1.04485	1.07416	1.08585	1.0246	1.04147	1.03699	1.02898	1.03175	1.03185	0.996892	1.00648	1.04674	1.06494	1.09038	1.11576	1.07829
	2.48513	0.989378	1.01904	1.03316	1.00831	0.999598	1.00616	1.01861	1.06488	1.05797	0.998699	1.00267	0.998046	1.01314	0.997251	1.01035	1.00408	0.993944	1.00047	0.996613	0.991034	1.02905	1.04134	0.991852	1.00344	1.01121	0.00418274			3.48517	1.0355	1.04559	1.04381	1.0424	1.07269	1.08428	1.01923	1.03955	1.02933	1.02463	1.03111	1.02438	0.999258	1.01317	1.06388	1.06958	1.09089	1.11688	1.06115
	2.98513	0.978453	1.00951	1.03065	1.00935	0.998467	1.00462	1.01416	1.0671	1.06276	0.997632	0.997392	0.999795	1.01197	0.991846	1.00412	1.00825	0.992856	0.997908	0.992532	0.987399	1.03296	1.03406	0.996718	0.996025	1.00902	0.00449303			3.98517	1.0328	1.04673	1.04063	1.04495	1.06997	1.07559	1.01878	1.03487	1.0355	1.02704	1.03043	1.02765	0.997519	1.01689	1.07551	1.06941	1.08133	1.12522	1.07108
	3.48513	0.982803	1.01452	1.03269	1.00514	0.994183	0.997587	1.01252	1.06476	1.06286	0.992591	0.996238	0.997735	1.01426	0.99272	1.00544	1.00615	0.996606	0.999037	0.996075	0.985137	1.02137	1.03091	0.995636	0.991697	1.00786	0.00438364			4.48517	1.02852	1.04957	1.0322	1.03834	1.06137	1.06725	1.0177	1.03241	1.0315	1.02594	1.02225	1.01885	0.995596	1.02535	1.05902	1.06608	1.08857	1.11426	1.05106
	3.98513	0.978522	1.01637	1.03173	1.00568	0.991778	1.00222	1.03964	1.06596	1.06113	0.988427	0.997977	0.998375	1.01152	0.987266	1.00493	1.00779	0.993423	0.997296	0.993192	0.985649	1.02265	1.02592	0.997312	0.978405	1.00763	0.00477449			4.98517	1.02313	1.04048	1.02744	1.04171	1.06193	1.05722	1.01215	1.03056	1.02328	1.02009	1.01774	1.01199	0.996439	1.02684	1.06795	1.05878	1.09199	1.12405	1.06262
	4.48513	0.972271	1.01148	1.02305	1.00043	0.987656	0.998592	1.02979	1.06206	1.06092	0.984913	0.996247	0.993666	1.0056	0.986795	1.00902	1.00348	0.99367	0.998476	0.995096	0.982754	1.0245	1.01545	0.990817	0.981736	1.00452	0.00461332			5.48517	1.01949	1.04973	1.027	1.03962	1.04772	1.05575	1.012	1.03227	1.0211	1.02058	1.01692	1.009	1.00071	1.02462	1.04805	1.05216	1.07432	1.10484	1.04545
	4.98513	0.981253	1.01555	1.02091	0.995811	0.988642	0.999226	1.03699	1.05901	1.05803	0.987199	0.998322	0.992782	1.01855	0.985097	1.00403	1.00595	0.989438	0.995748	0.995152	0.980881	1.02078	1.01737	0.998442	0.97421	1.00497	0.00457581			5.98517	1.00979	1.04453	1.01106	1.02941	1.03498	1.03964	1.00574	1.02418	1.01376	1.01583	1.01251	1.00885	1.0033	1.02755	1.05514	1.06971	1.08054	1.11713	1.05234
	5.48513	0.975193	1.01797	1.02173	0.996414	0.988466	0.99983	1.02884	1.0553	1.05707	0.992296	0.989648	0.9923	1.00898	0.988684	1.0057	1.00895	0.995811	0.998267	0.99402	0.97889	1.01126	1.01629	0.994744	0.974392	1.00379	0.00435774			6.48517	1.00951	1.04339	1.01533	1.02361	1.03732	1.03991	0.99664	1.02329	1.00647	1.01221	1.01022	1.00301	1.01086	1.03133	1.0273	1.02438	1.06736	1.10678	1.03719
	5.98513	0.978702	1.01681	1.02153	0.997397	0.987911	1.00309	1.03092	1.05164	1.05324	0.98815	0.992263	0.998699	1.00941	0.987315	1.00686	1.00202	0.992742	0.992135	0.991421	0.978696	1.00595	1.01112	0.997637	0.970872	1.00277	0.00421196			6.98517	1.00495	1.05307	1.00858	1.02371	1.0243	1.03112	0.997674	1.02009	1.00777	1.00444	1.00685	1.00085	1.01411	1.03243	1.04913	1.03877	1.05613	1.10675	1.04552
	6.48513	0.966719	1.01753	1.0151	0.993782	0.988024	1.00466	1.0223	1.04755	1.04871	0.985433	0.993144	1.00209	1.01583	0.990155	1.01151	1.00571	0.993418	0.996503	0.991588	0.976214	1.00286	1.00189	0.992544	0.962852	1.00109	0.00422737			7.48517	0.998609	1.04552	1.00439	1.02492	1.02102	1.02506	0.990539	1.03225	0.995549	1.00415	1.00498	0.998659	1.00322	1.02997	1.0463	1.04634	1.0499	1.09731	1.03354
	6.98513	0.974012	1.01114	1.01136	0.988828	0.98516	1.00382	1.03218	1.04862	1.04666	0.989921	0.98949	1.00365	1.01449	0.990732	1.00798	1.00432	0.992925	0.994471	0.98933	0.975363	1.0053	1.0132	0.994586	0.970593	1.00159	0.00410588			7.98517	0.990712	1.03564	1.00093	1.0145	1.01357	1.01595	0.991153	1.0343	0.999963	1.00082	1.00416	0.986888	1.00319	1.03607	1.01625	1.03484	1.03222	1.09478	1.00981
	7.48513	0.97686	1.03046	1.0167	0.98908	0.986451	0.998653	1.03903	1.03984	1.04079	0.986272	0.998141	1.00371	1.01365	0.98478	1.01043	1.00533	0.994573	0.990407	0.987406	0.974774	0.991445	0.998387	0.996492	0.960658	1.0006	0.00428309			8.48517	0.986202	1.03222	0.996839	1.00846	1.00693	1.00249	0.985174	1.02371	0.99357	0.999868	1.00203	0.991772	1.00225	1.03308	1.01829	1.03044	1.01817	1.08377	1.02626
	7.98513	0.968887	1.02121	1.01019	0.985687	0.984411	0.995514	1.0377	1.03587	1.03449	0.989384	0.993006	0.999475	1.00344	0.990699	1.0038	1.00675	0.993186	0.993765	0.99139	0.97316	0.991917	0.997481	0.992104	0.958057	0.997982	0.00401157			8.98517	0.990743	1.0369	0.99586	1.0167	1.00465	1.00105	0.986668	1.02487	0.991755	0.9937	0.999157	0.988842	1.00212	1.03674	1.04554	1.04425	1.04013	1.08766	1.03867
	8.48513	0.970772	1.01455	1.00518	0.990145	0.983272	1.00565	1.03435	1.03349	1.03488	0.98273	0.98944	1.00109	1.00851	0.983151	1.00703	1.00906	0.984748	0.992927	0.988691	0.970833	0.994459	1.00094	0.994901	0.953778	0.997273	0.0040814			9.48517	0.988795	1.03653	0.991915	1.01093	0.999173	1.00048	0.988244	1.00768	0.989955	0.993744	0.997214	0.988495	1.00319	1.03461	1.03414	1.03423	1.06139	1.08057	1.02424
	8.98513	0.957551	1.00934	1.00495	0.988111	0.979927	1.00717	1.03466	1.03377	1.03469	0.983713	0.993297	0.998259	1.00662	0.982412	1.00179	1.00297	0.985929	0.991621	0.990595	0.969713	0.988194	0.996154	0.997201	0.949719	0.995349	0.00429396			9.98517	0.980541	1.02849	0.994868	1.00594	0.985471	0.992728	0.977747	1.0004	0.980939	0.989634	0.990657	0.981868	1.00263	1.02377	1.04241	1.04906	1.03937	1.07913	1.02783
	9.48513	0.974196	1.01781	1.00485	0.986014	0.979487	1.00708	1.03042	1.02918	1.0314	0.981976	0.999805	0.996222	0.999224	0.983254	1.0087	1.00472	0.98921	0.993825	0.989717	0.965751	0.986681	1.00775	0.991976	0.943335	0.995941	0.00419297			10.4852	0.977055	1.02549	0.98644	1.0005	0.981204	0.986435	0.978663	0.998053	0.980093	0.985125	0.990043	0.984602	0.999849	1.02815	1.03058	1.03212	1.03363	1.05828	1.01604
	9.98513	0.966166	1.0113	0.998614	0.985924	0.977556	0.993563	1.02729	1.02431	1.02501	0.982323	0.999636	0.996876	1.00313	0.986183	1.00922	0.999735	0.98777	0.991942	0.987447	0.965586	0.988621	0.996273	0.992387	0.952037	0.993704	0.0037334			10.9852	0.974621	1.00499	0.981663	0.991358	0.976288	0.986259	0.978164	0.993525	0.97607	0.984806	0.988509	0.982672	1.00312	1.02579	1.0165	1.03909	1.03105	1.06058	0.997064
	10.4851	0.961287	1.0091	0.997194	0.989693	0.97968	0.998092	1.04709	1.02056	1.02181	0.985727	0.996307	0.994609	0.998279	0.980695	1.00109	1.00311	0.981225	0.992215	0.990397	0.968336	0.983875	0.993167	0.989377	0.947978	0.992954	0.0041053			11.4852	0.973541	1.0047	0.981831	0.991495	0.968345	0.974374	0.977265	0.995913	0.980353	0.984196	0.989083	0.986046	0.99817	1.02564	1.02233	1.02503	1.03023	1.05335	0.992701
	10.9851	0.953999	1.00645	0.999805	0.979575	0.977251	0.992586	1.04037	1.01735	1.01796	0.975578	1.00085	1.00473	0.999927	0.984785	1.00415	0.999546	0.984578	0.990722	0.990958	0.965642	0.982821	0.990972	0.987818	0.951872	0.991679	0.00404583			11.9852	0.970421	1.00506	0.979122	0.988997	0.965388	0.977077	0.985595	0.994141	0.973776	0.978328	0.986947	0.983763	1.0028	1.0192	1.03214	1.03603	1.03498	1.05916	1.01069
	11.4851	0.954874	1.01089	0.996719	0.981348	0.976572	0.994619	1.03264	1.01685	1.01313	0.983769	0.998808	1.0021	1.00548	0.985804	1.00055	1.00134	0.982825	0.989843	0.99075	0.964732	0.98446	0.998015	0.990456	0.937898	0.991436	0.00409945			12.4852	0.970353	1.00544	0.979671	0.986975	0.960085	0.970475	0.97102	0.985353	0.968774	0.972102	0.983305	0.975373	1.00045	1.01837	1.02501	1.03018	1.04788	1.05134	0.986061
	11.9851	0.963379	1.01812	0.999331	0.982918	0.980601	0.992098	1.03426	1.01195	1.01114	0.989491	0.991565	0.998899	0.994731	0.982346	1.00485	1.00124	0.980014	0.989408	0.98851	0.96224	0.973904	0.991478	0.98815	0.938052	0.990361	0.00402881			12.9852	0.973748	1.00195	0.98188	0.987652	0.967012	0.97492	0.974397	0.983222	0.964472	0.973724	0.981829	0.976201	0.991746	1.01518	1.02395	1.0391	1.02658	1.05526	0.994396
	12.4851	0.953966	1.00411	0.992506	0.982209	0.977049	1.00036	1.04588	1.00878	1.00998	0.985995	0.998384	1.00618	1.00073	0.978948	1.00284	1.00134	0.976689	0.994109	0.98731	0.964694	0.968929	1.00034	0.990456	0.945092	0.990703	0.00425425			13.4852	0.965884	1.00209	0.979534	0.986348	0.954075	0.967355	0.981071	0.988231	0.971757	0.97217	0.978241	0.977557	0.994144	1.01211	1.03452	1.04812	1.02913	1.04946	0.994633
	12.9851	0.960601	1.00157	0.992042	0.979656	0.978312	0.998346	1.05485	1.00725	1.00532	0.984611	0.998441	0.998461	1.00272	0.983091	1.0008	1.00568	0.981948	0.99209	0.988821	0.963651	0.975117	0.995496	0.993622	0.942792	0.991054	0.00426243			13.9852	0.963914	1.00033	0.972311	0.98095	0.951933	0.960821	0.974599	0.985663	0.964932	0.969688	0.977716	0.977137	0.990669	1.00561	1.01814	1.03416	1.01379	1.03423	0.987987
	13.4851	0.954323	1.00078	0.987956	0.977826	0.974618	0.998152	1.05218	1.00609	1.00483	0.979415	1.00012	0.999542	0.999605	0.985313	0.99658	1.0028	0.979256	0.992584	0.987457	0.961025	0.974557	0.990928	0.986953	0.932148	0.988543	0.00453035			14.4852	0.969034	0.995924	0.979737	0.985612	0.948426	0.959496	0.966417	0.981126	0.960898	0.970035	0.979575	0.97618	0.994584	1.0093	1.03624	1.04405	1.02381	1.0397	0.990155
	13.9851	0.952166	0.997534	0.985228	0.977488	0.975386	0.994615	1.05228	1.00227	1.0012	0.983887	0.993002	0.998491	0.995993	0.97485	0.999162	1.0034	0.978344	0.9915	0.989211	0.961667	0.982191	0.986007	0.991832	0.942656	0.987932	0.00422739			14.9852	0.964502	0.994358	0.972471	0.984026	0.947797	0.955824	0.969116	0.980659	0.963417	0.965065	0.978607	0.977096	0.991205	1.00568	1.01997	1.03708	1.01463	1.04697	0.98787
	14.4851	0.955222	1.00438	0.98767	0.978819	0.979529	0.990482	1.04721	0.998289	0.996237	0.988908	1.00118	0.999868	1.00657	0.981322	0.999606	1.01058	0.982222	0.991743	0.98852	0.961625	0.969395	0.988682	0.995854	0.942317	0.989426	0.0041971			15.4852	0.965864	1.00055	0.971799	0.980625	0.946283	0.952782	0.966295	0.973751	0.949703	0.95722	0.973368	0.970949	0.987529	0.999219	1.02716	1.03158	1.0216	1.0371	0.992514
	14.9851	0.959831	0.995846	0.985958	0.980206	0.979677	0.993917	1.05993	0.999397	0.994938	0.990178	0.994337	1.00221	1.00057	0.978371	1.00613	1.01014	0.97781	0.992504	0.990207	0.959898	0.973385	0.987643	0.995467	0.936534	0.989379	0.00456121			15.9852	0.963608	0.993471	0.971238	0.978711	0.939575	0.95111	0.970835	0.977538	0.953396	0.956278	0.974392	0.965566	0.988256	0.995816	1.00902	1.03411	1.02121	1.0231	0.992323
	15.4851	0.958699	1.00021	0.984277	0.979173	0.980095	1.00189	1.05128	0.99236	0.992624	0.984419	0.994769	1.00047	0.998933	0.979899	1.00382	1.00508	0.978424	0.991137	0.987657	0.958679	0.972681	0.995383	0.995947	0.931308	0.988301	0.00443689			16.4852	0.958155	0.998702	0.967733	0.974964	0.942557	0.954989	0.965491	0.971113	0.945691	0.953224	0.970004	0.968356	0.989417	0.999411	1.03381	1.02959	1.01162	1.02733	0.985561
	15.9851	0.9596	1.00694	0.98564	0.979452	0.983408	1.00069	1.05431	0.99269	0.989629	0.979584	0.991885	0.998474	1.00045	0.978738	1.00152	1.00357	0.972319	0.991275	0.98449	0.957241	0.973508	0.988757	0.997533	0.930945	0.98761	0.0045599			16.9852	0.960444	0.985648	0.966774	0.968714	0.939656	0.953498	0.972892	0.973378	0.948455	0.955563	0.971074	0.969861	0.978787	0.99452	1.02015	1.01696	1.02373	1.01685	0.999747
	16.4851	0.961695	0.997136	0.985191	0.980401	0.977495	0.999974	1.05939	0.986697	0.985146	0.982402	0.997368	1.00405	1.00849	0.980191	1.00589	1.00672	0.977037	0.993446	0.98759	0.955907	0.972562	0.98408	1.00057	0.934199	0.988484	0.00470313			17.4852	0.964548	0.990664	0.969182	0.971395	0.939538	0.949081	0.961069	0.967852	0.944844	0.952885	0.96768	0.968033	0.980333	0.990655	1.05536	1.05686	1.04367	1.04855	1.03031
	16.9851	0.963218	1.00077	0.981722	0.977389	0.976889	1.00653	1.05895	0.986201	0.983289	0.976996	0.991026	0.995918	1.00271	0.977314	1.00026	1.00006	0.976337	0.991737	0.987324	0.95398	0.973871	0.988526	0.997557	0.928539	0.986546	0.00473161			17.9852	0.961203	0.989715	0.966015	0.970048	0.944471	0.943653	0.962588	0.966499	0.94174	0.952572	0.964899	0.962821	0.979018	0.988428	1.03115	1.04061	1.02012	1.02186	0.995809
	17.4851	0.970827	1.00394	0.980264	0.975343	0.972876	0.996986	1.06529	0.981722	0.980922	0.982804	0.994494	0.997083	0.999815	0.975657	1.00522	1.00103	0.976267	0.989861	0.984562	0.956452	0.976647	0.986563	0.997182	0.931721	0.986814	0.004768			18.4852	0.956589	0.983849	0.96948	0.96905	0.936612	0.943439	0.960522	0.974836	0.9409	0.952589	0.964159	0.963863	0.97576	0.985424	1.02272	1.03146	1.01946	1.01893	0.996341
	17.9851	0.962808	1.00493	0.978164	0.976207	0.972957	0.993971	1.05971	0.979718	0.97747	0.984843	0.992673	0.993711	1.00883	0.976079	1.00403	0.999813	0.973146	0.988037	0.983702	0.953431	0.970513	0.983382	0.996474	0.931169	0.98524	0.00478863			18.9852	0.958624	0.985034	0.966321	0.966982	0.935838	0.937076	0.959134	0.973788	0.934422	0.946774	0.964007	0.961083	0.977626	0.987703	1.00508	1.02792	1.00058	1.01005	0.981864
	18.4851	1.02956	0.992566	0.978735	0.976351	0.969931	0.998179	1.05658	0.976458	0.973979	0.986519	0.9884	0.997036	1.0009	0.980849	1.00225	0.995136	0.974076	0.988478	0.985948	0.953692	0.977568	0.976908	0.998023	0.934459	0.987191	0.00476768			19.4852	0.955107	0.98392	0.967709	0.967385	0.931902	0.944861	0.969049	0.975582	0.939897	0.947807	0.964681	0.962648	0.969993	0.982181	1.03028	1.0231	1.00515	1.01015	0.9849
	18.9851	1.04281	1.00432	0.975021	0.977273	0.97319	0.98758	1.05528	0.972391	0.97007	0.985741	0.990281	0.995572	0.999353	0.977405	1.00033	1.0073	0.97369	0.986827	0.986553	0.952067	0.977029	0.984308	0.991771	0.932497	0.987444	0.00511081			19.9852	0.941269	0.978367	0.965173	0.965422	0.929004	0.935509	0.958633	0.975419	0.935205	0.94514	0.960413	0.963566	0.974564	0.978133	1.01979	1.02991	1.01861	1.00523	1.00109
	19.4851	1.03673	1.00506	0.974666	0.976895	0.968241	0.99669	1.06009	0.970352	0.968287	0.991935	0.998256	0.999106	0.998372	0.976685	1.00104	1.0005	0.975407	0.989456	0.985471	0.953898	0.976752	0.98926	1.00599	0.928674	0.988659	0.00528633			20.4852	0.956327	0.98244	0.964024	0.962058	0.924282	0.93474	0.963567	0.962878	0.935265	0.950246	0.959779	0.964041	0.972964	0.978843	1.03295	1.05733	1.01627	1.00085	1.00422
	19.9851	1.03971	1.00601	0.978319	0.975739	0.975899	0.995116	1.06613	0.965436	0.966029	0.984929	0.998675	1.00223	0.99869	0.973314	1.0023	1.00007	0.971312	0.991023	0.983623	0.951076	0.970116	0.984405	0.997888	0.927624	0.987735	0.00559586			20.9852	0.95688	0.987087	0.96118	0.961069	0.929982	0.940314	0.957237	0.962208	0.932051	0.944607	0.959618	0.959596	0.968643	0.977977	1.00396	1.01876	0.997945	0.997323	0.975248
	20.4851	1.03983	1.00966	0.975929	0.973911	0.976339	1.00431	1.06639	0.968912	0.964488	0.988393	0.990714	0.996314	1.00703	0.972914	1.00094	1.00364	0.971686	0.991793	0.987004	0.953874	0.966559	0.977629	0.995565	0.925786	0.987901	0.0057078			21.4852	0.957776	0.984753	0.962061	0.964359	0.921618	0.933096	0.964613	0.959556	0.930155	0.944314	0.958527	0.958037	0.97657	0.974967	1.01181	1.03262	1.00714	1.01297	0.988917
	20.9851	1.03872	0.996066	0.973614	0.97655	0.973546	0.990032	1.05926	0.962399	0.959132	0.984671	0.99491	1.00537	0.99933	0.973484	0.999851	0.997987	0.967567	0.987142	0.983786	0.949854	0.971494	0.974158	0.995744	0.930768	0.985226	0.00541759			21.9852	0.959605	0.979755	0.96056	0.963385	0.923894	0.93369	0.958714	0.964797	0.926814	0.940383	0.957924	0.952368	0.97383	0.97605	1.01317	1.03581	1.0097	1.00368	0.989179
	21.4851	1.04103	1.00656	0.974009	0.977344	0.968531	0.992333	1.06488	0.959978	0.961455	0.975679	0.997449	1.00509	1.00331	0.975844	1.00066	0.99737	0.965148	0.990158	0.984425	0.946722	0.975117	0.985708	0.994618	0.9322	0.986484	0.00570157			22.4852	0.955409	0.979058	0.956311	0.956739	0.922426	0.926152	0.95709	0.968918	0.926511	0.940578	0.956003	0.952907	0.963951	0.969528	1.01757	1.03407	1.01485	0.999146	0.976673
	21.9851	1.04287	0.999398	0.974578	0.977285	0.968095	1.00433	1.07433	0.957825	0.956227	0.971661	0.991197	1.00477	0.997654	0.969849	0.994501	0.989584	0.959245	0.987449	0.98219	0.943745	0.965691	0.973079	0.991557	0.928178	0.983553	0.00619051			22.9852	0.954871	0.980568	0.953571	0.96075	0.924957	0.927471	0.962186	0.966868	0.927997	0.942396	0.958507	0.95485	0.971236	0.973593	1.01629	1.02207	1.01326	0.993028	0.977217
	22.4851	1.04107	0.989257	0.970987	0.97521	0.970586	1.0049	1.07459	0.955939	0.953586	0.979115	0.993983	1.00191	0.998636	0.969551	0.999893	0.994086	0.960838	0.988725	0.982095	0.94543	0.971877	0.977862	0.997698	0.936318	0.984756	0.00601487			23.4852	0.952088	0.977892	0.953156	0.950432	0.917108	0.925411	0.949026	0.96228	0.920883	0.936714	0.954146	0.946677	0.968223	0.974966	1.00152	1.00978	0.990543	0.983084	0.978945
	22.9851	1.0429	0.993755	0.974977	0.976667	0.969588	1.00235	1.06365	0.951929	0.952387	0.972691	0.981296	0.993906	0.994175	0.967334	0.994925	0.983105	0.956335	0.981584	0.976262	0.938777	0.970339	0.979714	0.995613	0.927188	0.980894	0.00595328
	23.4851	1.05145	1.00489	0.973109	0.97831	0.971952	0.997291	1.07188	0.952947	0.949373	0.973846	0.991718	1.00537	1.00455	0.967538	0.998768	0.993137	0.960653	0.988294	0.979771	0.944271	0.971971	0.981091	0.99429	0.930288	0.984865	0.00634798
	23.9851	1.04718	0.996101	0.973571	0.975115	0.974557	0.99146	1.05884	0.947785	0.948563	0.979546	0.990588	1.01295	0.99795	0.966409	0.998942	0.999403	0.961782	0.991661	0.98337	0.942974	0.967503	0.9744	0.994924	0.928437	0.9835	0.00606494				1.03973	1.05307	1.05537	1.04637	1.0821	1.0992	1.02796	1.04147	1.03699	1.02903	1.03876	1.03849	1.01411	1.03674	1.07551	1.06971	1.09199	1.12522	1.07829
	24.4851	1.05394	1.00142	0.97079	0.974434	0.969927	0.989821	1.06495	0.947953	0.946686	0.982812	0.992612	1.00889	1.0003	0.9702	0.999425	0.996923	0.958334	0.987381	0.982062	0.939972	0.97159	0.978588	1.00021	0.924467	0.983904	0.00646841
	24.9851	1.05797	1.00264	0.971443	0.977422	0.969521	0.990209	1.07191	0.944573	0.94392	0.9744	0.989464	1.01932	1.00358	0.966167	0.994016	0.995955	0.96295	0.987095	0.980385	0.937816	0.977575	0.978712	1.00058	0.922126	0.984156	0.00689482
	25.4851	1.05238	0.992134	0.968021	0.974744	0.971632	0.991237	1.06485	0.945559	0.943667	0.980363	0.9896	1.02426	1.00678	0.976739	1.00738	1.00238	0.965245	0.991316	0.986332	0.940162	0.9686	0.970486	0.99653	0.926045	0.984852	0.00663509
	25.9851	1.05644	1.00024	0.967103	0.976708	0.971773	0.986956	1.06709	0.943812	0.942521	0.979814	0.991456	1.00704	1.00064	0.965359	1.00044	0.994765	0.961564	0.986188	0.980581	0.936236	0.969191	0.975011	1.00059	0.925265	0.982783	0.00668295
	26.4851	1.05649	0.994527	0.966628	0.978831	0.971634	0.987464	1.07555	0.939864	0.939732	0.975561	0.98336	1.00796	1.00504	0.971881	1.00007	1.00281	0.962999	0.990602	0.982244	0.933764	0.977159	0.972581	1.00613	0.932254	0.983964	0.00690933			Identify Outliers
	26.9851	1.06057	1.00355	0.971428	0.970076	0.970879	0.998164	1.06915	0.939949	0.939049	0.979101	0.986868	1.00806	1.0031	0.96805	0.998633	1.00209	0.95981	0.986467	0.980905	0.930639	0.974718	0.968807	0.998615	0.929077	0.98324	0.00698546			Method
	27.4851	1.0574	0.996744	0.967474	0.97677	0.972212	1.00132	1.07492	0.93621	0.93796	0.973451	0.979515	1.00622	1.00308	0.964489	1.00001	0.993799	0.955812	0.986729	0.979748	0.928715	0.975582	0.974217	1.00003	0.926972	0.982058	0.00714355			ROUT (Q = 1%)
	27.9851	1.05602	1.00141	0.968881	0.981004	0.972315	1.00275	1.0666	0.937988	0.935828	0.97124	0.98338	1.0081	1.0006	0.967575	1.0006	0.988338	0.959704	0.989407	0.980535	0.928752	0.968486	0.971794	0.999634	0.9329	0.982243	0.00685168
	28.4851	1.0522	0.996805	0.963555	0.979745	0.967129	0.997303	1.08067	0.934615	0.932572	0.970336	0.986388	0.998644	0.996641	0.966811	1.00135	0.992148	0.955285	0.988833	0.978847	0.926255	0.971228	0.965335	0.997538	0.917378	0.9799	0.00741003			Number of points	-EMBer	+EMBer
	28.9851	1.05837	0.99812	0.970748	0.982053	0.967751	0.998132	1.07917	0.935549	0.933413	0.984729	0.98246	1.00853	0.997461	0.966838	1.00505	0.994233	0.9568	0.990177	0.981133	0.927479	0.969504	0.968601	0.997074	0.927345	0.98253	0.00733793			# Y values analyzed	24	24
	29.4851	1.05981	1.00009	0.969893	0.977754	0.969538	0.989495	1.06821	0.931928	0.931339	0.974465	0.978516	0.999575	1.00004	0.962776	1.00573	0.995328	0.955293	0.988492	0.980074	0.920535	0.972127	0.968312	1.00135	0.934607	0.980637	0.00718229			Outliers	1	0
	29.9851	1.06066	1.00861	0.970717	0.982833	0.969971	1.00673	1.08099	0.932378	0.931928	0.971689	0.983698	1.00091	0.999761	0.960089	0.996635	0.993553	0.950238	0.986862	0.979969	0.922644	0.974837	0.961026	1.00107	0.926143	0.981415	0.00769496
	30.4851	0.996944	0.936667	0.921736	0.928128	0.917167	1.00494	1.08947	0.929766	0.929378	0.971402	0.982354	1.00143	1.00214	0.965318	0.994147	0.993781	0.953756	0.986853	0.981854	0.922189	0.977901	0.964391	1.00158	0.917229	0.969605	0.00826045			#1	1.12773
	30.9851	1.05682	1.00906	0.96998	0.979074	0.969893	1.00158	1.08678	0.928547	0.925361	0.97296	0.986643	1.00276	0.994998	0.956859	0.993082	0.99037	0.952359	0.985748	0.982573	0.921393	0.975912	0.965677	1.00076	0.931606	0.980867	0.00776889
	31.4851	1.06681	1.00731	0.971587	0.981792	0.97365	0.994412	1.08144	0.924251	0.924764	0.966989	0.976913	0.996843	0.995232	0.960745	0.996904	0.994543	0.949744	0.986574	0.974603	0.918942	0.977792	0.960573	1.0023	0.926926	0.979652	0.00796571			Unpaired t test
	31.9851	1.0569	1.00721	0.968014	0.979265	0.965405	1.00925	1.08575	0.9248	0.92664	0.965587	0.9828	1.00142	0.995374	0.963002	0.999873	0.988004	0.951669	0.987141	0.97801	0.9176	0.968569	0.958986	1.0033	0.926411	0.979624	0.0080012			P value	0.0005
	32.4851	1.12773	1.06361	1.0307	1.04334	1.02874	0.997209	1.0841	0.92695	0.92369	0.970979	0.981534	1.00614	0.997502	0.960769	0.994134	0.995593	0.949196	0.989377	0.9779	0.918006	0.970601	0.96522	1.00925	0.935382	0.993652	0.0104552			P value summary	***
	32.9851	1.05275	0.996105	0.969582	0.980627	0.97038	1.00604	1.08045	0.923012	0.925756	0.969676	0.985006	1.0031	0.991515	0.962312	0.991035	0.990662	0.945937	0.986738	0.976454	0.917696	0.970867	0.958742	1.00628	0.928657	0.978724	0.00772951			Significantly different (P < 0.05)?	Yes
	33.4851	1.05322	1.00071	0.96776	0.978209	0.969594	1.00301	1.09591	0.926022	0.924314	0.961175	0.981019	0.999058	0.999317	0.960169	0.997985	0.991402	0.946263	0.986446	0.976153	0.91622	0.964267	0.96777	1.01012	0.922331	0.979101	0.00827964			One- or two-tailed P value?	Two-tailed
																														t, df	t=3.727 df=45
		1.12773	1.06361	1.05061	1.04334	1.03779	1.01619	1.09591	1.0671	1.06286	1.00852	1.01314	1.02426	1.0213	1.00986	1.02652	1.02186	1.01279	1.01018	1.01272	1.00259	1.03984	1.05222	1.01012	1.04819					How big is the difference?
																														Mean ± SEM of column A	1.033 ± 0.005071, n=23
																														Mean ± SEM of column B	1.064 ± 0.006522, n=24
																														Difference between means	0.03097 ± 0.008309
																														95% confidence interval	0.01424 to 0.04771
																														R squared (eta squared)	0.2359
																														F test to compare variances
																														F, DFn, Dfd	1.726, 23, 22
																														P value	0.2055
																														P value summary	ns
																														Significantly different (P < 0.05)?	No
[truncated: 93 more columns]
